# Supplementary material
Source: PubMed Central journal article supplement (PMC3876224)
Supplement: 1308149110_sapp.pdf [file 1308149110_sapp.pdf]

Classification: Biological Sciences, Sustainability Science

**Biomass use, production, feed efficiencies,  
and greenhouse gas emissions from global livestock systems  
SUPPORTING INFORMATION**

Mario Herrero<sup>a,c</sup>, Petr Havlík<sup>b,c</sup>, Hugo Valin<sup>b</sup>, An M. Notenbaert<sup>c</sup>, Mariana Rufino<sup>c</sup>, Philip K. Thornton<sup>d</sup>, Michael Blümmel<sup>c</sup>, Franz Weiss<sup>b</sup>, Delia Grace<sup>c</sup>, Michael Obersteiner<sup>b</sup>

<sup>a</sup>Commonwealth Scientific and Industrial Research Organisation,  
306 Carmody Road, St Lucia, QLD 4067, Australia

<sup>b</sup>International Institute for Applied Systems Analysis (IIASA), Laxenburg, Austria

<sup>c</sup>International Livestock Research Institute (ILRI), P.O. Box 30709, Nairobi, Kenya

<sup>d</sup>CGIAR Research Programme on Climate Change, Agriculture and Food Security (CCAFS),  
ILRI, Nairobi, Kenya

Correspondence:

Dr Mario Herrero, email: [Mario.herrero@csiro.au](mailto:Mario.herrero@csiro.au), tel +61 477 764 244.

Commonwealth Scientific and Industrial Research Organisation

306 Carmody Road, St Lucia, Qld 4067, Australia

## TABLE OF CONTENT

|    |                                                                              |     |
|----|------------------------------------------------------------------------------|-----|
| 1. | Livestock production systems classification and animal numbers .....         | 3   |
| 2. | Global maps for results on biomass use, production and GHG emissions .....   | 7   |
| 3. | Livestock system efficiencies .....                                          | 36  |
| 4. | Disaggregation of monogastrics into smallholder and industrial systems ..... | 43  |
| 5. | Modelling intake, nutrient supply, excretion and methane emissions .....     | 47  |
| 6. | Diets for different livestock species .....                                  | 59  |
| 7. | Estimation of N <sub>2</sub> O emissions from manure management .....        | 84  |
| 8. | Estimation of CH <sub>4</sub> emissions from manure management .....         | 94  |
| 9. | Estimation of N <sub>2</sub> O direct emissions from managed soils.....      | 104 |

## **1. Livestock production systems classification and animal numbers**

### **a. Livestock production systems**

The livestock system classification used was developed in 1995 (1) and updated recently (2). It distinguishes solely livestock systems and mixed crop-livestock farming systems. Solely livestock systems are those in which more than 90 percent of dry matter fed to animals comes from rangelands, pastures, annual forages and purchased feeds and less than 10 percent of the total value of production comes from non-livestock farming activities. Mixed farming systems are those in which more than 10 percent of the dry matter fed to animals comes from crop by-products, stubble or more than 10 percent of the total value of production comes from non-livestock farming activities.

The solely livestock systems are split into two. The grassland-based systems are those in which more than 10 percent of the dry matter fed to animals is produced on the farm and in which annual average stocking rates are less than 10 temperate livestock units per hectare of agricultural land. The landless livestock production systems are those in which less than 10 percent of the dry matter fed to animals is produced on the farm and in which annual average stocking rates are above 10 temperate livestock units per hectare of agricultural land. The mixed systems are broken down into two categories:

- Rain-fed mixed farming systems, in which more than 90 percent of the value of non-livestock farm production comes from rain-fed land use.
- Irrigated mixed farming systems, in which more than 10 percent of the value of non-livestock farm production comes from irrigated land use.

The livestock-only and mixed farming systems are further characterised by agro-climatology, based on temperature and length of growing period (LGP), the number of days per year during which crop growth is possible:

- Arid and semi-arid,  $LGP \leq 180$  days.
- Humid and sub-humid,  $LGP > 180$  days.
- Tropical highlands or temperate. Temperate regions are defined as those with one month or more with monthly mean temperature, corrected to sea level, below 5 °C. Tropical highlands are defined as those areas with a daily mean temperature, during the growing period, of between 5 and 20 °C.

This classification system cannot be mapped directly, because appropriate data at the farm level are simply not available. Many of the categories can be mapped using proxy variables for which global data exist, however; details of the methods used are given in (2). Briefly, cropland and rangeland are defined from GLC 2000 (3), modified by human population density thresholds from the 1-km Global Rural-Urban Mapping Project (GRUMP) data(4). Urban areas are defined based on a combination of the GRUMP dataset and the GLC 2000 urban class. Irrigated areas are based on the FAO Aquastat map Version 4.0.1 (5). The mixed rain-fed, mixed irrigated and rangeland system categories, as defined above, are subdivided based on LGP and climate data layers developed from the WorldCLIM 1-km data for 2000 (6) together with a “highlands” layer for the same year based on the same dataset (7).

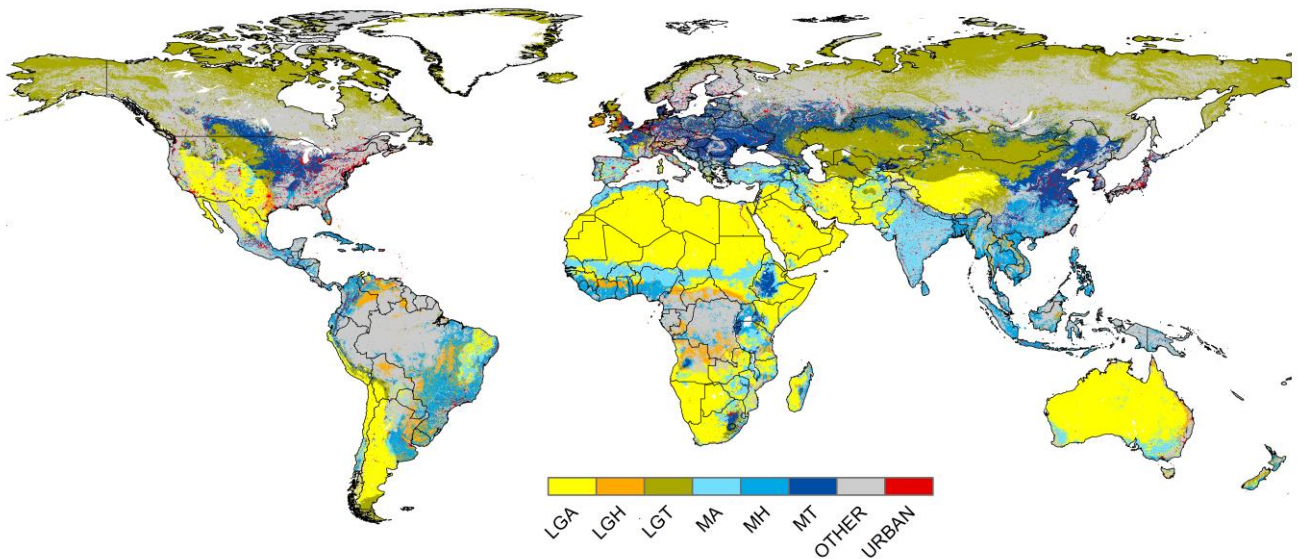

Figure S 1. Global livestock production systems. Adapted from (2).

### **b. Distribution of animal numbers**

The animal distribution data was sourced from the “Gridded Livestock of the World” (GLW). This dataset includes global distribution maps for the following species of livestock: cattle, buffalo, sheep, goats, pigs and poultry/chickens.

The methodology for creating this dataset is described in detail in (8). In summary, the maps are created through the spatial disaggregation of sub-national statistical data based on empirical relationships with environmental variables in similar agro-ecological zones. The first stage in the mapping process is to collect available subnational livestock statistics. Complete subnational population datasets for all livestock species are not available for all countries. Therefore these incomplete datasets were, where possible, rectified by using data available for a higher administrative level. As a next step, the extent of land unsuitable for livestock production was delineated based on criteria such as protected areas, land cover, climate, topography and vegetation. Once the available agricultural statistics have been collected, standardized, enhanced with supplementary data and adjusted for the extent of land deemed suitable for livestock production, the resulting data archive provides a sound basis for statistical distribution modelling. Statistical relationships are established between observed livestock densities and predictor variables. The resulting equations are then applied to spatial data of the predictor variables so as to produce a predicted distribution map.



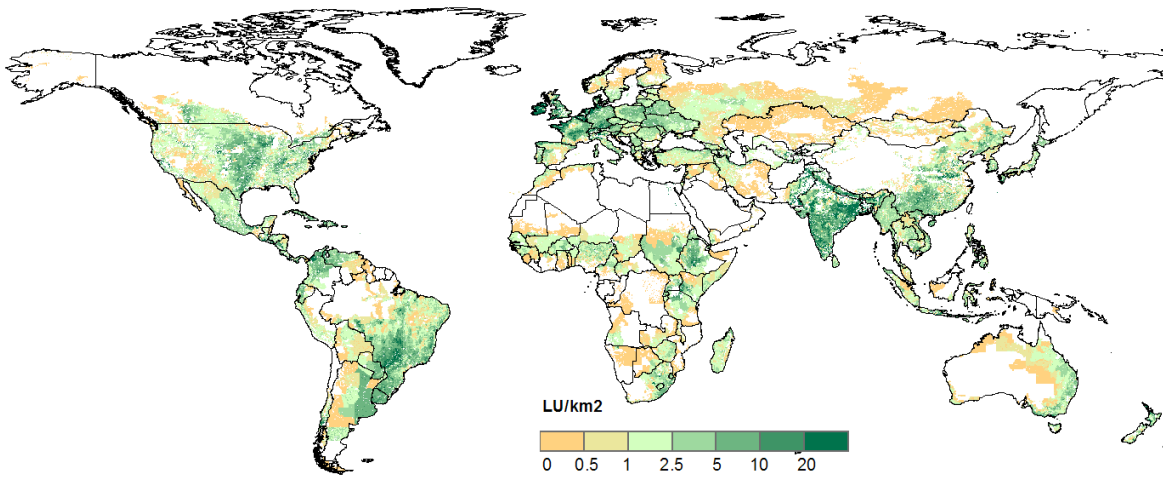

Figure S 2. Bovine livestock units density in the year 2000 (source: (8))

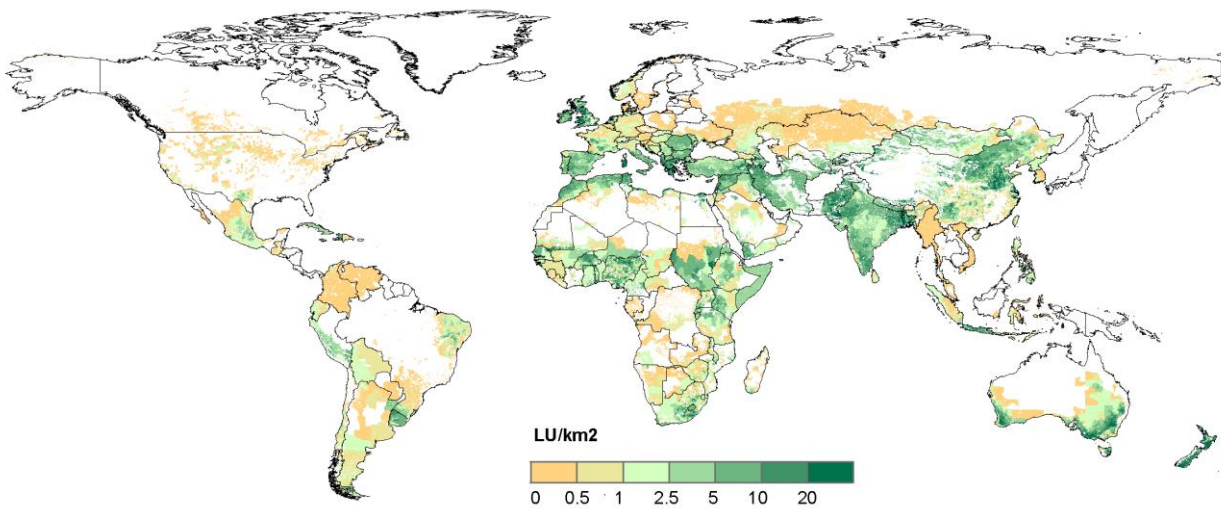

Figure S 3. Small ruminant livestock units density in the year 2000 (source:(8))

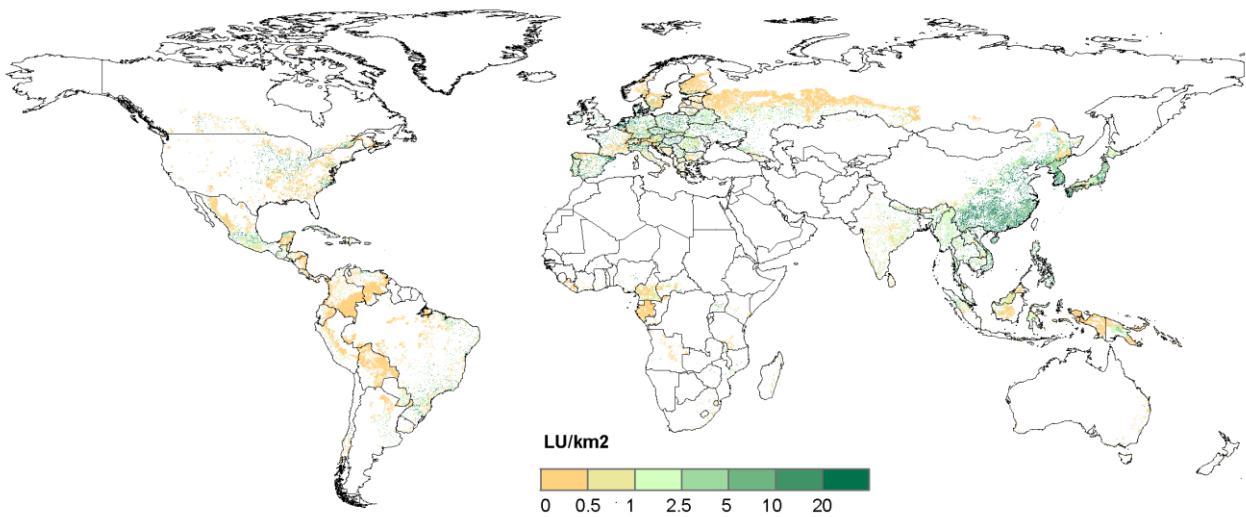

Figure S 4. Pig livestock units density in the year 2000 (source: (8))

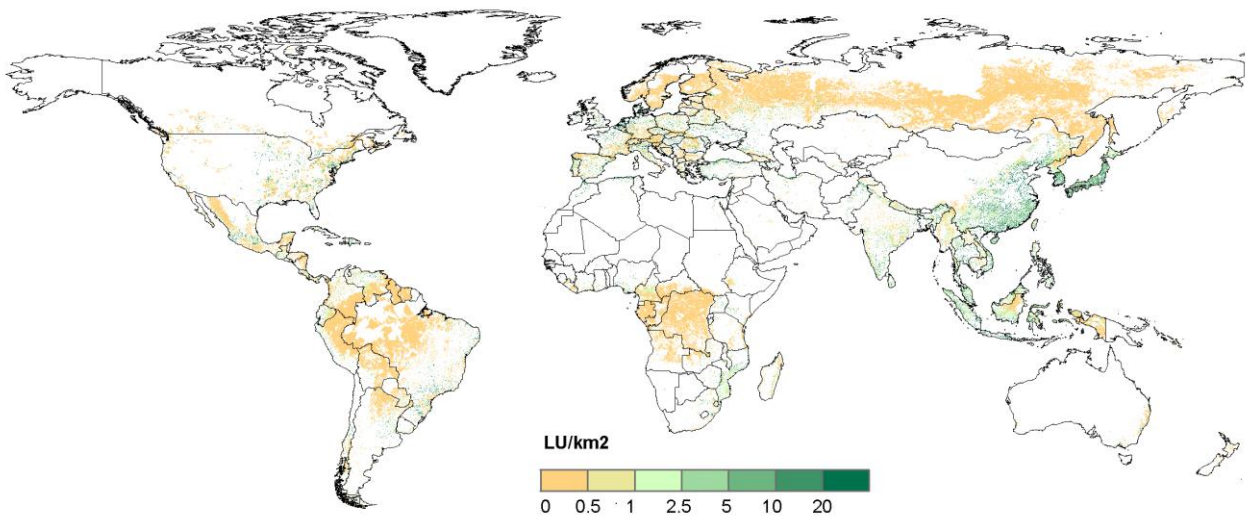

Figure S 5. Poultry livestock units density in the year 2000 (source: (8))

## 2. Global maps for results on biomass use, production and GHG emissions

### a. Map coverage

Table S 1. List of high-resolution global livestock data layers for the year 2000.

| Variable                                                    | Implemented for                                                        |
|-------------------------------------------------------------|------------------------------------------------------------------------|
| Feed consumption (MT/km <sup>2</sup> /year)                 |                                                                        |
| Total feed                                                  | Bovines, bovine products, SR, SR products, ruminants                   |
| Grazing                                                     | Bovines, bovine products, SR, SR products, ruminants                   |
| Stover                                                      | Bovines, bovine products, SR, SR products, ruminants                   |
| Grain                                                       | Bovines, bovine products, SR, SR products, ruminants, pigs and poultry |
| Occasional fodder                                           | Bovines, bovine products, SR, SR products, ruminants                   |
| Total feed                                                  | Bovines, bovine products, SR, SR products, ruminants, pigs and poultry |
| Production (MT/km <sup>2</sup> /year)                       |                                                                        |
| Meat                                                        | Bovines, SR, pigs, poultry                                             |
| Milk                                                        | Bovines, SR                                                            |
| Eggs                                                        | Poultry                                                                |
| Manure (MT/km <sup>2</sup> /year)                           | Bovines, bovine products, SR and SR products, pigs, poultry            |
| N excretion (kg/km <sup>2</sup> /year)                      | Bovines, bovine products, SR and SR products, pigs, poultry            |
| GHG emissions (MT CO <sub>2</sub> eq/km <sup>2</sup> /year) |                                                                        |
| N <sub>2</sub> O emissions                                  | Bovines, bovine products, SR and SR products, pigs, poultry            |
| Methane emissions                                           | Bovines, bovine products, SR and SR products, pigs                     |
| GHG efficiency (kg CO <sub>2</sub> eq/kg)                   |                                                                        |
| GHG efficiency per kg product                               | Bovine products, SR products, pork, poultry                            |
| GHG efficiency per kg edible protein                        | Bovine products, SR products, pork, poultry                            |
| Methane efficiency per kg product                           | Bovine products, SR products                                           |
| Methane efficiency per kg edible protein                    | Bovine products, SR products                                           |
| N <sub>2</sub> O efficiency per kg product                  | Bovine products, SR products                                           |
| N <sub>2</sub> O efficiency per kg edible protein           | Bovine products, SR products                                           |
| Value Of Production (000 \$/km <sup>2</sup> /yr)            | All products , total                                                   |
| Nutritional Value (Kcal/person/day)                         | Ruminant products                                                      |

**b. Map results**

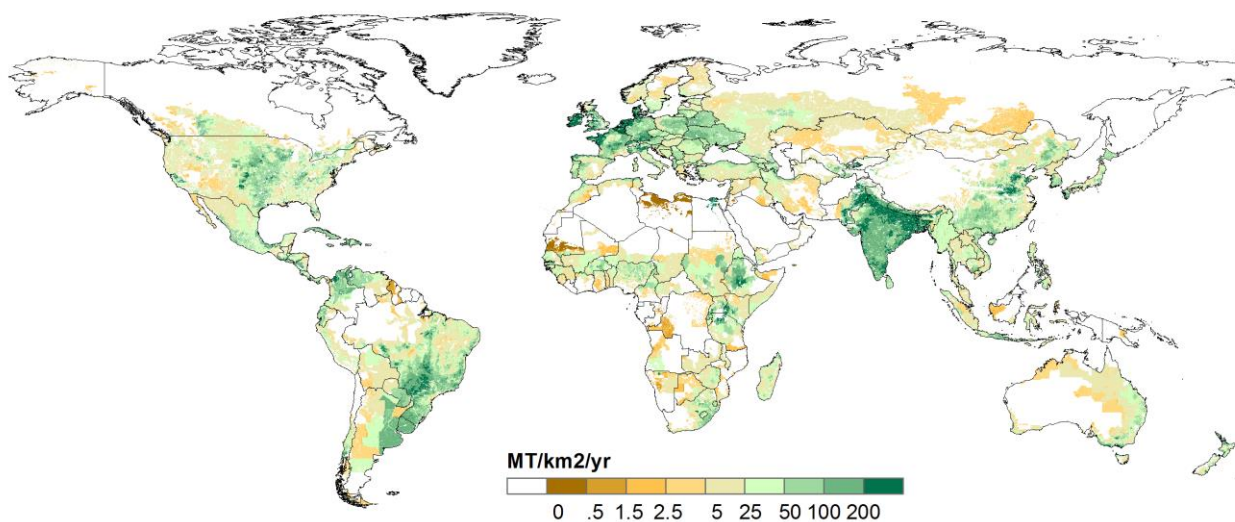

Figure S 6. Total feed biomass consumption by bovines in the year 2000

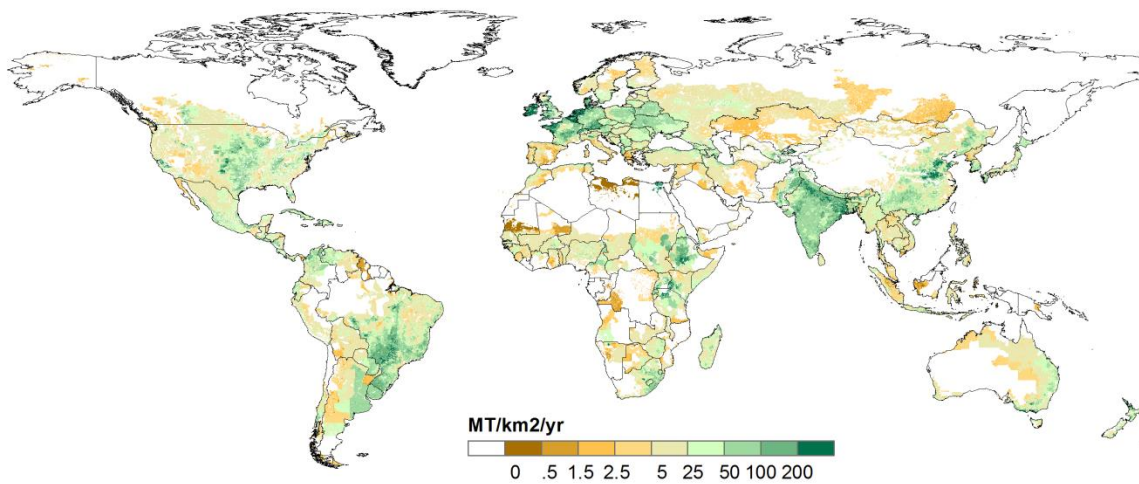

Figure S 7. Grazing biomass consumption by bovines in the year 2000

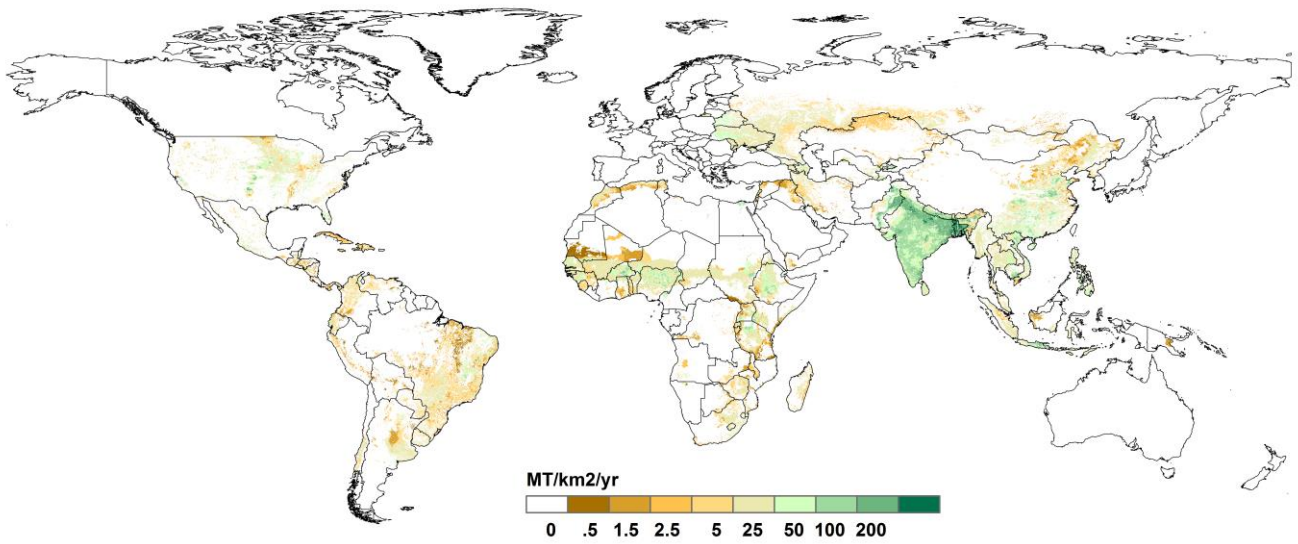

Figure S 8. Stover biomass consumption by bovines in the year 2000

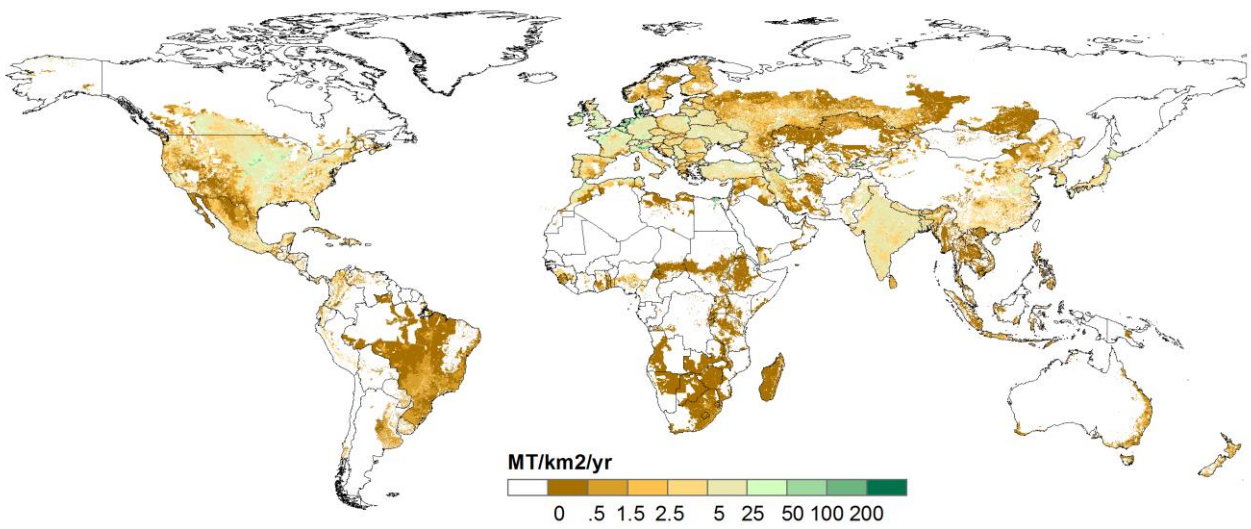

Figure S 9. Grain biomass consumption by bovines in the year 2000



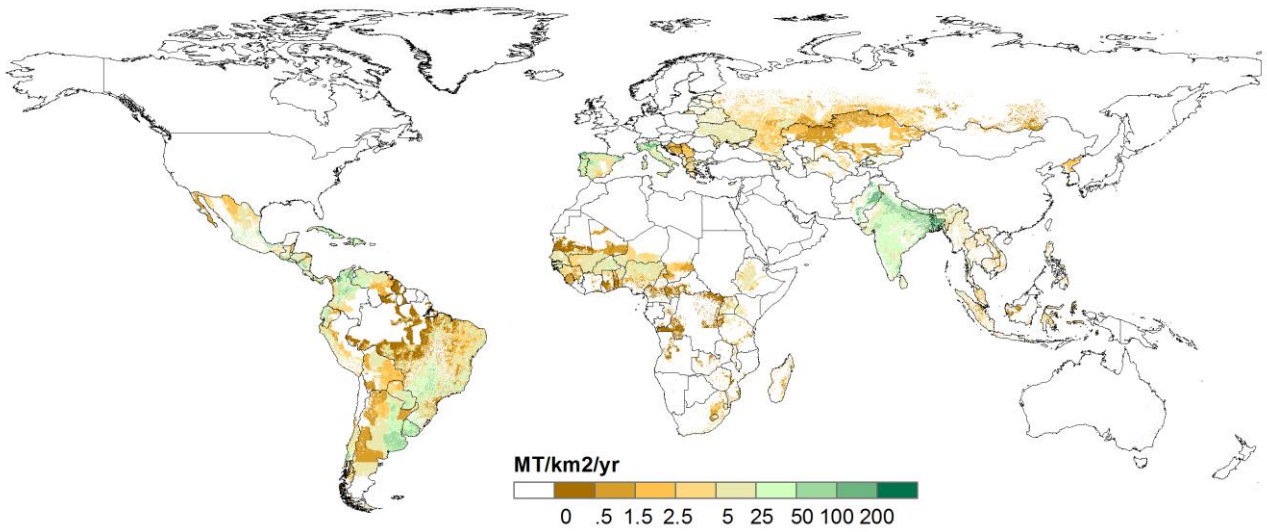

Figure S 10. Occasional biomass consumption by bovines in the year 2000

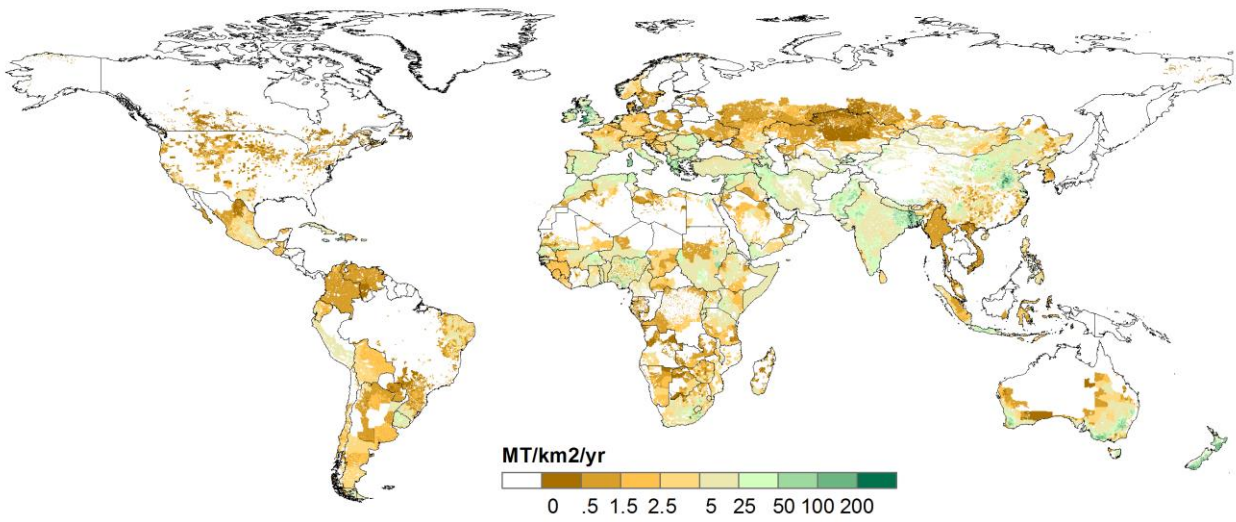

Figure S 11. Total biomass consumption by small ruminants in the year 2000

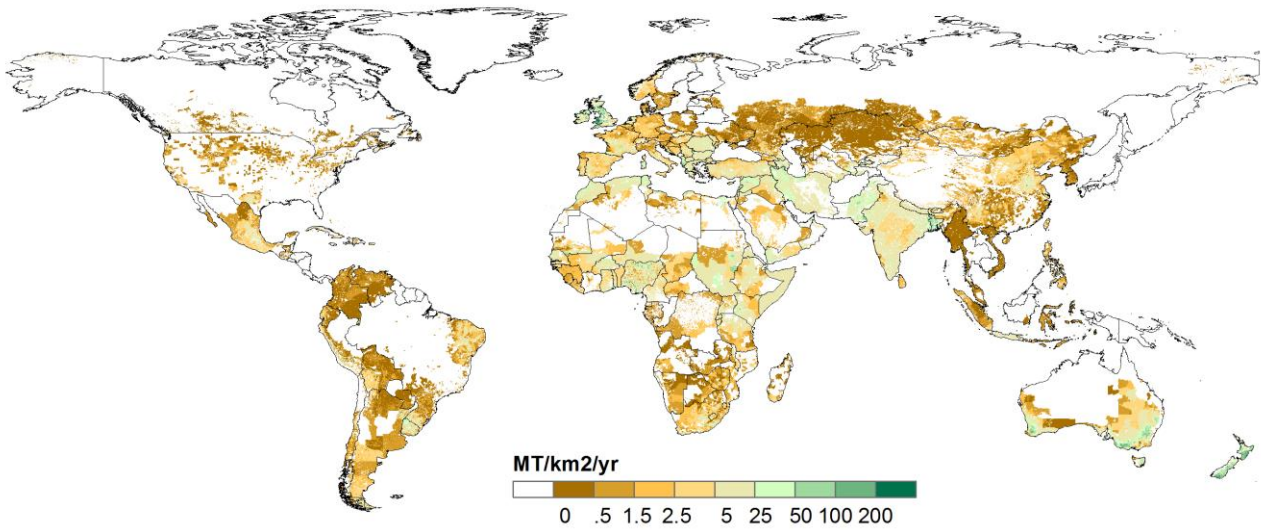

Figure S 12. Grazing biomass consumption by small ruminants in the year 2000

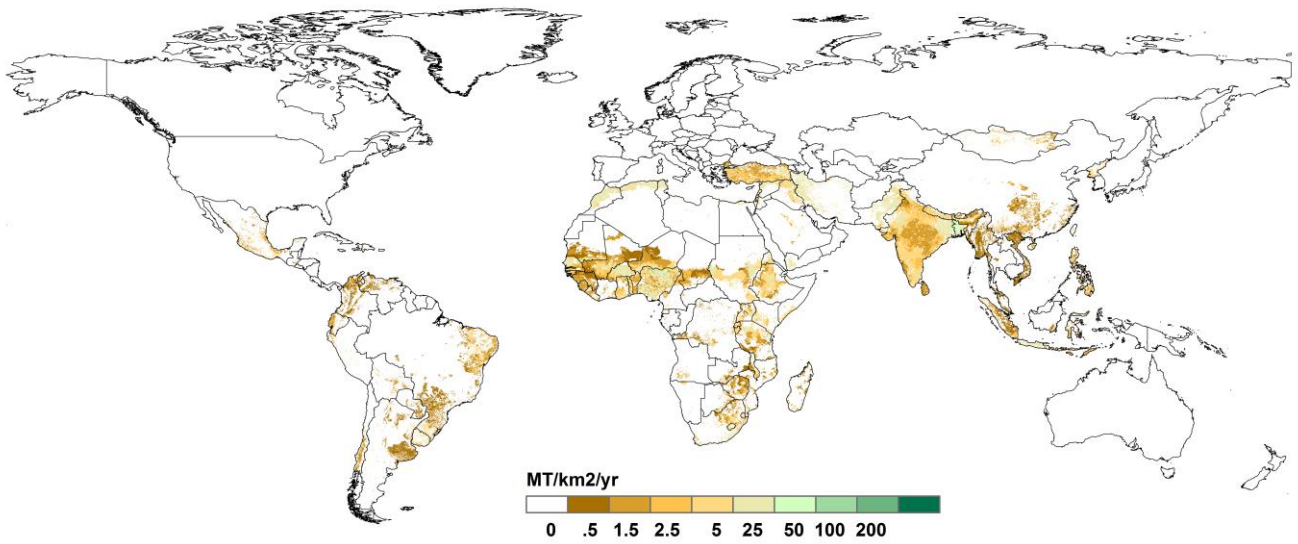

Figure S 13. Stover biomass consumption by small ruminants in the year 2000

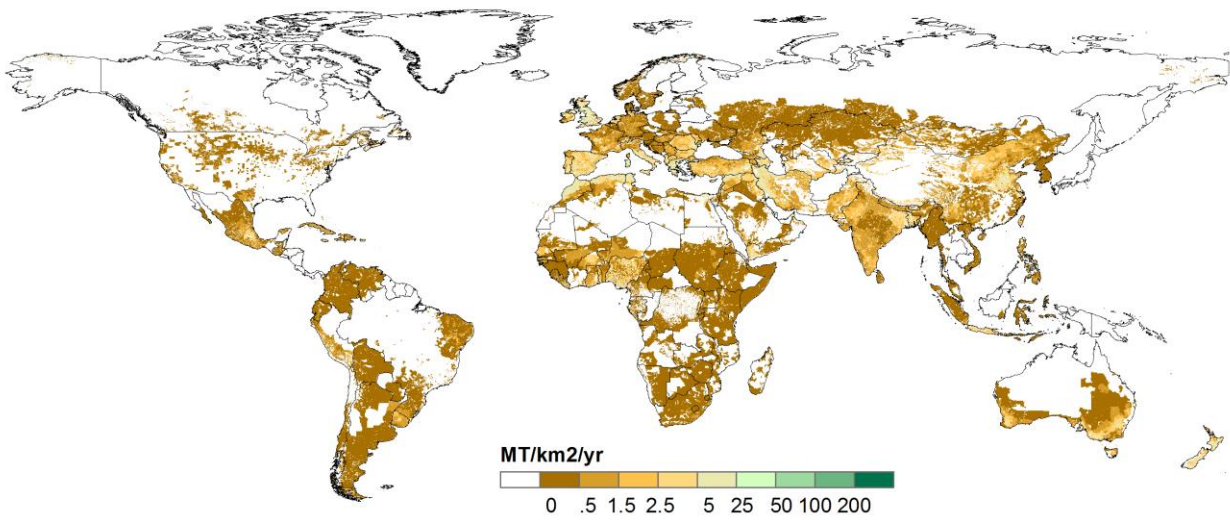

Figure S 14. Grain biomass consumption by small ruminants in the year 2000

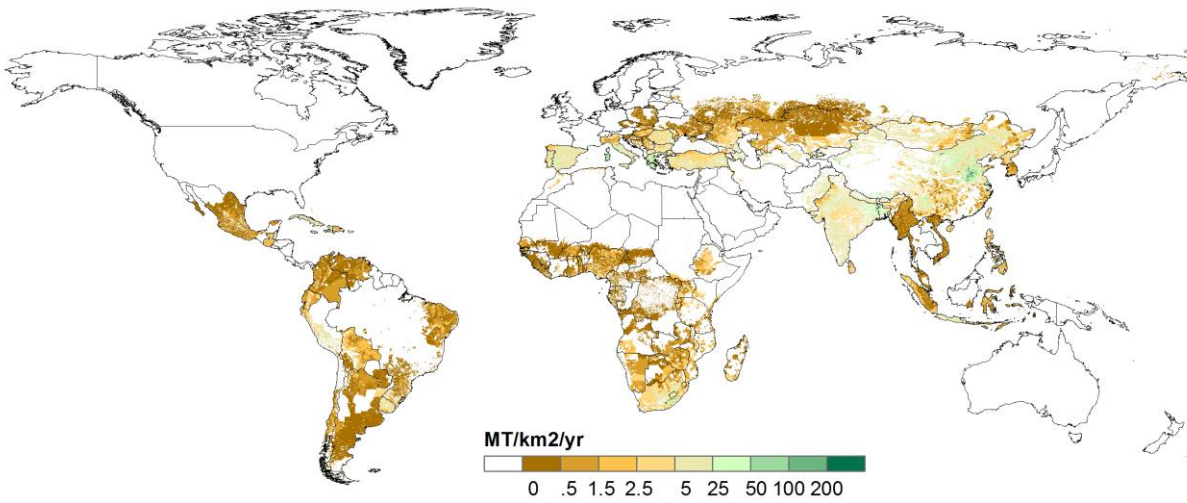

Figure S 15. Occasional biomass consumption by small ruminants in the year 2000



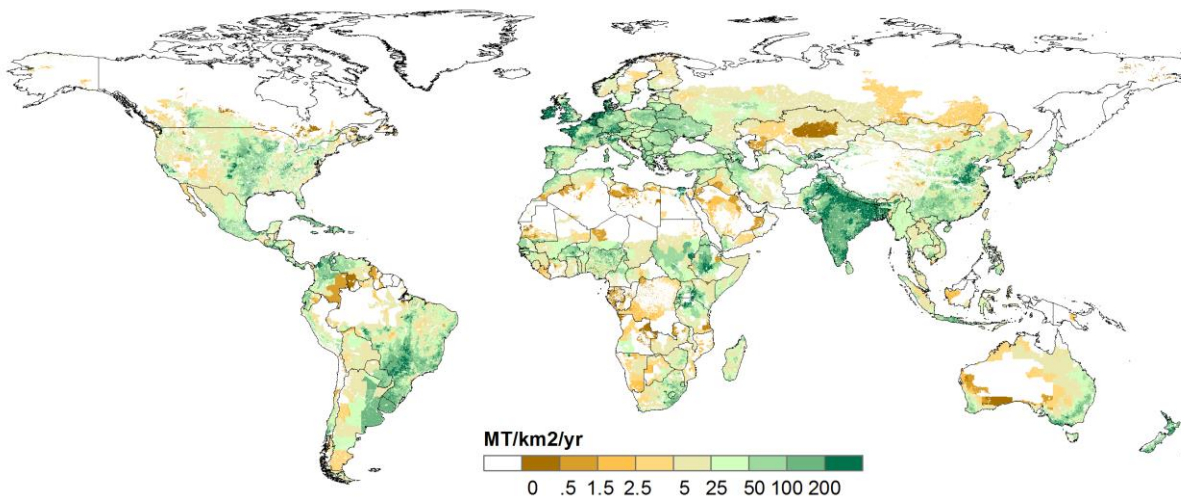

Figure S 16. Total biomass consumption by ruminants in the year 2000

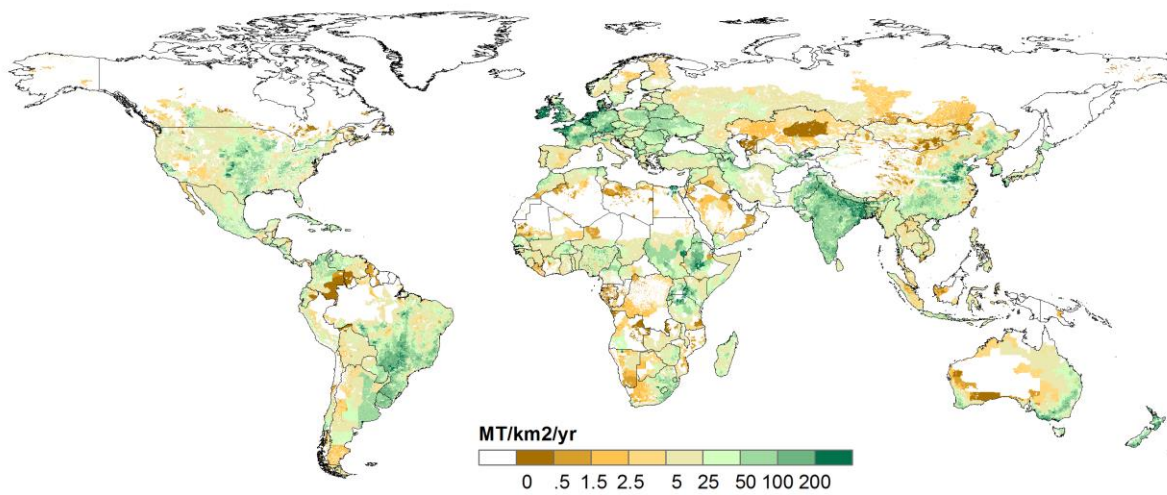

Figure S 17. Grazing Biomass consumption by ruminants in the year 2000

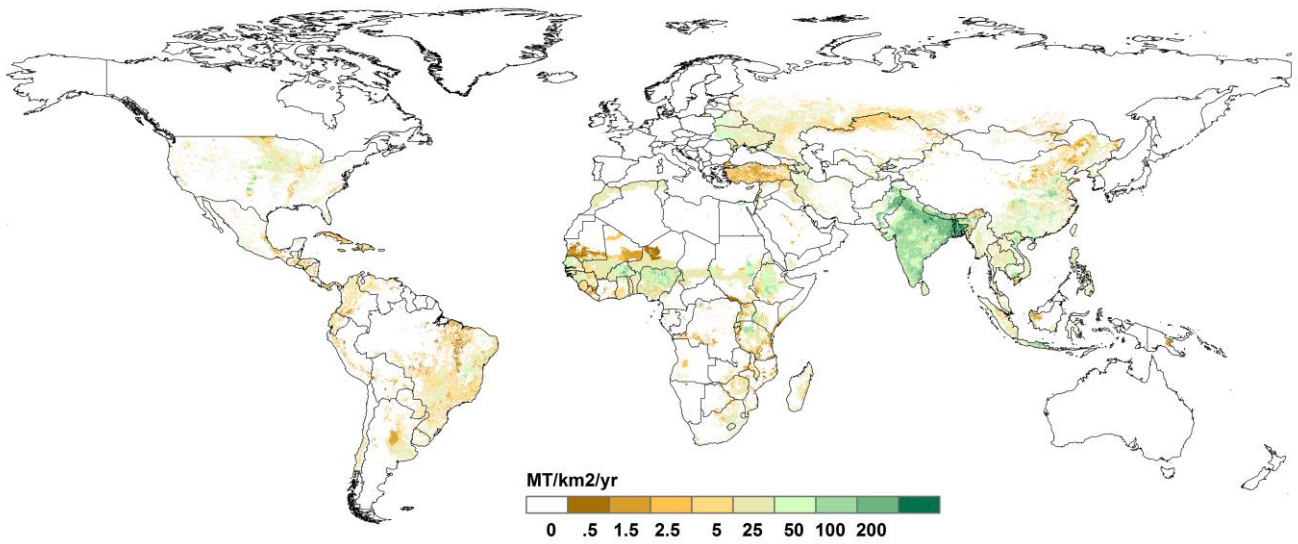

Figure S 18. Stover biomass consumption by ruminants in the year 2000

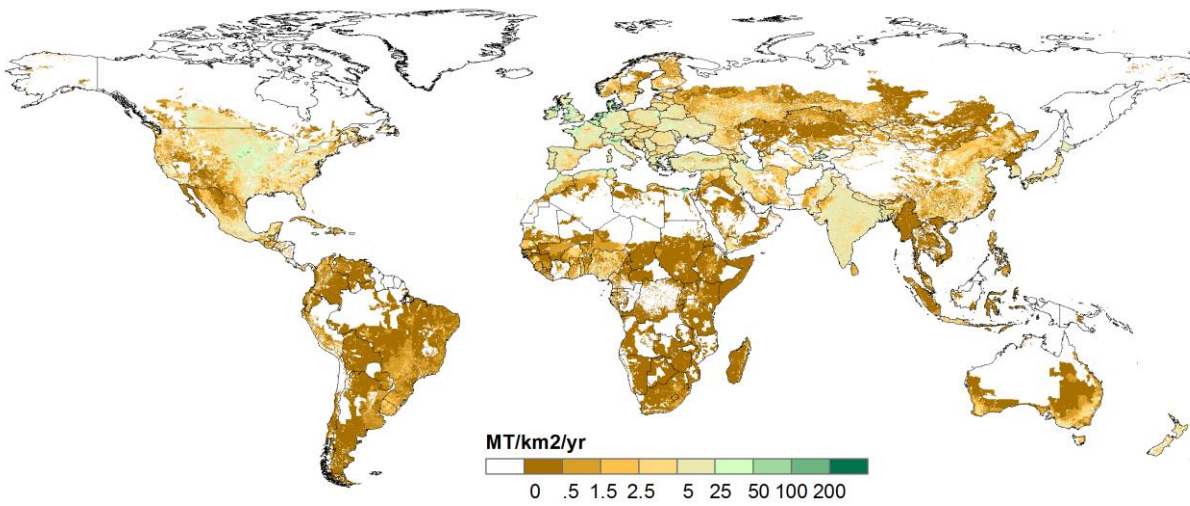

Figure S 19. Grain biomass consumption by ruminants in the year 2000

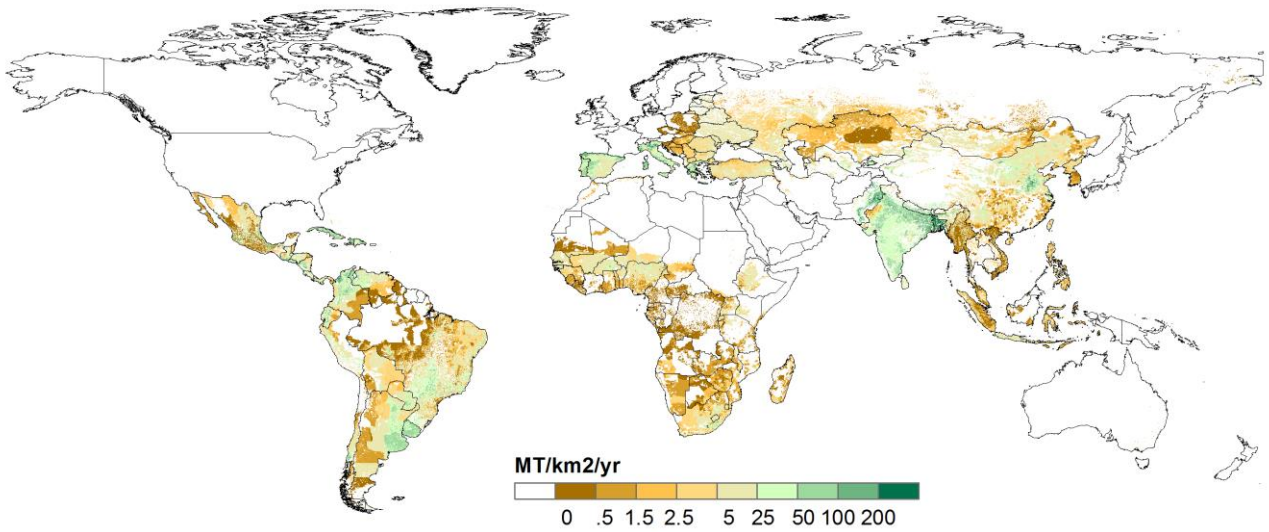

Figure S 20. Occasional biomass consumption by ruminants in the year 2000

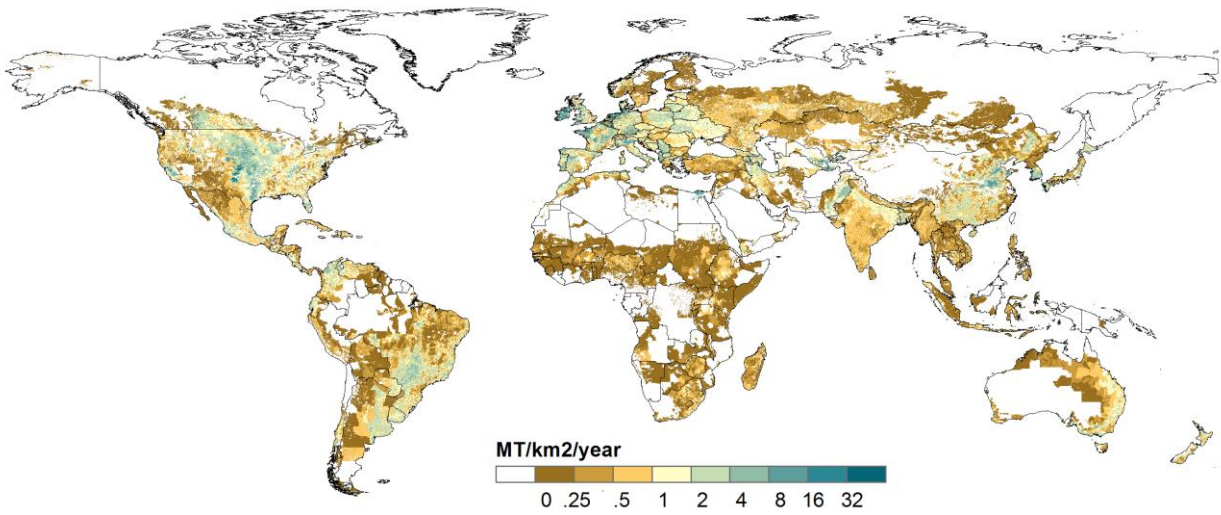

Figure S 21. Bovine meat production density in the year 2000



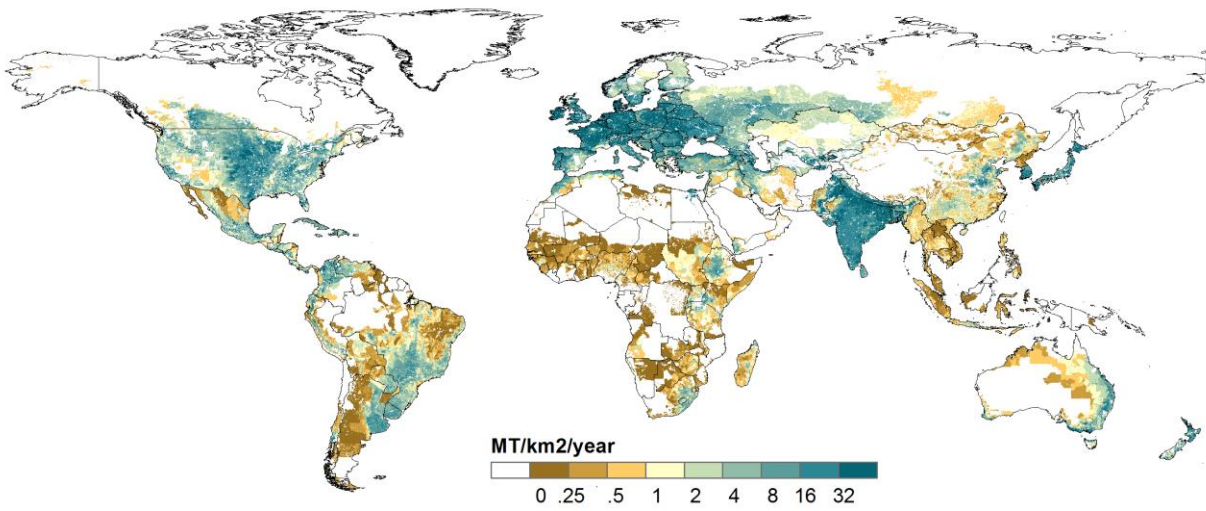

Figure S 22. Bovine milk production density in the year 2000

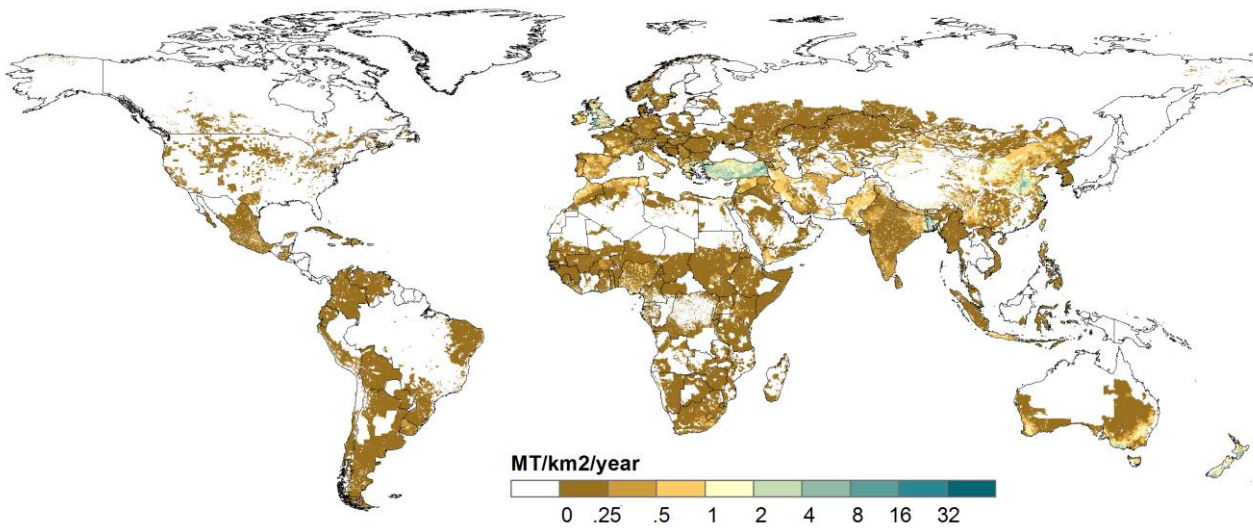

Figure S 23. Small ruminant meat production density in the year 2000

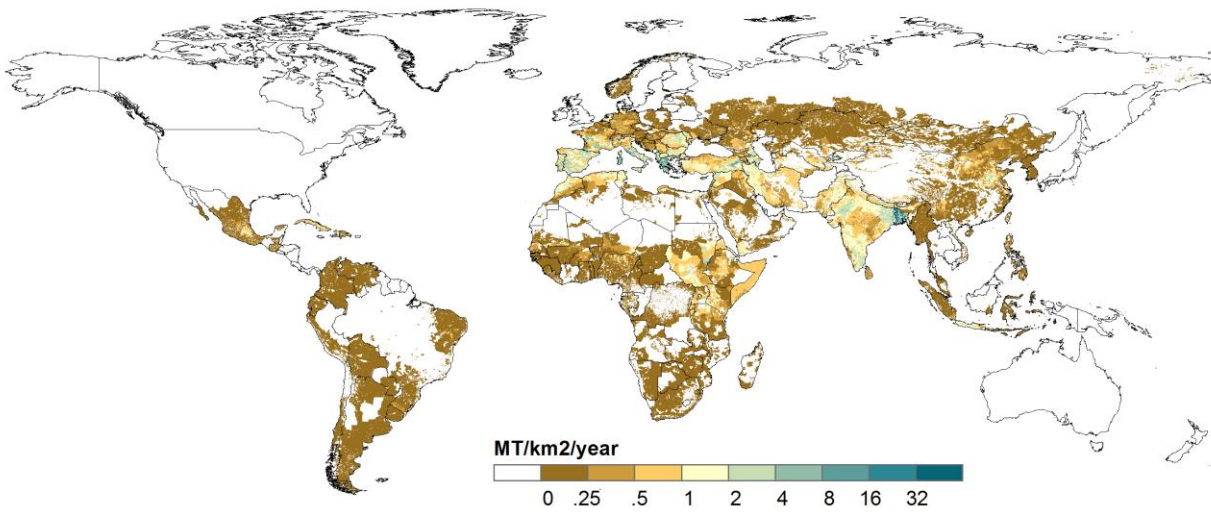

Figure S 24. Small ruminant milk production density in the year 2000

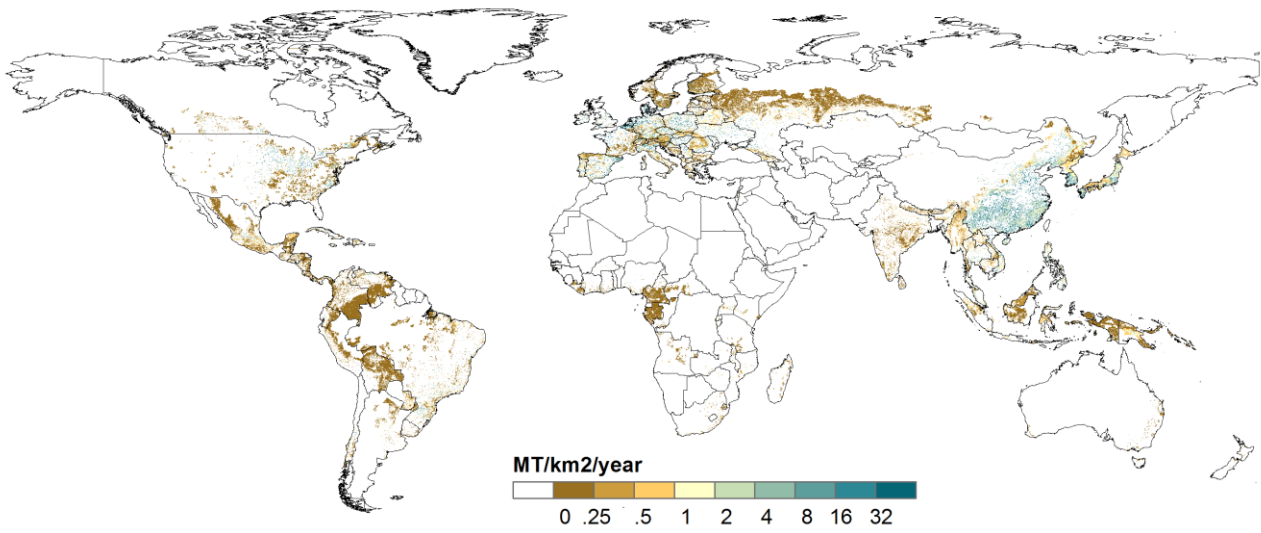

Figure S 25. Pig meat production density in the year 2000

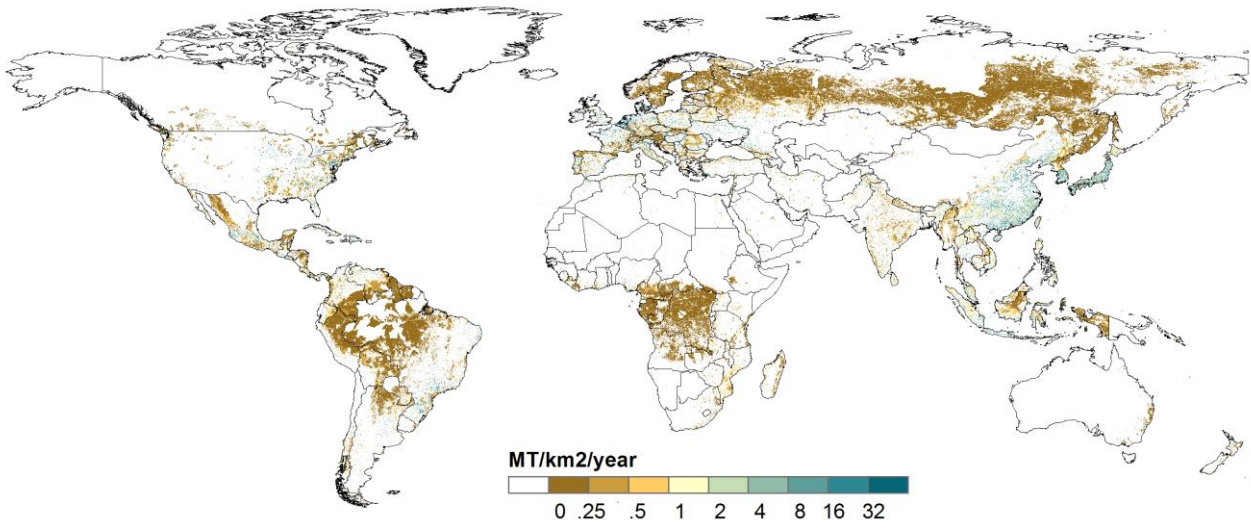

Figure S 26. Poultry eggs production density in the year 2000

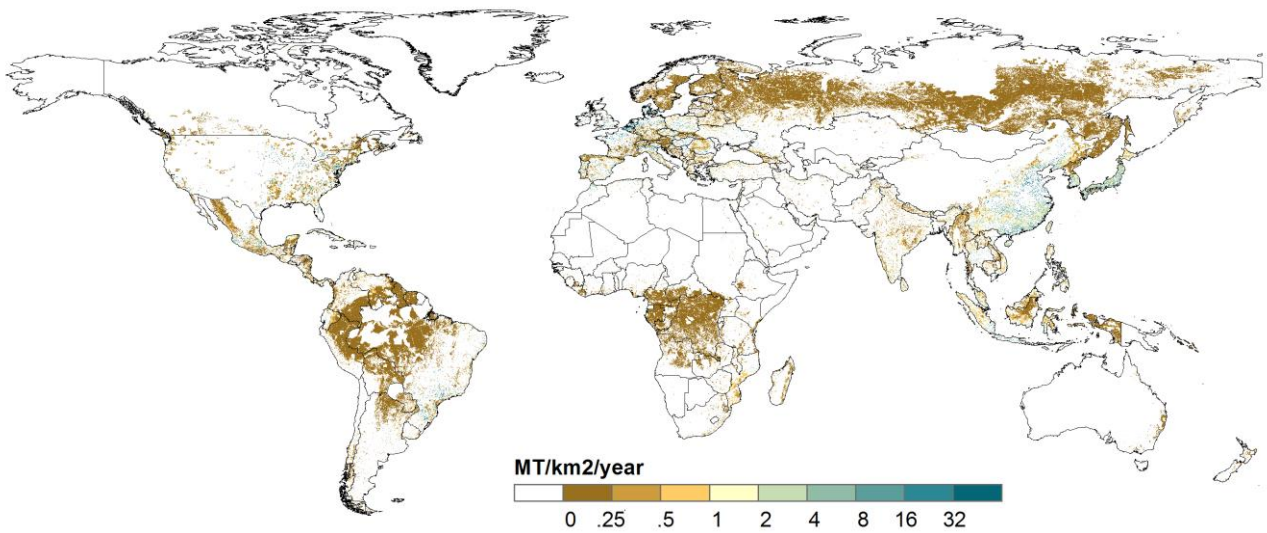

Figure S 27. Poultry meat production density in the year 2000



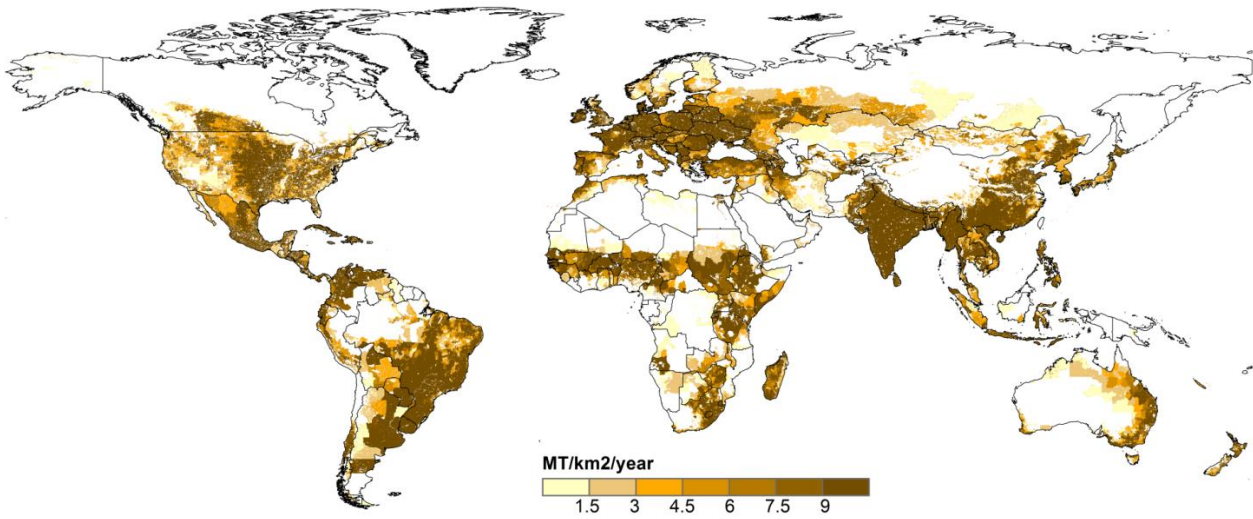

Figure S 28. Manure by bovines in the year 2000

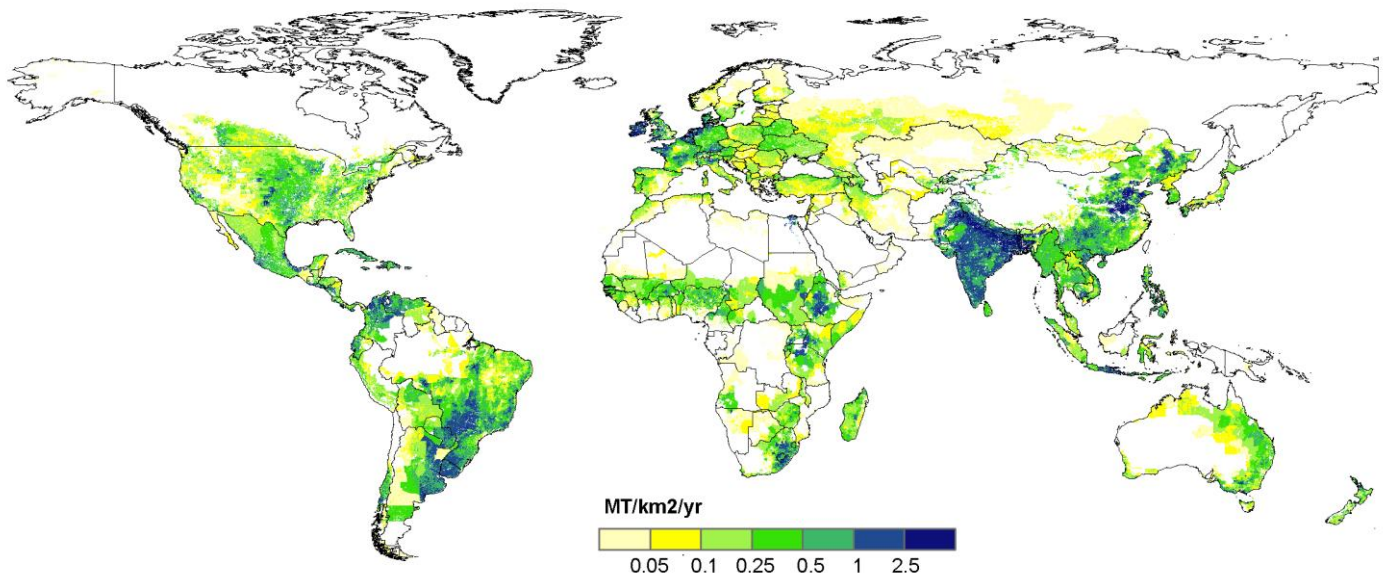

Figure S 29. Nitrogen excretion associated with bovine meat production in the year 2000

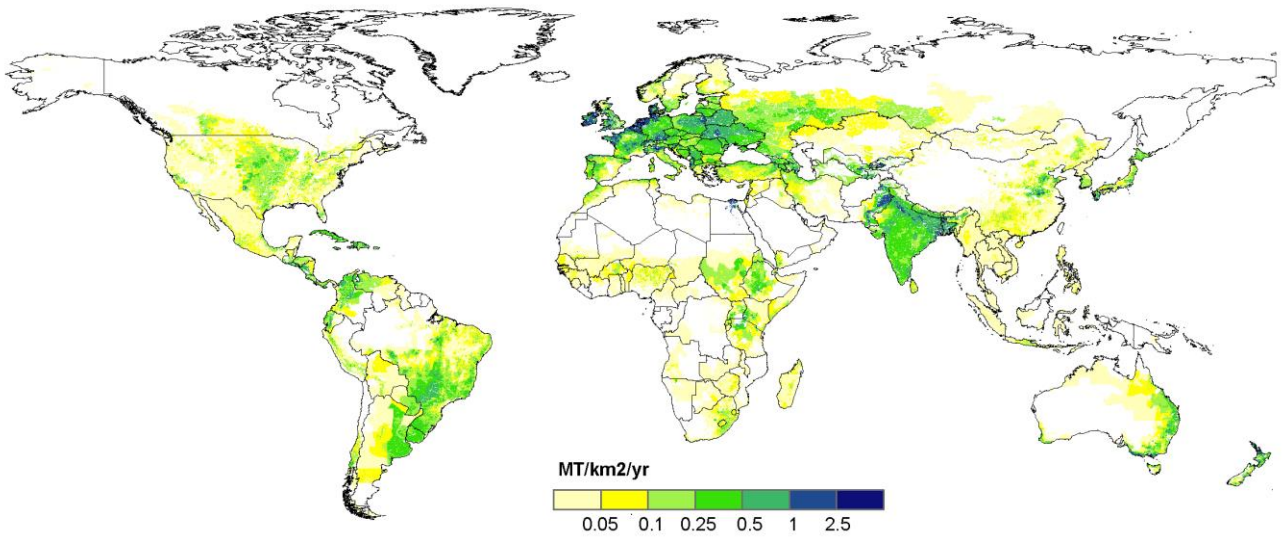

Figure S 30. Nitrogen Excretion associated with bovine milk production in the year 2000

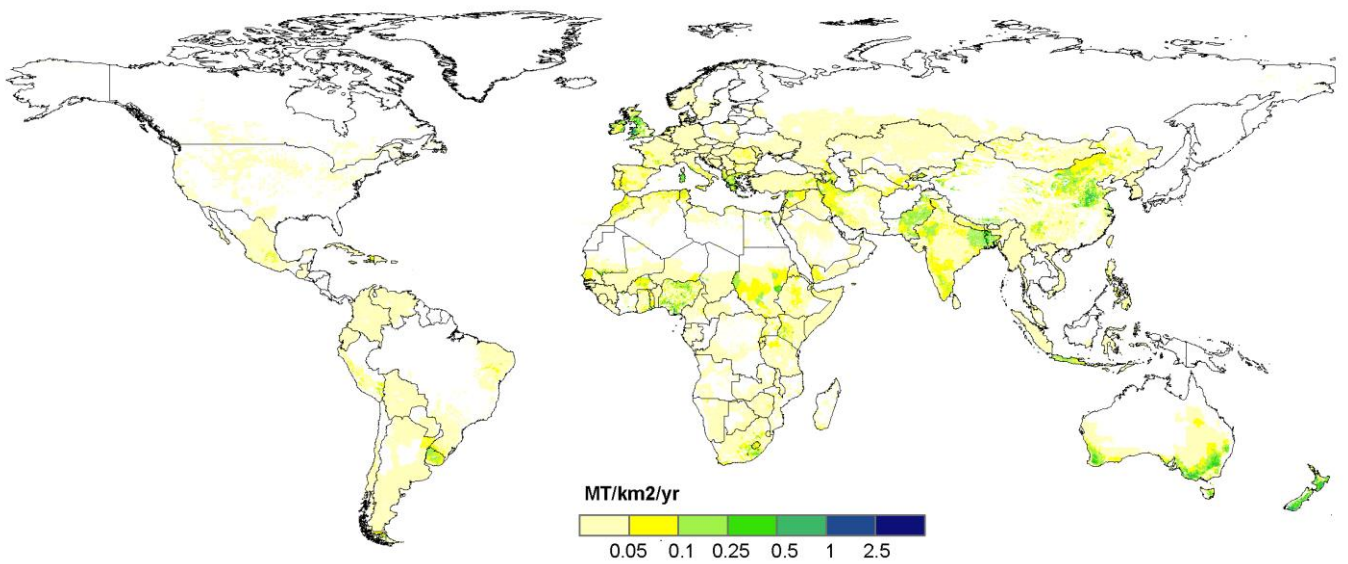

Figure S 31. Nitrogen Excretion associated with Small ruminant meat production in the year 2000



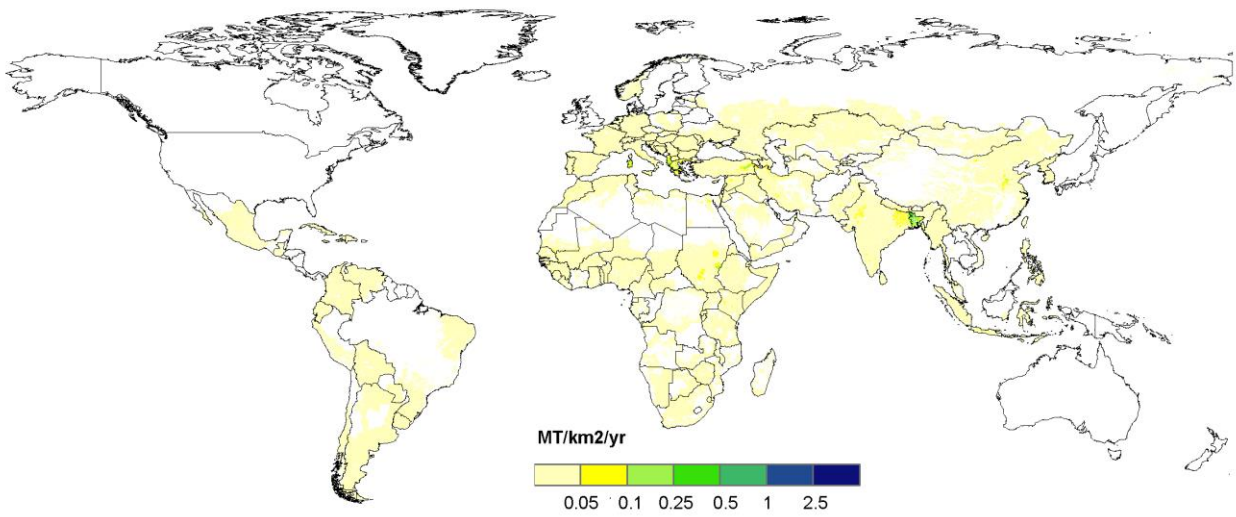

Figure S 32. Nitrogen excretion associated with small ruminant milk production in the year 2000

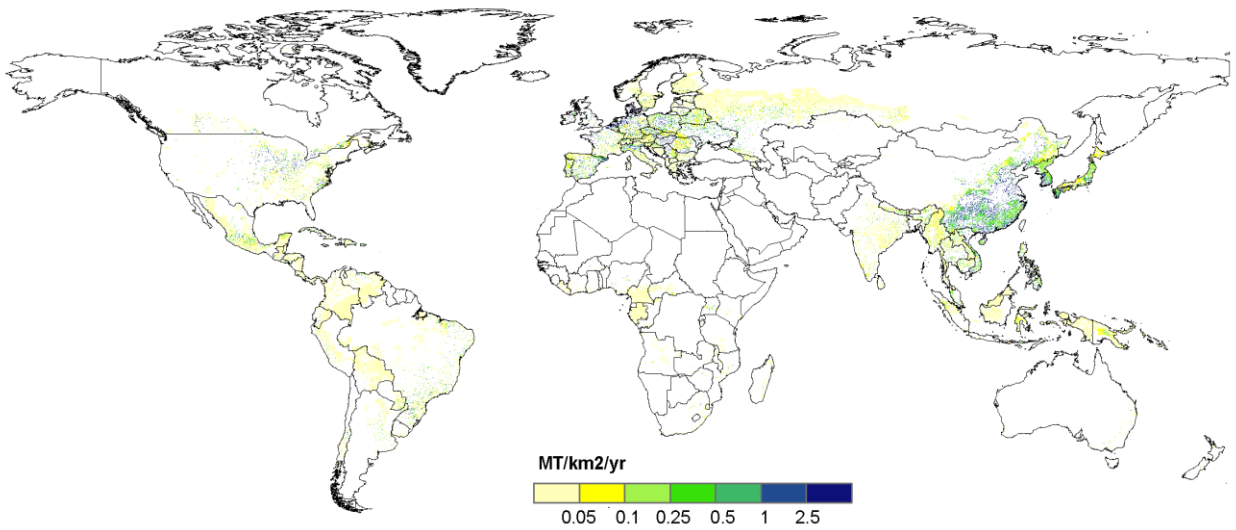

Figure S 33. Nitrogen excretion associated with pig meat production in the year 2000

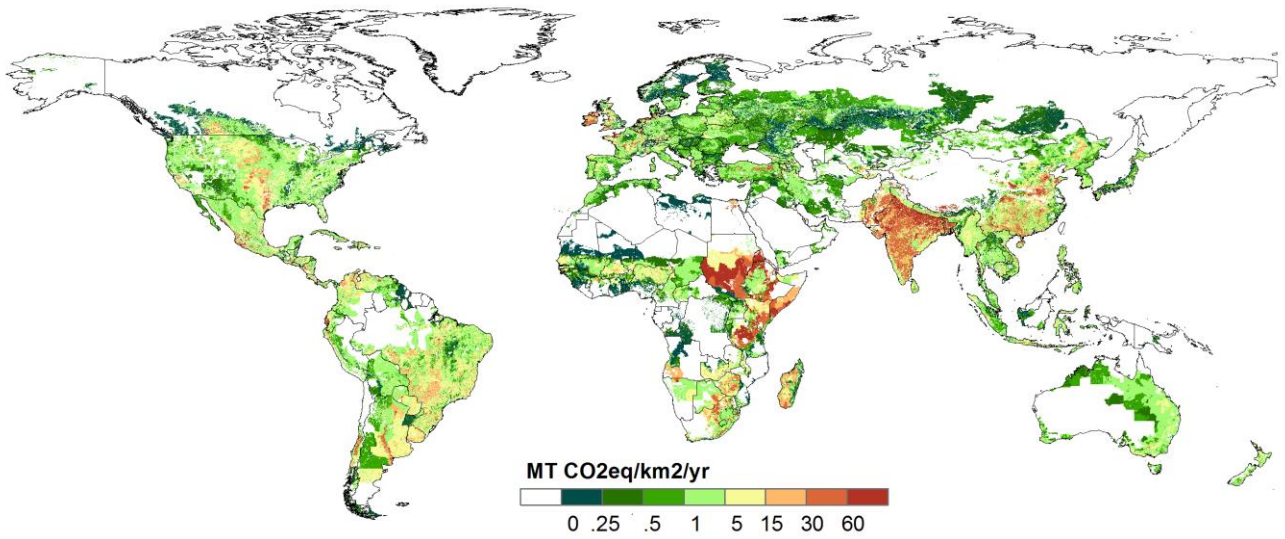

Figure S 34. Nitrous oxide emissions associated with bovine meat production in the year 2000

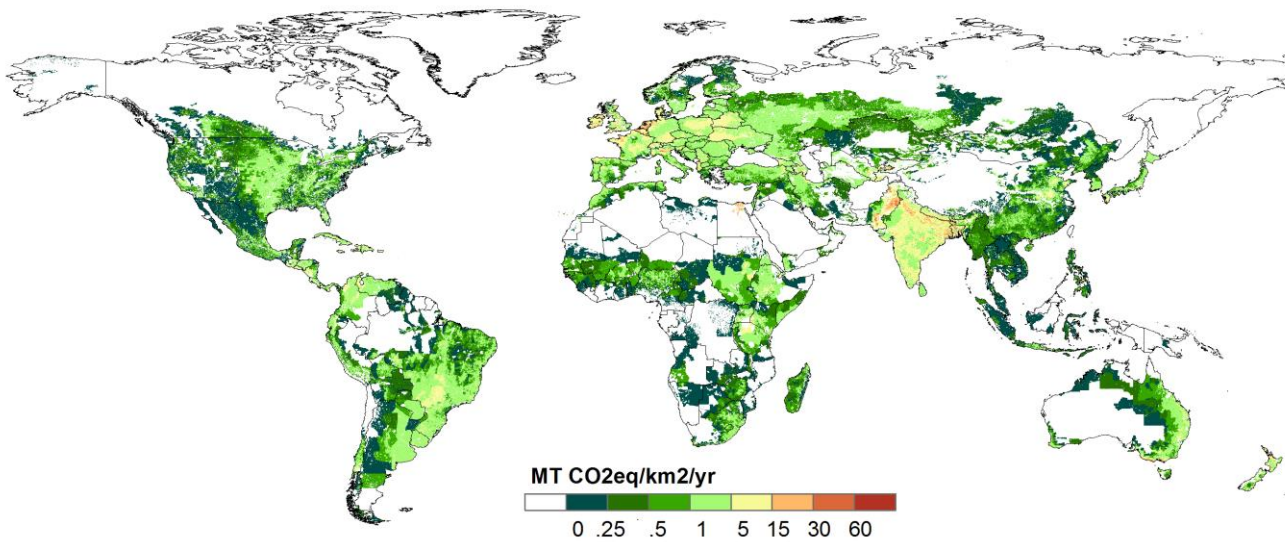

Figure S 35. Nitrous oxide emissions associated with bovine milk production in the year 2000

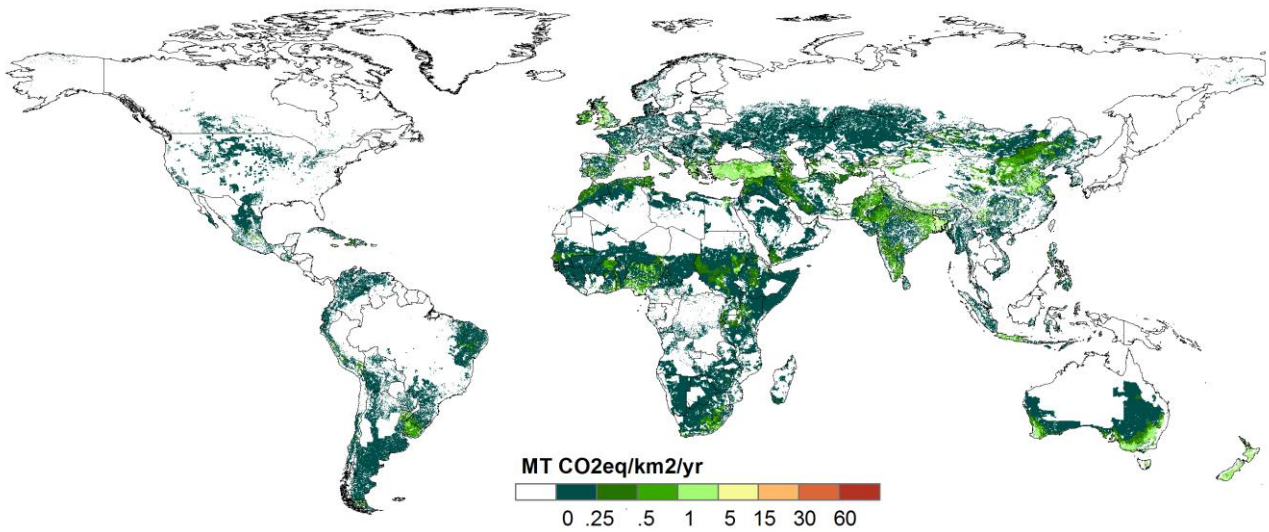

Figure S 36. Nitrous oxide emissions associated with small ruminant meat production in the year 2000

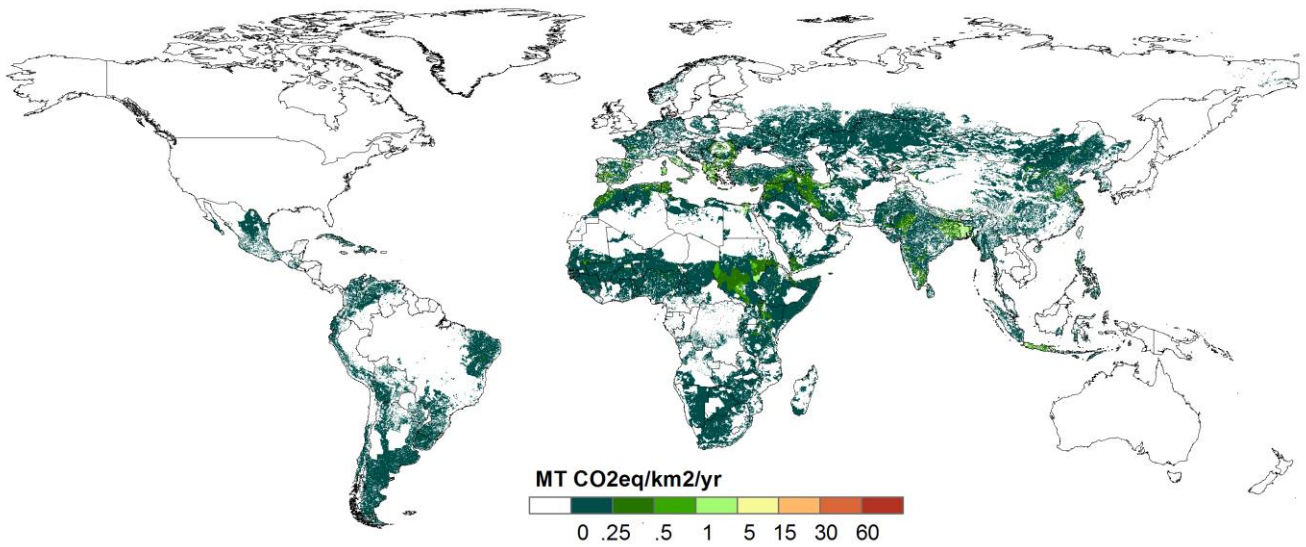

Figure S 37. Nitrous oxide Emissions associated with small ruminant milk production in the year 2000



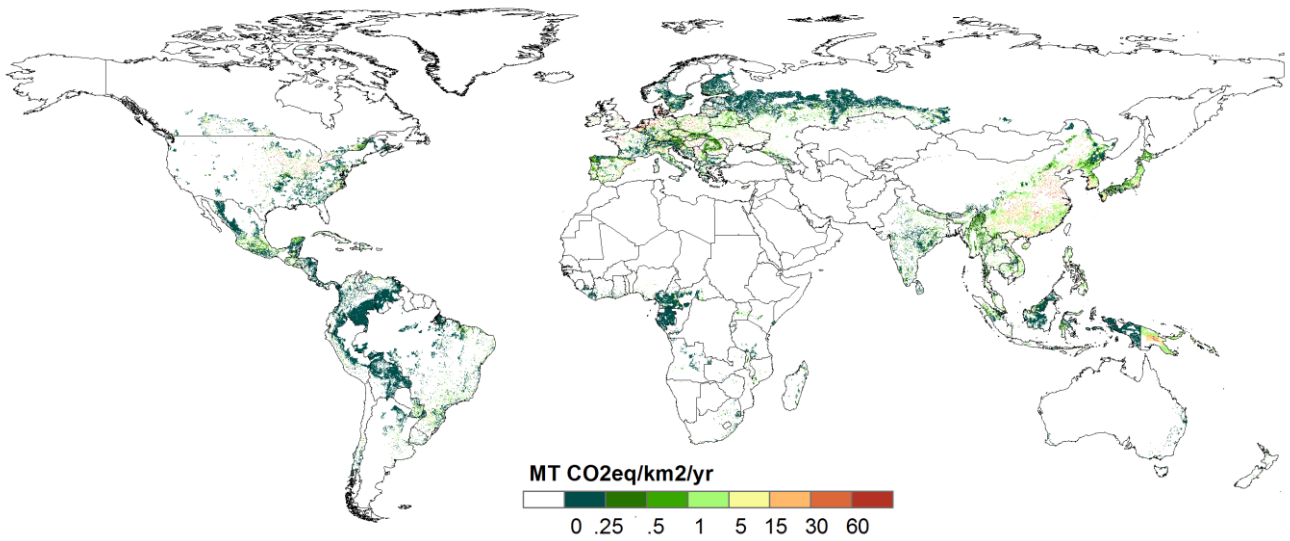

Figure S 38. Nitrous oxide emissions associated with pig meat production in the year 2000

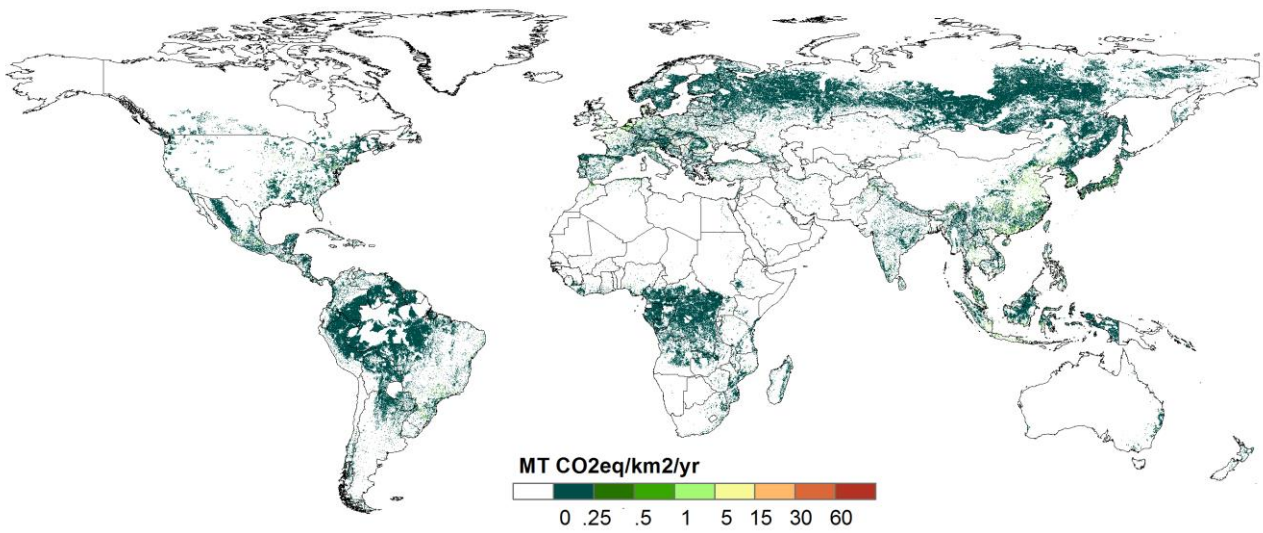

Figure S 39. Nitrous oxide Emissions associated with poultry production in the year 2000

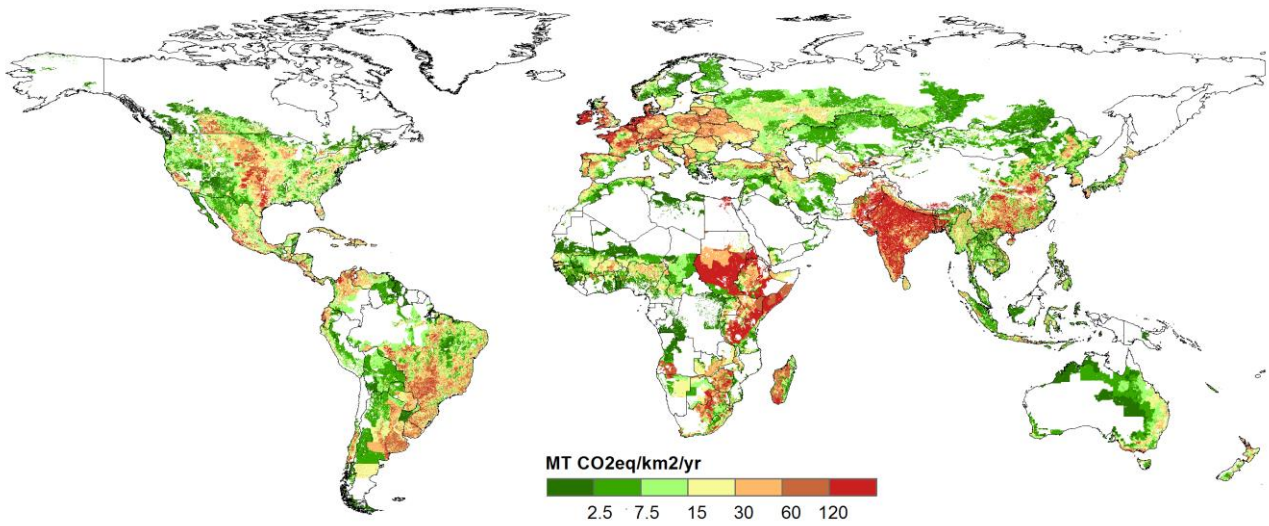

Figure S 40. Methane emissions by bovines in the year 2000

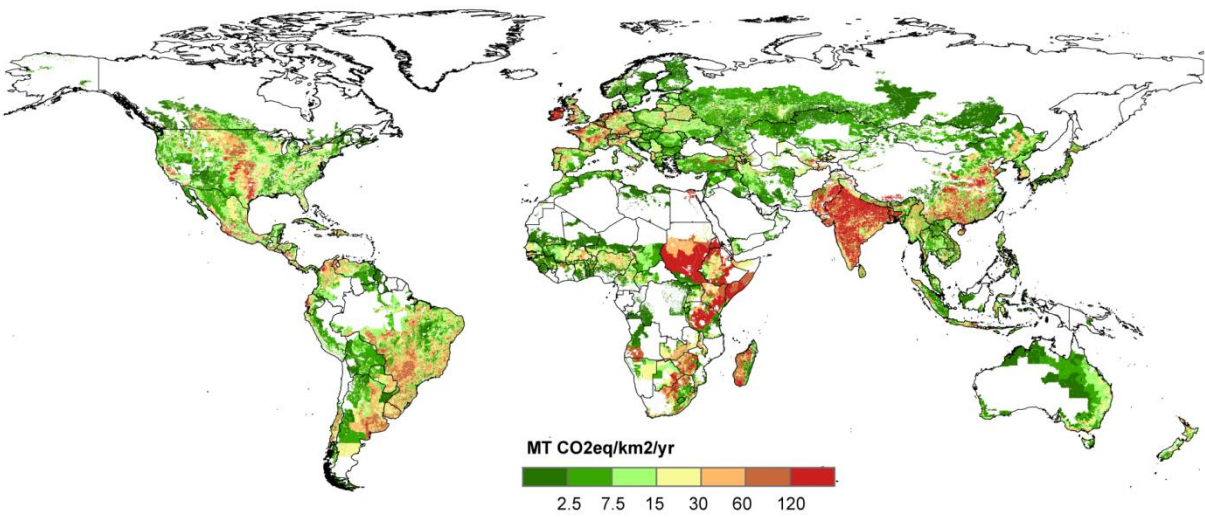

Figure S 41. Methane emission associated with bovine meat production in the year 2000

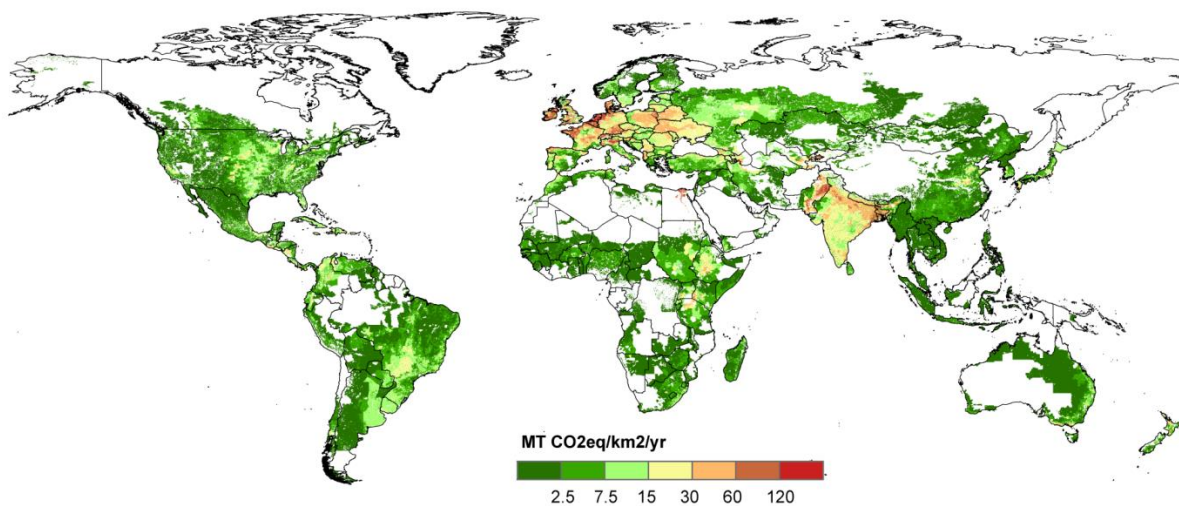

Figure S 42. Methane emissions associated with bovine milk production in the year 2000

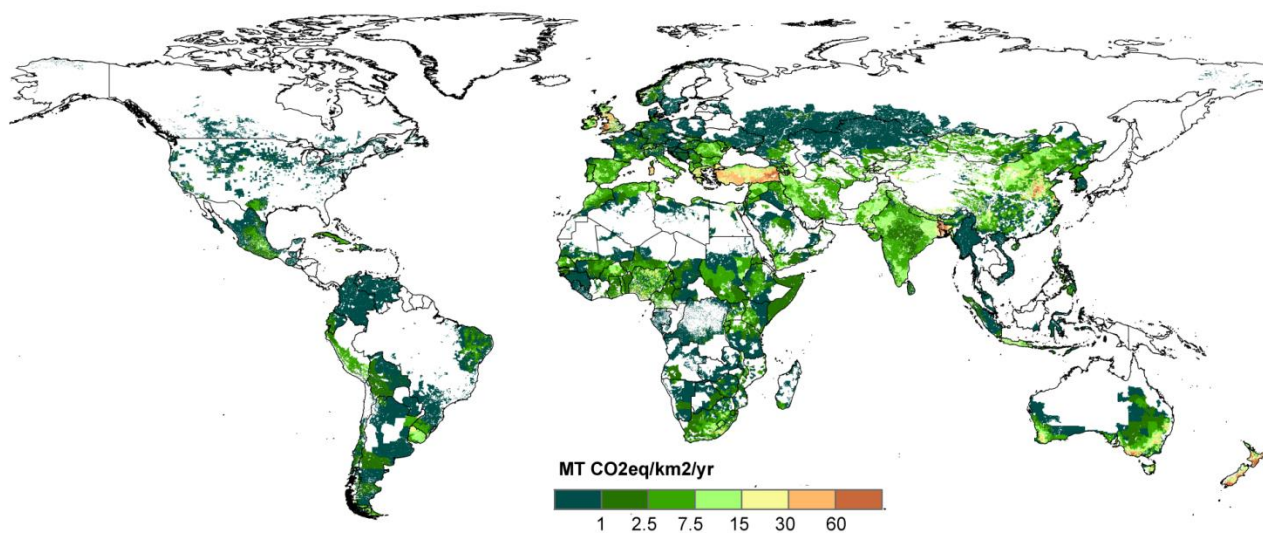

Figure S 43. Methane emissions associated with small ruminant meat production in the year 2000



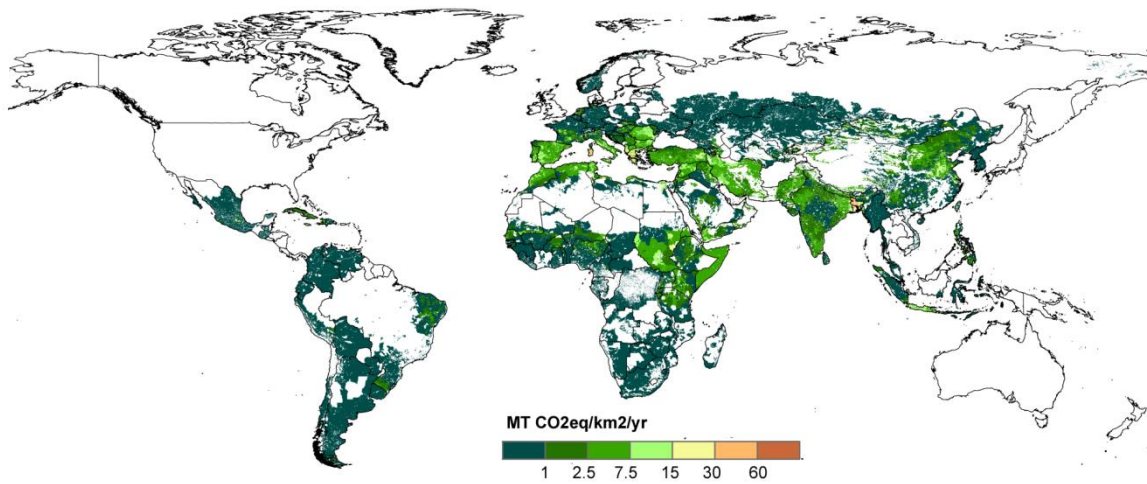

Figure S 44. Methane emissions associated with small ruminant milk production in the year 2000

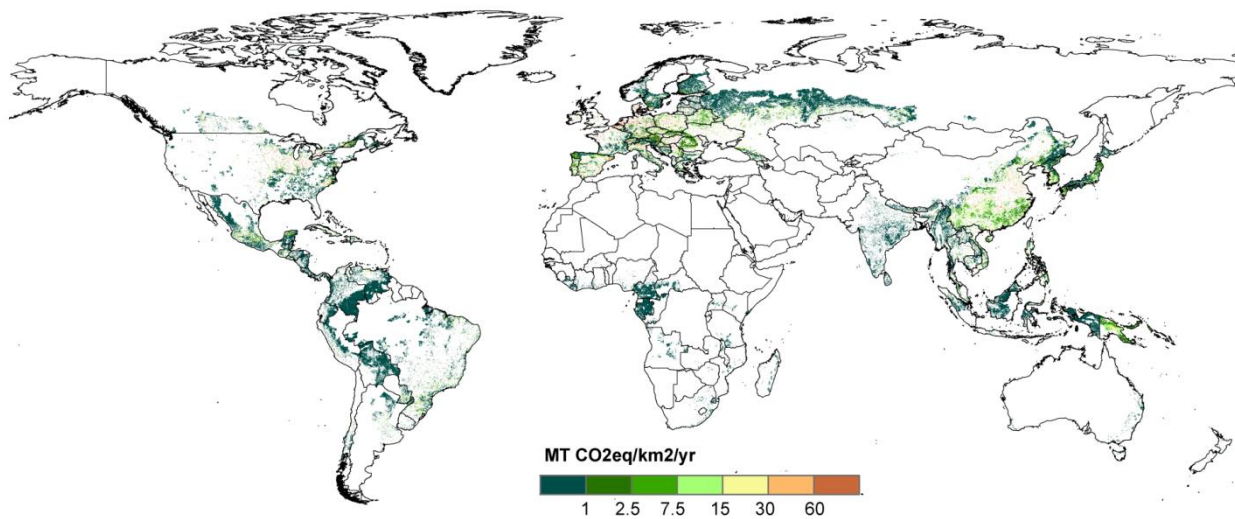

Figure S 45. Methane emissions from manure management associated with pig meat production in the year 2000

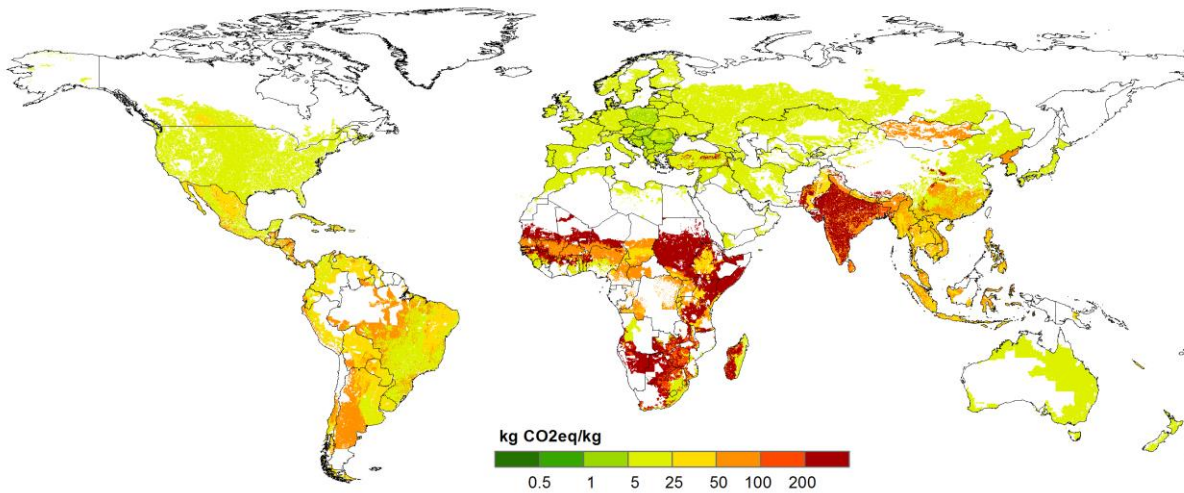

Figure S 46. GHG efficiency of bovine meat production (expressed in kg CO<sub>2</sub>eq/kg product) in the year 2000

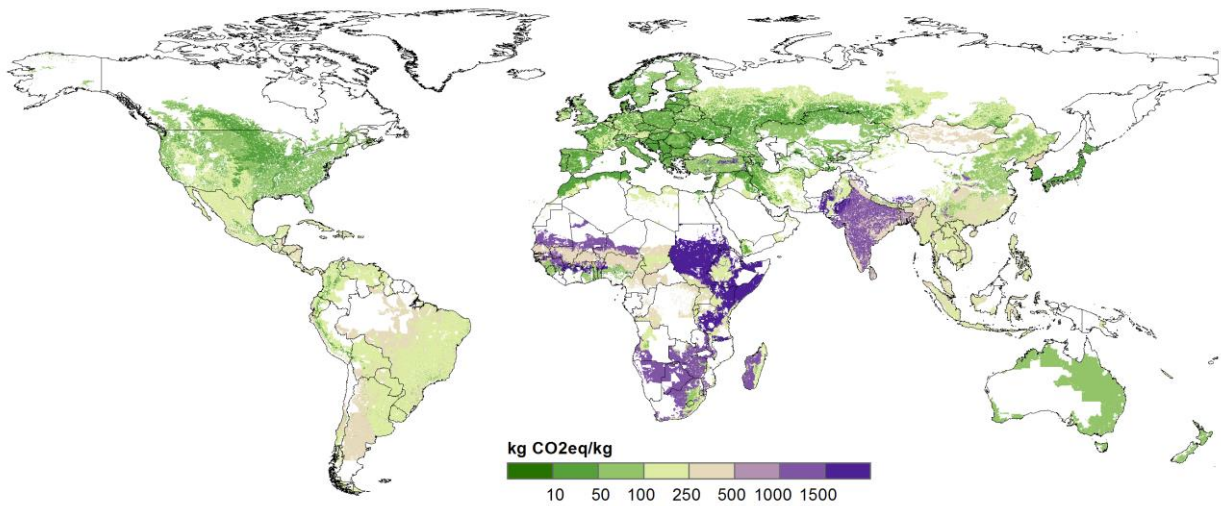

Figure S 47. GHG efficiency of bovine meat production (expressed in kg CO<sub>2</sub>eq/g protein) in the year 2000



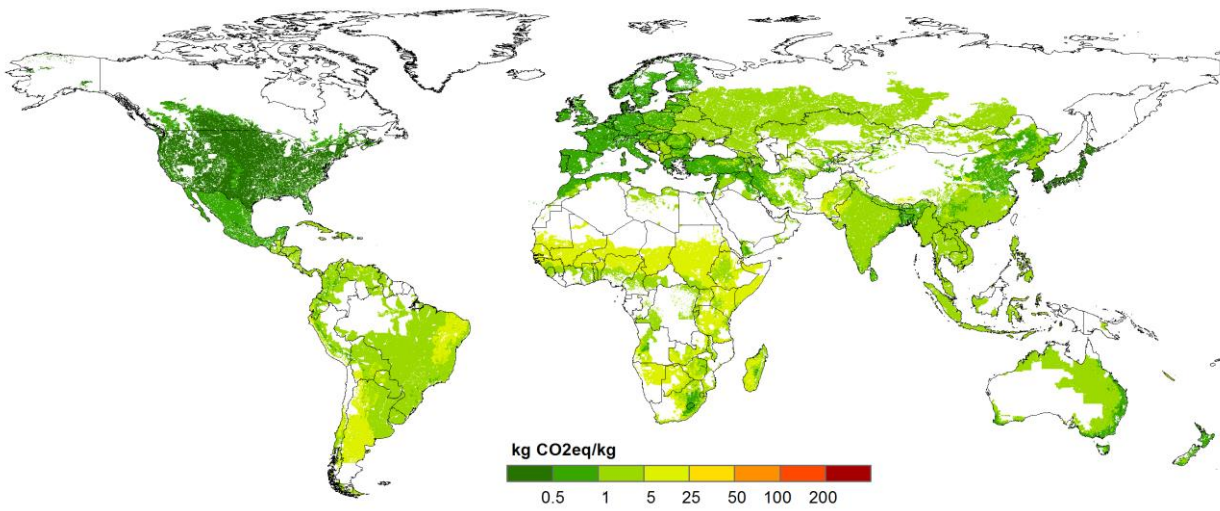

Figure S 48. GHG efficiency of bovine milk production (expressed in kg CO<sub>2</sub>eq/kg product) in the year 2000

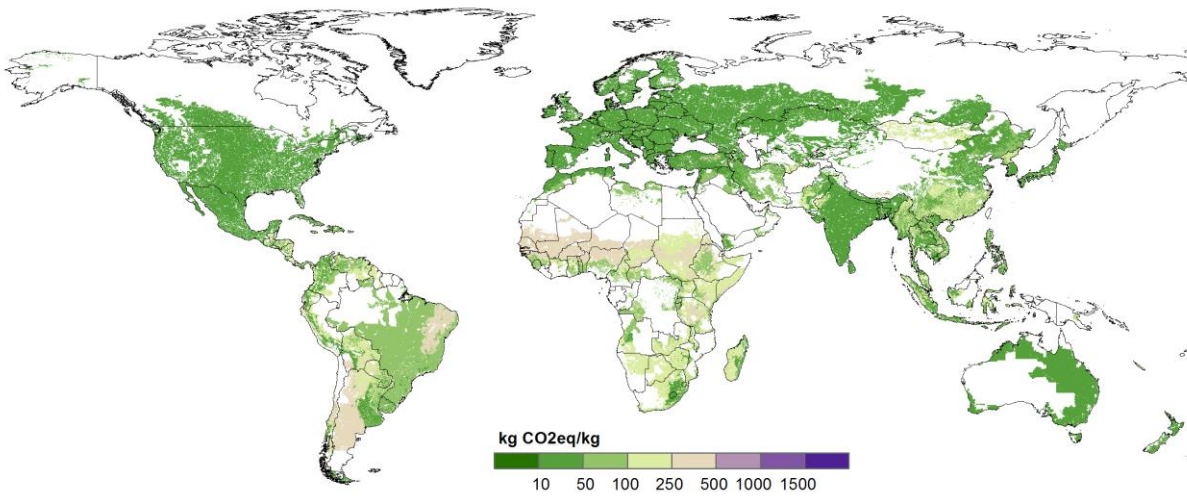

Figure S 49. GHG efficiency of bovine milk production (expressed in kg CO<sub>2</sub>eq/g protein) in the year 2000

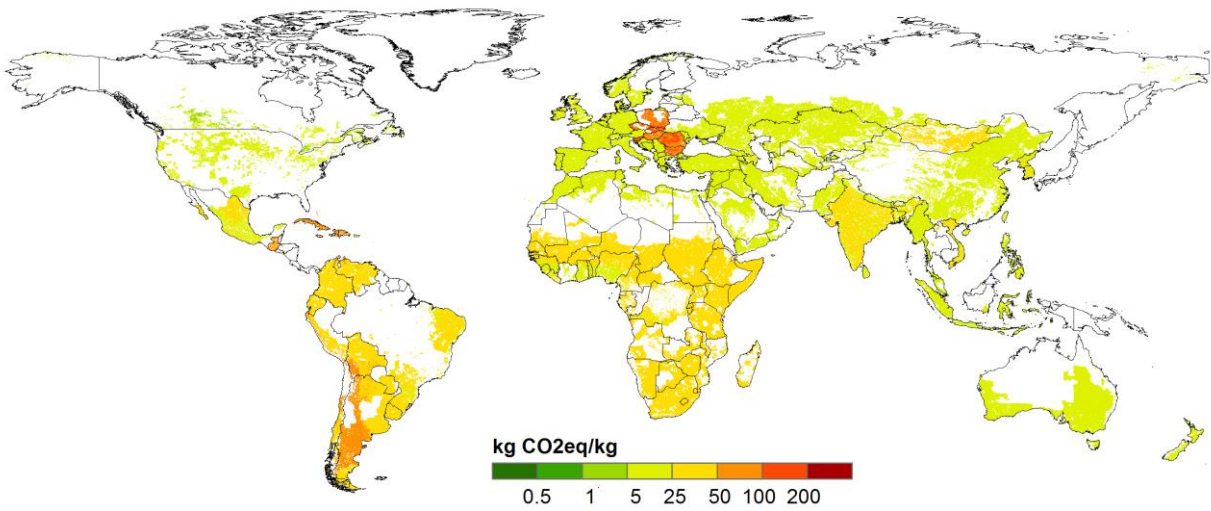

Figure S 50. GHG efficiency of small ruminant meat production (expressed in kg CO<sub>2</sub>eq/kg product) in the year 2000

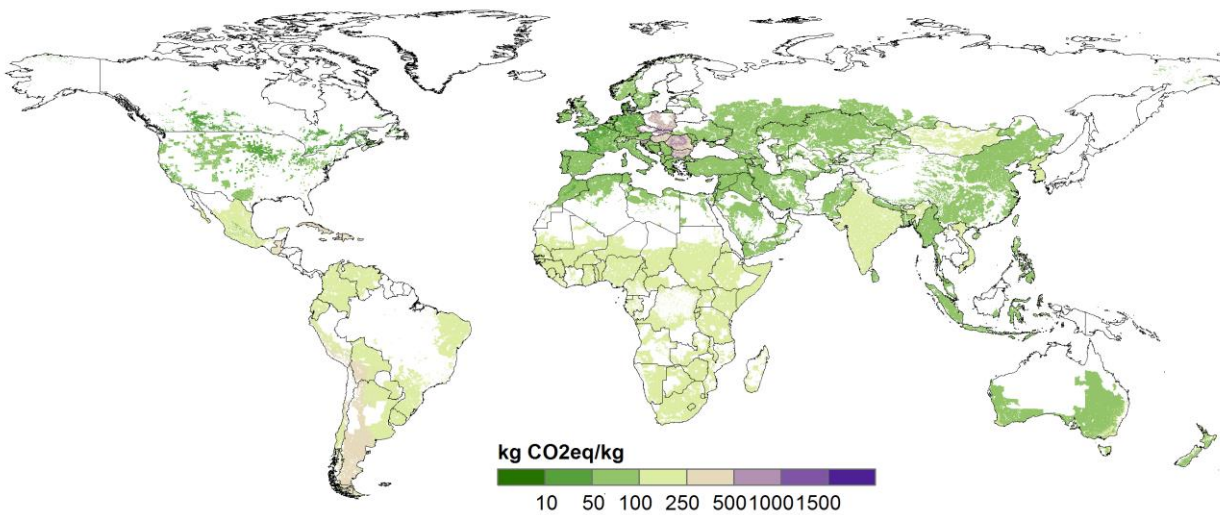

Figure S 51. GHG efficiency of small ruminant meat production (expressed in kg CO<sub>2</sub>eq/g protein) in the year 2000

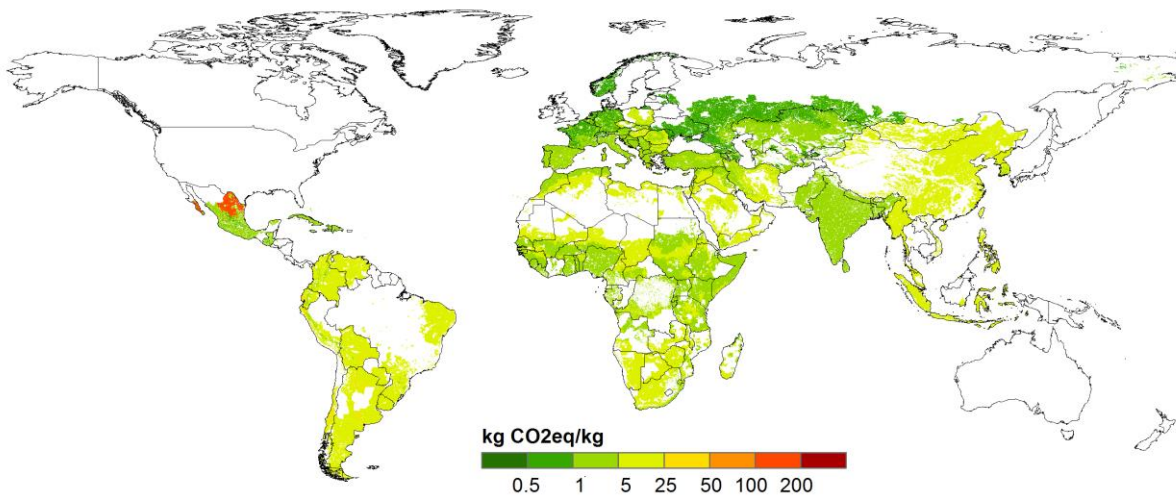

Figure S 52. GHG efficiency of small ruminant milk production (expressed in kg CO<sub>2</sub>eq/kg product) in the year 2000

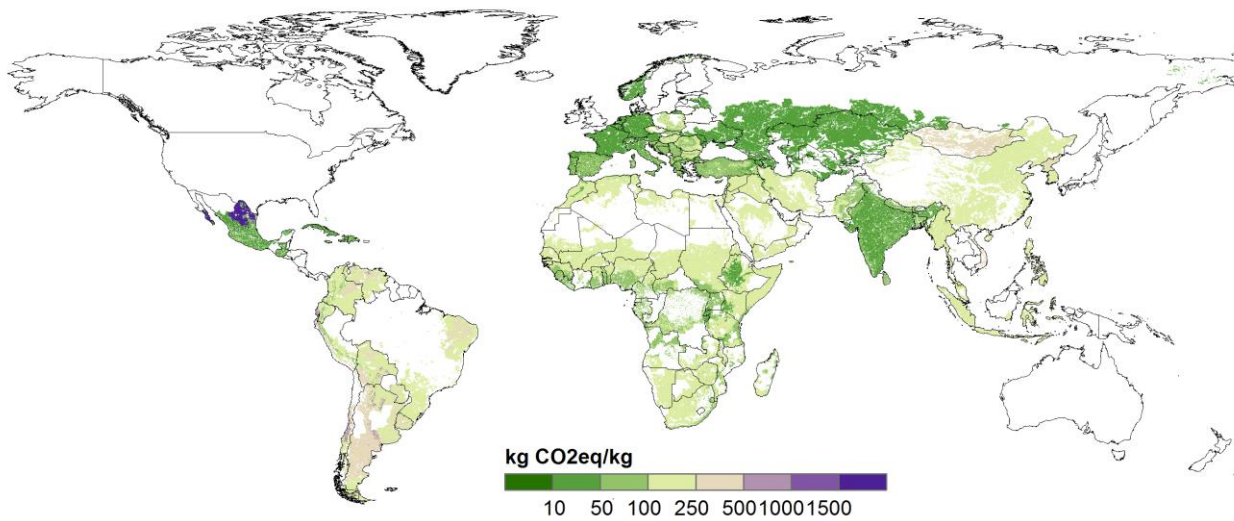

Figure S 53. GHG efficiency of small ruminant milk production (expressed in kg CO<sub>2</sub>eq/g protein) in the year 2000



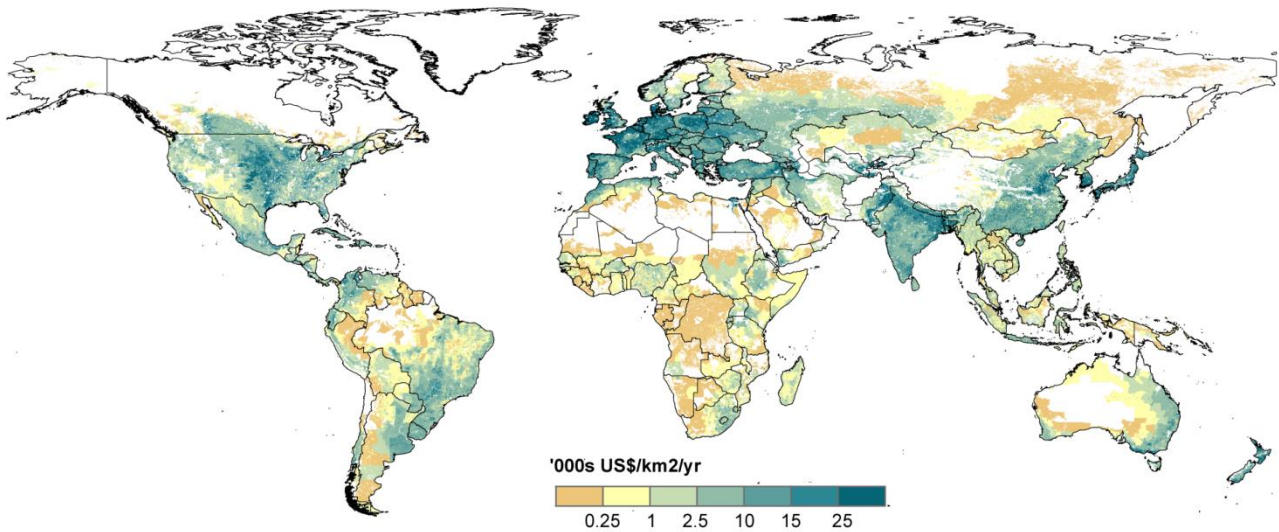

Figure S 54. Value of production of animal source foods (ruminants and monogatrics) in the year 2000

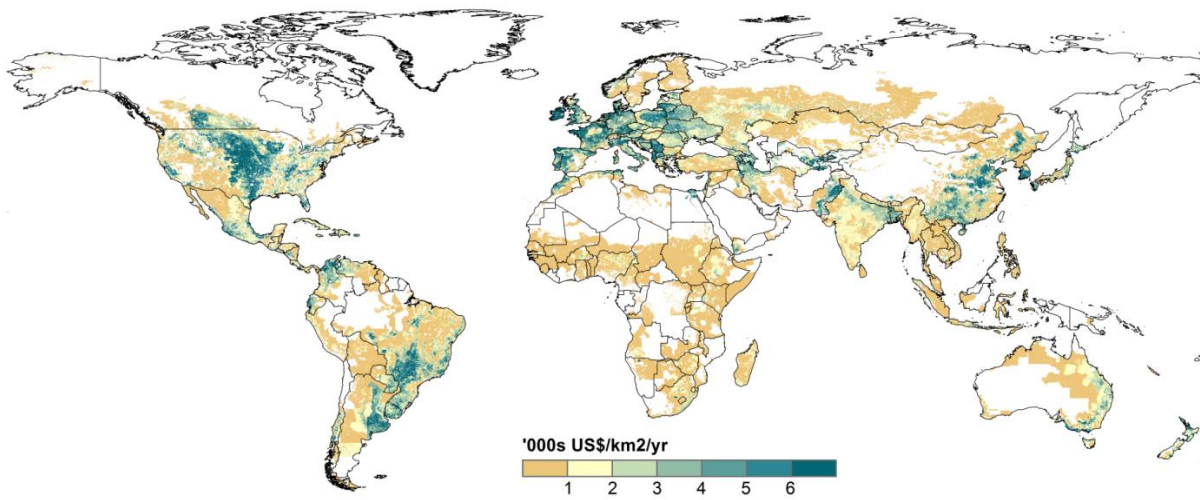

Figure S 55. Value of production of bovine meat in the year 2000

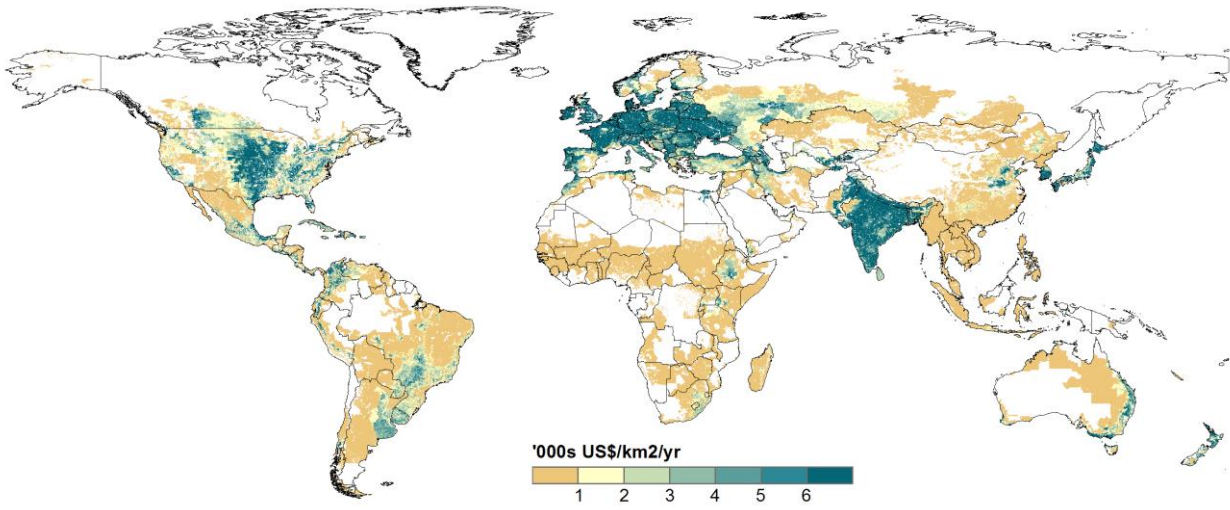

Figure S 56. Bovine milk, value of production of bovine milk in the year 2000

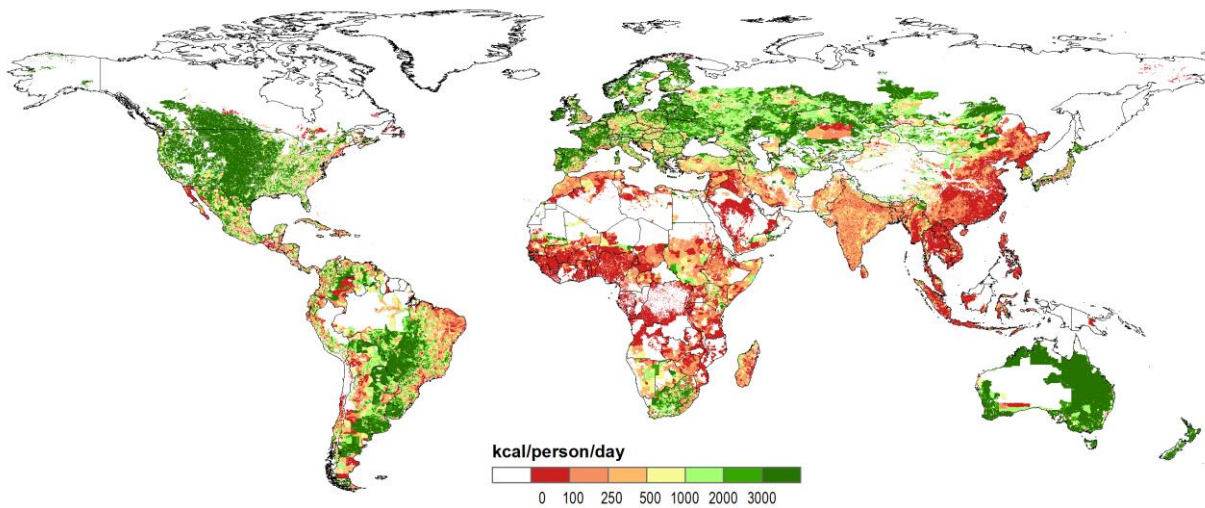

Figure S 57. Per capita nutritional value of ruminant products in the year 2000

### c. Summary tables

Table S 2. Feed consumption at the world level per animal type, system and feed type (thousands tonnes)

|                         |              | <b>Grazing</b>   | <b>Occasional</b> | <b>Stover</b>  | <b>Grains</b>    | <b>All feed</b>  |
|-------------------------|--------------|------------------|-------------------|----------------|------------------|------------------|
| <b>Cattle</b>           |              | <b>1,902,557</b> | <b>403,187</b>    | <b>520,441</b> | <b>225,987</b>   | <b>3,052,172</b> |
|                         | LGA          | 237,689          | 15,256            | 5,878          | 1,114            | <b>259,937</b>   |
|                         | LGH          | 133,285          | 13,914            | 22             | 733              | <b>147,953</b>   |
|                         | LGT          | 65,000           | 9,731             | 106            | 6,829            | <b>81,667</b>    |
|                         | MRA          | 338,742          | 150,439           | 264,856        | 38,677           | <b>792,714</b>   |
|                         | MRH          | 306,850          | 115,326           | 133,867        | 22,831           | <b>578,874</b>   |
|                         | MRT          | 296,118          | 27,590            | 76,912         | 108,861          | <b>509,481</b>   |
|                         | Other        | 408,842          | 35,283            | 24,366         | 30,543           | <b>499,034</b>   |
|                         | URBAN        | 116,030          | 35,647            | 14,434         | 16,400           | <b>182,510</b>   |
| <b>Sheeps and Goats</b> |              | <b>359,623</b>   | <b>155,940</b>    | <b>51,886</b>  | <b>59,867</b>    | <b>627,316</b>   |
|                         | LGA          | 114,538          | 9,713             | 1,278          | 8,153            | <b>133,682</b>   |
|                         | LGH          | 18,021           | 1,450             |                | 1,726            | <b>21,196</b>    |
|                         | LGT          | 14,763           | 24,393            |                | 7,047            | <b>46,203</b>    |
|                         | MRA          | 97,831           | 40,070            | 33,971         | 17,127           | <b>188,999</b>   |
|                         | MRH          | 34,935           | 15,356            | 11,504         | 5,013            | <b>66,808</b>    |
|                         | MRT          | 22,293           | 39,604            | 3,038          | 11,277           | <b>76,212</b>    |
|                         | Other        | 39,166           | 19,596            | 1,327          | 6,180            | <b>66,269</b>    |
|                         | URBAN        | 18,076           | 5,758             | 767            | 3,345            | <b>27,946</b>    |
| <b>Pigs</b>             |              |                  |                   |                | <b>537,129</b>   | <b>537,129</b>   |
|                         | Smallholders |                  |                   |                | 67,983           | <b>67,983</b>    |
|                         | Industrials  |                  |                   |                | 469,146          | <b>469,146</b>   |
| <b>Poultry</b>          |              |                  |                   |                | <b>476,329</b>   | <b>476,329</b>   |
|                         | Smallholders |                  |                   |                | 76,144           | <b>76,144</b>    |
|                         | Industrials  |                  |                   |                | 400,185          | <b>400,185</b>   |
| <b>LIVESTOCK TOTAL</b>  |              | <b>2,262,180</b> | <b>559,127</b>    | <b>572,327</b> | <b>1,299,312</b> | <b>4,692,946</b> |

Table S 3. GHG Emissions at the world level per animal type, system and GHG source (thousands tonnes CO<sub>2</sub>eq)

|                            | Manure<br>Mgt<br>CH <sub>4</sub> | Manure<br>Crop<br>N <sub>2</sub> O | Manure<br>pasture<br>N <sub>2</sub> O | Manure<br>Mgt<br>N <sub>2</sub> O | Ent. Ferm.<br>CH <sub>4</sub> | Total            |
|----------------------------|----------------------------------|------------------------------------|---------------------------------------|-----------------------------------|-------------------------------|------------------|
| <b>Cattle</b>              | <b>96,397</b>                    | <b>35,595</b>                      | <b>340,766</b>                        | <b>150,596</b>                    | <b>1,273,087</b>              | <b>1,896,441</b> |
| LGA                        | 3,777                            | 553                                | 33,354                                | 7,742                             | 118,180                       | 163,606          |
| LGH                        | 2,768                            | 1,130                              | 20,040                                | 5,204                             | 68,776                        | 97,918           |
| LGT                        | 3,071                            | 517                                | 8,176                                 | 3,848                             | 37,526                        | 53,139           |
| MRA                        | 9,745                            | 3,135                              | 81,608                                | 54,802                            | 278,807                       | 428,098          |
| MRH                        | 15,810                           | 8,888                              | 77,803                                | 16,672                            | 244,688                       | 363,860          |
| MRT                        | 33,768                           | 12,102                             | 51,507                                | 31,265                            | 217,542                       | 346,185          |
| Other                      | 19,227                           | 6,609                              | 50,800                                | 22,506                            | 227,201                       | 326,343          |
| URBAN                      | 8,230                            | 2,662                              | 17,479                                | 8,555                             | 80,367                        | 117,293          |
| <b>Sheep and<br/>Goats</b> | <b>10,436</b>                    | <b>2,038</b>                       | <b>43,543</b>                         | <b>12,446</b>                     | <b>238,344</b>                | <b>306,806</b>   |
| LGA                        | 2,431                            | 108                                | 11,464                                | 1,427                             | 52,727                        | 68,157           |
| LGH                        | 411                              | 90                                 | 1,941                                 | 245                               | 8,592                         | 11,278           |
| LGT                        | 704                              | 113                                | 3,768                                 | 1,394                             | 18,864                        | 24,842           |
| MRA                        | 3,180                            | 325                                | 14,837                                | 4,930                             | 67,484                        | 90,756           |
| MRH                        | 1,195                            | 671                                | 5,787                                 | 1,918                             | 26,149                        | 35,720           |
| MRT                        | 968                              | 732                                | 5,744                                 | 2,419                             | 28,428                        | 38,292           |
| Other                      | 1,093                            |                                    |                                       | 79                                | 25,253                        | 26,426           |
| URBAN                      | 453                              |                                    |                                       | 35                                | 10,847                        | 11,336           |
| <b>Pigs</b>                | <b>137,805</b>                   | <b>25,246</b>                      | <b>10,307</b>                         | <b>28,894</b>                     |                               | <b>202,252</b>   |
| Smallholders               | 5,483                            | 1,597                              | 10,307                                | 6,141                             |                               | 23,528           |
| Industrials                | 132,322                          | 23,648                             | 0                                     | 22,753                            |                               | 178,724          |
| <b>Poultry</b>             | <b>6,659</b>                     | <b>20,695</b>                      | <b>11,675</b>                         | <b>15,875</b>                     |                               | <b>54,903</b>    |
| Smallholders               | 2,604                            | 1,162                              | 11,675                                | 2,128                             |                               | 17,568           |
| Industrials                | 4,055                            | 19,533                             |                                       | 13,748                            |                               | 37,336           |
| <b>LIVESTOCK TOTAL</b>     | <b>251,297</b>                   | <b>196,133</b>                     | <b>533,789</b>                        | <b>316,722</b>                    | <b>1,511,431</b>              | <b>2,460,402</b> |

### 3. Livestock system efficiencies

#### a. Level of aggregation used

Table S 4. List of region used in the analysis and country mapping

| Region acronym | Data analysis level                 | Countries                                                                                                                                                                                                                               |
|----------------|-------------------------------------|-----------------------------------------------------------------------------------------------------------------------------------------------------------------------------------------------------------------------------------------|
| EUR            | EU Baltic                           | <i>Estonia, Latvia, Lithuania</i>                                                                                                                                                                                                       |
|                | EU Central East                     | <i>Bulgaria, Czech Republic, Hungary, Poland, Romania, Slovakia, Slovenia</i>                                                                                                                                                           |
|                | EU Mid-West                         | <i>Austria, Belgium, Germany, France, Luxembourg, Netherlands</i>                                                                                                                                                                       |
|                | EU North                            | <i>Denmark, Finland, Ireland, Sweden, United Kingdom</i>                                                                                                                                                                                |
|                | EU South                            | <i>Cyprus, Greece, Italy, Malta, Portugal, Spain</i>                                                                                                                                                                                    |
|                | Former USSR                         | <i>Armenia, Azerbaijan, Belarus, Georgia, Kazakhstan, Kyrgyzstan, Moldova, Russian Federation, Tajikistan, Turkmenistan, Ukraine, Uzbekistan</i>                                                                                        |
|                | RCEU                                | <i>Albania, Bosnia and Herzegovina, Croatia, Macedonia, Serbia-Montenegro</i>                                                                                                                                                           |
|                | ROWE                                | <i>Gibraltar, Iceland, Norway, Switzerland</i>                                                                                                                                                                                          |
| OCE            | ANZ                                 | <i>Australia, New Zealand</i>                                                                                                                                                                                                           |
|                | Pacific Islands                     | <i>Fiji Islands, Kiribati, Papua New Guinea, Samoa, Solomon Islands, Tonga, Vanuatu</i>                                                                                                                                                 |
| NAM            | Canada                              |                                                                                                                                                                                                                                         |
|                | United States of America (USA)      |                                                                                                                                                                                                                                         |
| LAM            | Brazil                              |                                                                                                                                                                                                                                         |
|                | Mexico                              |                                                                                                                                                                                                                                         |
|                | RCAM                                | <i>Bahamas, Barbados, Belize, Bermuda, Costa Rica, Cuba, Dominica, Dominican Republic, El Salvador, Grenada, Guatemala, Haiti, Honduras, Jamaica, Nicaragua, Netherland Antilles, Panama, St Lucia, St Vincent, Trinidad and Tobago</i> |
|                | RSAM                                | <i>Argentina, Bolivia, Chile, Colombia, Ecuador, Guyana, Paraguay, Peru, Suriname, Uruguay, Venezuela</i>                                                                                                                               |
| EAS            | China                               |                                                                                                                                                                                                                                         |
|                | Japan                               |                                                                                                                                                                                                                                         |
|                | South Korea                         |                                                                                                                                                                                                                                         |
| SEA            | RSEA OPA                            | <i>Brunei Daressalaam, Indonesia, Singapore, Malaysia, Myanmar, Philippines, Thailand</i>                                                                                                                                               |
|                | RSEA PAC                            | <i>Cambodia, Korea DPR, Laos, Mongolia, Viet Nam</i>                                                                                                                                                                                    |
| SAS            | India                               |                                                                                                                                                                                                                                         |
|                | RSAS                                | <i>Afghanistan, Bangladesh, Bhutan, Maldives, Nepal, Pakistan, Sri Lanka</i>                                                                                                                                                            |
| MNA            | Middle East and North Africa (MENA) | <i>Algeria, Bahrain, Egypt, Iran, Iraq, Israel, Jordan, Kuwait, Lebanon, Libya, Morocco, Oman, Qatar, Saudi Arabia, Syria, Tunisia, United Arab Emirates, Yemen</i>                                                                     |
|                | Turkey                              |                                                                                                                                                                                                                                         |
| SSA            | Congo Basin                         | <i>Cameroon, Central African Republic, Congo Republic, Democratic Republic of Congo, Equatorial Guinea, Gabon</i>                                                                                                                       |
|                | Eastern Africa                      | <i>Burundi, Ethiopia, Kenya, Rwanda, Tanzania, Uganda</i>                                                                                                                                                                               |
|                | South Africa                        |                                                                                                                                                                                                                                         |
|                | Southern Africa (Rest of)           | <i>Angola, Botswana, Comoros, Lesotho, Madagascar, Malawi, Mauritius, Mozambique, Namibia, Swaziland, Zambia, Zimbabwe</i>                                                                                                              |
|                | West and Central Africa             | <i>Benin, Burkina Faso, Cape Verde, Chad, Cote d'Ivoire, Djibouti, Eritrea, Gambia, Ghana, Guinea, Guinea Bissau, Liberia, Mali, Mauritania, Niger, Nigeria, Senegal, Sierra Leone, Somalia, Sudan, Togo</i>                            |



**b. Productivity results**

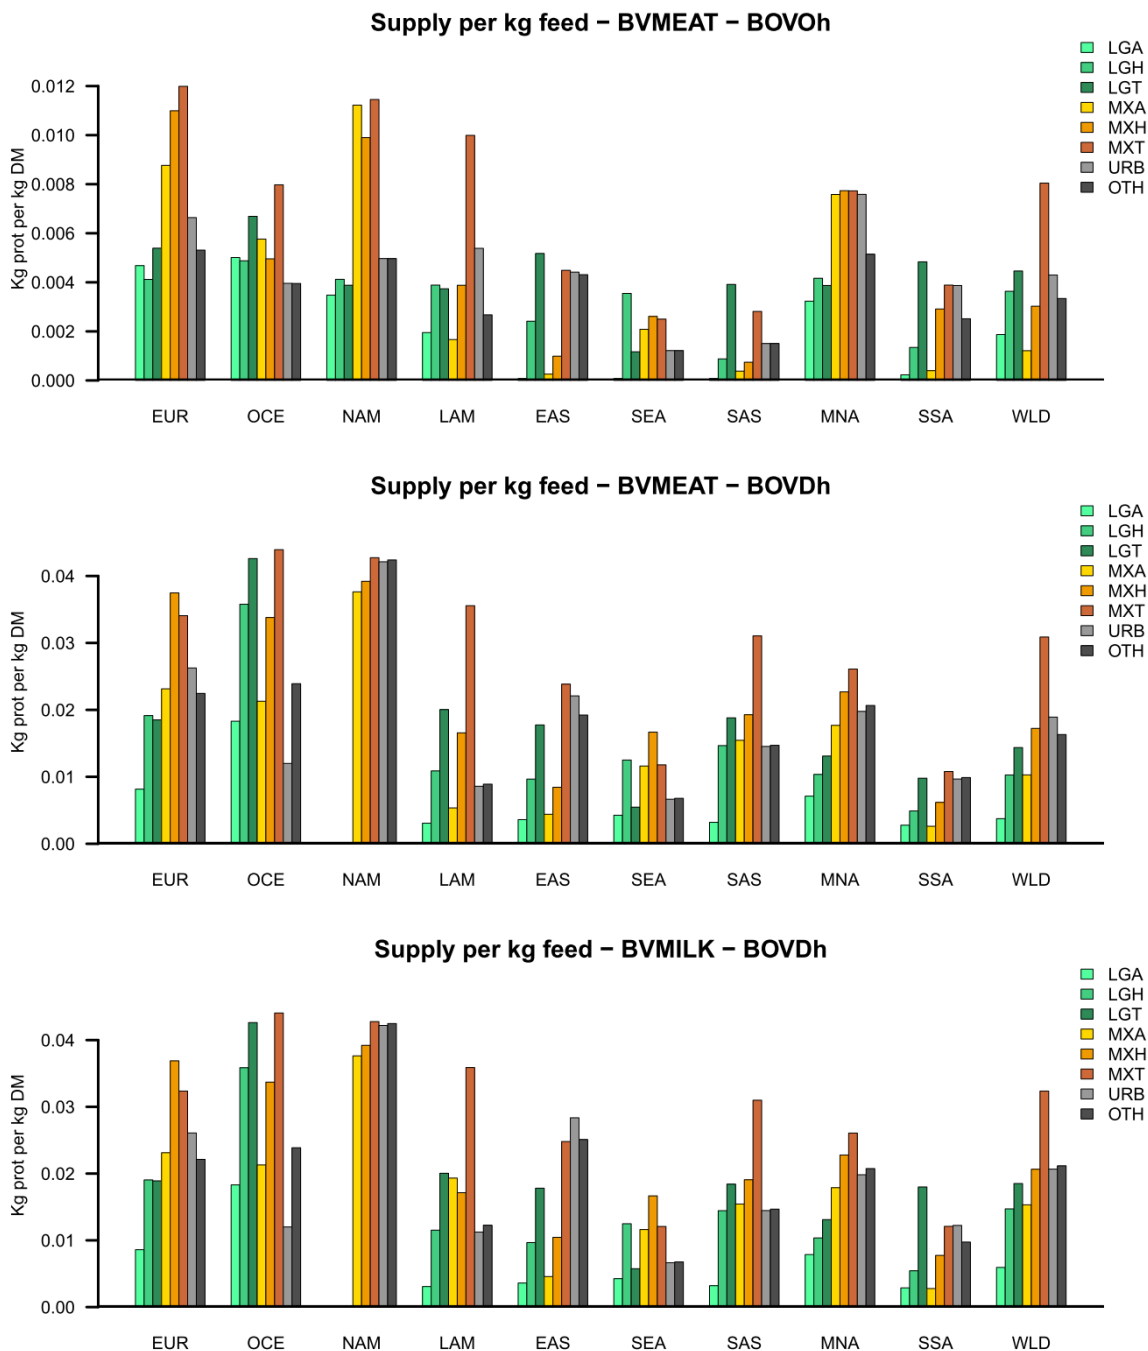

Figure S 58. Feed productivity for bovine meat from non-dairy cattle (top), meat from dairy cows (middle) and bovine milk (bottom) by systems and regions. Non-dairy cattle include here all cattle heads other than dairy cows.

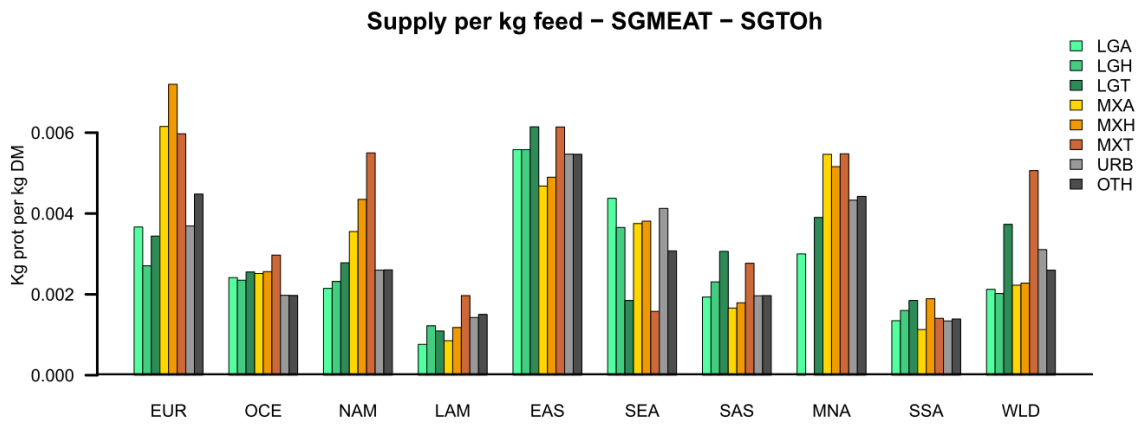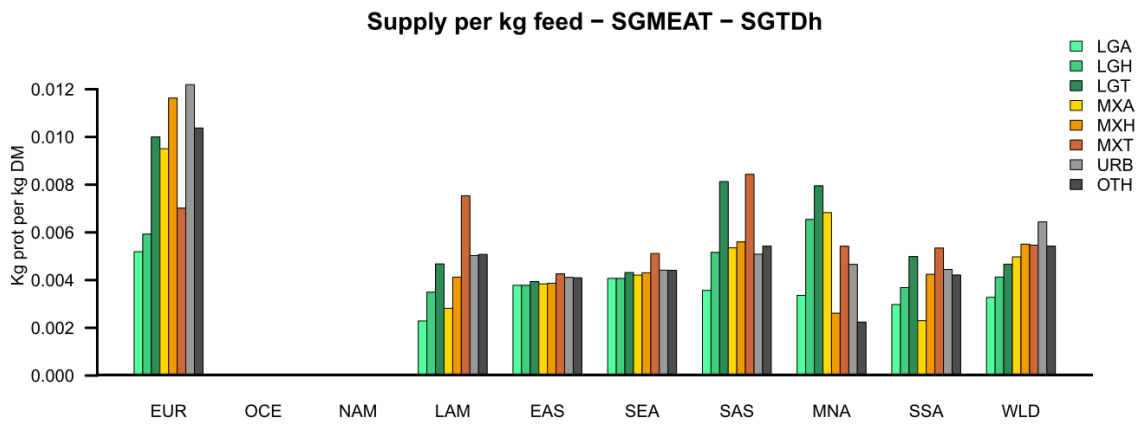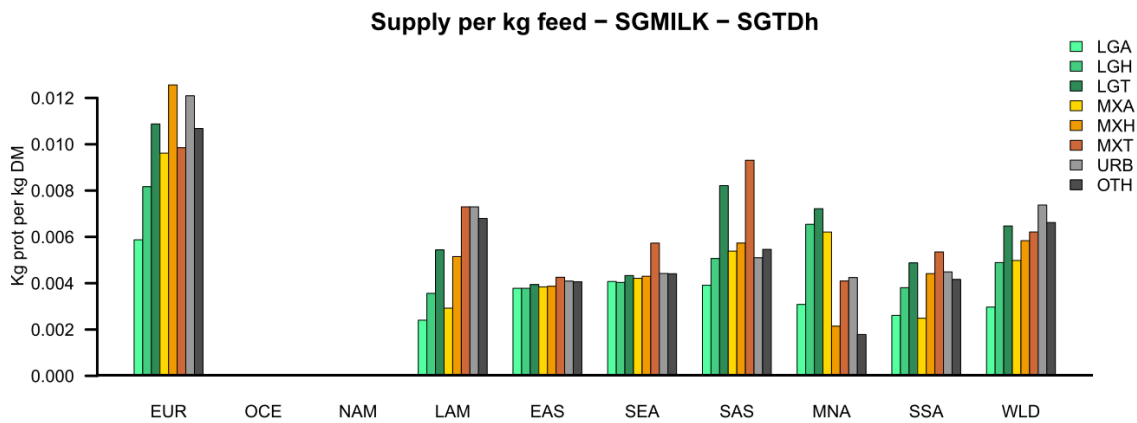

Figure S 59. Feed productivity for sheep and goat meat from non dairy herd (top), meat from dairy sheep and goat (middle) and small ruminant milk (bottom) by systems and regions.

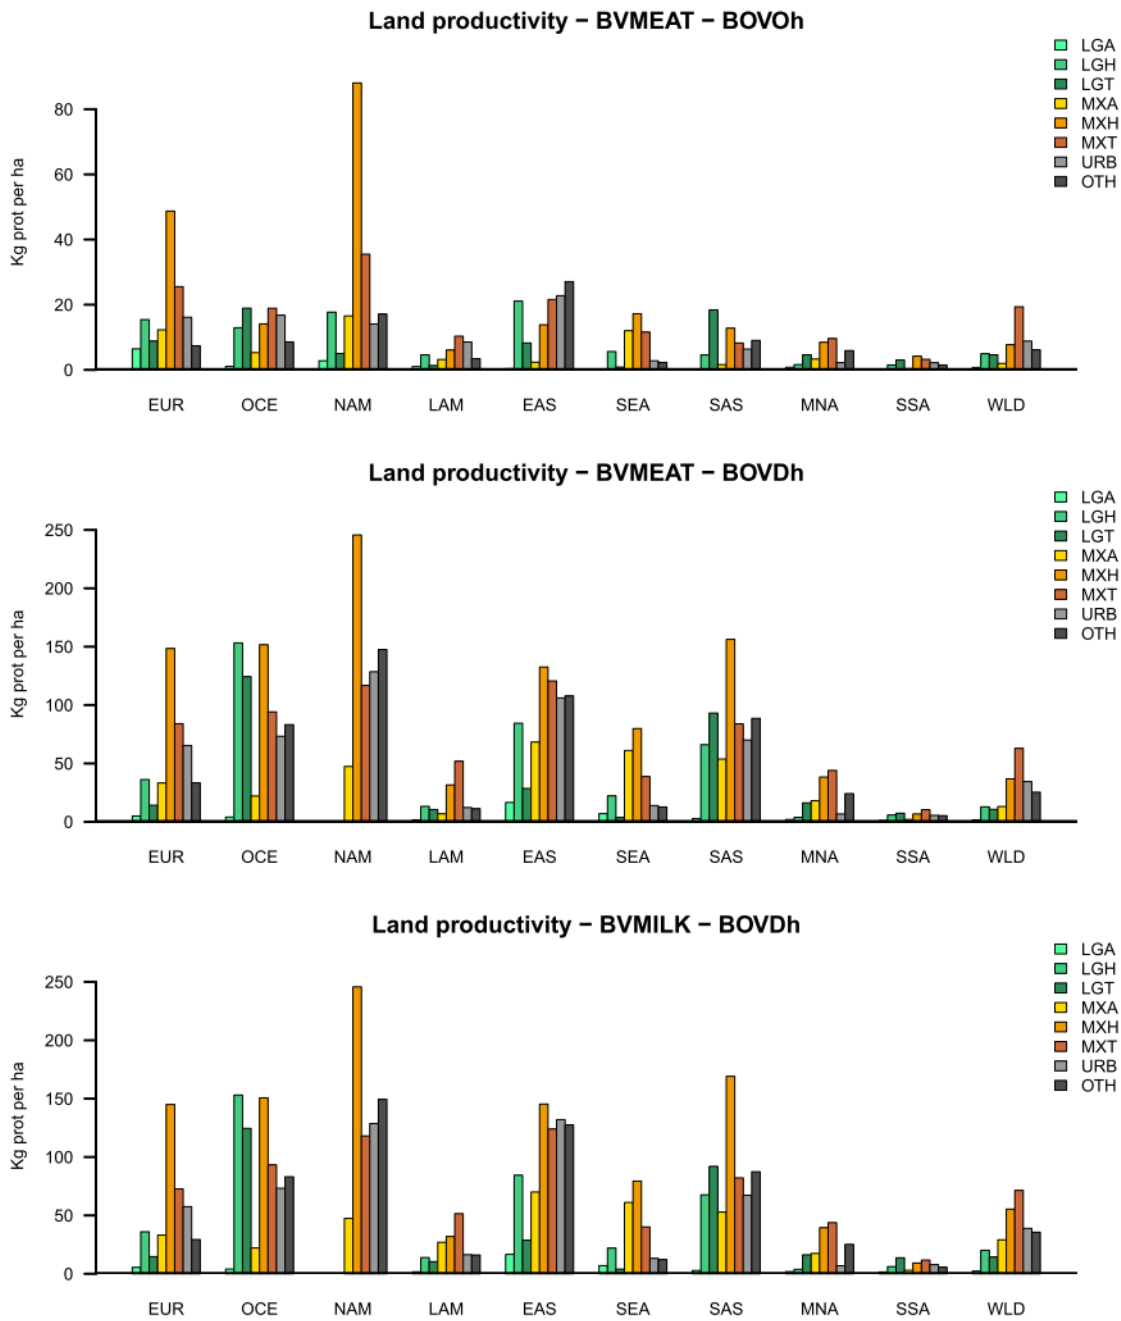

Figure S 60. Land productivity for bovine meat from non dairy cattle (top), meat from dairy cows (middle) and bovine milk (bottom) by systems and regions. Non dairy cattle include here all cattle heads other than dairy cows.

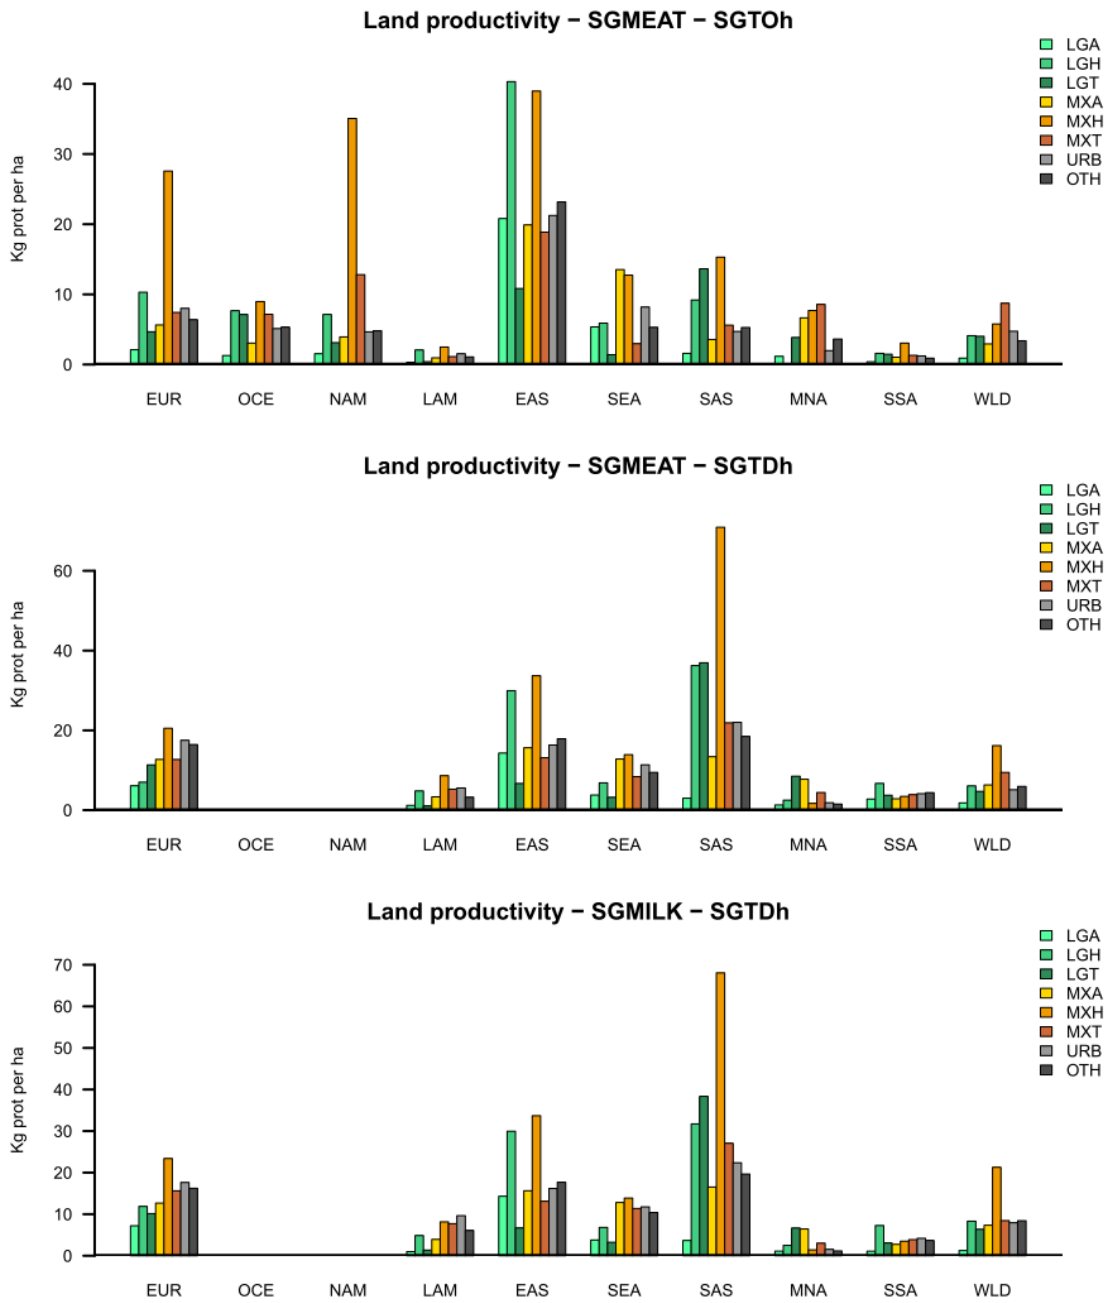

Figure S 61. Land productivity for sheep and goat meat from non dairy herd (top), meat from dairy sheep and goat (middle) and small ruminant milk (bottom) by systems and regions.

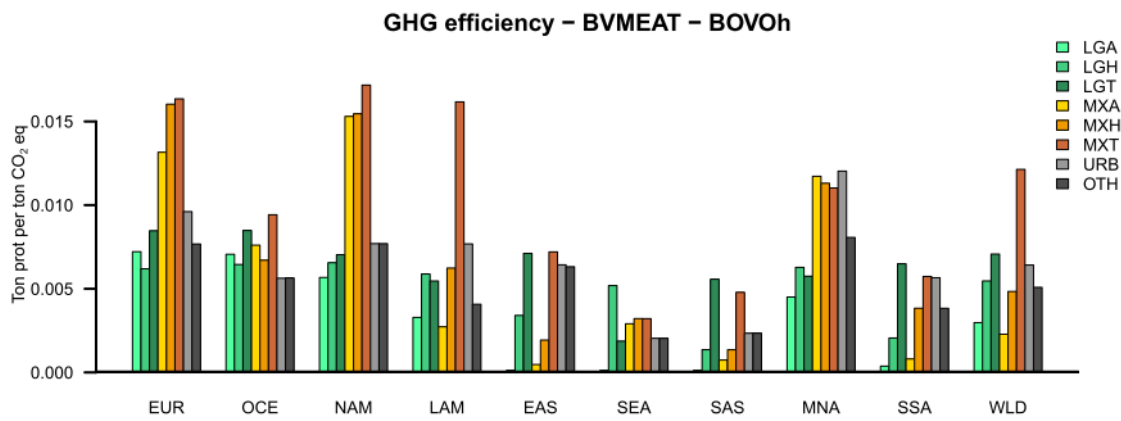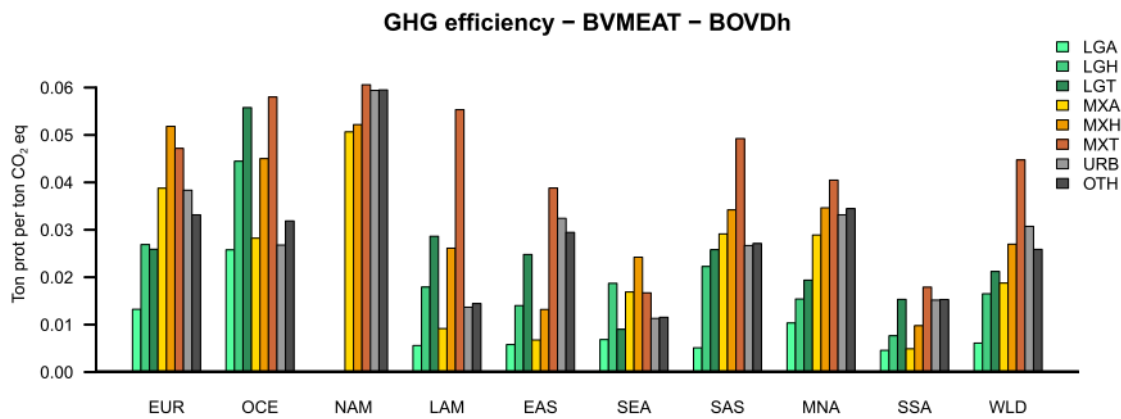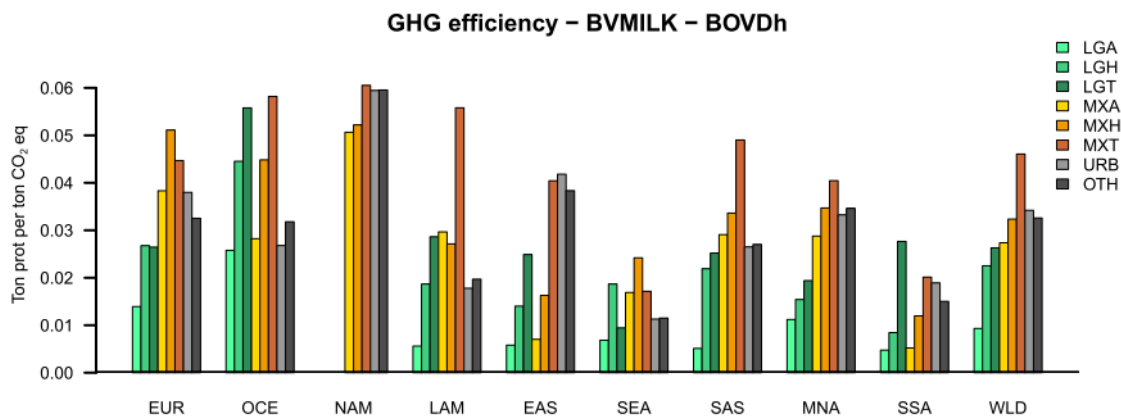

Figure S 62. GHG efficiency for bovine meat from non dairy cattle (top), meat from dairy cows (middle) and bovine milk (bottom) by systems and regions. Non dairy cattle include here all cattle heads other than dairy cows.

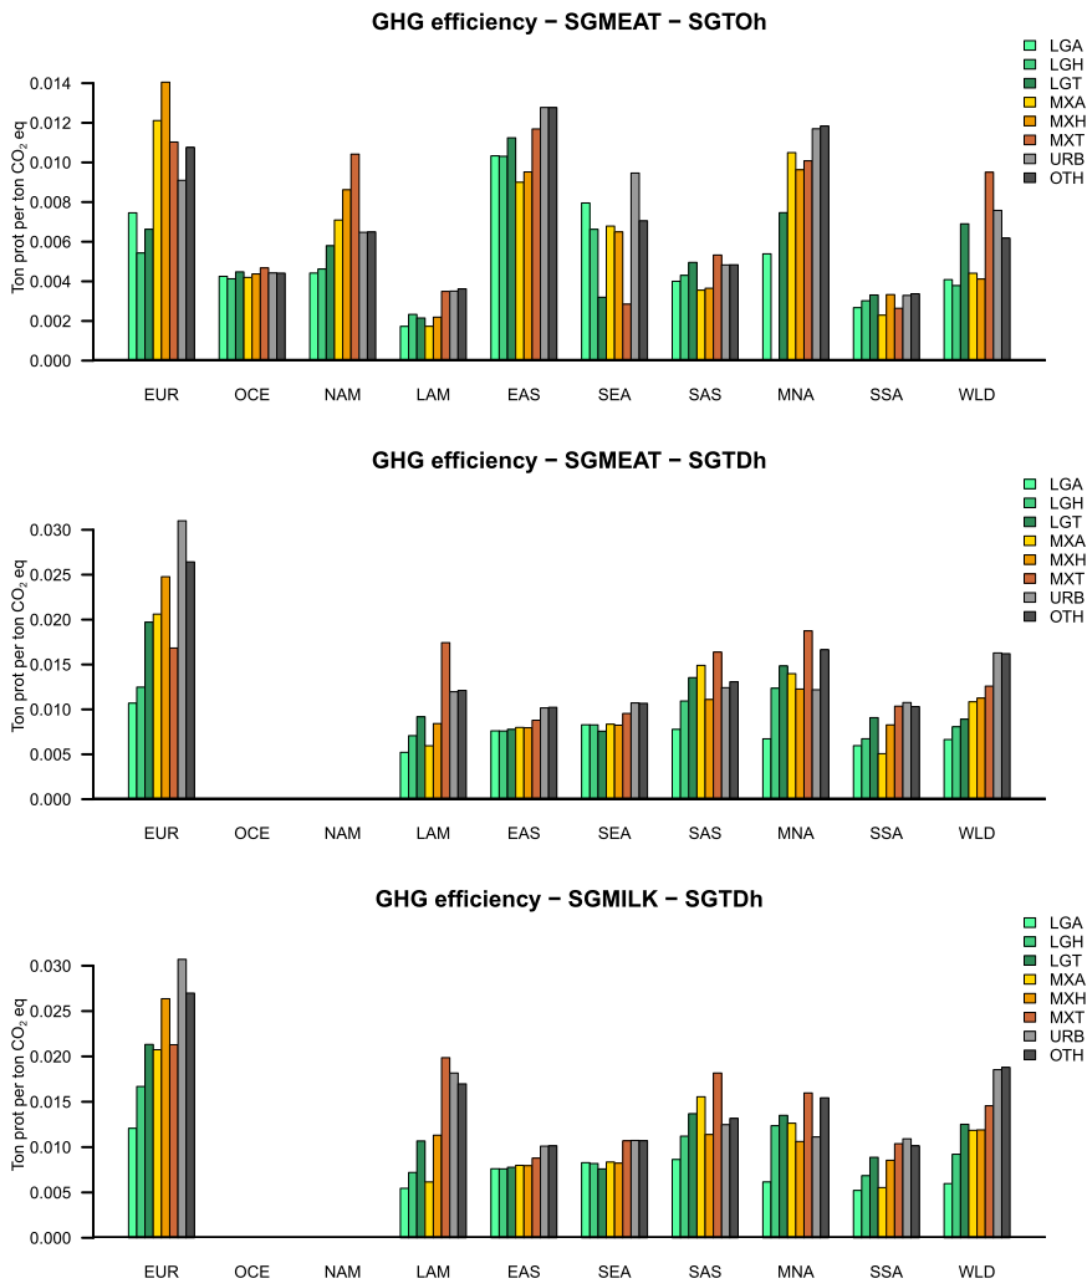

Figure S 63. GHG efficiency for sheep and goat meat from non dairy herd (top), meat from dairy sheep and goat (middle) and small ruminant milk (bottom) by systems and regions.



#### **4. Disaggregation of monogastrics into smallholder and industrial systems**

##### **a. Background**

Small farmers own 85% of the world's 525 million farms, making them numerically the most important category of farmer (9). In line with the world's population distribution, the overwhelming majority of small farms are located in Asia (87%), then Africa (8%) and Europe (4%) (10). A survey on livestock farm sizes was sent to the Veterinary authorities of all 172 member countries in 2008 and 119 responded. Veterinary authorities in developing countries estimated that 61% of all farms were small (11). This is probably an under-estimation as backyard production is often not considered as farming.

##### **b. Pig farms**

The intensive swine production system is economically viable in countries with shortage of land to grow feeds and in large cities because of availability of industrial by-products. It constitutes about 20% of total pig population raised in the third world countries whereas the traditional sector raises more than 70% of pigs (12).

Asia is the largest producer of pork in the world accounting for 55 percent of global pork production surpassing Europe (26%) and America (17%). There are varying reports on the importance of smallholder pork production in China (13). However the Chinese backyard system (farms with less than 40 pigs) which provided 73 percent of the production in 2002, had declined to 34 percent in 2010 (14), although 64% of pigs slaughtered came from farms with less than 500 pigs.

In the rest of SE Asia, large scale pig farms account for 15-20% of the total regional pig population (15). Of these, about 15% belongs to medium scale and 5% belongs to large scale (15). For example, nearly 70% of pigs in the Philippines, Vietnam, Cambodia and Laos are raised in small-scale farms (16, 17). In Vietnam, considering farms with less than 100 animals to be smallscale, these make up 95% of production (18) and models suggest industrial production will grow to meet no more than 12% of national supply in next ten years (19). In Myanmar, the percentage of smallholder production may go above 90% as commercial pig farming shares only a small portion of total pig production (20). Exceptionally, in Thailand around 80% of pigs produced are from intensive farming systems and 56% of these are from farms with over 1000 pigs (21).

India is the third largest pig producer in Asia (after China and Vietnam). The percentage of pigs under smallholders system is estimated at more than 95%, with around one third of production in the north-eastern states (20).

In most of sub-Saharan Africa, pig production is still mostly smallholder based. Pigs kept traditionally contributes about 80% of pigs kept in East Africa (Tanzania, Kenya and Uganda), 75% in Zimbabwe, 70% in Botswana, 65% in Sahel countries (Chad, Niger, Mali, Guinea Bissau, Senegal), 80% in Namibia (22, 23). For example, an estimated 80 percent of the pigs in Uganda are kept by smallholders (24), in Kenya the situation about 60 percent of the sector being smallholder based (25, 26). We used these rates to compute default continental values when country information was scarce.

### c. Poultry farms

World-wide about 69 percent of the poultry was raised in 2005 under intensive conditions (2). This is the result of a strong commercialization trend in important producing countries. For example, in Thailand over the period 1993 to 2003 the number of backyard poultries (1-20 birds) declined by 78 percent, smallholder operations (20-99 birds) by 33 percent, whereas small sized commercial operators (100-999 birds) increased by 20 percent, medium sized operation (1000-9999 birds) by 9 percent and large-scale operators (over 10,000 birds) by 72 percent (27). Also in Vietnam, the small scale commercial poultry sector is growing fast and provided in 2006 28 percent of the broiler meat, up from 20 percent in 2005 (28). Finally, the number of poultry farms in China dropped from over 100 million in 1996 to 35 million in 2005 (29). Nonetheless, the majority of poultry production is in backyard systems (with Thailand again the exception).

Although the proportion of production by smallholder farms has declined dramatically in some countries, the proportion of smallholder farms remains high. For example, in 2008 in Thailand 68% of birds are in farms with more than 10,000 birds, yet 97% of the poultry farms kept less than 100 birds (30).

With the exception of South Africa, poultry production in sub-Saharan Africa is still largely a household activity.

Approximately 80% of chicken in Africa are reared by smallholders (31). For example, in 2003 in Tanzania, 87 percent of the national flock was still kept in flocks of 1 –49 birds, with an average of 9.7 birds per household (32). In Ethiopia, 99% of the 38 million poultry population are smallholder (33).

For the developed world (Europe, North America, Oceania) it was assumed that a maximum of 10% of monogastric production came for industrial systems (34). For Latin America, this was estimated at 10-15% of total production due to its growth in the industrial monogastric sector in the last 20 years (35).

Table S 5. Percentage of Poultry in different systems in South East Asia

| Country   | Extensive/backyard | Semi-intensive | Intensive |
|-----------|--------------------|----------------|-----------|
| Laos      | 84                 | 11             | 5         |
| Myanmar   | 84                 | -              | 16        |
| Cambodia  | 65                 | 25             | 10        |
| Vietnam   | 54                 | 20             | 26        |
| Indonesia | 55                 | 45             |           |
| Thailand  | ~20                | ~10            | ~70       |

Source: (18, 27, 28, 36, 37)

Monogastrics productivities were disaggregated from FAOSTAT and using reproductive and productivity rates of pigs and poultry reported in the literature described above. Our literature review led to the development of simple rules from the data analyses to disaggregate monogastric production. First, the total production was split between the smallholder and industrial systems by calculating the relative pork and poultry yields in both systems. We used the following parameters for each species, irrespective of location, but only acknowledging differences between the systems. We acknowledge that variability in the output of industrial and smallholder systems in different countries can vary, however our objective was primarily to separate the proportion of production from the two systems in each region, and then to allocate this production to a biologically consistent number of animals, as reported in (2). For the latter we used simple spreadsheet herd and flock dynamics calculations (38).

Table S 6. Reproductive and productive parameters for pork production

| Parameters                   | Industrial | Smallholder |
|------------------------------|------------|-------------|
| No. cycles per sow per year  | 2.1        | 1.4         |
| No. piglets per birth        | 9.5        | 7.0         |
| Pre-weaning mortality /yr    | 5%         | 20%         |
| Adult mortality / yr         | 2%         | 15%         |
| Sow replacement rates / yr   | 30%        | 10%         |
| Time to market (90kg weight) | 6 months   | 9 months    |

Using the following parameters, we estimated that industrial systems produced at least 2-2.5 times the amount of pig meat per animal in the herd than smallholder systems. These estimates are conservative as our parameters reflect an industrial systems category that also included relatively small commercial operations or free range production units sometimes found in different regions.

For poultry, we estimated that industrial systems had four times the productivity of small holder systems for poultry meat, due to their higher number of cycles (8 vs 3 cycles per year, respectively for industrial and monogastric systems), their lower mortalities (5-10% vs 25-30%) and three times as high as in smallholder systems for eggs in industrial systems. Pig and poultry meat are directly calculated from the production and animal distribution across the systems. In order to remove some outliers, poultry meat yields in industrial systems are capped to 1200 kg per TLU (Tropical Livestock Unit). Only in cases, where both yields in industrial and smallholder systems of 1200 kg per TLU are not enough to match the statistics, they are allowed to go beyond this limit in both systems. In these cases also the feed requirements are adjusted proportionally. The egg yield in the industrial system is set at 15 kg per laying hen and year and the remainder of the egg production is allocated to smallholder systems. Figures Figure S 64-Figure S 67 show the percentages of production coming from the different systems and regions for the monogastric products.

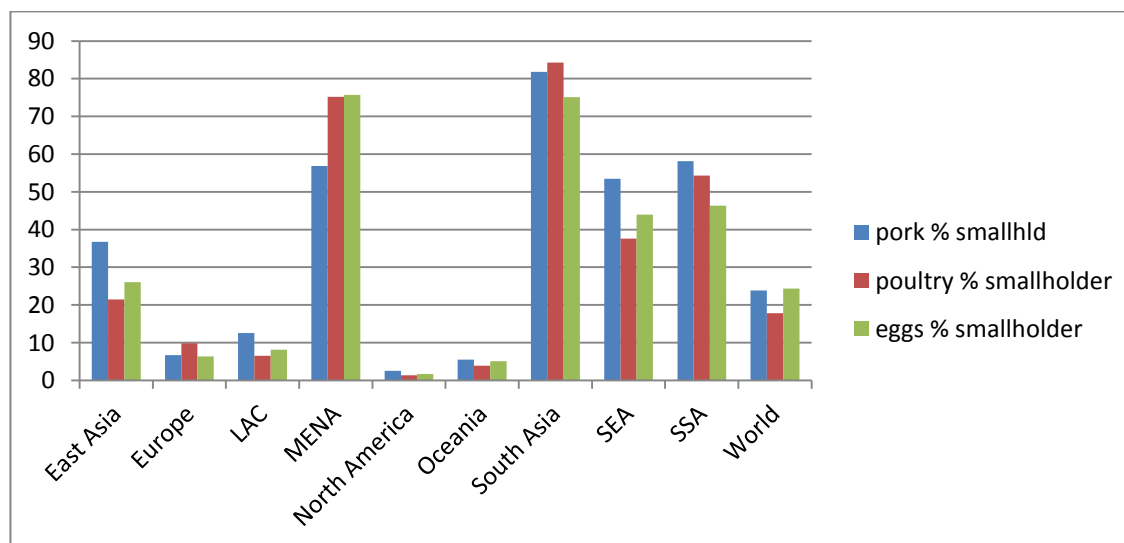

Figure S 64. Proportion of pork, poultry and eggs derived from smallholder systems in different regions.

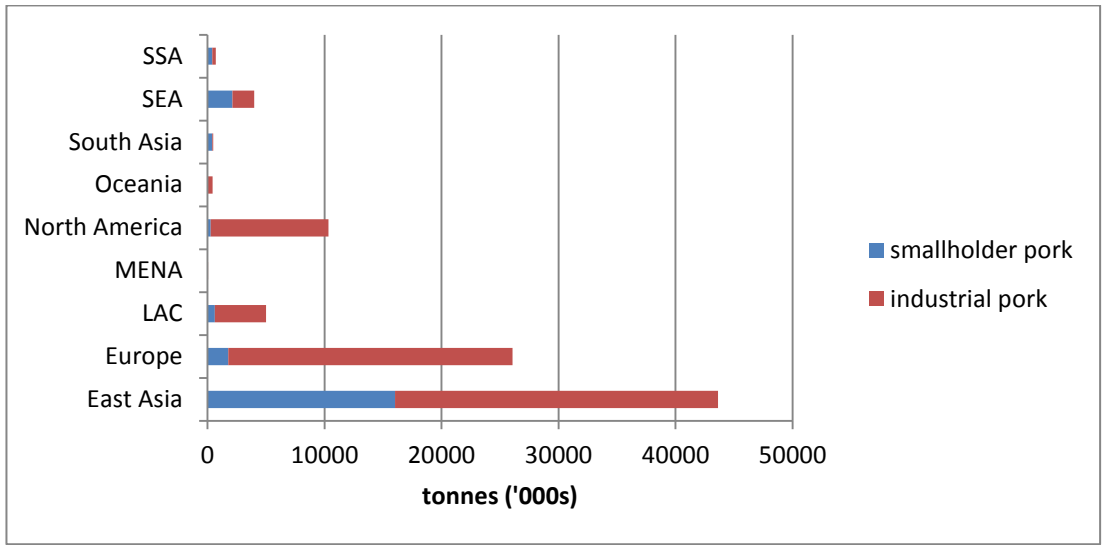

Figure S 65. Production of pork from smallholder and industrial systems in different regions

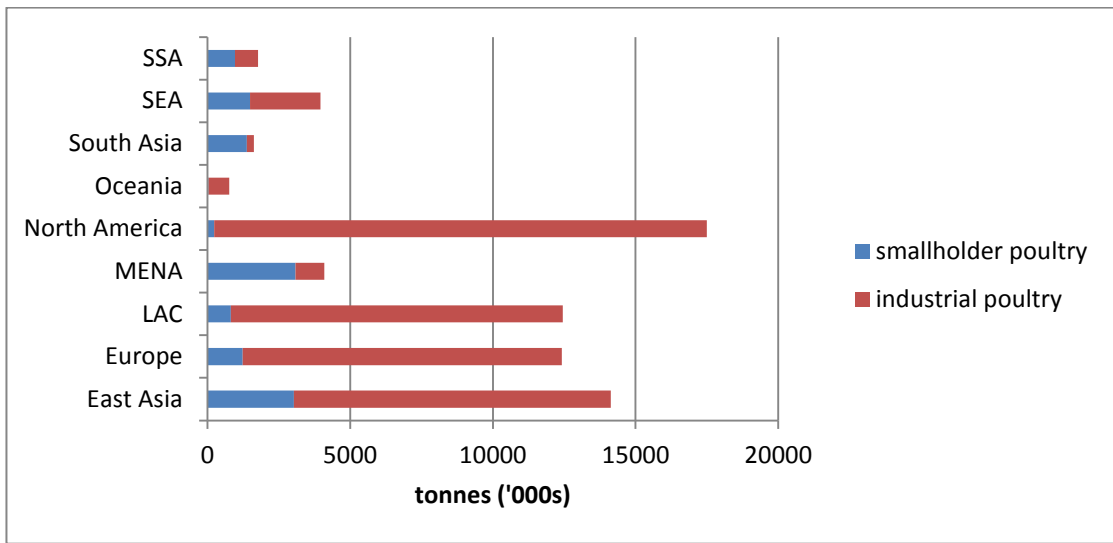

Figure S 66. Production of poultry meat from smallholder and industrial systems in different regions

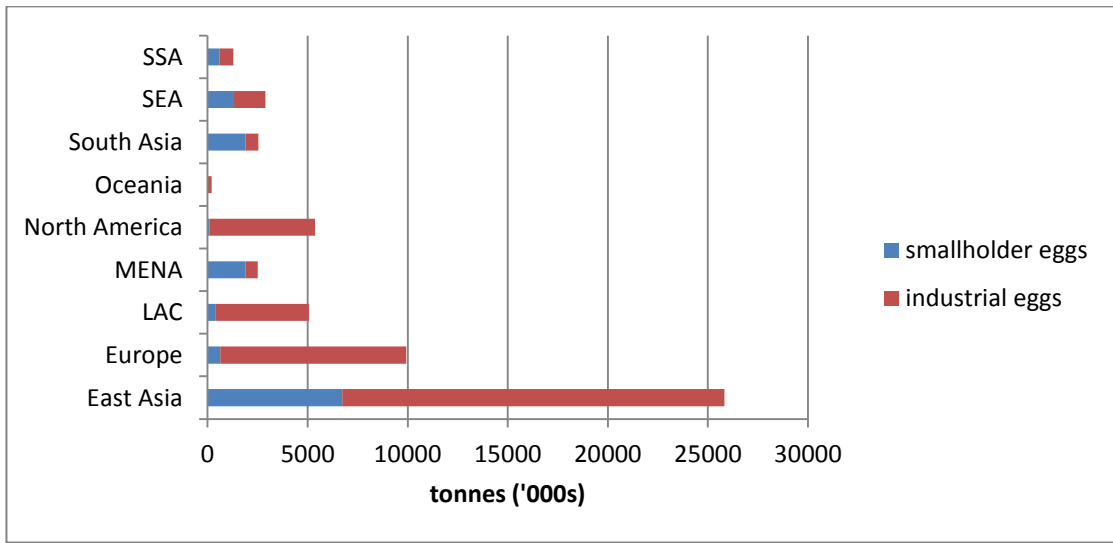

Figure S 67. Production of eggs from smallholder and industrial systems in different regions



## **5. Modelling intake, nutrient supply, excretion and methane emissions**

### **a. Model general characteristics**

The model (Ruminant, (39)), is designed to predict potential intake, digestion and animal performance of individual ruminants, consuming forages, grains and other supplements. The rationale behind the model is that a ruminant of a given body size, in a known physiological state, and with a target production level, will have a potential forage intake determined by physical or metabolic constraints imposed, both, by plant and animal characteristics. Potential forage intake is defined as the intake achievable without the constraints imposed by herbage mass, sward characteristics, or behavioural limitations (40).

The model assumes that the physically constrained rate of intake is determined by the rate of clearance of digesta from the reticulo-rumen through the processes of degradation and passage (41).

The model was largely derived from the work of Illius and Gordon (41), Cornell Net Carbohydrate and Protein System (CNCPS) (42) and UK Agriculture and Food Research Council (AFRC) (43). It is divided into two functional sections:

- 1) A nutrient supply section, which describes the flow and digestion of feeds through the gastrointestinal tract from which intake and digestibility are predicted, and from the digestion and fermentation of degraded fractions of the feed from which nutrient supply is estimated. This section consists of a series of first-order differential equations estimating intake, the pool sizes of feed fractions in the rumen, small and large intestines of the animal, the pools of digested material and excretion of indigestible residues. This section runs on an hourly basis, but results are aggregated to a day (24 h) for an appropriate coupling to the nutrient requirements section of the model. The iterative timestep of 1 h was chosen as an adequate timescale to represent digestion and passage of feeds through the gut of ruminants (42, 44-47).
- 2) A nutrient requirements section which estimates potential nutrient requirements of the animal, mainly on the basis of AFRC (43); readers are referred to this publication for a complete description of this system). The difference with AFRC, and the similarity with the CNCPS, is that the model predicts animal performance on a daily basis from the estimates of intake and nutrient supply obtained from the nutrient supply section of the model. This is a major step from requirements systems (i.e. AFRC (43), INRA (48), NRC (49, 50)), where animal performance is predicted from digestible or metabolisable energy estimates of feeds and where intake 'predictions' are obtained from linear or multiple regressions (i.e. NRC (49, 50); SCA (51); AFRC (43)). The CNCPS estimates nutrient supply from a dynamic model of digestion but still uses regression equations for intake prediction. This may reduce the flexibility and accuracy of model when extrapolating to situations beyond those used for derivation of the regression equations.

## b. Feed fractions and their digestion and passage through the gut

### Feed fractions

Feeds are described by four main constituents: ash, fat, carbohydrate and protein. Figure S 68 shows the main flows of carbohydrate and protein, which are the core of the nutrient supply section of the model. These are divided into soluble, insoluble but potentially degradable and indigestible fractions (43, 46).

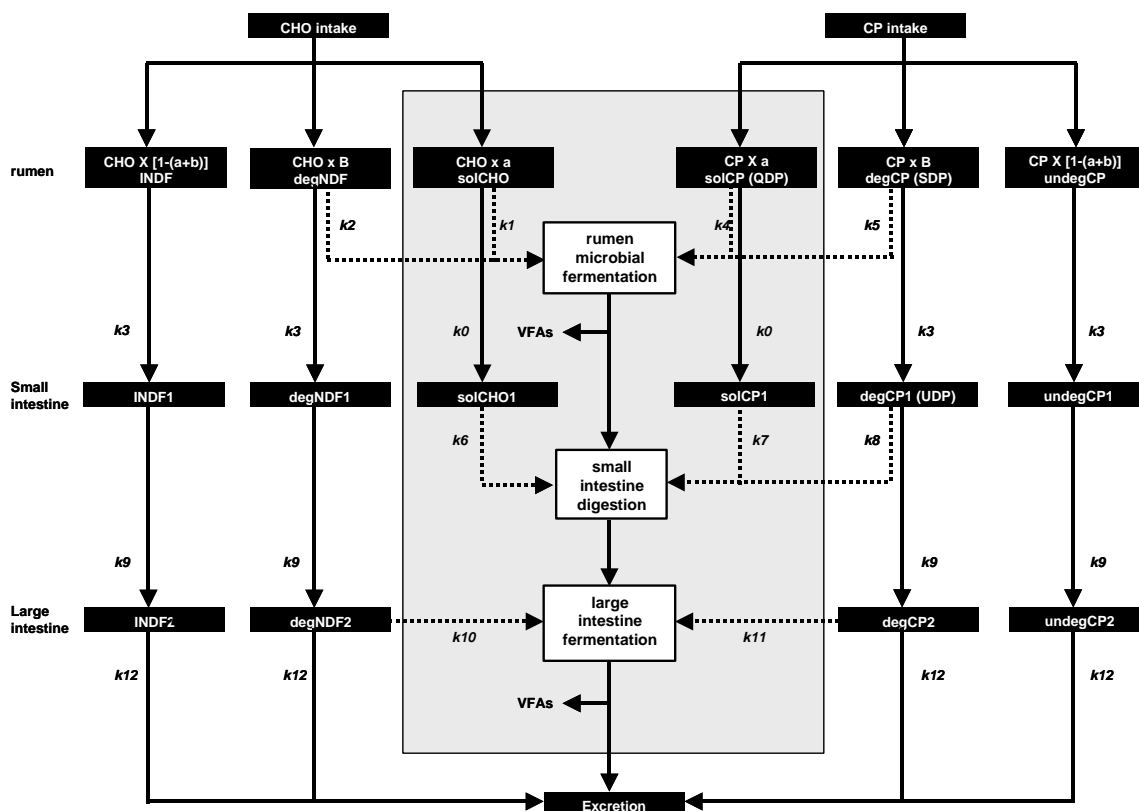

Figure S 68. General description of the model. See parameter definition in Table S 7.

Table S 7. Description of model parameters and key variables

| Parameter | Description                                                                          | Units |
|-----------|--------------------------------------------------------------------------------------|-------|
| INDF      | Pool of undegradable NDF in the rumen                                                | g/kg  |
| degNDF    | Pool of degradable but insoluble NDF in the rumen                                    | g/kg  |
| solCHO    | Pool of soluble carbohydrate in the rumen, including starch                          | g/kg  |
| undegCP   | Pool of undegradable crude protein in the rumen                                      | g/kg  |
| DegCP     | Pool of degradable but insoluble crude protein in the rumen                          | g/kg  |
| SolCP     | Pool of soluble crude protein in the rumen                                           | g/kg  |
| INDF1     | Pool of undegradable NDF in the small intestine                                      | g/kg  |
| degNDF1   | Pool of degradable but insoluble NDF in the small intestine                          | g/kg  |
| solCHO1   | Pool of soluble carbohydrate in the small intestine, including starch                | g/kg  |
| undegCP1  | Pool of undegradable crude protein in the small intestine                            | g/kg  |
| DegCP1    | Pool of degradable but insoluble crude protein in the small intestine                | g/kg  |
| solCP1    | Pool of soluble crude protein in the small intestine                                 | g/kg  |
| INDF2     | Pool of undegradable NDF in the large intestine                                      | g/kg  |
| degNDF2   | Pool of degradable but insoluble NDF in the large intestine                          | g/kg  |
| undegCP2  | Pool of undegradable crude protein in the large intestine                            | g/kg  |
| DegCP2    | Pool of degradable but insoluble crude protein in the large intestine                | g/kg  |
| k0        | Rumen liquid outflow rate                                                            | /h    |
| k1        | Rate of degradation of soluble carbohydrate in the rumen                             | /h    |
| k2        | Rate of degradation of NDF in the rumen                                              | /h    |
| k3        | Rate of passage from the rumen to the small intestine                                | /h    |
| k4        | Rate of degradation of soluble crude protein                                         | /h    |
| k5        | Rate of degradation of degradable but insoluble crude protein                        | /h    |
| k6        | Rate of degradation of soluble carbohydrate in the small intestine                   | /h    |
| k7        | Rate of degradation of soluble crude protein in the small intestine                  | /h    |
| k8        | Rate of degradation of degradable but insoluble crude protein in the small intestine | /h    |
| k9        | Rate of passage from the small to the large intestine                                | /h    |
| k10       | Rate of degradation of degradable but insoluble NDF in the large intestine           | /h    |
| k11       | Rate of degradation of degradable but insoluble crude protein in the large intestine | /h    |
| k12       | Rate of passage from large intestine to excreta                                      | /h    |

For the  $i^{\text{th}}$  feedstuff, the carbohydrate fractions represent non-structural carbohydrates ( $\text{solCHO}_i$ ), potentially digestible cell wall ( $\text{degNDF}_i$ ), and the indigestible residue ( $\text{INDF}_i$ ). For concentrate feeds, the proportion of starch in the  $\text{solCHO}_i$  is also required (42). Starch and fat in forages are almost negligible (52), but they are be important fractions in grains (53, 54).

The protein fractions described here are the same as those estimated in the metabolisable protein (MP) system proposed by AFRC (43), with the difference that their representation in this model is dynamic. For example, the pools of soluble protein ( $\text{solCP}_i$ ), degradable protein ( $\text{degCP}_i$ ) and undegraded protein ( $\text{undegCP}_i$ ) represent the terms quickly (QDP) and slowly (SDP) degraded crude protein, and undegraded (UDP) crude protein of the AFRC MP system, respectively.

The separation of dry matter into its basic chemical entities is important because different feed fractions of different forages have different degradation and passage rates (41, 55), and therefore have different digestibilities. Consequently, they supply different amounts of nutrients to the animal (56, 57). These fractionations are also important to predict effects of supplementation on the rate of cell wall digestion (58), to model protein/energy interactions (59), and to use standards of protein requirements (e.g. (43, 50, 60, 61)). Nevertheless, other authors consider that the nutritional

description of the potentially degradable carbohydrate fractions of feedstuffs requires yet further fractionations (42, 45), to account mainly for soluble fibre fractions, although there is no evidence to suggest that they provide better predictions than the approach used here (47). Additionally, the analytical costs to estimate these fractions may be too high to countenance in most situations.

### ***Forage intake and digestion and passage of feed components through the rumen***

The representation of intake, digestion and passage of feed fractions was adapted from (41). Dry matter intake (DMI) over a 24 h period is determined by the clearance of digesta from the rumen due to degradation and passage. In order to achieve an overall mean rumen load, consumption of new feed commences when rumen load falls to 70% of rumen capacity and ceases when ruminal load reaches 120% of rumen capacity (41). Sensitivity analysis showed that alterations to this threshold value for recommencing a meal did not alter the daily intake estimations from the model. The maximum rumen capacity (Maxrumen, kg DM) is determined from the bodyweight (BW) of the animal as derived by (41):

$$\text{Maxrumen} = 0.021 \text{ BW} \quad (\text{Eq. 1})$$

The rumen load (RumenDM, kg DM) is the sum of the pool sizes of the different feed fractions plus ash, and fat, across all diet ingredients, plus the microbial DM pool:

$$\begin{aligned} \text{RumenDM} = & \sum_i^i \text{solCHO}_i + \text{deg NDF}_i + \text{INDF}_i + \text{solCP}_i + \text{deg CP}_i + \text{undeg CP}_i \\ & + \text{ash}_i + \text{fat}_i + \text{MICROBES} \end{aligned} \quad (\text{Eq. 2})$$

where the pool sizes of feed constituents in the rumen are:

$$\frac{d\text{solCHO}_i}{dt} = \sum_i^i \text{Intake rate} * a\text{CHO}_i * s\text{CHO} - k_{1i} * \text{solCHO}_i - k_0 * \text{solCHO}_i \quad (\text{Eq. 3})$$

$$\frac{d \text{deg NDF}_i}{dt} = \sum_i^i \text{Intake rate} * b\text{NDF} * \text{NDF}_i - k_{2i} * \text{degNDF}_i - k_{3i} \text{degNDF}_i \quad (\text{Eq. 4})$$

$$\frac{d\text{INDF}_{1i}}{dt} = \sum_i^i \text{Intake rateINDF}_i - k_{3i} \text{INDF}_{1i} \quad (\text{Eq. 5})$$

$$\frac{d\text{SOLCP}_{1i}}{dt} = \sum_i^i \text{intake rateSCP}_i - k_{5i} \text{SOLCP}_{1i} k_{QDP} - k_0 \text{SOLCP}_{1i} \quad (\text{Eq. 6})$$

$$\frac{d\text{DEGCP}_{1i}}{dt} = \sum_i^i \text{intake rateDCP}_i - k_{6i} \text{DEGCP}_{1i} - k_{3i} \text{DEGCP}_i \quad (\text{Eq. 7})$$



$$\frac{d\text{UNDEGCP}_i}{dt} = \sum_i \text{intake rateUDCP}_i - k_3 \text{UNDEGCP}_i \quad (\text{Eq. 8})$$

The terms  $\text{CC}_i$  and  $\text{SCP}_i$  represent soluble carbohydrate and protein concentrations in the  $i$ th feedstuff, respectively.  $\text{DNDF}_i$  and  $\text{DCP}_i$  represent insoluble but degradable cell wall and CP, respectively; while  $\text{INDF}_i$  and  $\text{UDCP}_i$  are indigestible residues of cell wall and CP. All have units g/kg DM and can be estimated using the appropriate solubility (A) and potential degradability (B) coefficients from *in vitro* or *in sacco* degradation kinetics studies, as described by the standard procedures of (46, 62), or from gas production studies (63).

The fractional rate constants  $k_{1i}$  and  $k_{5i}$ , represent the digestion rates of soluble carbohydrate and protein, respectively; while  $k_{2i}$  and  $k_{6i}$  represent those of the potentially digestible cell wall and protein. Note that equation 6 contains the term  $k_{\text{QDP}}$  which is the efficiency of utilisation of soluble N (43). Rate  $k_0$  is the liquid passage rate.  $K_{3i}$  is the passage rate of the digestible cell wall fraction, which represent mostly small particles and is applied to both the digestible and indigestible fractions. Outflow of soluble protein is similar to the liquid passage rate ( $k_0$ ). Rumen passage rates of degradable and undegradable protein ( $k_{7i}$ ) are similar to the passage rates  $k_{3i}$ , (54, 64).

The model includes a lag phase ( $h$ ) before fermentation of the cell wall fraction begins. This is calculated from the model of (62) to *in sacco* or *in vitro* degradation data.

Degraded material in the rumen (RD) is accumulated in the pools of digested carbohydrate and protein. These later become the major source of energy supply to the animal:

$$\frac{d\text{RDCELLCC}_i}{dt} = \sum_i k_{1i} \text{CELLCC}_i \quad (\text{Eq. 9})$$

$$\frac{d\text{RDIGNDF}_i}{dt} = \sum_i k_{2i} \text{DNDF}_i \quad (\text{Eq. 10})$$

$$\frac{d\text{RDSOLCP}_i}{dt} = \sum_i k_{5i} \text{SOLCP}_i k_{\text{QDP}} \quad (\text{Eq. 11})$$

$$\frac{d\text{RDIGCP}_i}{dt} = \sum_i k_{6i} \text{DEGCP}_i \quad (\text{Eq. 12})$$

### *Digestion in the small and large intestines*

Feed material escaping ruminal digestion flows to the small and large intestines. Amounts of soluble carbohydrate and nitrogen escaping digestion in the rumen are small, since they are immediate nutrient sources for rumen microbes (65, 66). However, if they pass the rumen, they are subsequently fully digested in the small intestine (41, 54). In the model they are described, respectively, by:

$$\frac{dSIDCELLC1_i}{dt} = \sum_i k0CELLC1_i \quad (\text{Eq. 13})$$

$$\frac{dSIDSOLCP1_i}{dt} = \sum_i k0 \text{ SOLCP1}_i \quad (\text{Eq. 14})$$

The only components that enter the large intestines are potentially degradable and undegradable residues of carbohydrate and protein that escaped ruminal digestion, and rumen microbes. Exceptions to this rule occur with feeds, especially grain supplements, containing large proportions of bypass protein, starch or fat (43). The pool sizes of carbohydrate and nitrogen in the large intestine are:

$$\frac{dDNDF2_i}{dt} = \sum_i k3_i DNDF1_i - k2_i DNDF2_i - k4_i DNDF2_i \quad (\text{Eq. 15})$$

$$\frac{dINDF2_i}{dt} = \sum_i k3_i INDF1_i - k4_i INDF2_i \quad (\text{Eq. 16})$$

$$\frac{dDEGCP2_i}{dt} = \sum_i k3_i DEGCP1_i - k6_i DEGCP2_i (1 - k8_i) \quad (\text{Eq. 17})$$

$$\frac{dUNDEGCP2_i}{dt} = \sum_i k11_i UNDEGCP1_i - k6_i UNDEGCP2_i \quad (\text{Eq. 18})$$

where,  $k2_i$  and  $k4_i$  are the digestion and passage rates of cell wall and residues in the large intestine, and  $k8_i$  is the digestion rates of undegradable N entering the large intestine. Note that  $k2_i$  is the same for rumen and large intestine (41). All others have been previously defined. The pools of digested cell wall ( $LINDF2_i$ ) and N ( $LIDCP_i$ ) in the large intestines then become:

$$\frac{dLINDF_i}{dt} = \sum_i k_{2_i} DNDF_{2_i} \quad (\text{Eq. 19})$$

$$\frac{dLIDCP_i}{dt} = k_{1_i} DEGCP_{2_i} \quad (\text{Eq. 20})$$

The final residual compartments are:

$$\frac{dCEXCRETION_i}{dt} = \sum_i k_{4_i} INDF_{2_i} + k_{4_i} DNDF_{2_i} \quad (\text{Eq. 21})$$

$$\frac{dNEXCRETION_i}{dt} = \sum_i k_{6_i} UNDEGCP_{2_i} + k_{6_i} DEGCP_{2_i} (1 - k_{8_i}) \quad (\text{Eq. 22})$$

### ***Estimation of the rates of passage***

One of the crucial elements determining the accuracy and flexibility of the model is the estimation of the rates of passage. Passage rate estimates are not easy to find in the literature, and it would be a real disadvantage if these needed to be provided by the user of the model. The approach of (41) was chosen, since it predicts the passage rate estimates of animals of different body sizes by allometric scaling rules. This method is particularly useful for GHG inventory or LCA work because a generic description of a ruminant is provided, rates are adjusted according to animal size, and fundamentally, they are predicted from easily collectable observations.

However, the model does not consider explicitly particle dynamics and a simpler model was derived from (41). This simpler description is a summary model, and was obtained by implementing the model from (41), and calculating independently the contribution of large particles and small particles to passage of their proportional rumen dry matter contents. According to (41), the proportion of large particles entering the rumen is 0.66 and the rest are small particles. Since large particles are also comminuted to small particles, their real contribution to passage is small (67). Therefore the composite passage rate was inherently corrected for comminution and reflected largely the passage rate of the small particles. The model was run for bodyweights from 50 - 800 kg and for INDF concentrations of 0.2 - 0.6. The results demonstrated that a composite passage rate of  $0.95 \cdot k_3$  gave quite similar intake results to the original model. The effects of bodyweight and INDF on large particle passage rate were very small (the coefficient changes from 0.94 - 0.96, since the largest effects were absorbed in the comminution-corrected passage of small particles. The same allometric equations for estimating body size effects on passage were used.

For example, whole tract mean retention time (MRT, h) is scaled to body weight by the equation:

$$MRT = 14.1BW^{0.27}, r^2=0.76 \quad (\text{Eq. 23})$$

The rumen ( $k_{3i}$ ) and large intestine ( $k_{4i}$ ) passage rates of small particles of digestible cell wall are then estimated from the MRT as:

$$k_{3i} = \frac{1}{0.75\text{MRT}} + \text{FLscaling} \quad (\text{Eq. 24})$$

$$k_{4i} = \frac{1}{0.2\text{MRT}} \quad (\text{Eq. 25})$$

Feeding level affects ruminal passage rates of carbohydrate and protein fractions (42, 43, 68). Feeding level effects on passage rates were not estimated in (41). Therefore, a scaling rule for feeding level (FLscaling) was derived from the data of (42) and applied to the predicted passage rates:

$$\text{FLscaling} = 0.25\text{FL}k_i \quad (\text{Eq. 26})$$

where FL = feeding level expressed as multiples above maintenance and  $k_i$  the rate constant predicted by the model, to be scaled.

The liquid passage rate ( $k_0$ ) was estimated from the composition of the basal forage diet and the body weight of the animal as:

$$k_0 = (-0.0487 + 0.176\text{CC}_{\text{forage}} + 0.145\text{DNDF}_{\text{forage}} + 0.0000231\text{BW}) + \text{FLscaling} \quad (\text{Eq. 27})$$

For concentrate feeds, the model estimates the rates of passage as described by (42) from the equivalent rates for the basal forage diet ( $k_{i\text{forage}}$ ). This applies to rates  $k_{3i}$  and  $k_{4i}$ , and the equations have the following form:

$$k_i = [-0.424 + (1.45 * (k_{i\text{forage}} * 100))] / 100 \quad (\text{Eq. 29})$$

where  $k_i$  is the respective rate to be calculated.

### ***Microbial growth and nutrient supply from digested feed fractions***

The pools of digested nutrients obtained from the model were used to calculate the supply of nutrients, namely metabolisable energy (ME) and protein (MP), to the animals. The model takes as inputs the quantities of fermentable nutrients available in a particular timestep and returns as outputs the products of fermentation. The inputs are (i) fermentable carbohydrate separated into simple sugars, starch and cell wall material, (ii) fermentable nitrogen separated into ammonia and protein and (iii) lipid, each summed across the various feed constituents, together with the microbial pool size. The outputs are the quantities of new microbial matter, the individual volatile fatty acids acetate, propionate and butyrate, methane, ammonia and unfermented carbohydrates.

It is assumed that there is only a single pool of microorganisms of fixed composition (69). The microbial maintenance requirement was set at 1.63 mmoles ATP per g of microbial dry matter per



hour (59). The requirements of nutrients for microbial growth were taken from (59). An outline of the processes described is shown in Figure 2.

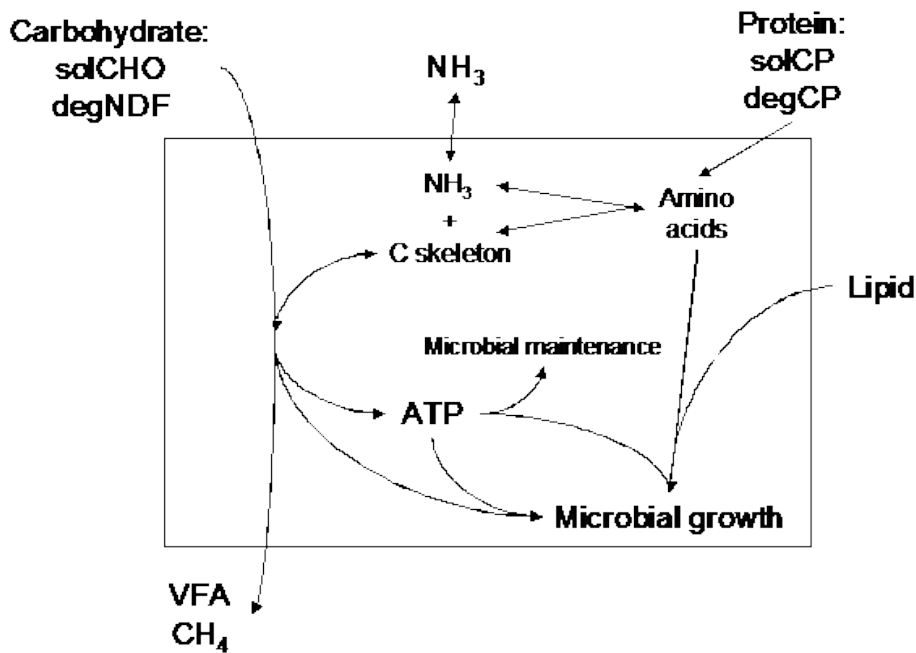

Figure S 69. Schematic representation of the nutrient supply, methane production and microbial growth section in the model.

The initial assumption was that supplied amino acids are used with a biological value (BV) of 0.64 for microbial growth. This determines the potential for microbial growth and the quantity of hexose required for direct incorporation into new microbial matter is calculated. The remaining hexose is available for fermentation to provide ATP and the yield of ATP is determined. This is compared with the ATP required for microbial maintenance and potential growth.

If ATP yield is limiting, then the biological value with which amino acids are used is reduced, iteratively, until either BV reaches zero or ATP yield matches ATP requirement. Reduction of BV results in (i) greater quantities of amino acids being fermented, increasing ATP yield, and (ii) a lower potential microbial growth, reducing ATP and hexose requirement for growth thus increasing the amount of hexose fermented.

If ATP yield is greater than ATP requirement, the available hexose supply is greater than that of amino acids. In such cases, the potential for microbial growth from ammonia is calculated. This is limited either by ammonia or hexose availability.

Finally, the quantities of individual VFAs and methane produced are calculated based on the quantities of different substrates fermented using the stoichiometries of (69). The quantity of ammonia used or produced is calculated and ammonia pools within the gut are updated.

Microbial growth is thus dependant on both fermentable nitrogen (either as protein or ammonia) and fermentable carbohydrate supply. There is no fixed upper limit to the quantity of microbial matter produced; the lower limit is zero growth. If fermentable nitrogen supply limits the amount of

fermentable carbohydrate that can be used, unfermented carbohydrate is returned to the appropriate rumen pool, thus reducing the effective rate of carbohydrate fermentation.

The effects of low pH caused by feeding grain supplements to ruminants consuming forage diets (e.g. (53)) was incorporated using the empirical relationship proposed by (58). According to these authors, the digestion rate of the cell wall fraction diminishes linearly below pH 6.2; and ceases at around pH 5.4. Similar relationships were reported by (42). Interaction between forages and high levels of grain supplements was obtained with this relationship.

The volatile fatty acids produced from fermentation in the rumen and large intestine, digested microbial true protein and protein, soluble sugars, starch and fat from feed ingredients that escaped ruminal fermentation were accumulated over each 24 h period. The quantities produced, multiplied by their energy content (70) were used to determine metabolisable energy and protein supply on a daily basis.

### c. Evaluation of the model

The intake section of the model was tested first using the datasets given in Table S 8.

Table S 8. General characteristics of the experimental datasets used for evaluating the performance of the model for predicting intake.

| Reference                                                               | Species           | BW (kg)    | Diets                                                                                                                                                                                           |
|-------------------------------------------------------------------------|-------------------|------------|-------------------------------------------------------------------------------------------------------------------------------------------------------------------------------------------------|
| Ref (71)                                                                | Sheep             | 20         | <i>Eragostis teff</i> supplemented with different levels of <i>Chamaecitissus palmensis</i> and/or supplemented with <i>Sesbania sesban</i>                                                     |
| ILRI data (unpublished)                                                 | Sheep             | 28         | Mixtures of veld hay, Napier hay and groundnut hay with or without urea at 1 or 2% of the diet                                                                                                  |
| Ref (72)                                                                | Steers<br>Heifers | 411<br>144 | Napier grass ( <i>Pennisetum purpureum</i> ) supplemented with graded levels of <i>Desmodium intortum</i> , lucerne ( <i>Medicago sativa</i> ) or sweet potato vines ( <i>Ipomoea batatas</i> ) |
| Ref (73)                                                                | Steers            | 144        | Diets consisting of Napier grass, groundnut hay, belabela bean straw, Guatemala grass                                                                                                           |
| Ref (74)                                                                | Sheep             | 18         | Maize stover supplemented with different levels of <i>Desmodium intortum</i>                                                                                                                    |
| Ref (75)                                                                | Steers            | 350        | Three varieties of <i>Panicum maximum</i> under grazing                                                                                                                                         |
| University of Edinburgh, Langhill experimental dairy farm (unpublished) | Dairy cows        | 540 to 680 | Total mixed rations consisting of first cut ryegrass silage (55%), whole crop wheat (15%) and commercial dairy concentrates (30%)                                                               |
| Ref (76)                                                                | Dual purpose cows | 450 to 503 | <i>Brachiaria mutica</i> or <i>Brachiaria decumbens</i> under grazing plus 3 kg commercial dairy concentrates                                                                                   |

|                            |            |     |                                                                                 |
|----------------------------|------------|-----|---------------------------------------------------------------------------------|
| ILRI data<br>(unpublished) | Sheep      | 20  | Millet stover ( <i>Pennisetum glaucum</i> ) plus high protein supplements       |
| ILRI data<br>(unpublished) | Sheep      | 20  | Millet stover ( <i>Pennisetum glaucum</i> ) plus different levels of cowpea hay |
| Ref (77)                   | Dairy cows | 500 | Kikuyu grass ( <i>Pennisetum clandestinum</i> ) under grazing                   |

Body weight ranged from 18 - 680 kg, while NDF varied from 446 - 881 g/kg DM, with potential diet digestibilities and cell wall rates of degradation of 0.4 - 0.78 and 0.016 - 0.01/h, respectively. Protein was non-limiting in all situations and therefore average parameters for grasses were used (see below). Since the model estimates the physically constrained intake of each animal on the particular diet, most data are from experiments in which the overall quality of the diet was low. The data are shown in Figure S 70 and it can be seen that there is good agreement between predicted and observed results.

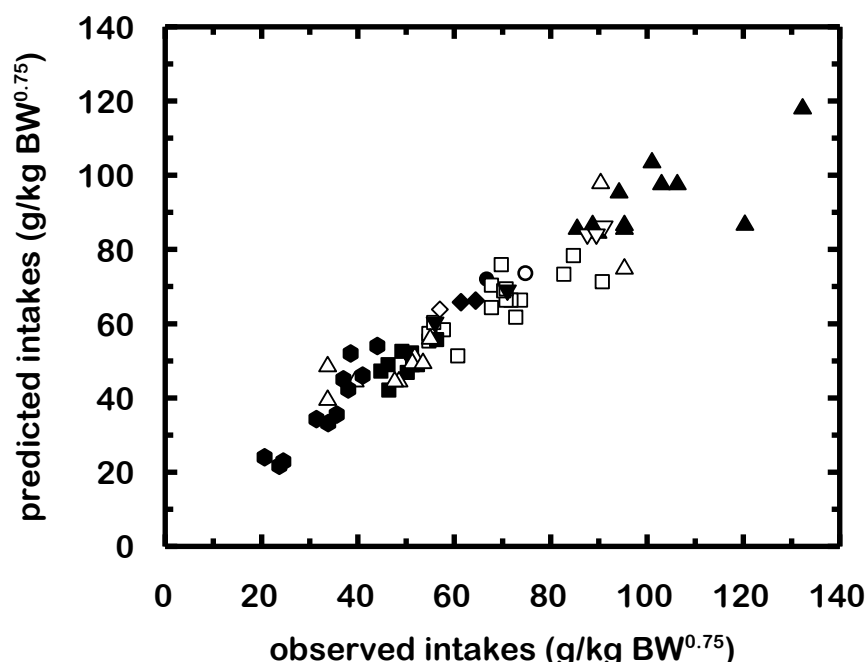

Figure S 70. Performance of the model for intake prediction of tropical forages

Experimental observations have also been included for a high quality diet, based on ryegrass silage. This was fed to high yielding dairy cows at around peak lactation when, again, it would be expected that physical constraints determined animal intake. The performance of the model in predicting the intake of the dairy cows is shown in Figure S 71. The differences between observed and predicted intakes are shown and average 0.5 kg/d on a total intake of approx. 20 kg/d. Use of the intake prediction equation of AFRC (43) for these animals gave predicted intakes that averaged 2 kg/d less than observed. The mean residual error of the whole dataset is +/- 5 g/kg BW<sup>0.75</sup> for an average intake of 82 g/kg BW<sup>0.75</sup>.

Since the primary intake sections of the model were directly derived from the previously validated model from (41), it was not surprising that model performance was relatively similar. The model explained 65% of the variation in observed intakes, with a mean prediction error of 7% ( $\pm 4.72$  g/kg

BW<sup>0.75</sup>). The model was slightly biased towards overestimating intake at high observed intakes, and this is probably due to the simplification of the model in the estimation of passage rates. In terms of sensitivity of the quality variables, the most sensitive variables were the cell wall concentration and its potential degradation, which is also in line with the observations in (41).

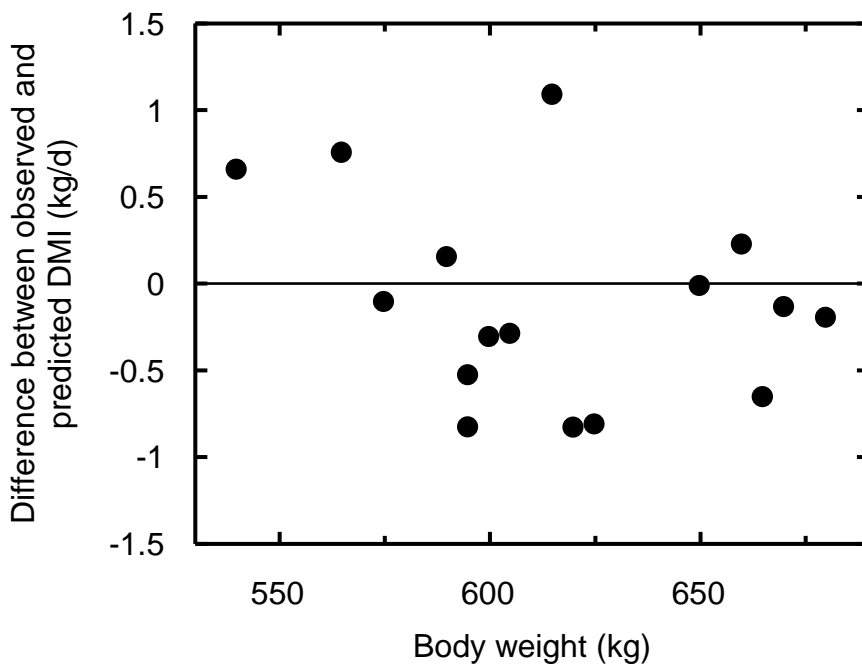

Figure S 71. Performance of the model on total mixed rations composed of first-cut ryegrass silage (55%), whole crop wheat (15%) and dairy concentrates (30%). For cows between 540-680 kg and intakes on average 19.9 kg (range 18.6 – 21.6 kg DM), milk yields 33.5 average (range 27.3 – 37.8 kg), animals were 3<sup>rd</sup> parity on a high forage system.

## 6. Diets for different livestock species

Estimation of the diets for different livestock species in different production systems and in different regions of the world was one of the essential steps for estimating biomass use, production, excretion. A similar methodology as that one employed for Africa in (78), and more recently by FAO for the dairy sector (79), and in (80) for studying mitigation options was implemented.

For each system and region we characterised typical diets for each animal species and feeding group using 4 types of main feeds. These were grazed grass, crop residues (stovers and straws), grains (grain-based supplements) and other feeds (cut and carry fodders, legumes, other planted forage).

### a. Key sources of information and parameters.

The percentage of inclusion of each of the four ingredients in the diet of different animal species was obtained from extensive literature reviews (81-118) while nutritional quality parameters for each feed ingredient were obtained from extensive databases of feed composition for ruminants (43, 119-122). These data are presented in Table S 10.

### b. Model results and GHG emissions

Productivity results and associated manure and N excretion and GHG emissions are presented in Table S 11. Results for animal productivity in this table are displayed in kg of product per tropical livestock unit. Conversion to protein, when used in this paper, is based on the average protein content of one kg of products at the world level, based on FAOSTAT as reported in Table S 9.

Table S 9. Conversion coefficient used for protein content of livestock products

| <b>Livestock product</b> | <b>Protein content (g/kg)</b> |
|--------------------------|-------------------------------|
| Bovine meat              | 138                           |
| Sheep and goat meat      | 137                           |
| Pig meat                 | 106                           |
| Poultry meat             | 127                           |
| Milk                     | 33                            |
| Eggs                     | 111                           |



Table S 10. The composition of the diet and parameters describing its nutritive value for different species, production systems and regions (BOVD = dairy cattle, BOVO = beef cattle and dairy followers, SGTD = small ruminants dairy, SGTO = small ruminants for meat). Variables description in Table S 7.

|             | solCHO | solCP | Ash | degNDF | degCP | CP  | Fat | ME  | NDF | k1    | k4    | k2    | k5    | Starch | Grass (%) | grain (%) | stover (%) | occasional (%) |  |
|-------------|--------|-------|-----|--------|-------|-----|-----|-----|-----|-------|-------|-------|-------|--------|-----------|-----------|------------|----------------|--|
| <b>BOVD</b> |        |       |     |        |       |     |     |     |     |       |       |       |       |        |           |           |            |                |  |
| <b>CIS</b>  |        |       |     |        |       |     |     |     |     |       |       |       |       |        |           |           |            |                |  |
| LGA         | 90     | 0.3   | 100 | 0.6    | 0.5   | 100 | 10  | 8.5 | 700 | 0.300 | 0.150 | 0.045 | 0.070 | 100    |           |           |            |                |  |
| LGT         | 120    | 0.3   | 100 | 0.6    | 0.5   | 120 | 10  | 9.3 | 650 | 0.300 | 0.150 | 0.044 | 0.070 | 100    |           |           |            |                |  |
| MRA         | 152    | 0.3   | 100 | 0.6    | 0.5   | 121 | 14  | 8.9 | 604 | 0.300 | 0.170 | 0.045 | 0.078 | 0.9    | 54        | 10        | 36         |                |  |
| MRH         | 157    | 0.3   | 100 | 0.6    | 0.5   | 127 | 15  | 9.1 | 591 | 0.300 | 0.170 | 0.046 | 0.080 | 0.9    | 57        | 12        | 31         |                |  |
| MRT         | 179    | 0.3   | 100 | 0.6    | 0.5   | 146 | 36  | 9.7 | 600 | 0.300 | 0.180 | 0.062 | 0.084 | 0.9    | 52        | 18        | 30         |                |  |
| Other       | 147    | 0.3   | 100 | 0.6    | 0.5   | 106 | 37  | 9.4 | 633 | 0.300 | 0.170 | 0.059 | 0.078 | 0.9    | 90        | 10        |            |                |  |
| URBAN       | 147    | 0.3   | 100 | 0.6    | 0.5   | 106 | 37  | 9.4 | 633 | 0.300 | 0.170 | 0.059 | 0.078 | 0.9    | 90        | 10        |            |                |  |
| <b>EAS</b>  |        |       |     |        |       |     |     |     |     |       |       |       |       |        |           |           |            |                |  |
| LGA         | 100    | 0.3   | 100 | 0.6    | 0.5   | 90  | 10  | 8.4 | 700 | 0.300 | 0.150 | 0.044 | 0.070 | 100    |           |           |            |                |  |
| LGH         | 83     | 0.3   | 100 | 0.8    | 0.5   | 121 | 10  | 8.8 | 686 | 0.300 | 0.150 | 0.042 | 0.070 | 100    |           |           |            |                |  |
| LGT         | 163    | 0.3   | 100 | 0.6    | 0.5   | 162 | 17  | 9.9 | 549 | 0.300 | 0.170 | 0.047 | 0.078 | 0.9    | 90        | 10        |            |                |  |
| MRA         | 77     | 0.3   | 100 | 0.5    | 0.5   | 173 | 10  | 8.6 | 777 | 0.300 | 0.160 | 0.031 | 0.068 | 0.9    | 1         | 0         | 87         | 12             |  |
| MRH         | 130    | 0.3   | 100 | 0.6    | 0.5   | 183 | 20  | 9.4 | 685 | 0.300 | 0.170 | 0.044 | 0.080 | 0.9    | 20        | 13        | 67         |                |  |
| MRT         | 227    | 0.3   | 100 | 0.6    | 0.5   | 179 | 30  | 11  | 510 | 0.300 | 0.200 | 0.063 | 0.093 | 0.9    | 42        | 28        | 30         |                |  |
| Other       | 195    | 0.4   | 100 | 0.7    | 0.4   | 141 | 27  | 10  | 537 | 0.300 | 0.180 | 0.072 | 0.082 | 0.9    | 86        | 14        |            |                |  |
| URBAN       | 212    | 0.4   | 100 | 0.7    | 0.4   | 152 | 25  | 11  | 506 | 0.300 | 0.190 | 0.078 | 0.084 | 0.9    | 83        | 17        |            |                |  |
| <b>EUR</b>  |        |       |     |        |       |     |     |     |     |       |       |       |       |        |           |           |            |                |  |
| LGA         | 133    | 0.3   | 99  | 0.6    | 0.5   | 116 | 33  | 9.3 | 634 | 0.300 | 0.160 | 0.065 | 0.071 | 0.7    | 97        | 3         |            |                |  |
| LGH         | 153    | 0.4   | 98  | 0.6    | 0.5   | 130 | 32  | 9.7 | 597 | 0.300 | 0.170 | 0.071 | 0.074 | 0.7    | 91        | 9         |            |                |  |
| LGT         | 225    | 0.6   | 93  | 0.8    | 0.3   | 189 | 26  | 11  | 454 | 0.300 | 0.220 | 0.096 | 0.084 | 0.7    | 73        | 27        |            |                |  |
| MRA         | 225    | 0.4   | 98  | 0.7    | 0.4   | 134 | 36  | 11  | 502 | 0.300 | 0.190 | 0.078 | 0.100 | 0.8    | 71        | 17        |            | 12             |  |
| MRH         | 204    | 0.5   | 92  | 0.7    | 0.3   | 178 | 33  | 12  | 458 | 0.300 | 0.210 | 0.089 | 0.095 | 0.8    | 71        | 27        |            | 3              |  |
| MRT         | 212    | 0.5   | 90  | 0.8    | 0.4   | 174 | 40  | 12  | 452 | 0.300 | 0.210 | 0.087 | 0.097 | 0.7    | 64        | 36        |            |                |  |
| Other       | 202    | 0.4   | 97  | 0.7    | 0.4   | 135 | 36  | 11  | 522 | 0.300 | 0.190 | 0.075 | 0.096 | 0.8    | 74        | 18        |            | 9              |  |
| URBAN       | 210    | 0.4   | 96  | 0.7    | 0.4   | 143 | 37  | 11  | 501 | 0.300 | 0.190 | 0.078 | 0.098 | 0.8    | 70        | 21        |            | 8              |  |
| <b>LAM</b>  |        |       |     |        |       |     |     |     |     |       |       |       |       |        |           |           |            |                |  |
| LGA         | 73     | 0.3   | 100 | 0.5    | 0.5   | 94  | 10  | 8.4 | 785 | 0.300 | 0.150 | 0.032 | 0.070 | 87     |           |           |            | 13             |  |
| LGH         | 121    | 0.3   | 100 | 0.6    | 0.5   | 102 | 12  | 8.8 | 668 | 0.300 | 0.160 | 0.046 | 0.073 | 0.9    | 87        | 3         |            | 10             |  |
| LGT         | 122    | 0.3   | 100 | 0.6    | 0.5   | 160 | 10  | 9.5 | 598 | 0.300 | 0.150 | 0.038 | 0.070 | 0.9    | 100       | 0         |            |                |  |
| MRA         | 159    | 0.4   | 97  | 0.6    | 0.4   | 132 | 17  | 9.7 | 623 | 0.300 | 0.190 | 0.060 | 0.077 | 0.7    | 49        | 13        | 21         | 17             |  |
| MRH         | 144    | 0.3   | 100 | 0.6    | 0.5   | 124 | 16  | 9.1 | 655 | 0.300 | 0.170 | 0.047 | 0.077 | 0.9    | 50        | 9         | 25         | 17             |  |
| MRT         | 237    | 0.3   | 95  | 0.6    | 0.5   | 183 | 31  | 11  | 475 | 0.300 | 0.210 | 0.063 | 0.090 | 0.9    | 31        | 33        | 12         | 24             |  |
| Other       | 120    | 0.3   | 99  | 0.6    | 0.5   | 112 | 14  | 9.2 | 705 | 0.300 | 0.170 | 0.041 | 0.075 | 0.8    | 76        | 6         |            | 18             |  |
| URBAN       | 118    | 0.3   | 99  | 0.6    | 0.5   | 110 | 14  | 9.2 | 711 | 0.300 | 0.170 | 0.040 | 0.074 | 0.8    | 76        | 5         |            | 19             |  |
| <b>MNA</b>  |        |       |     |        |       |     |     |     |     |       |       |       |       |        |           |           |            |                |  |
| LGA         | 84     | 0.3   | 100 | 0.8    | 0.5   | 118 | 10  | 8.8 | 687 | 0.300 | 0.150 | 0.042 | 0.070 | 100    |           |           |            |                |  |
| LGH         | 120    | 0.3   | 100 | 0.6    | 0.5   | 120 | 10  | 9.3 | 650 | 0.300 | 0.150 | 0.044 | 0.070 | 100    |           |           |            |                |  |
| LGT         | 120    | 0.3   | 100 | 0.6    | 0.5   | 160 | 10  | 9.5 | 600 | 0.300 | 0.150 | 0.038 | 0.070 | 100    |           |           |            |                |  |
| MRA         | 244    | 0.3   | 100 | 0.5    | 0.5   | 155 | 34  | 10  | 534 | 0.300 | 0.210 | 0.058 | 0.103 | 0.9    | 23        | 42        | 35         |                |  |
| MRH         | 291    | 0.3   | 100 | 0.6    | 0.6   | 154 | 39  | 11  | 457 | 0.300 | 0.220 | 0.066 | 0.110 | 0.9    | 31        | 50        | 19         |                |  |
| MRT         | 286    | 0.3   | 100 | 0.6    | 0.6   | 162 | 37  | 11  | 428 | 0.300 | 0.220 | 0.064 | 0.107 | 0.9    | 47        | 46        | 7          |                |  |
| Other       | 271    | 0.3   | 100 | 0.6    | 0.5   | 127 | 37  | 11  | 471 | 0.300 | 0.220 | 0.068 | 0.106 | 0.9    | 55        | 45        |            |                |  |
| URBAN       | 271    | 0.3   | 100 | 0.6    | 0.5   | 127 | 37  | 11  | 471 | 0.300 | 0.220 | 0.068 | 0.106 | 0.9    | 55        | 45        |            |                |  |

|            | solCHO | solCP | Ash | degNDF | degCP | CP  | Fat | ME  | NDF | k1    | k4    | k2    | k5    | Starch | Grass (%) | grain (%) | stover (%) | occasional (%) |    |
|------------|--------|-------|-----|--------|-------|-----|-----|-----|-----|-------|-------|-------|-------|--------|-----------|-----------|------------|----------------|----|
| <b>NAM</b> |        |       |     |        |       |     |     |     |     |       |       |       |       |        |           |           |            |                |    |
| MRA        | 236    | 0.6   | 92  | 0.8    | 0.3   | 198 | 25  | 12  | 434 | 0.300 | 0.230 | 0.100 | 0.085 | 0.7    | 70        | 30        |            |                |    |
| MRH        | 258    | 0.5   | 90  | 0.8    | 0.4   | 201 | 31  | 12  | 408 | 0.300 | 0.240 | 0.100 | 0.091 | 0.7    | 58        | 42        |            |                |    |
| MRT        | 247    | 0.5   | 87  | 0.8    | 0.4   | 192 | 42  | 12  | 397 | 0.300 | 0.240 | 0.096 | 0.102 | 0.7    | 50        | 50        |            |                |    |
| Other      | 205    | 0.6   | 92  | 0.8    | 0.3   | 185 | 33  | 12  | 442 | 0.300 | 0.220 | 0.093 | 0.094 | 0.7    | 70        | 30        |            |                |    |
| URBAN      | 203    | 0.6   | 92  | 0.8    | 0.3   | 185 | 33  | 12  | 444 | 0.300 | 0.220 | 0.093 | 0.094 | 0.7    | 70        | 30        |            |                |    |
| <b>OCE</b> |        |       |     |        |       |     |     |     |     |       |       |       |       |        |           |           |            |                |    |
| LGA        | 120    | 0.3   | 100 | 0.6    | 0.5   | 160 | 10  | 9.5 | 600 | 0.300 | 0.150 | 0.038 | 0.070 |        | 100       |           |            |                |    |
| LGH        | 187    | 0.3   | 100 | 0.7    | 0.5   | 180 | 22  | 10  | 469 | 0.300 | 0.180 | 0.061 | 0.084 | 0.9    | 82        | 18        |            |                |    |
| LGT        | 291    | 0.6   | 100 | 0.7    | 0.3   | 187 | 31  | 12  | 377 | 0.300 | 0.230 | 0.106 | 0.094 | 0.9    | 70        | 30        |            |                |    |
| MRA        | 120    | 0.3   | 100 | 0.6    | 0.5   | 147 | 16  | 9.4 | 614 | 0.300 | 0.150 | 0.043 | 0.070 |        | 100       |           |            |                |    |
| MRH        | 185    | 0.3   | 100 | 0.7    | 0.5   | 164 | 27  | 10  | 497 | 0.300 | 0.170 | 0.062 | 0.083 | 0.9    | 84        | 16        |            |                |    |
| MRT        | 284    | 0.5   | 100 | 0.7    | 0.4   | 166 | 38  | 11  | 407 | 0.300 | 0.220 | 0.097 | 0.096 | 0.9    | 68        | 32        |            |                |    |
| Other      | 149    | 0.3   | 100 | 0.6    | 0.5   | 155 | 14  | 9.8 | 576 | 0.300 | 0.170 | 0.039 | 0.079 | 0.9    | 89        | 11        |            |                |    |
| URBAN      | 218    | 0.3   | 100 | 0.6    | 0.5   | 138 | 14  | 11  | 568 | 0.300 | 0.210 | 0.041 | 0.078 | 0.9    | 0         | 10        |            |                | 90 |
| <b>SAS</b> |        |       |     |        |       |     |     |     |     |       |       |       |       |        |           |           |            |                |    |
| LGA        | 100    | 0.3   | 100 | 0.6    | 0.5   | 90  | 10  | 8.4 | 700 | 0.300 | 0.150 | 0.044 | 0.070 |        | 100       |           |            |                |    |
| LGH        | 120    | 0.3   | 100 | 0.6    | 0.5   | 120 | 10  | 9.3 | 650 | 0.300 | 0.150 | 0.044 | 0.070 |        | 100       |           |            |                |    |
| LGT        | 110    | 0.3   | 100 | 0.7    | 0.5   | 180 | 10  | 9.6 | 550 | 0.300 | 0.150 | 0.048 | 0.070 |        | 100       |           |            |                |    |
| MRA        | 244    | 0.3   | 100 | 0.6    | 0.5   | 101 | 35  | 9.3 | 521 | 0.300 | 0.200 | 0.066 | 0.098 | 0.9    | 30        | 35        | 35         |                |    |
| MRH        | 240    | 0.3   | 100 | 0.6    | 0.5   | 110 | 33  | 9.6 | 517 | 0.300 | 0.200 | 0.064 | 0.096 | 0.9    | 35        | 32        | 32         |                |    |
| MRT        | 283    | 0.3   | 100 | 0.7    | 0.5   | 138 | 40  | 10  | 425 | 0.300 | 0.210 | 0.073 | 0.104 | 0.9    | 29        | 42        | 28         |                |    |
| Other      | 247    | 0.3   | 100 | 0.6    | 0.5   | 92  | 36  | 9   | 525 | 0.300 | 0.210 | 0.065 | 0.100 | 0.9    | 7         | 37        | 56         |                |    |
| URBAN      | 247    | 0.3   | 100 | 0.6    | 0.5   | 92  | 36  | 9   | 525 | 0.300 | 0.210 | 0.065 | 0.100 | 0.9    | 7         | 37        | 56         |                |    |
| <b>SEA</b> |        |       |     |        |       |     |     |     |     |       |       |       |       |        |           |           |            |                |    |
| LGA        | 100    | 0.3   | 100 | 0.6    | 0.5   | 90  | 10  | 8.4 | 700 | 0.300 | 0.150 | 0.044 | 0.070 |        | 100       |           |            |                |    |
| LGH        | 120    | 0.3   | 100 | 0.6    | 0.5   | 120 | 10  | 9.3 | 650 | 0.300 | 0.150 | 0.044 | 0.070 |        | 100       |           |            |                |    |
| LGT        | 92     | 0.3   | 100 | 0.6    | 0.5   | 102 | 10  | 8.5 | 695 | 0.300 | 0.150 | 0.045 | 0.070 | 0.9    | 100       | 0         |            |                |    |
| MRA        | 130    | 0.3   | 100 | 0.6    | 0.5   | 145 | 17  | 9.1 | 678 | 0.300 | 0.170 | 0.046 | 0.078 | 0.9    | 48        | 10        | 41         |                |    |
| MRH        | 180    | 0.3   | 100 | 0.6    | 0.5   | 173 | 26  | 9.7 | 618 | 0.300 | 0.180 | 0.053 | 0.088 | 0.9    | 20        | 23        | 57         |                |    |
| MRT        | 130    | 0.3   | 100 | 0.6    | 0.5   | 178 | 19  | 9.3 | 687 | 0.300 | 0.170 | 0.045 | 0.080 | 0.9    | 20        | 13        | 67         |                |    |
| Other      | 120    | 0.3   | 100 | 0.6    | 0.5   | 100 | 10  | 8.8 | 677 | 0.300 | 0.160 | 0.043 | 0.070 |        | 80        |           |            |                | 20 |
| URBAN      | 120    | 0.3   | 100 | 0.6    | 0.5   | 100 | 10  | 8.8 | 677 | 0.300 | 0.160 | 0.043 | 0.070 |        | 80        |           |            |                | 20 |
| <b>SSA</b> |        |       |     |        |       |     |     |     |     |       |       |       |       |        |           |           |            |                |    |
| LGA        | 100    | 0.3   | 100 | 0.5    | 0.5   | 90  | 10  | 8.3 | 700 | 0.300 | 0.150 | 0.044 | 0.070 | 0.9    | 92        | 0         | 4          | 4              |    |
| LGH        | 99     | 0.3   | 100 | 0.6    | 0.5   | 104 | 11  | 8.7 | 687 | 0.300 | 0.150 | 0.045 | 0.071 | 0.9    | 99        | 1         |            |                |    |
| LGT        | 162    | 0.3   | 100 | 0.7    | 0.5   | 139 | 19  | 9.6 | 567 | 0.300 | 0.170 | 0.053 | 0.080 | 0.9    | 77        | 12        | 11         |                |    |
| MRA        | 104    | 0.3   | 100 | 0.5    | 0.5   | 92  | 14  | 8   | 713 | 0.300 | 0.160 | 0.040 | 0.073 | 0.9    | 53        | 4         | 33         | 10             |    |
| MRH        | 131    | 0.3   | 100 | 0.6    | 0.5   | 102 | 19  | 8.5 | 667 | 0.300 | 0.170 | 0.045 | 0.079 | 0.9    | 60        | 11        | 27         | 2              |    |
| MRT        | 177    | 0.3   | 100 | 0.6    | 0.5   | 105 | 24  | 8.9 | 609 | 0.300 | 0.180 | 0.051 | 0.086 | 0.9    | 51        | 17        | 29         | 2              |    |
| Other      | 117    | 0.3   | 100 | 0.6    | 0.5   | 113 | 10  | 9   | 663 | 0.300 | 0.150 | 0.043 | 0.071 | 0.9    | 91        | 1         | 6          | 2              |    |
| URBAN      | 133    | 0.3   | 100 | 0.6    | 0.5   | 120 | 12  | 9.2 | 630 | 0.300 | 0.160 | 0.047 | 0.076 | 0.9    | 88        | 3         | 5          | 4              |    |

|            | 90iCHO | 90iCP | Ash | degNDF | degCP | CP  | Fat | ME  | NDF | k1    | k4    | k2    | k5    | Starch | Grass (%) | grain (%) | stover (%) | occasional (%) |  |
|------------|--------|-------|-----|--------|-------|-----|-----|-----|-----|-------|-------|-------|-------|--------|-----------|-----------|------------|----------------|--|
| <b>WRD</b> |        |       |     |        |       |     |     |     |     |       |       |       |       |        |           |           |            |                |  |
| LGA        | 96     | 0.3   | 100 | 0.6    | 0.5   | 103 | 10  | 8.6 | 696 | 0.300 | 0.150 | 0.042 | 0.070 | 0.9    | 95        | 0         | 2          | 3              |  |
| LGH        | 129    | 0.3   | 100 | 0.6    | 0.5   | 114 | 14  | 9   | 641 | 0.300 | 0.160 | 0.049 | 0.074 | 0.9    | 88        | 5         |            | 7              |  |
| LGT        | 132    | 0.3   | 100 | 0.6    | 0.5   | 131 | 12  | 9.5 | 623 | 0.300 | 0.160 | 0.049 | 0.072 | 0.8    | 96        | 3         | 1          |                |  |
| MRA        | 218    | 0.3   | 99  | 0.6    | 0.5   | 113 | 30  | 9.4 | 549 | 0.300 | 0.200 | 0.063 | 0.093 | 0.9    | 38        | 29        | 31         | 2              |  |
| MRH        | 177    | 0.3   | 99  | 0.6    | 0.5   | 133 | 23  | 9.6 | 588 | 0.300 | 0.180 | 0.058 | 0.084 | 0.9    | 50        | 18        | 24         | 8              |  |
| MRT        | 209    | 0.4   | 94  | 0.7    | 0.5   | 164 | 37  | 11  | 499 | 0.300 | 0.200 | 0.076 | 0.093 | 0.8    | 55        | 31        | 13         | 1              |  |
| Other      | 181    | 0.4   | 98  | 0.6    | 0.5   | 124 | 30  | 9.9 | 573 | 0.300 | 0.180 | 0.064 | 0.087 | 0.8    | 67        | 18        | 9          | 6              |  |
| URBAN      | 210    | 0.4   | 98  | 0.6    | 0.5   | 128 | 32  | 10  | 533 | 0.300 | 0.200 | 0.068 | 0.093 | 0.8    | 52        | 24        | 13         | 12             |  |

|             | solCHO | solCP | Ash | degNDF | degCP | CP  | Fat | ME  | NDF | k1    | k4    | k2    | k5    | Starch | Grass (%) | grain (%) | stover (%) | occasional (%) |    |
|-------------|--------|-------|-----|--------|-------|-----|-----|-----|-----|-------|-------|-------|-------|--------|-----------|-----------|------------|----------------|----|
| <b>BOVO</b> |        |       |     |        |       |     |     |     |     |       |       |       |       |        |           |           |            |                |    |
| <b>CIS</b>  |        |       |     |        |       |     |     |     |     |       |       |       |       |        |           |           |            |                |    |
| LGA         | 120    | 0.3   | 100 | 0.6    | 0.5   | 104 | 35  | 9   | 661 | 0.300 | 0.150 | 0.060 | 0.070 | 100    |           |           |            |                |    |
| LGT         | 207    | 0.3   | 100 | 0.6    | 0.5   | 139 | 11  | 10  | 580 | 0.300 | 0.200 | 0.040 | 0.073 | 0.9    | 4         |           |            | 96             |    |
| MRA         | 85     | 0.5   | 98  | 0.6    | 0.4   | 146 | 27  | 10  | 635 | 0.300 | 0.150 | 0.064 | 0.086 |        | 65        |           |            | 35             |    |
| MRH         | 127    | 0.5   | 99  | 0.6    | 0.4   | 147 | 30  | 11  | 593 | 0.300 | 0.180 | 0.058 | 0.098 | 0.9    | 50        | 17        |            | 33             |    |
| MRT         | 145    | 0.5   | 99  | 0.6    | 0.4   | 145 | 32  | 11  | 571 | 0.300 | 0.180 | 0.059 | 0.102 | 0.9    | 50        | 21        |            | 29             |    |
| Other       | 120    | 0.3   | 100 | 0.6    | 0.5   | 104 | 35  | 9   | 661 | 0.300 | 0.150 | 0.060 | 0.070 | 100    |           |           |            |                |    |
| URBAN       | 120    | 0.3   | 100 | 0.6    | 0.5   | 104 | 35  | 9   | 661 | 0.300 | 0.150 | 0.060 | 0.070 | 100    |           |           |            |                |    |
| <b>EAS</b>  |        |       |     |        |       |     |     |     |     |       |       |       |       |        |           |           |            |                |    |
| LGA         | 100    | 0.3   | 100 | 0.6    | 0.5   | 90  | 10  | 8.4 | 700 | 0.300 | 0.150 | 0.044 | 0.070 | 100    |           |           |            |                |    |
| LGH         | 83     | 0.3   | 100 | 0.8    | 0.5   | 121 | 10  | 8.8 | 686 | 0.300 | 0.150 | 0.042 | 0.070 | 100    |           |           |            |                |    |
| LGT         | 161    | 0.3   | 100 | 0.6    | 0.5   | 162 | 17  | 9.9 | 551 | 0.300 | 0.160 | 0.046 | 0.078 | 0.9    | 91        | 9         |            |                |    |
| MRA         | 77     | 0.3   | 100 | 0.6    | 0.5   | 129 | 14  | 8.4 | 740 | 0.300 | 0.150 | 0.039 | 0.070 | 0.9    | 56        | 0         |            | 44             |    |
| MRH         | 124    | 0.3   | 100 | 0.6    | 0.5   | 123 | 16  | 8.7 | 687 | 0.300 | 0.160 | 0.044 | 0.076 | 0.9    | 44        | 8         |            | 47             |    |
| MRT         | 147    | 0.3   | 100 | 0.6    | 0.5   | 168 | 16  | 9.7 | 587 | 0.300 | 0.160 | 0.045 | 0.077 | 0.9    | 76        | 8         |            | 16             |    |
| Other       | 127    | 0.3   | 100 | 0.7    | 0.5   | 124 | 15  | 9.5 | 629 | 0.300 | 0.150 | 0.051 | 0.073 | 0.9    | 98        | 2         |            |                |    |
| URBAN       | 133    | 0.4   | 100 | 0.7    | 0.5   | 128 | 14  | 9.6 | 620 | 0.300 | 0.160 | 0.054 | 0.073 | 0.9    | 98        | 2         |            |                |    |
| <b>EUR</b>  |        |       |     |        |       |     |     |     |     |       |       |       |       |        |           |           |            |                |    |
| LGA         | 153    | 0.3   | 100 | 0.6    | 0.5   | 119 | 25  | 9.5 | 630 | 0.300 | 0.170 | 0.052 | 0.070 |        | 58        |           |            |                | 42 |
| LGH         | 130    | 0.4   | 100 | 0.6    | 0.5   | 118 | 31  | 9.3 | 634 | 0.300 | 0.160 | 0.066 | 0.070 |        | 99        |           |            |                | 1  |
| LGT         | 159    | 0.5   | 71  | 0.7    | 0.4   | 105 | 28  | 10  | 641 | 0.300 | 0.170 | 0.067 | 0.080 | 0.7    | 86        | 11        |            |                | 3  |
| MRA         | 255    | 0.4   | 99  | 0.6    | 0.4   | 131 | 22  | 11  | 493 | 0.300 | 0.190 | 0.062 | 0.112 | 0.9    | 26        | 8         |            |                | 66 |
| MRH         | 138    | 0.6   | 84  | 0.7    | 0.3   | 132 | 33  | 11  | 549 | 0.300 | 0.170 | 0.074 | 0.100 | 0.7    | 80        | 10        |            |                | 9  |
| MRT         | 151    | 0.6   | 83  | 0.8    | 0.3   | 142 | 37  | 12  | 523 | 0.300 | 0.180 | 0.077 | 0.099 | 0.7    | 77        | 19        |            |                | 4  |
| Other       | 176    | 0.3   | 98  | 0.6    | 0.5   | 119 | 30  | 9.8 | 591 | 0.300 | 0.170 | 0.061 | 0.085 | 0.7    | 68        | 6         |            |                | 26 |
| URBAN       | 186    | 0.3   | 98  | 0.6    | 0.5   | 120 | 35  | 9.9 | 576 | 0.300 | 0.180 | 0.065 | 0.085 | 0.8    | 72        | 13        |            |                | 16 |
| <b>LAM</b>  |        |       |     |        |       |     |     |     |     |       |       |       |       |        |           |           |            |                |    |
| LGA         | 91     | 0.3   | 100 | 0.5    | 0.5   | 104 | 10  | 8.4 | 697 | 0.300 | 0.150 | 0.045 | 0.070 |        | 80        |           |            |                | 20 |
| LGH         | 134    | 0.3   | 100 | 0.6    | 0.5   | 135 | 10  | 9.5 | 624 | 0.300 | 0.160 | 0.042 | 0.070 |        | 82        |           |            |                | 18 |
| LGT         | 120    | 0.3   | 100 | 0.6    | 0.5   | 126 | 10  | 9.3 | 642 | 0.300 | 0.150 | 0.043 | 0.070 |        | 100       |           |            |                |    |
| MRA         | 96     | 0.3   | 100 | 0.5    | 0.5   | 148 | 10  | 8.6 | 726 | 0.300 | 0.160 | 0.036 | 0.070 |        | 5         |           |            | 50             | 46 |
| MRH         | 202    | 0.3   | 100 | 0.6    | 0.5   | 113 | 10  | 9.3 | 583 | 0.300 | 0.180 | 0.053 | 0.080 | 0.7    | 70        | 0         |            |                | 29 |
| MRT         | 344    | 0.3   | 92  | 0.6    | 0.5   | 139 | 27  | 10  | 431 | 0.300 | 0.240 | 0.069 | 0.098 | 0.8    | 14        | 20        |            |                | 66 |
| Other       | 127    | 0.3   | 100 | 0.6    | 0.5   | 124 | 13  | 9.2 | 641 | 0.300 | 0.160 | 0.044 | 0.072 | 0.9    | 86        | 3         |            |                | 11 |
| URBAN       | 193    | 0.3   | 100 | 0.6    | 0.5   | 134 | 12  | 10  | 595 | 0.300 | 0.190 | 0.042 | 0.072 | 0.9    | 15        | 2         |            |                | 82 |
| <b>MNA</b>  |        |       |     |        |       |     |     |     |     |       |       |       |       |        |           |           |            |                |    |
| LGA         | 111    | 0.3   | 100 | 0.7    | 0.5   | 119 | 14  | 9.1 | 660 | 0.300 | 0.160 | 0.043 | 0.077 | 0.9    | 91        | 9         |            |                |    |
| LGH         | 143    | 0.3   | 100 | 0.6    | 0.5   | 120 | 13  | 9.6 | 627 | 0.300 | 0.160 | 0.045 | 0.077 | 0.9    | 91        | 9         |            |                |    |
| LGT         | 125    | 0.3   | 100 | 0.6    | 0.5   | 159 | 11  | 9.6 | 596 | 0.300 | 0.150 | 0.038 | 0.071 | 0.9    | 98        | 2         |            |                |    |
| MRA         | 221    | 0.3   | 100 | 0.6    | 0.5   | 124 | 29  | 10  | 533 | 0.300 | 0.200 | 0.057 | 0.099 | 0.9    | 64        | 36        |            |                |    |
| MRH         | 228    | 0.3   | 100 | 0.6    | 0.5   | 129 | 27  | 11  | 521 | 0.300 | 0.200 | 0.057 | 0.095 | 0.9    | 69        | 31        |            |                |    |
| MRT         | 228    | 0.3   | 100 | 0.6    | 0.5   | 158 | 27  | 11  | 484 | 0.300 | 0.200 | 0.054 | 0.094 | 0.9    | 70        | 30        |            |                |    |
| Other       | 184    | 0.3   | 100 | 0.6    | 0.5   | 113 | 24  | 9.6 | 584 | 0.300 | 0.190 | 0.055 | 0.090 | 0.9    | 75        | 25        |            |                |    |
| URBAN       | 234    | 0.3   | 100 | 0.6    | 0.5   | 118 | 31  | 10  | 527 | 0.300 | 0.210 | 0.058 | 0.102 | 0.9    | 60        | 40        |            |                |    |

|            | solCHO | solCP | Ash | degNDF | degCP | CP  | Fat | ME  | NDF | k1    | k4    | k2    | k5    | Starch | Grass (%) | grain (%) | stover (%) | occasional (%) |  |
|------------|--------|-------|-----|--------|-------|-----|-----|-----|-----|-------|-------|-------|-------|--------|-----------|-----------|------------|----------------|--|
| <b>NAM</b> |        |       |     |        |       |     |     |     |     |       |       |       |       |        |           |           |            |                |  |
| LGA        | 120    | 0.3   | 100 | 0.6    | 0.5   | 104 | 35  | 9   | 661 | 0.300 | 0.150 | 0.060 | 0.070 | 100    |           |           |            |                |  |
| LGH        | 131    | 0.4   | 100 | 0.6    | 0.5   | 119 | 31  | 9.3 | 633 | 0.300 | 0.160 | 0.067 | 0.070 | 100    |           |           |            |                |  |
| LGT        | 172    | 0.6   | 49  | 0.8    | 0.4   | 86  | 27  | 11  | 663 | 0.300 | 0.180 | 0.066 | 0.087 | 0.7    | 82        | 18        |            |                |  |
| MRA        | 95     | 0.5   | 96  | 0.6    | 0.4   | 169 | 30  | 11  | 592 | 0.300 | 0.160 | 0.070 | 0.092 | 0.7    | 62        | 8         | 31         |                |  |
| MRH        | 122    | 0.5   | 94  | 0.7    | 0.4   | 177 | 33  | 11  | 570 | 0.300 | 0.180 | 0.067 | 0.094 | 0.7    | 50        | 19        | 31         |                |  |
| MRT        | 163    | 0.5   | 88  | 0.7    | 0.4   | 173 | 37  | 12  | 521 | 0.300 | 0.190 | 0.074 | 0.099 | 0.7    | 50        | 30        | 20         |                |  |
| Other      | 140    | 0.3   | 98  | 0.6    | 0.5   | 113 | 37  | 9.4 | 629 | 0.300 | 0.160 | 0.063 | 0.074 | 0.7    | 92        | 8         |            |                |  |
| URBAN      | 140    | 0.3   | 98  | 0.6    | 0.5   | 113 | 37  | 9.4 | 629 | 0.300 | 0.160 | 0.063 | 0.074 | 0.7    | 92        | 8         |            |                |  |
| <b>OCE</b> |        |       |     |        |       |     |     |     |     |       |       |       |       |        |           |           |            |                |  |
| LGA        | 130    | 0.4   | 100 | 0.6    | 0.5   | 165 | 10  | 9.7 | 583 | 0.300 | 0.160 | 0.049 | 0.070 | 100    |           |           |            |                |  |
| LGH        | 132    | 0.4   | 100 | 0.7    | 0.4   | 134 | 10  | 9.6 | 621 | 0.300 | 0.160 | 0.055 | 0.070 | 100    |           |           | 0          |                |  |
| LGT        | 121    | 0.4   | 100 | 0.7    | 0.5   | 181 | 10  | 9.8 | 542 | 0.300 | 0.160 | 0.056 | 0.070 | 100    |           |           | 0          |                |  |
| MRA        | 136    | 0.4   | 100 | 0.6    | 0.4   | 168 | 10  | 9.9 | 573 | 0.300 | 0.160 | 0.055 | 0.070 | 100    |           |           |            |                |  |
| MRH        | 141    | 0.4   | 100 | 0.7    | 0.4   | 144 | 10  | 9.8 | 598 | 0.300 | 0.170 | 0.064 | 0.070 | 99     |           |           | 1          |                |  |
| MRT        | 133    | 0.4   | 100 | 0.7    | 0.4   | 181 | 10  | 10  | 538 | 0.300 | 0.170 | 0.065 | 0.070 | 99     |           |           | 1          |                |  |
| Other      | 120    | 0.3   | 100 | 0.6    | 0.5   | 120 | 10  | 9.3 | 651 | 0.300 | 0.150 | 0.044 | 0.070 | 100    |           |           | 0          |                |  |
| URBAN      | 120    | 0.3   | 100 | 0.6    | 0.5   | 120 | 10  | 9.3 | 650 | 0.300 | 0.150 | 0.044 | 0.070 | 100    |           |           | 0          |                |  |
| <b>SAS</b> |        |       |     |        |       |     |     |     |     |       |       |       |       |        |           |           |            |                |  |
| LGA        | 100    | 0.3   | 100 | 0.6    | 0.5   | 90  | 10  | 8.4 | 700 | 0.300 | 0.150 | 0.044 | 0.070 | 100    |           |           |            |                |  |
| LGH        | 103    | 0.3   | 100 | 0.6    | 0.5   | 94  | 10  | 8.5 | 693 | 0.300 | 0.150 | 0.044 | 0.070 | 100    |           |           |            |                |  |
| LGT        | 119    | 0.3   | 100 | 0.6    | 0.5   | 129 | 10  | 9.3 | 636 | 0.300 | 0.150 | 0.045 | 0.070 | 100    |           |           |            |                |  |
| MRA        | 102    | 0.3   | 100 | 0.5    | 0.5   | 117 | 10  | 8.5 | 725 | 0.300 | 0.160 | 0.038 | 0.070 | 42     |           | 39        | 19         |                |  |
| MRH        | 114    | 0.3   | 100 | 0.6    | 0.5   | 118 | 10  | 8.8 | 707 | 0.300 | 0.160 | 0.037 | 0.070 | 33     |           | 40        | 26         |                |  |
| MRT        | 119    | 0.3   | 100 | 0.6    | 0.5   | 135 | 10  | 9.1 | 666 | 0.300 | 0.160 | 0.040 | 0.070 | 46     |           | 29        | 25         |                |  |
| Other      | 105    | 0.3   | 100 | 0.6    | 0.5   | 105 | 10  | 8.8 | 691 | 0.300 | 0.150 | 0.041 | 0.070 | 79     |           | 21        |            |                |  |
| URBAN      | 105    | 0.3   | 100 | 0.6    | 0.5   | 105 | 10  | 8.8 | 691 | 0.300 | 0.150 | 0.041 | 0.070 | 79     |           | 21        |            |                |  |
| <b>SEA</b> |        |       |     |        |       |     |     |     |     |       |       |       |       |        |           |           |            |                |  |
| LGA        | 100    | 0.3   | 100 | 0.6    | 0.5   | 90  | 10  | 8.4 | 700 | 0.300 | 0.150 | 0.044 | 0.070 | 100    |           |           |            |                |  |
| LGH        | 120    | 0.3   | 100 | 0.6    | 0.5   | 120 | 10  | 9.3 | 650 | 0.300 | 0.150 | 0.044 | 0.070 | 100    |           |           |            |                |  |
| LGT        | 93     | 0.3   | 100 | 0.6    | 0.5   | 106 | 10  | 8.6 | 690 | 0.300 | 0.150 | 0.045 | 0.070 | 100    |           |           |            |                |  |
| MRA        | 91     | 0.3   | 100 | 0.5    | 0.5   | 149 | 10  | 8.8 | 722 | 0.300 | 0.160 | 0.044 | 0.070 | 56     |           | 44        |            |                |  |
| MRH        | 94     | 0.4   | 100 | 0.6    | 0.4   | 197 | 10  | 9.3 | 714 | 0.300 | 0.160 | 0.050 | 0.070 | 29     |           | 71        |            |                |  |
| MRT        | 86     | 0.4   | 100 | 0.6    | 0.4   | 190 | 10  | 9.1 | 732 | 0.300 | 0.160 | 0.045 | 0.070 | 28     |           | 72        |            |                |  |
| Other      | 120    | 0.3   | 100 | 0.6    | 0.5   | 100 | 10  | 8.8 | 677 | 0.300 | 0.160 | 0.043 | 0.070 | 80     |           |           | 20         |                |  |
| URBAN      | 120    | 0.3   | 100 | 0.6    | 0.5   | 100 | 10  | 8.8 | 677 | 0.300 | 0.160 | 0.043 | 0.070 | 80     |           |           | 20         |                |  |
| <b>SSA</b> |        |       |     |        |       |     |     |     |     |       |       |       |       |        |           |           |            |                |  |
| LGA        | 96     | 0.3   | 100 | 0.6    | 0.5   | 91  | 10  | 8.3 | 703 | 0.300 | 0.150 | 0.044 | 0.070 | 92     |           | 4         | 4          |                |  |
| LGH        | 95     | 0.3   | 100 | 0.6    | 0.5   | 107 | 10  | 8.7 | 688 | 0.300 | 0.150 | 0.044 | 0.070 | 100    |           |           |            |                |  |
| LGT        | 112    | 0.3   | 100 | 0.7    | 0.5   | 165 | 10  | 9.5 | 576 | 0.300 | 0.150 | 0.047 | 0.070 | 100    |           |           |            |                |  |
| MRA        | 85     | 0.3   | 100 | 0.5    | 0.5   | 110 | 11  | 8.1 | 732 | 0.300 | 0.150 | 0.038 | 0.070 | 52     |           | 35        | 12         |                |  |
| MRH        | 92     | 0.3   | 100 | 0.6    | 0.5   | 156 | 12  | 8.9 | 721 | 0.300 | 0.160 | 0.038 | 0.073 | 0.9    | 46        | 4         | 47         | 3              |  |
| MRT        | 137    | 0.3   | 100 | 0.6    | 0.5   | 160 | 10  | 9.6 | 650 | 0.300 | 0.170 | 0.040 | 0.070 | 0.9    | 30        | 1         | 29         | 41             |  |
| Other      | 119    | 0.3   | 100 | 0.6    | 0.5   | 113 | 10  | 9.1 | 657 | 0.300 | 0.150 | 0.045 | 0.073 | 0.9    | 97        | 1         |            | 2              |  |
| URBAN      | 134    | 0.3   | 100 | 0.6    | 0.5   | 134 | 10  | 9.4 | 605 | 0.300 | 0.150 | 0.047 | 0.079 | 0.9    | 91        | 1         |            | 8              |  |



|            | 90iCHO | 90iCP | Ash | degNDF | degCP | CP  | Fat | ME  | NDF | k1    | k4    | k2    | k5    | Starch | Grass (%) | grain (%) | stover (%) | occasional (%) |  |
|------------|--------|-------|-----|--------|-------|-----|-----|-----|-----|-------|-------|-------|-------|--------|-----------|-----------|------------|----------------|--|
| <b>WRD</b> |        |       |     |        |       |     |     |     |     |       |       |       |       |        |           |           |            |                |  |
| LGA        | 105    | 0.3   | 100 | 0.6    | 0.5   | 107 | 14  | 8.7 | 676 | 0.300 | 0.150 | 0.047 | 0.070 | 0.9    | 91        | 0         | 2          | 6              |  |
| LGH        | 129    | 0.3   | 100 | 0.6    | 0.5   | 130 | 13  | 9.4 | 633 | 0.300 | 0.160 | 0.046 | 0.070 | 0.9    | 88        | 0         | 0          | 12             |  |
| LGT        | 157    | 0.4   | 79  | 0.7    | 0.4   | 119 | 20  | 10  | 626 | 0.300 | 0.170 | 0.055 | 0.078 | 0.7    | 77        | 9         | 0          | 14             |  |
| MRA        | 104    | 0.3   | 100 | 0.5    | 0.5   | 120 | 12  | 8.6 | 711 | 0.300 | 0.160 | 0.040 | 0.072 | 0.9    | 45        | 2         | 36         | 17             |  |
| MRH        | 159    | 0.3   | 99  | 0.6    | 0.5   | 127 | 12  | 9.2 | 634 | 0.300 | 0.170 | 0.049 | 0.077 | 0.7    | 56        | 2         | 22         | 20             |  |
| MRT        | 158    | 0.4   | 94  | 0.7    | 0.4   | 160 | 25  | 11  | 564 | 0.300 | 0.180 | 0.058 | 0.088 | 0.8    | 58        | 16        | 17         | 9              |  |
| Other      | 129    | 0.3   | 100 | 0.6    | 0.5   | 116 | 18  | 9.2 | 645 | 0.300 | 0.160 | 0.049 | 0.073 | 0.8    | 87        | 3         | 3          | 7              |  |
| URBAN      | 148    | 0.3   | 99  | 0.6    | 0.5   | 118 | 20  | 9.5 | 628 | 0.300 | 0.170 | 0.051 | 0.075 | 0.8    | 72        | 5         | 6          | 17             |  |

|             | solCHO | solCP | Ash | degNDF | degCP | CP  | Fat | ME  | NDF | k1    | k4    | k2    | k5    | Starch | Grass (%) | grain (%) | lover (%) | occasional (%) |    |
|-------------|--------|-------|-----|--------|-------|-----|-----|-----|-----|-------|-------|-------|-------|--------|-----------|-----------|-----------|----------------|----|
| <b>SGTD</b> |        |       |     |        |       |     |     |     |     |       |       |       |       |        |           |           |           |                |    |
| <b>CIS</b>  |        |       |     |        |       |     |     |     |     |       |       |       |       |        |           |           |           |                |    |
| LGA         | 120    | 0.3   | 100 | 0.6    | 0.5   | 104 | 35  | 9   | 661 | 0.300 | 0.150 | 0.060 | 0.070 | 100    |           |           |           |                |    |
| LGT         | 120    | 0.3   | 100 | 0.6    | 0.5   | 104 | 35  | 9   | 661 | 0.300 | 0.150 | 0.060 | 0.070 | 100    |           |           |           |                |    |
| MRA         | 134    | 0.3   | 100 | 0.6    | 0.5   | 105 | 36  | 9.2 | 646 | 0.300 | 0.160 | 0.059 | 0.074 | 0.9    | 95        | 5         |           |                |    |
| MRH         | 134    | 0.3   | 100 | 0.6    | 0.5   | 105 | 36  | 9.2 | 646 | 0.300 | 0.160 | 0.059 | 0.074 | 0.9    | 95        | 5         |           |                |    |
| MRT         | 148    | 0.3   | 100 | 0.6    | 0.5   | 106 | 37  | 9.4 | 632 | 0.300 | 0.170 | 0.059 | 0.078 | 0.9    | 89        | 11        |           |                |    |
| Other       | 134    | 0.3   | 100 | 0.6    | 0.5   | 105 | 36  | 9.2 | 646 | 0.300 | 0.160 | 0.059 | 0.074 | 0.9    | 95        | 5         |           |                |    |
| URBAN       | 134    | 0.3   | 100 | 0.6    | 0.5   | 105 | 36  | 9.2 | 646 | 0.300 | 0.160 | 0.059 | 0.074 | 0.9    | 95        | 5         |           |                |    |
| <b>EAS</b>  |        |       |     |        |       |     |     |     |     |       |       |       |       |        |           |           |           |                |    |
| LGA         | 96     | 0.3   | 100 | 0.5    | 0.5   | 90  | 10  | 8.4 | 715 | 0.300 | 0.150 | 0.042 | 0.070 | 100    |           |           |           |                |    |
| LGH         | 96     | 0.3   | 100 | 0.5    | 0.5   | 90  | 10  | 8.4 | 715 | 0.300 | 0.150 | 0.042 | 0.070 | 100    |           |           |           |                |    |
| LGT         | 96     | 0.3   | 100 | 0.5    | 0.5   | 90  | 10  | 8.4 | 715 | 0.300 | 0.150 | 0.042 | 0.070 | 100    |           |           |           |                |    |
| MRA         | 100    | 0.3   | 100 | 0.6    | 0.5   | 90  | 10  | 8.4 | 700 | 0.300 | 0.150 | 0.044 | 0.070 | 100    |           |           |           |                |    |
| MRH         | 100    | 0.3   | 100 | 0.6    | 0.5   | 90  | 10  | 8.4 | 700 | 0.300 | 0.150 | 0.043 | 0.070 | 100    |           | 0         | 0         |                |    |
| MRT         | 100    | 0.3   | 100 | 0.6    | 0.5   | 90  | 11  | 8.4 | 700 | 0.300 | 0.150 | 0.043 | 0.070 | 100    |           |           |           |                | 0  |
| Other       | 100    | 0.3   | 100 | 0.6    | 0.5   | 90  | 10  | 8.4 | 700 | 0.300 | 0.150 | 0.044 | 0.070 | 100    |           |           |           |                | 0  |
| URBAN       | 100    | 0.3   | 100 | 0.6    | 0.5   | 90  | 11  | 8.4 | 700 | 0.300 | 0.150 | 0.043 | 0.070 | 100    |           |           |           |                | 0  |
| <b>EUR</b>  |        |       |     |        |       |     |     |     |     |       |       |       |       |        |           |           |           |                |    |
| LGA         | 106    | 0.3   | 100 | 0.6    | 0.5   | 95  | 11  | 8.5 | 688 | 0.300 | 0.150 | 0.046 | 0.070 | 0.7    | 99        | 1         |           |                |    |
| LGH         | 127    | 0.4   | 98  | 0.6    | 0.5   | 107 | 21  | 8.6 | 643 | 0.300 | 0.170 | 0.043 | 0.073 | 0.7    | 93        | 7         |           |                |    |
| LGT         | 190    | 0.3   | 97  | 0.6    | 0.5   | 140 | 19  | 10  | 568 | 0.300 | 0.200 | 0.054 | 0.077 | 0.7    | 42        | 14        |           |                | 44 |
| MRA         | 228    | 0.3   | 100 | 0.6    | 0.5   | 121 | 34  | 10  | 554 | 0.300 | 0.200 | 0.061 | 0.096 | 0.9    | 67        | 32        |           |                | 0  |
| MRH         | 190    | 0.4   | 98  | 0.7    | 0.5   | 123 | 34  | 9.8 | 540 | 0.300 | 0.190 | 0.059 | 0.090 | 0.8    | 77        | 23        |           |                | 0  |
| MRT         | 131    | 0.3   | 99  | 0.6    | 0.5   | 112 | 19  | 9.1 | 631 | 0.300 | 0.160 | 0.052 | 0.078 | 0.8    | 71        | 8         |           |                | 22 |
| Other       | 193    | 0.3   | 99  | 0.6    | 0.5   | 119 | 40  | 9.7 | 561 | 0.300 | 0.180 | 0.068 | 0.084 | 0.9    | 78        | 19        |           |                | 3  |
| URBAN       | 219    | 0.3   | 99  | 0.7    | 0.5   | 124 | 44  | 10  | 527 | 0.300 | 0.190 | 0.072 | 0.089 | 0.9    | 74        | 25        |           |                | 1  |
| <b>LAM</b>  |        |       |     |        |       |     |     |     |     |       |       |       |       |        |           |           |           |                |    |
| LGA         | 91     | 0.3   | 100 | 0.5    | 0.5   | 90  | 10  | 8.4 | 730 | 0.300 | 0.150 | 0.040 | 0.070 | 99     |           |           |           |                | 1  |
| LGH         | 102    | 0.3   | 100 | 0.6    | 0.5   | 90  | 10  | 8.4 | 700 | 0.300 | 0.150 | 0.044 | 0.071 | 99     |           |           |           |                | 1  |
| LGT         | 125    | 0.3   | 100 | 0.6    | 0.5   | 153 | 12  | 9.5 | 608 | 0.300 | 0.150 | 0.040 | 0.072 | 0.9    | 97        | 3         |           |                |    |
| MRA         | 96     | 0.3   | 100 | 0.5    | 0.5   | 121 | 10  | 8.7 | 726 | 0.300 | 0.160 | 0.038 | 0.070 | 65     |           | 22        | 13        |                |    |
| MRH         | 346    | 0.3   | 100 | 0.6    | 0.5   | 89  | 18  | 8.8 | 466 | 0.300 | 0.220 | 0.076 | 0.105 | 0.7    | 40        | 7         | 5         |                | 47 |
| MRT         | 436    | 0.3   | 88  | 0.6    | 0.5   | 135 | 42  | 10  | 338 | 0.300 | 0.270 | 0.085 | 0.115 | 0.8    | 18        | 29        | 0         |                | 53 |
| Other       | 142    | 0.3   | 100 | 0.6    | 0.5   | 114 | 15  | 9.1 | 631 | 0.300 | 0.160 | 0.048 | 0.075 | 0.9    | 85        | 7         |           |                | 8  |
| URBAN       | 166    | 0.3   | 100 | 0.6    | 0.5   | 128 | 18  | 9.5 | 589 | 0.300 | 0.170 | 0.050 | 0.079 | 0.9    | 80        | 11        |           |                | 9  |
| <b>MNA</b>  |        |       |     |        |       |     |     |     |     |       |       |       |       |        |           |           |           |                |    |
| LGA         | 100    | 0.3   | 100 | 0.6    | 0.5   | 90  | 10  | 8.4 | 700 | 0.300 | 0.150 | 0.044 | 0.070 | 100    |           |           |           |                |    |
| LGH         | 120    | 0.3   | 100 | 0.6    | 0.5   | 120 | 10  | 9.3 | 650 | 0.300 | 0.150 | 0.044 | 0.070 | 100    |           |           |           |                |    |
| LGT         | 120    | 0.3   | 100 | 0.6    | 0.5   | 160 | 10  | 9.5 | 600 | 0.300 | 0.150 | 0.038 | 0.070 | 100    |           |           |           |                |    |
| MRA         | 129    | 0.3   | 100 | 0.5    | 0.5   | 126 | 16  | 9.1 | 684 | 0.300 | 0.170 | 0.041 | 0.081 | 0.9    | 57        | 14        | 28        |                |    |
| MRH         | 195    | 0.3   | 100 | 0.5    | 0.5   | 137 | 17  | 10  | 600 | 0.300 | 0.180 | 0.045 | 0.101 | 0.9    | 44        | 19        | 25        |                | 12 |
| MRT         | 207    | 0.3   | 100 | 0.5    | 0.5   | 152 | 19  | 10  | 567 | 0.300 | 0.190 | 0.043 | 0.104 | 0.9    | 41        | 24        | 24        |                | 12 |
| Other       | 136    | 0.4   | 100 | 0.6    | 0.5   | 99  | 10  | 8.8 | 655 | 0.300 | 0.160 | 0.048 | 0.087 | 87     |           |           |           |                | 13 |
| URBAN       | 90     | 0.3   | 100 | 0.6    | 0.5   | 100 | 10  | 8.5 | 700 | 0.300 | 0.150 | 0.045 | 0.070 | 100    |           |           |           |                |    |

|            | solCHO | solCP | Ash | degNDF | degCP | CP  | Fat | ME  | NDF | k1    | k4    | k2    | k5    | Starch | Grass (%) | grain (%) | lover (%) | occasional (%) |    |
|------------|--------|-------|-----|--------|-------|-----|-----|-----|-----|-------|-------|-------|-------|--------|-----------|-----------|-----------|----------------|----|
| <b>SAS</b> |        |       |     |        |       |     |     |     |     |       |       |       |       |        |           |           |           |                |    |
| LGA        | 104    | 0.3   | 100 | 0.5    | 0.5   | 100 | 10  | 8.6 | 688 | 0.300 | 0.150 | 0.044 | 0.070 | 87     |           |           |           |                | 13 |
| LGH        | 109    | 0.3   | 100 | 0.5    | 0.5   | 119 | 10  | 8.8 | 666 | 0.300 | 0.150 | 0.044 | 0.070 | 56     |           |           |           |                | 44 |
| LGT        | 110    | 0.3   | 100 | 0.7    | 0.5   | 180 | 10  | 9.6 | 550 | 0.300 | 0.150 | 0.048 | 0.070 | 100    |           |           |           |                |    |
| MRA        | 139    | 0.3   | 100 | 0.4    | 0.5   | 121 | 17  | 8.7 | 632 | 0.300 | 0.160 | 0.052 | 0.078 | 0.9    | 10        | 10        |           |                | 80 |
| MRH        | 150    | 0.3   | 100 | 0.6    | 0.5   | 123 | 13  | 9.5 | 622 | 0.300 | 0.170 | 0.045 | 0.073 | 0.9    | 72        | 4         | 4         |                | 21 |
| MRT        | 194    | 0.3   | 100 | 0.6    | 0.5   | 146 | 25  | 9.6 | 506 | 0.300 | 0.180 | 0.060 | 0.087 | 0.9    | 56        | 22        | 22        |                |    |
| Other      | 115    | 0.3   | 100 | 0.6    | 0.5   | 112 | 12  | 9   | 660 | 0.300 | 0.150 | 0.041 | 0.070 | 100    |           |           |           |                |    |
| URBAN      | 115    | 0.3   | 100 | 0.6    | 0.5   | 111 | 13  | 8.9 | 661 | 0.300 | 0.150 | 0.040 | 0.070 | 100    |           |           |           |                |    |
| <b>SEA</b> |        |       |     |        |       |     |     |     |     |       |       |       |       |        |           |           |           |                |    |
| LGA        | 100    | 0.3   | 100 | 0.6    | 0.5   | 90  | 10  | 8.4 | 700 | 0.300 | 0.150 | 0.044 | 0.070 | 100    |           |           |           |                |    |
| LGH        | 100    | 0.3   | 100 | 0.6    | 0.5   | 90  | 10  | 8.4 | 700 | 0.300 | 0.150 | 0.044 | 0.070 | 100    |           |           |           |                |    |
| LGT        | 120    | 0.3   | 100 | 0.6    | 0.5   | 160 | 10  | 9.5 | 600 | 0.300 | 0.150 | 0.038 | 0.070 | 100    |           |           |           |                |    |
| MRA        | 101    | 0.3   | 100 | 0.6    | 0.5   | 91  | 12  | 8.4 | 697 | 0.300 | 0.150 | 0.045 | 0.070 | 100    |           |           |           |                |    |
| MRH        | 101    | 0.3   | 100 | 0.6    | 0.5   | 91  | 12  | 8.4 | 697 | 0.300 | 0.150 | 0.045 | 0.070 | 100    |           |           |           |                |    |
| MRT        | 138    | 0.3   | 100 | 0.6    | 0.5   | 148 | 16  | 9.3 | 576 | 0.300 | 0.160 | 0.048 | 0.076 | 0.9    | 79        | 7         | 14        |                |    |
| Other      | 102    | 0.3   | 100 | 0.6    | 0.5   | 92  | 12  | 8.5 | 695 | 0.300 | 0.150 | 0.045 | 0.070 | 100    |           |           |           |                |    |
| URBAN      | 102    | 0.3   | 100 | 0.6    | 0.5   | 91  | 12  | 8.4 | 697 | 0.300 | 0.150 | 0.045 | 0.070 | 100    |           |           |           |                |    |
| <b>SSA</b> |        |       |     |        |       |     |     |     |     |       |       |       |       |        |           |           |           |                |    |
| LGA        | 90     | 0.3   | 100 | 0.6    | 0.5   | 104 | 11  | 8.6 | 696 | 0.300 | 0.150 | 0.045 | 0.070 | 100    |           |           |           |                |    |
| LGH        | 117    | 0.3   | 100 | 0.6    | 0.5   | 116 | 10  | 9.2 | 657 | 0.300 | 0.150 | 0.044 | 0.070 | 0.9    | 100       | 0         |           |                |    |
| LGT        | 110    | 0.3   | 100 | 0.7    | 0.5   | 179 | 10  | 9.6 | 551 | 0.300 | 0.150 | 0.048 | 0.070 | 100    |           |           |           |                |    |
| MRA        | 118    | 0.3   | 100 | 0.6    | 0.5   | 90  | 10  | 8.3 | 689 | 0.300 | 0.150 | 0.044 | 0.081 | 73     |           | 19        | 9         |                |    |
| MRH        | 174    | 0.3   | 100 | 0.6    | 0.5   | 118 | 12  | 9.6 | 608 | 0.300 | 0.170 | 0.048 | 0.087 | 0.9    | 65        | 0         | 2         | 33             |    |
| MRT        | 203    | 0.4   | 100 | 0.6    | 0.4   | 145 | 13  | 10  | 528 | 0.300 | 0.170 | 0.052 | 0.098 | 57     |           |           |           |                | 43 |
| Other      | 154    | 0.3   | 100 | 0.6    | 0.5   | 126 | 10  | 9.5 | 611 | 0.300 | 0.160 | 0.045 | 0.082 | 76     |           |           |           |                | 24 |
| URBAN      | 170    | 0.4   | 100 | 0.6    | 0.5   | 120 | 10  | 9.6 | 603 | 0.300 | 0.160 | 0.047 | 0.088 | 74     |           |           |           |                | 26 |
| <b>WRD</b> |        |       |     |        |       |     |     |     |     |       |       |       |       |        |           |           |           |                |    |
| LGA        | 96     | 0.3   | 100 | 0.6    | 0.5   | 97  | 11  | 8.5 | 698 | 0.300 | 0.150 | 0.045 | 0.070 | 0.7    | 99        | 0         |           |                | 1  |
| LGH        | 118    | 0.3   | 99  | 0.6    | 0.5   | 109 | 14  | 8.9 | 660 | 0.300 | 0.150 | 0.044 | 0.071 | 0.7    | 98        | 2         |           |                | 0  |
| LGT        | 112    | 0.3   | 100 | 0.6    | 0.5   | 117 | 13  | 8.9 | 662 | 0.300 | 0.150 | 0.044 | 0.071 | 0.7    | 96        | 1         |           |                | 3  |
| MRA        | 136    | 0.3   | 100 | 0.5    | 0.5   | 113 | 16  | 8.8 | 661 | 0.300 | 0.170 | 0.047 | 0.081 | 0.9    | 50        | 10        | 15        |                | 25 |
| MRH        | 162    | 0.3   | 100 | 0.6    | 0.5   | 114 | 15  | 9.3 | 615 | 0.300 | 0.170 | 0.049 | 0.077 | 0.8    | 75        | 5         | 3         |                | 17 |
| MRT        | 137    | 0.3   | 100 | 0.6    | 0.5   | 109 | 16  | 9   | 642 | 0.300 | 0.160 | 0.048 | 0.079 | 0.9    | 81        | 6         | 3         |                | 9  |
| Other      | 151    | 0.3   | 100 | 0.6    | 0.5   | 112 | 23  | 9.2 | 620 | 0.300 | 0.160 | 0.054 | 0.079 | 0.9    | 87        | 8         |           |                | 5  |
| URBAN      | 142    | 0.3   | 100 | 0.6    | 0.5   | 109 | 22  | 9.1 | 632 | 0.300 | 0.160 | 0.053 | 0.077 | 0.9    | 91        | 8         |           |                | 1  |

|             | solCHO | solCP | Ash | degNDF | degCP | CP  | Fat | ME  | NDF | k1    | k4    | k2    | k5    | Starch | Grass (%) | grain (%) | sover (%) | occasional (%) |  |
|-------------|--------|-------|-----|--------|-------|-----|-----|-----|-----|-------|-------|-------|-------|--------|-----------|-----------|-----------|----------------|--|
| <b>SGTO</b> |        |       |     |        |       |     |     |     |     |       |       |       |       |        |           |           |           |                |  |
| <b>CIS</b>  |        |       |     |        |       |     |     |     |     |       |       |       |       |        |           |           |           |                |  |
| LGA         | 164    | 0.3   | 100 | 0.6    | 0.5   | 112 | 40  | 9.5 | 602 | 0.300 | 0.170 | 0.066 | 0.078 | 0.9    | 90        | 10        |           |                |  |
| LGT         | 241    | 0.3   | 100 | 0.6    | 0.5   | 145 | 18  | 11  | 528 | 0.300 | 0.210 | 0.049 | 0.079 | 0.9    |           | 12        |           | 88             |  |
| MRA         | 150    | 0.4   | 99  | 0.6    | 0.4   | 125 | 40  | 10  | 565 | 0.300 | 0.160 | 0.074 | 0.087 | 0.9    | 90        | 10        |           |                |  |
| MRH         | 158    | 0.4   | 99  | 0.7    | 0.4   | 167 | 28  | 11  | 488 | 0.300 | 0.170 | 0.065 | 0.092 | 0.9    | 84        | 16        |           |                |  |
| MRT         | 202    | 0.4   | 99  | 0.7    | 0.4   | 146 | 30  | 11  | 501 | 0.300 | 0.200 | 0.063 | 0.094 | 0.9    | 37        | 16        |           | 47             |  |
| Other       | 163    | 0.3   | 100 | 0.6    | 0.5   | 112 | 40  | 9.5 | 604 | 0.300 | 0.170 | 0.066 | 0.078 | 0.9    | 90        | 10        |           |                |  |
| URBAN       | 163    | 0.3   | 100 | 0.6    | 0.5   | 112 | 40  | 9.5 | 604 | 0.300 | 0.170 | 0.066 | 0.078 | 0.9    | 90        | 10        |           |                |  |
| <b>EAS</b>  |        |       |     |        |       |     |     |     |     |       |       |       |       |        |           |           |           |                |  |
| LGA         | 241    | 0.3   | 100 | 0.6    | 0.5   | 145 | 18  | 11  | 528 | 0.300 | 0.210 | 0.049 | 0.079 | 0.9    |           | 12        |           | 88             |  |
| LGH         | 241    | 0.3   | 100 | 0.6    | 0.5   | 145 | 18  | 11  | 528 | 0.300 | 0.210 | 0.049 | 0.079 | 0.9    |           | 12        |           | 88             |  |
| LGT         | 259    | 0.3   | 100 | 0.6    | 0.5   | 147 | 22  | 11  | 504 | 0.300 | 0.220 | 0.053 | 0.083 | 0.9    |           | 17        |           | 83             |  |
| MRA         | 214    | 0.3   | 100 | 0.6    | 0.5   | 128 | 21  | 10  | 568 | 0.300 | 0.200 | 0.051 | 0.079 | 0.9    | 12        | 12        | 12        | 65             |  |
| MRH         | 236    | 0.3   | 100 | 0.6    | 0.5   | 128 | 22  | 10  | 545 | 0.300 | 0.210 | 0.052 | 0.084 | 0.9    | 0         | 18        | 18        | 64             |  |
| MRT         | 259    | 0.3   | 100 | 0.6    | 0.5   | 147 | 22  | 11  | 503 | 0.300 | 0.220 | 0.053 | 0.083 | 0.9    | 0         | 17        |           | 83             |  |
| Other       | 236    | 0.3   | 100 | 0.6    | 0.5   | 143 | 20  | 11  | 532 | 0.300 | 0.210 | 0.051 | 0.080 | 0.9    | 6         | 12        |           | 82             |  |
| URBAN       | 237    | 0.3   | 100 | 0.6    | 0.5   | 143 | 20  | 11  | 533 | 0.300 | 0.210 | 0.051 | 0.079 | 0.9    | 6         | 12        |           | 82             |  |
| <b>EUR</b>  |        |       |     |        |       |     |     |     |     |       |       |       |       |        |           |           |           |                |  |
| LGA         | 233    | 0.3   | 100 | 0.6    | 0.5   | 141 | 21  | 11  | 536 | 0.300 | 0.210 | 0.051 | 0.079 | 0.9    | 10        | 12        |           | 78             |  |
| LGH         | 179    | 0.3   | 100 | 0.6    | 0.5   | 124 | 34  | 9.8 | 578 | 0.300 | 0.180 | 0.067 | 0.078 | 0.9    | 78        | 10        |           | 11             |  |
| LGT         | 217    | 0.5   | 59  | 0.8    | 0.4   | 102 | 32  | 11  | 589 | 0.300 | 0.190 | 0.073 | 0.093 | 0.8    | 71        | 25        |           | 4              |  |
| MRA         | 296    | 0.4   | 100 | 0.6    | 0.4   | 136 | 22  | 11  | 465 | 0.300 | 0.210 | 0.060 | 0.109 | 0.9    | 6         | 16        |           | 78             |  |
| MRH         | 239    | 0.4   | 89  | 0.7    | 0.4   | 136 | 30  | 11  | 487 | 0.300 | 0.200 | 0.069 | 0.105 | 0.9    | 43        | 20        |           | 36             |  |
| MRT         | 202    | 0.5   | 79  | 0.8    | 0.4   | 138 | 39  | 12  | 501 | 0.300 | 0.200 | 0.078 | 0.101 | 0.8    | 65        | 28        |           | 7              |  |
| Other       | 229    | 0.3   | 99  | 0.6    | 0.5   | 128 | 29  | 10  | 531 | 0.300 | 0.190 | 0.063 | 0.093 | 0.9    | 45        | 13        |           | 42             |  |
| URBAN       | 247    | 0.3   | 99  | 0.6    | 0.5   | 129 | 36  | 10  | 505 | 0.300 | 0.200 | 0.069 | 0.096 | 0.9    | 49        | 21        |           | 30             |  |
| <b>LAM</b>  |        |       |     |        |       |     |     |     |     |       |       |       |       |        |           |           |           |                |  |
| LGA         | 144    | 0.3   | 100 | 0.6    | 0.5   | 111 | 18  | 9   | 628 | 0.300 | 0.170 | 0.054 | 0.079 | 0.9    | 77        | 12        |           | 12             |  |
| LGH         | 187    | 0.3   | 100 | 0.6    | 0.5   | 158 | 18  | 10  | 537 | 0.300 | 0.180 | 0.048 | 0.079 | 0.9    | 68        | 12        |           | 20             |  |
| LGT         | 170    | 0.3   | 100 | 0.7    | 0.5   | 129 | 18  | 9.8 | 583 | 0.300 | 0.170 | 0.053 | 0.079 | 0.9    | 88        | 12        |           | 0              |  |
| MRA         | 146    | 0.3   | 100 | 0.5    | 0.5   | 145 | 19  | 9.2 | 634 | 0.300 | 0.170 | 0.050 | 0.080 | 0.9    | 40        | 13        | 25        | 22             |  |
| MRH         | 196    | 0.3   | 100 | 0.6    | 0.5   | 155 | 19  | 10  | 578 | 0.300 | 0.190 | 0.049 | 0.080 | 0.9    | 27        | 13        | 20        | 41             |  |
| MRT         | 244    | 0.2   | 94  | 0.6    | 0.5   | 170 | 27  | 11  | 489 | 0.300 | 0.220 | 0.054 | 0.083 | 0.9    | 15        | 26        |           | 59             |  |
| Other       | 233    | 0.3   | 100 | 0.6    | 0.5   | 138 | 20  | 10  | 535 | 0.300 | 0.210 | 0.052 | 0.081 | 0.9    | 17        | 14        |           | 69             |  |
| URBAN       | 230    | 0.3   | 100 | 0.6    | 0.5   | 134 | 22  | 10  | 537 | 0.300 | 0.200 | 0.054 | 0.082 | 0.9    | 24        | 15        |           | 60             |  |
| <b>MNA</b>  |        |       |     |        |       |     |     |     |     |       |       |       |       |        |           |           |           |                |  |
| LGA         | 139    | 0.3   | 100 | 0.8    | 0.5   | 128 | 18  | 9.4 | 615 | 0.300 | 0.170 | 0.051 | 0.079 | 0.9    | 86        | 11        |           | 2              |  |
| LGH         | 170    | 0.3   | 100 | 0.7    | 0.5   | 127 | 18  | 9.8 | 585 | 0.300 | 0.170 | 0.053 | 0.079 | 0.9    | 88        | 12        |           |                |  |
| LGT         | 210    | 0.3   | 100 | 0.6    | 0.5   | 152 | 18  | 10  | 533 | 0.300 | 0.190 | 0.049 | 0.079 | 0.9    | 39        | 12        |           | 50             |  |
| MRA         | 235    | 0.3   | 100 | 0.6    | 0.5   | 157 | 31  | 11  | 533 | 0.300 | 0.210 | 0.056 | 0.099 | 0.9    | 25        | 36        | 27        | 12             |  |
| MRH         | 240    | 0.3   | 100 | 0.6    | 0.5   | 158 | 30  | 11  | 528 | 0.300 | 0.210 | 0.057 | 0.096 | 0.9    | 25        | 33        | 27        | 15             |  |
| MRT         | 256    | 0.3   | 100 | 0.6    | 0.5   | 161 | 29  | 11  | 499 | 0.300 | 0.210 | 0.057 | 0.094 | 0.9    | 16        | 31        | 17        | 36             |  |
| Other       | 231    | 0.3   | 100 | 0.6    | 0.5   | 127 | 27  | 10  | 526 | 0.300 | 0.200 | 0.059 | 0.092 | 0.9    | 49        | 28        |           | 23             |  |
| URBAN       | 225    | 0.3   | 100 | 0.6    | 0.5   | 122 | 29  | 10  | 531 | 0.300 | 0.200 | 0.061 | 0.095 | 0.9    | 62        | 31        |           | 7              |  |

|            | solCHO | solCP | Ash | degNDF | degCP | CP  | Fat | ME  | NDF | k1    | k4    | k2    | k5    | Starch | Grass (%) | grain (%) | lover (%) | occasional (%) |  |
|------------|--------|-------|-----|--------|-------|-----|-----|-----|-----|-------|-------|-------|-------|--------|-----------|-----------|-----------|----------------|--|
| <b>NAM</b> |        |       |     |        |       |     |     |     |     |       |       |       |       |        |           |           |           |                |  |
| LGA        | 164    | 0.3   | 100 | 0.6    | 0.5   | 112 | 40  | 9.5 | 602 | 0.300 | 0.170 | 0.066 | 0.078 | 0.9    | 90        | 10        |           |                |  |
| LGH        | 170    | 0.3   | 100 | 0.6    | 0.5   | 121 | 37  | 9.6 | 586 | 0.300 | 0.170 | 0.070 | 0.078 | 0.9    | 90        | 10        |           |                |  |
| LGT        | 216    | 0.5   | 55  | 0.8    | 0.4   | 94  | 33  | 11  | 600 | 0.300 | 0.190 | 0.072 | 0.095 | 0.8    | 73        | 27        |           |                |  |
| MRA        | 157    | 0.4   | 98  | 0.7    | 0.4   | 134 | 41  | 11  | 536 | 0.300 | 0.170 | 0.078 | 0.092 | 0.8    | 86        | 14        |           |                |  |
| MRH        | 173    | 0.6   | 75  | 0.7    | 0.3   | 125 | 38  | 11  | 540 | 0.300 | 0.180 | 0.078 | 0.100 | 0.8    | 79        | 21        |           |                |  |
| MRT        | 195    | 0.5   | 76  | 0.8    | 0.4   | 135 | 40  | 12  | 508 | 0.300 | 0.190 | 0.080 | 0.102 | 0.8    | 71        | 29        |           |                |  |
| Other      | 175    | 0.3   | 99  | 0.6    | 0.5   | 117 | 41  | 9.7 | 585 | 0.300 | 0.170 | 0.068 | 0.080 | 0.8    | 85        | 15        |           |                |  |
| URBAN      | 175    | 0.3   | 99  | 0.6    | 0.5   | 117 | 41  | 9.7 | 585 | 0.300 | 0.170 | 0.068 | 0.080 | 0.8    | 85        | 15        |           |                |  |
| <b>OCE</b> |        |       |     |        |       |     |     |     |     |       |       |       |       |        |           |           |           |                |  |
| LGA        | 177    | 0.4   | 100 | 0.6    | 0.5   | 166 | 18  | 10  | 529 | 0.300 | 0.170 | 0.055 | 0.079 | 0.9    | 88        | 12        |           |                |  |
| LGH        | 176    | 0.4   | 100 | 0.7    | 0.5   | 135 | 18  | 10  | 568 | 0.300 | 0.170 | 0.059 | 0.079 | 0.9    | 88        | 11        |           | 0              |  |
| LGT        | 162    | 0.3   | 100 | 0.7    | 0.5   | 181 | 17  | 10  | 498 | 0.300 | 0.170 | 0.061 | 0.078 | 0.9    | 90        | 10        |           |                |  |
| MRA        | 182    | 0.4   | 100 | 0.6    | 0.5   | 168 | 18  | 10  | 522 | 0.300 | 0.180 | 0.059 | 0.079 | 0.9    | 88        | 12        |           |                |  |
| MRH        | 183    | 0.4   | 100 | 0.7    | 0.4   | 143 | 18  | 10  | 551 | 0.300 | 0.180 | 0.066 | 0.079 | 0.9    | 88        | 11        |           | 0              |  |
| MRT        | 172    | 0.4   | 100 | 0.7    | 0.5   | 182 | 18  | 10  | 490 | 0.300 | 0.180 | 0.067 | 0.079 | 0.9    | 89        | 11        |           | 0              |  |
| Other      | 170    | 0.3   | 100 | 0.7    | 0.5   | 127 | 18  | 9.8 | 585 | 0.300 | 0.170 | 0.053 | 0.079 | 0.9    | 88        | 12        |           | 0              |  |
| URBAN      | 170    | 0.3   | 100 | 0.7    | 0.5   | 127 | 18  | 9.8 | 585 | 0.300 | 0.170 | 0.053 | 0.079 | 0.9    | 88        | 12        |           | 0              |  |
| <b>SAS</b> |        |       |     |        |       |     |     |     |     |       |       |       |       |        |           |           |           |                |  |
| LGA        | 157    | 0.3   | 100 | 0.6    | 0.5   | 101 | 19  | 9   | 623 | 0.300 | 0.170 | 0.054 | 0.080 | 0.9    | 87        | 13        |           |                |  |
| LGH        | 170    | 0.3   | 100 | 0.7    | 0.5   | 127 | 18  | 9.8 | 585 | 0.300 | 0.170 | 0.053 | 0.079 | 0.9    | 88        | 12        |           |                |  |
| LGT        | 159    | 0.3   | 100 | 0.7    | 0.5   | 180 | 18  | 10  | 499 | 0.300 | 0.170 | 0.056 | 0.079 | 0.9    | 89        | 11        |           |                |  |
| MRA        | 178    | 0.3   | 100 | 0.6    | 0.5   | 109 | 19  | 9.3 | 610 | 0.300 | 0.180 | 0.051 | 0.080 | 0.9    | 48        | 13        | 13        | 26             |  |
| MRH        | 178    | 0.3   | 100 | 0.6    | 0.5   | 114 | 19  | 9.4 | 613 | 0.300 | 0.180 | 0.049 | 0.080 | 0.9    | 36        | 13        | 26        | 26             |  |
| MRT        | 176    | 0.3   | 100 | 0.6    | 0.5   | 155 | 18  | 9.9 | 540 | 0.300 | 0.180 | 0.052 | 0.079 | 0.9    | 53        | 12        | 12        | 23             |  |
| Other      | 162    | 0.3   | 100 | 0.6    | 0.5   | 119 | 18  | 9.5 | 608 | 0.300 | 0.170 | 0.051 | 0.079 | 0.9    | 77        | 12        | 12        |                |  |
| URBAN      | 162    | 0.3   | 100 | 0.6    | 0.5   | 119 | 18  | 9.5 | 608 | 0.300 | 0.170 | 0.051 | 0.079 | 0.9    | 77        | 12        | 12        |                |  |
| <b>SEA</b> |        |       |     |        |       |     |     |     |     |       |       |       |       |        |           |           |           |                |  |
| LGA        | 241    | 0.3   | 100 | 0.6    | 0.5   | 145 | 18  | 11  | 528 | 0.300 | 0.210 | 0.049 | 0.079 | 0.9    | 12        |           |           | 88             |  |
| LGH        | 241    | 0.3   | 100 | 0.6    | 0.5   | 145 | 18  | 11  | 528 | 0.300 | 0.210 | 0.049 | 0.079 | 0.9    | 12        |           |           | 88             |  |
| LGT        | 241    | 0.3   | 100 | 0.6    | 0.5   | 145 | 18  | 11  | 528 | 0.300 | 0.210 | 0.049 | 0.079 | 0.9    | 0         | 12        |           | 88             |  |
| MRA        | 207    | 0.3   | 100 | 0.6    | 0.5   | 163 | 19  | 10  | 573 | 0.300 | 0.200 | 0.051 | 0.080 | 0.9    | 6         | 12        | 25        | 57             |  |
| MRH        | 188    | 0.3   | 100 | 0.6    | 0.5   | 176 | 19  | 10  | 592 | 0.300 | 0.190 | 0.055 | 0.080 | 0.9    | 15        | 13        | 38        | 34             |  |
| MRT        | 189    | 0.3   | 100 | 0.6    | 0.5   | 174 | 19  | 10  | 599 | 0.300 | 0.190 | 0.052 | 0.081 | 0.9    | 8         | 13        | 40        | 38             |  |
| Other      | 241    | 0.3   | 100 | 0.6    | 0.5   | 145 | 18  | 11  | 529 | 0.300 | 0.210 | 0.049 | 0.079 | 0.9    | 12        |           |           | 88             |  |
| URBAN      | 241    | 0.3   | 100 | 0.6    | 0.5   | 145 | 18  | 11  | 529 | 0.300 | 0.210 | 0.049 | 0.079 | 0.9    | 12        |           |           | 88             |  |
| <b>SSA</b> |        |       |     |        |       |     |     |     |     |       |       |       |       |        |           |           |           |                |  |
| LGA        | 174    | 0.3   | 100 | 0.6    | 0.5   | 137 | 19  | 9.7 | 572 | 0.300 | 0.180 | 0.050 | 0.080 | 0.9    | 71        | 12        | 3         | 14             |  |
| LGH        | 166    | 0.3   | 100 | 0.7    | 0.5   | 138 | 18  | 9.8 | 577 | 0.300 | 0.170 | 0.051 | 0.079 | 0.9    | 82        | 12        |           | 6              |  |
| LGT        | 215    | 0.3   | 100 | 0.6    | 0.5   | 144 | 18  | 10  | 540 | 0.300 | 0.200 | 0.051 | 0.079 | 0.9    | 31        | 12        |           | 57             |  |
| MRA        | 166    | 0.3   | 100 | 0.6    | 0.5   | 121 | 18  | 9   | 617 | 0.300 | 0.170 | 0.049 | 0.079 | 0.9    | 55        | 12        | 31        | 2              |  |
| MRH        | 191    | 0.3   | 100 | 0.6    | 0.5   | 156 | 20  | 9.9 | 572 | 0.300 | 0.180 | 0.050 | 0.094 | 0.9    | 51        | 16        | 23        | 10             |  |
| MRT        | 160    | 0.3   | 100 | 0.6    | 0.5   | 149 | 17  | 9.8 | 607 | 0.300 | 0.170 | 0.052 | 0.079 | 0.9    | 64        | 11        | 20        | 5              |  |
| Other      | 168    | 0.3   | 100 | 0.6    | 0.5   | 118 | 19  | 9.5 | 597 | 0.300 | 0.170 | 0.054 | 0.081 | 0.9    | 80        | 12        |           | 7              |  |
| URBAN      | 186    | 0.3   | 100 | 0.6    | 0.5   | 116 | 19  | 9.6 | 587 | 0.300 | 0.180 | 0.053 | 0.084 | 0.9    | 62        | 12        |           | 26             |  |



|            | 90iCHO | 90iCP | Ash | degNDF | degCP | CP  | Fat | ME  | NDF | k1    | k4    | k2    | k5    | Starch | Grass (%) | grain (%) | stover (%) | occasional (%) |  |
|------------|--------|-------|-----|--------|-------|-----|-----|-----|-----|-------|-------|-------|-------|--------|-----------|-----------|------------|----------------|--|
| <b>WRD</b> |        |       |     |        |       |     |     |     |     |       |       |       |       |        |           |           |            |                |  |
| LGA        | 167    | 0.3   | 100 | 0.7    | 0.5   | 134 | 19  | 9.6 | 582 | 0.300 | 0.170 | 0.052 | 0.079 | 0.9    | 74        | 12        | 1          | 13             |  |
| LGH        | 178    | 0.3   | 100 | 0.6    | 0.5   | 139 | 22  | 9.9 | 564 | 0.300 | 0.170 | 0.056 | 0.079 | 0.9    | 78        | 11        |            | 10             |  |
| LGT        | 235    | 0.3   | 93  | 0.7    | 0.5   | 138 | 22  | 11  | 533 | 0.300 | 0.200 | 0.056 | 0.083 | 0.9    | 24        | 16        |            | 60             |  |
| MRA        | 191    | 0.3   | 100 | 0.6    | 0.5   | 131 | 21  | 9.7 | 578 | 0.300 | 0.180 | 0.053 | 0.085 | 0.9    | 49        | 17        | 18         | 17             |  |
| MRH        | 192    | 0.3   | 99  | 0.6    | 0.5   | 144 | 20  | 10  | 573 | 0.300 | 0.180 | 0.054 | 0.086 | 0.9    | 45        | 14        | 19         | 21             |  |
| MRT        | 232    | 0.3   | 97  | 0.7    | 0.5   | 147 | 24  | 11  | 517 | 0.300 | 0.210 | 0.057 | 0.086 | 0.9    | 21        | 18        | 4          | 58             |  |
| Other      | 203    | 0.3   | 100 | 0.6    | 0.5   | 129 | 22  | 10  | 561 | 0.300 | 0.190 | 0.055 | 0.083 | 0.9    | 49        | 13        | 2          | 36             |  |
| URBAN      | 213    | 0.3   | 100 | 0.6    | 0.5   | 127 | 26  | 10  | 550 | 0.300 | 0.190 | 0.058 | 0.086 | 0.9    | 50        | 17        | 2          | 31             |  |

Table S 11. Ruminant numbers, productivity per tropical livestock unit and associated manure, N excretion and GHG emissions for different species, production systems and regions (BOVD = dairy cattle, BOVO = beef cattle and dairy followers, SGTD = small ruminants dairy, SGTO = small ruminants for meat; BW = body weight)

|             | Number<br>(productive) | Number<br>(herd) | Average<br>milk<br>yield | Weight<br>gain per<br>day | Manure                            | N<br>Excretion                    | Enteric<br>fermen-<br>tation<br>CH <sub>4</sub>      | Manure<br>mgmt<br>CH <sub>4</sub>                    | Manure<br>mgmt<br>N <sub>2</sub> O                   | Manure<br>cropland<br>N <sub>2</sub> O               | Manure<br>grassland<br>N <sub>2</sub> O              |
|-------------|------------------------|------------------|--------------------------|---------------------------|-----------------------------------|-----------------------------------|------------------------------------------------------|------------------------------------------------------|------------------------------------------------------|------------------------------------------------------|------------------------------------------------------|
|             | (1000)                 | (1000)           | (kg/d)                   | (g/d)                     | (kg/<br>kgBW <sup>0.75</sup> /yr) | (kg/<br>kgBW <sup>0.75</sup> /yr) | (kgCO <sub>2</sub> -eq/<br>kgBW <sup>0.75</sup> /yr) |
| <b>BOVD</b> |                        |                  |                          |                           |                                   |                                   |                                                      |                                                      |                                                      |                                                      |                                                      |
| <b>CIS</b>  |                        |                  |                          |                           |                                   |                                   |                                                      |                                                      |                                                      |                                                      |                                                      |
| ANY         | 18727                  | 25607            | 9.1                      |                           | 9.72                              | 0.44                              | 12.66                                                | 0.65                                                 | 1.60                                                 | 1.03                                                 | 2.52                                                 |
| LGA         | 329                    | 494              | 3.0                      |                           | 8.82                              | 0.29                              | 9.50                                                 | 0.07                                                 | 2.05                                                 | 0.78                                                 | 0.35                                                 |
| LGT         | 2859                   | 3989             | 7.2                      |                           | 9.25                              | 0.39                              | 12.14                                                | 0.24                                                 | 1.65                                                 | 0.77                                                 | 1.72                                                 |
| MRA         | 725                    | 1021             | 8.7                      |                           | 7.86                              | 0.37                              | 10.34                                                | 0.17                                                 | 1.90                                                 | 0.60                                                 | 0.64                                                 |
| MRH         | 48                     | 65               | 9.0                      |                           | 8.04                              | 0.38                              | 10.44                                                | 1.27                                                 | 1.60                                                 | 0.74                                                 | 2.39                                                 |
| MRT         | 9828                   | 13104            | 10.8                     |                           | 9.80                              | 0.50                              | 13.59                                                | 0.85                                                 | 1.65                                                 | 1.25                                                 | 2.93                                                 |
| Other       | 4191                   | 5884             | 7.3                      |                           | 10.25                             | 0.39                              | 11.91                                                | 0.66                                                 | 1.40                                                 | 0.90                                                 | 2.73                                                 |
| URBAN       | 748                    | 1050             | 7.3                      |                           | 10.35                             | 0.39                              | 12.03                                                | 0.66                                                 | 1.42                                                 | 0.91                                                 | 2.75                                                 |
| <b>EAS</b>  |                        |                  |                          |                           |                                   |                                   |                                                      |                                                      |                                                      |                                                      |                                                      |
| ANY         | 7328                   | 10622            | 7.1                      |                           | 11.22                             | 0.62                              | 14.89                                                | 0.48                                                 | 2.60                                                 | 2.36                                                 | 0.41                                                 |
| LGA         | 32                     | 51               | 0.5                      |                           | 9.74                              | 0.29                              | 10.58                                                | 0.02                                                 | 2.30                                                 | 0.51                                                 | 0.21                                                 |
| LGH         | 1                      | 2                | 2.5                      |                           | 12.00                             | 0.49                              | 14.99                                                | 0.19                                                 | 3.45                                                 | 0.60                                                 | 0.52                                                 |
| LGT         | 188                    | 277              | 4.7                      |                           | 10.35                             | 0.63                              | 13.84                                                | 0.14                                                 | 3.88                                                 | 2.55                                                 | 0.23                                                 |
| MRA         | 149                    | 229              | 0.8                      |                           | 11.71                             | 0.38                              | 12.05                                                | 0.11                                                 | 1.61                                                 | 2.39                                                 | 0.25                                                 |
| MRH         | 1291                   | 1874             | 2.3                      |                           | 11.07                             | 0.40                              | 11.63                                                | 0.37                                                 | 2.44                                                 | 0.69                                                 | 0.48                                                 |
| MRT         | 3006                   | 4209             | 7.4                      |                           | 10.87                             | 0.71                              | 14.92                                                | 0.66                                                 | 2.36                                                 | 2.28                                                 | 0.48                                                 |
| Other       | 1993                   | 2981             | 9.3                      |                           | 11.84                             | 0.63                              | 16.42                                                | 0.37                                                 | 2.85                                                 | 3.14                                                 | 0.34                                                 |
| URBAN       | 669                    | 1000             | 10.7                     |                           | 11.40                             | 0.68                              | 17.23                                                | 0.39                                                 | 3.09                                                 | 3.40                                                 | 0.33                                                 |
| <b>EUR</b>  |                        |                  |                          |                           |                                   |                                   |                                                      |                                                      |                                                      |                                                      |                                                      |
| ANY         | 2426                   | 3503             | 14.4                     |                           | 9.19                              | 0.55                              | 14.02                                                | 0.85                                                 | 2.05                                                 | 1.24                                                 | 2.40                                                 |
| LGA         | 34                     | 51               | 7.8                      |                           | 9.42                              | 0.38                              | 11.39                                                | 0.09                                                 | 2.67                                                 | 1.01                                                 | 0.38                                                 |
| LGH         | 53                     | 77               | 20.1                     |                           | 9.48                              | 0.46                              | 12.58                                                | 0.74                                                 | 1.94                                                 | 0.97                                                 | 1.78                                                 |
| LGT         | 259                    | 386              | 20.3                     |                           | 9.79                              | 0.86                              | 17.54                                                | 0.53                                                 | 3.65                                                 | 1.71                                                 | 1.89                                                 |
| MRA         | 95                     | 133              | 8.9                      |                           | 8.54                              | 0.33                              | 11.41                                                | 0.15                                                 | 1.71                                                 | 0.54                                                 | 0.68                                                 |
| MRH         | 152                    | 208              | 20.0                     |                           | 9.76                              | 0.41                              | 11.91                                                | 1.38                                                 | 1.75                                                 | 0.81                                                 | 2.87                                                 |
| MRT         | 750                    | 1022             | 21.5                     |                           | 9.72                              | 0.45                              | 12.57                                                | 0.77                                                 | 1.49                                                 | 1.13                                                 | 2.88                                                 |
| Other       | 813                    | 1212             | 16.1                     |                           | 8.65                              | 0.57                              | 14.72                                                | 0.97                                                 | 2.07                                                 | 1.33                                                 | 2.37                                                 |
| URBAN       | 270                    | 414              | 17.6                     |                           | 8.63                              | 0.62                              | 15.26                                                | 1.05                                                 | 2.24                                                 | 1.44                                                 | 2.38                                                 |
| <b>LAM</b>  |                        |                  |                          |                           |                                   |                                   |                                                      |                                                      |                                                      |                                                      |                                                      |
| ANY         | 21677                  | 32626            | 5.7                      |                           | 9.33                              | 0.36                              | 10.24                                                | 0.26                                                 | 2.46                                                 | 0.66                                                 | 0.68                                                 |
| LGA         | 437                    | 656              | 0.6                      |                           | 9.60                              | 0.30                              | 8.41                                                 | 0.06                                                 | 2.16                                                 | 0.84                                                 | 0.31                                                 |
| LGH         | 2780                   | 4169             | 3.7                      |                           | 9.96                              | 0.32                              | 10.20                                                | 0.16                                                 | 2.24                                                 | 0.91                                                 | 0.32                                                 |
| LGT         | 256                    | 397              | 8.0                      |                           | 7.31                              | 0.44                              | 9.50                                                 | 0.12                                                 | 2.68                                                 | 1.72                                                 | 0.24                                                 |
| MRA         | 1267                   | 1870             | 6.9                      |                           | 7.97                              | 0.45                              | 10.22                                                | 0.10                                                 | 2.74                                                 | 1.80                                                 | 0.26                                                 |
| MRH         | 10291                  | 15534            | 6.1                      |                           | 10.19                             | 0.37                              | 10.65                                                | 0.30                                                 | 2.59                                                 | 0.45                                                 | 0.88                                                 |
| MRT         | 944                    | 1415             | 17.8                     |                           | 6.88                              | 0.49                              | 11.76                                                | 0.32                                                 | 2.56                                                 | 1.09                                                 | 0.62                                                 |
| Other       | 4844                   | 7288             | 4.2                      |                           | 8.25                              | 0.33                              | 9.48                                                 | 0.27                                                 | 2.28                                                 | 0.53                                                 | 0.66                                                 |
| URBAN       | 858                    | 1297             | 3.9                      |                           | 8.17                              | 0.32                              | 9.24                                                 | 0.26                                                 | 2.20                                                 | 0.51                                                 | 0.65                                                 |

|            | Number<br>(productive) | Number<br>(herd) | Average<br>milk<br>yield | Weight<br>gain per<br>day | Manure                            | N<br>Excretion                    | Enteric<br>fermen-<br>tation<br>CH <sub>4</sub>      | Manure<br>mgmt<br>CH <sub>4</sub>                    | Manure<br>mgmt<br>N <sub>2</sub> O                   | Manure<br>cropland<br>N <sub>2</sub> O               | Manure<br>grassland<br>N <sub>2</sub> O              |
|------------|------------------------|------------------|--------------------------|---------------------------|-----------------------------------|-----------------------------------|------------------------------------------------------|------------------------------------------------------|------------------------------------------------------|------------------------------------------------------|------------------------------------------------------|
|            | (1000)                 | (1000)           | (kg/d)                   | (g/d)                     | (kg/<br>kgBW <sup>0.75</sup> /yr) | (kg/<br>kgBW <sup>0.75</sup> /yr) | (kgCO <sub>2</sub> -eq/<br>kgBW <sup>0.75</sup> /yr) |
| <b>MNA</b> |                        |                  |                          |                           |                                   |                                   |                                                      |                                                      |                                                      |                                                      |                                                      |
| ANY        | 10110                  | 15121            | 5.4                      |                           | 10.95                             | 0.49                              | 13.98                                                | 0.31                                                 | 2.57                                                 | 1.71                                                 | 0.61                                                 |
| LGA        | 2470                   | 3801             | 2.3                      |                           | 10.91                             | 0.43                              | 13.44                                                | 0.08                                                 | 3.04                                                 | 1.22                                                 | 0.34                                                 |
| LGH        | 0                      | 0                | 3.4                      |                           | 9.23                              | 0.39                              | 11.90                                                | 0.27                                                 | 2.37                                                 | 1.56                                                 | 0.30                                                 |
| LGT        | 63                     | 90               | 3.4                      |                           | 11.32                             | 0.67                              | 13.88                                                | 0.39                                                 | 3.05                                                 | 1.53                                                 | 1.10                                                 |
| MRA        | 5056                   | 7546             | 6.0                      |                           | 10.66                             | 0.46                              | 14.00                                                | 0.16                                                 | 2.40                                                 | 1.81                                                 | 0.40                                                 |
| MRH        | 188                    | 276              | 8.2                      |                           | 11.59                             | 0.63                              | 15.76                                                | 1.74                                                 | 2.69                                                 | 1.43                                                 | 1.58                                                 |
| MRT        | 532                    | 760              | 8.7                      |                           | 11.51                             | 0.77                              | 15.11                                                | 1.21                                                 | 2.54                                                 | 2.02                                                 | 1.84                                                 |
| Other      | 816                    | 1200             | 6.9                      |                           | 11.72                             | 0.57                              | 14.34                                                | 0.73                                                 | 2.30                                                 | 1.84                                                 | 1.36                                                 |
| URBAN      | 985                    | 1449             | 6.9                      |                           | 11.37                             | 0.54                              | 13.91                                                | 0.46                                                 | 2.41                                                 | 2.24                                                 | 0.83                                                 |
| <b>NAM</b> |                        |                  |                          |                           |                                   |                                   |                                                      |                                                      |                                                      |                                                      |                                                      |
| ANY        | 10223                  | 16566            | 27.6                     |                           | 11.44                             | 1.10                              | 23.31                                                | 0.93                                                 | 6.13                                                 | 2.78                                                 | 2.02                                                 |
| MRA        | 2061                   | 3255             | 22.2                     |                           | 11.75                             | 1.11                              | 22.07                                                | 0.30                                                 | 6.82                                                 | 4.40                                                 | 0.49                                                 |
| MRH        | 690                    | 1184             | 27.1                     |                           | 11.82                             | 1.15                              | 23.79                                                | 1.75                                                 | 7.04                                                 | 1.79                                                 | 2.81                                                 |
| MRT        | 3955                   | 6591             | 32.8                     |                           | 12.17                             | 1.21                              | 25.46                                                | 1.21                                                 | 6.27                                                 | 2.32                                                 | 2.85                                                 |
| Other      | 2753                   | 4311             | 24.9                     |                           | 10.42                             | 0.97                              | 21.63                                                | 0.81                                                 | 5.42                                                 | 2.57                                                 | 1.83                                                 |
| URBAN      | 763                    | 1225             | 25.0                     |                           | 10.22                             | 0.95                              | 21.09                                                | 0.80                                                 | 5.30                                                 | 2.51                                                 | 1.81                                                 |
| <b>OCE</b> |                        |                  |                          |                           |                                   |                                   |                                                      |                                                      |                                                      |                                                      |                                                      |
| ANY        | 5038                   | 7577             | 11.6                     |                           | 13.96                             | 1.07                              | 20.35                                                | 0.68                                                 | 7.34                                                 | 2.14                                                 | 1.59                                                 |
| LGA        | 1033                   | 1549             | 7.9                      |                           | 14.16                             | 0.86                              | 18.38                                                | 0.18                                                 | 6.07                                                 | 2.37                                                 | 0.85                                                 |
| LGH        | 697                    | 1045             | 16.1                     |                           | 15.18                             | 0.91                              | 23.43                                                | 0.47                                                 | 6.44                                                 | 2.62                                                 | 0.92                                                 |
| LGT        | 70                     | 108              | 21.6                     |                           | 14.39                             | 0.96                              | 22.63                                                | 0.27                                                 | 5.89                                                 | 3.78                                                 | 0.90                                                 |
| MRA        | 315                    | 465              | 8.4                      |                           | 12.73                             | 0.68                              | 18.89                                                | 0.15                                                 | 4.18                                                 | 2.75                                                 | 0.77                                                 |
| MRH        | 790                    | 1193             | 16.3                     |                           | 16.26                             | 0.87                              | 23.01                                                | 0.72                                                 | 6.14                                                 | 1.07                                                 | 2.63                                                 |
| MRT        | 18                     | 26               | 20.1                     |                           | 14.04                             | 0.71                              | 21.70                                                | 0.45                                                 | 3.66                                                 | 1.56                                                 | 2.32                                                 |
| Other      | 1047                   | 1575             | 9.3                      |                           | 12.58                             | 0.70                              | 18.14                                                | 0.56                                                 | 4.80                                                 | 1.12                                                 | 1.87                                                 |
| URBAN      | 1068                   | 1615             | 11.3                     |                           | 12.95                             | 1.99                              | 20.71                                                | 1.59                                                 | 13.61                                                | 3.15                                                 | 1.95                                                 |
| <b>SAS</b> |                        |                  |                          |                           |                                   |                                   |                                                      |                                                      |                                                      |                                                      |                                                      |
| ANY        | 42377                  | 64341            | 3.7                      |                           | 14.47                             | 0.25                              | 12.71                                                | 0.11                                                 | 1.21                                                 | 1.29                                                 | 0.63                                                 |
| LGA        | 1429                   | 2286             | 0.5                      |                           | 11.94                             | 0.36                              | 12.96                                                | 0.03                                                 | 2.88                                                 | 0.63                                                 | 0.38                                                 |
| LGH        | 20                     | 31               | 3.4                      |                           | 13.69                             | 0.58                              | 17.65                                                | 0.23                                                 | 4.08                                                 | 0.71                                                 | 1.18                                                 |
| LGT        | 21                     | 31               | 5.3                      |                           | 15.09                             | 1.03                              | 19.30                                                | 0.23                                                 | 6.29                                                 | 4.12                                                 | 0.49                                                 |
| MRA        | 26649                  | 40999            | 3.7                      |                           | 14.53                             | 0.25                              | 12.68                                                | 0.07                                                 | 1.06                                                 | 1.57                                                 | 0.47                                                 |
| MRH        | 5368                   | 7779             | 4.9                      |                           | 15.14                             | 0.33                              | 14.61                                                | 0.30                                                 | 2.01                                                 | 0.56                                                 | 1.31                                                 |
| MRT        | 661                    | 918              | 8.2                      |                           | 15.39                             | 0.41                              | 17.36                                                | 0.38                                                 | 1.34                                                 | 1.30                                                 | 1.35                                                 |
| Other      | 5127                   | 7661             | 2.9                      |                           | 14.19                             | 0.19                              | 11.11                                                | 0.11                                                 | 0.84                                                 | 0.93                                                 | 0.68                                                 |
| URBAN      | 3102                   | 4636             | 2.9                      |                           | 14.20                             | 0.18                              | 11.12                                                | 0.11                                                 | 0.83                                                 | 0.91                                                 | 0.68                                                 |
| <b>SEA</b> |                        |                  |                          |                           |                                   |                                   |                                                      |                                                      |                                                      |                                                      |                                                      |
| ANY        | 2254                   | 3323             | 2.5                      |                           | 9.66                              | 0.47                              | 10.92                                                | 0.31                                                 | 2.60                                                 | 1.47                                                 | 0.57                                                 |
| LGA        | 1                      | 2                | 0.5                      |                           | 8.97                              | 0.26                              | 9.74                                                 | 0.02                                                 | 2.10                                                 | 0.46                                                 | 0.29                                                 |
| LGH        | 161                    | 247              | 3.4                      |                           | 10.36                             | 0.43                              | 13.35                                                | 0.17                                                 | 3.06                                                 | 0.53                                                 | 0.90                                                 |
| LGT        | 477                    | 701              | 1.2                      |                           | 10.62                             | 0.36                              | 10.87                                                | 0.08                                                 | 2.20                                                 | 1.44                                                 | 0.34                                                 |
| MRA        | 112                    | 172              | 2.7                      |                           | 8.84                              | 0.49                              | 10.81                                                | 0.14                                                 | 2.08                                                 | 3.08                                                 | 0.29                                                 |
| MRH        | 708                    | 1026             | 4.0                      |                           | 8.49                              | 0.64                              | 10.77                                                | 0.59                                                 | 3.91                                                 | 1.10                                                 | 0.75                                                 |
| MRT        | 142                    | 197              | 2.4                      |                           | 7.77                              | 0.58                              | 10.40                                                | 0.54                                                 | 1.92                                                 | 1.85                                                 | 0.68                                                 |
| Other      | 620                    | 927              | 1.4                      |                           | 10.61                             | 0.35                              | 10.67                                                | 0.20                                                 | 1.60                                                 | 1.76                                                 | 0.51                                                 |
| URBAN      | 33                     | 50               | 1.4                      |                           | 10.62                             | 0.35                              | 10.68                                                | 0.20                                                 | 1.60                                                 | 1.76                                                 | 0.51                                                 |

|            | Number<br>(productive) | Number<br>(herd) | Average<br>milk<br>yield | Weight<br>gain per<br>day | Manure                            | N<br>Excretion                    | Enteric<br>fermen-<br>tation<br>CH <sub>4</sub>      | Manure<br>mgmt<br>CH <sub>4</sub>                    | Manure<br>mgmt<br>N <sub>2</sub> O                   | Manure<br>cropland<br>N <sub>2</sub> O               | Manure<br>grassland<br>N <sub>2</sub> O              |
|------------|------------------------|------------------|--------------------------|---------------------------|-----------------------------------|-----------------------------------|------------------------------------------------------|------------------------------------------------------|------------------------------------------------------|------------------------------------------------------|------------------------------------------------------|
|            | (1000)                 | (1000)           | (kg/d)                   | (g/d)                     | (kg/<br>kgBW <sup>0.75</sup> /yr) | (kg/<br>kgBW <sup>0.75</sup> /yr) | (kgCO <sub>2</sub> -eq/<br>kgBW <sup>0.75</sup> /yr) |
| <b>SSA</b> |                        |                  |                          |                           |                                   |                                   |                                                      |                                                      |                                                      |                                                      |                                                      |
| ANY        | 19755                  | 30717            | 1.2                      |                           | 14.22                             | 0.47                              | 13.95                                                | 0.27                                                 | 2.51                                                 | 1.83                                                 | 0.62                                                 |
| LGA        | 5772                   | 8838             | 0.6                      |                           | 14.00                             | 0.43                              | 14.46                                                | 0.08                                                 | 3.02                                                 | 1.22                                                 | 0.45                                                 |
| LGH        | 621                    | 1032             | 1.6                      |                           | 14.84                             | 0.52                              | 15.43                                                | 0.36                                                 | 3.16                                                 | 2.08                                                 | 0.48                                                 |
| LGT        | 281                    | 471              | 5.1                      |                           | 12.58                             | 0.67                              | 14.57                                                | 0.20                                                 | 4.12                                                 | 2.63                                                 | 0.41                                                 |
| MRA        | 7058                   | 10584            | 0.6                      |                           | 16.27                             | 0.48                              | 14.19                                                | 0.14                                                 | 2.49                                                 | 2.48                                                 | 0.52                                                 |
| MRH        | 2101                   | 3382             | 1.4                      |                           | 12.85                             | 0.47                              | 12.45                                                | 0.93                                                 | 1.98                                                 | 1.22                                                 | 1.10                                                 |
| MRT        | 2508                   | 4150             | 3.8                      |                           | 11.32                             | 0.50                              | 12.99                                                | 0.52                                                 | 1.64                                                 | 1.57                                                 | 0.98                                                 |
| Other      | 1213                   | 1942             | 2.6                      |                           | 11.77                             | 0.45                              | 13.53                                                | 0.29                                                 | 2.13                                                 | 2.11                                                 | 0.58                                                 |
| URBAN      | 200                    | 317              | 3.6                      |                           | 13.31                             | 0.56                              | 15.54                                                | 0.36                                                 | 2.67                                                 | 2.63                                                 | 0.66                                                 |
| <b>WRD</b> |                        |                  |                          |                           |                                   |                                   |                                                      |                                                      |                                                      |                                                      |                                                      |
| ANY        | 139914                 | 210001           | 6.9                      |                           | 12.04                             | 0.45                              | 13.48                                                | 0.36                                                 | 2.35                                                 | 1.40                                                 | 1.08                                                 |
| LGA        | 11538                  | 17727            | 1.7                      |                           | 12.75                             | 0.44                              | 13.91                                                | 0.08                                                 | 3.19                                                 | 1.21                                                 | 0.44                                                 |
| LGH        | 4333                   | 6605             | 5.5                      |                           | 11.31                             | 0.43                              | 12.80                                                | 0.24                                                 | 2.95                                                 | 1.28                                                 | 0.45                                                 |
| LGT        | 4475                   | 6450             | 7.3                      |                           | 9.55                              | 0.44                              | 12.48                                                | 0.23                                                 | 2.10                                                 | 1.11                                                 | 1.42                                                 |
| MRA        | 43487                  | 66273            | 4.6                      |                           | 13.89                             | 0.36                              | 13.33                                                | 0.10                                                 | 1.77                                                 | 1.86                                                 | 0.47                                                 |
| MRH        | 21626                  | 32521            | 6.1                      |                           | 11.81                             | 0.41                              | 12.54                                                | 0.44                                                 | 2.64                                                 | 0.64                                                 | 1.10                                                 |
| MRT        | 22343                  | 32393            | 13.5                     |                           | 10.47                             | 0.63                              | 15.43                                                | 0.81                                                 | 2.46                                                 | 1.56                                                 | 2.24                                                 |
| Other      | 23417                  | 34980            | 7.9                      |                           | 10.89                             | 0.43                              | 12.88                                                | 0.42                                                 | 2.21                                                 | 1.26                                                 | 1.31                                                 |
| URBAN      | 8696                   | 13054            | 7.9                      |                           | 11.95                             | 0.58                              | 13.77                                                | 0.50                                                 | 3.28                                                 | 1.60                                                 | 1.18                                                 |

|             | Number<br>(total) | Number<br>(no<br>followers) | Average<br>milk<br>yield | Weight<br>gain per<br>day | Manure                            | N<br>Excretion                    | Enteric<br>fermen-<br>tation<br>CH <sub>4</sub>      | Manure<br>mgmt<br>CH <sub>4</sub>                    | Manure<br>mgmt<br>N <sub>2</sub> O                   | Manure<br>cropland<br>N <sub>2</sub> O               | Manure<br>grassland<br>N <sub>2</sub> O              |
|-------------|-------------------|-----------------------------|--------------------------|---------------------------|-----------------------------------|-----------------------------------|------------------------------------------------------|------------------------------------------------------|------------------------------------------------------|------------------------------------------------------|------------------------------------------------------|
|             | (1000)            | (1000)                      | (kg/d)                   | (g/d)                     | (kg/<br>kgBW <sup>0.75</sup> /yr) | (kg/<br>kgBW <sup>0.75</sup> /yr) | (kgCO <sub>2</sub> -eq/<br>kgBW <sup>0.75</sup> /yr) |
| <b>BOVO</b> |                   |                             |                          |                           |                                   |                                   |                                                      |                                                      |                                                      |                                                      |                                                      |
| <b>CIS</b>  |                   |                             |                          |                           |                                   |                                   |                                                      |                                                      |                                                      |                                                      |                                                      |
| ANY         | 21751             | 14871                       |                          | 692                       | 16.50                             | 0.96                              | 23.96                                                | 1.06                                                 | 5.10                                                 | 1.76                                                 | 4.04                                                 |
| LGA         | 400               | 235                         |                          | 245                       | 20.57                             | 0.79                              | 22.19                                                | 0.12                                                 | 6.35                                                 | 1.27                                                 | 0.80                                                 |
| LGT         | 3451              | 2321                        |                          | 468                       | 14.05                             | 0.75                              | 22.16                                                | 0.38                                                 | 3.87                                                 | 1.21                                                 | 1.63                                                 |
| MRA         | 874               | 579                         |                          | 621                       | 14.65                             | 0.84                              | 21.52                                                | 0.30                                                 | 5.15                                                 | 3.13                                                 | 0.86                                                 |
| MRH         | 41                | 24                          |                          | 774                       | 16.33                             | 1.37                              | 25.24                                                | 3.01                                                 | 8.42                                                 | 1.72                                                 | 5.17                                                 |
| MRT         | 11160             | 7884                        |                          | 1017                      | 15.38                             | 1.13                              | 25.83                                                | 1.42                                                 | 5.88                                                 | 1.96                                                 | 5.59                                                 |
| Other       | 4951              | 3257                        |                          | 244                       | 20.28                             | 0.78                              | 22.03                                                | 0.99                                                 | 4.26                                                 | 1.56                                                 | 3.35                                                 |
| URBAN       | 874               | 571                         |                          | 244                       | 20.34                             | 0.79                              | 22.09                                                | 1.00                                                 | 4.27                                                 | 1.56                                                 | 3.36                                                 |
| <b>EAS</b>  |                   |                             |                          |                           |                                   |                                   |                                                      |                                                      |                                                      |                                                      |                                                      |
| ANY         | 73315             | 70021                       |                          | 315                       | 10.40                             | 0.57                              | 13.14                                                | 0.38                                                 | 3.31                                                 | 1.30                                                 | 0.50                                                 |
| LGA         | 364               | 345                         |                          | 14                        | 9.63                              | 0.31                              | 10.44                                                | 0.03                                                 | 2.52                                                 | 0.55                                                 | 0.20                                                 |
| LGH         | 16                | 15                          |                          | 179                       | 11.80                             | 0.53                              | 14.69                                                | 0.14                                                 | 4.21                                                 | 0.94                                                 | 0.27                                                 |
| LGT         | 2130              | 2042                        |                          | 380                       | 10.09                             | 0.67                              | 13.42                                                | 0.12                                                 | 4.74                                                 | 1.92                                                 | 0.29                                                 |
| MRA         | 1694              | 1615                        |                          | 24                        | 11.52                             | 0.40                              | 11.78                                                | 0.09                                                 | 2.47                                                 | 1.62                                                 | 0.23                                                 |
| MRH         | 14113             | 13529                       |                          | 90                        | 10.57                             | 0.39                              | 10.73                                                | 0.31                                                 | 2.77                                                 | 0.48                                                 | 0.48                                                 |
| MRT         | 32543             | 31339                       |                          | 397                       | 10.02                             | 0.67                              | 13.42                                                | 0.49                                                 | 3.49                                                 | 1.49                                                 | 0.58                                                 |
| Other       | 17049             | 16061                       |                          | 357                       | 10.82                             | 0.53                              | 14.39                                                | 0.31                                                 | 3.31                                                 | 1.46                                                 | 0.44                                                 |
| URBAN       | 5406              | 5075                        |                          | 366                       | 10.87                             | 0.55                              | 14.51                                                | 0.33                                                 | 3.44                                                 | 1.52                                                 | 0.45                                                 |
| <b>EUR</b>  |                   |                             |                          |                           |                                   |                                   |                                                      |                                                      |                                                      |                                                      |                                                      |
| ANY         | 2598              | 1522                        |                          | 873                       | 22.01                             | 1.73                              | 35.34                                                | 2.02                                                 | 9.33                                                 | 3.22                                                 | 6.22                                                 |
| LGA         | 31                | 14                          |                          | 249                       | 43.87                             | 1.83                              | 47.95                                                | 0.28                                                 | 14.66                                                | 2.93                                                 | 1.75                                                 |
| LGH         | 43                | 18                          |                          | 440                       | 41.04                             | 3.14                              | 52.41                                                | 4.13                                                 | 16.25                                                | 5.45                                                 | 3.93                                                 |
| LGT         | 425               | 298                         |                          | 514                       | 13.62                             | 1.18                              | 21.48                                                | 0.60                                                 | 6.11                                                 | 1.91                                                 | 1.66                                                 |
| MRA         | 86                | 47                          |                          | 621                       | 32.71                             | 1.91                              | 48.05                                                | 0.67                                                 | 11.74                                                | 7.13                                                 | 1.91                                                 |
| MRH         | 95                | 39                          |                          | 880                       | 43.80                             | 3.69                              | 66.03                                                | 8.09                                                 | 22.59                                                | 4.61                                                 | 14.29                                                |
| MRT         | 644               | 373                         |                          | 1131                      | 26.10                             | 2.16                              | 44.48                                                | 2.70                                                 | 11.21                                                | 3.73                                                 | 10.09                                                |
| Other       | 959               | 560                         |                          | 818                       | 20.50                             | 1.51                              | 32.21                                                | 1.93                                                 | 8.23                                                 | 3.01                                                 | 5.88                                                 |
| URBAN       | 316               | 172                         |                          | 1180                      | 20.93                             | 1.76                              | 36.51                                                | 2.24                                                 | 9.59                                                 | 3.51                                                 | 6.73                                                 |
| <b>LAM</b>  |                   |                             |                          |                           |                                   |                                   |                                                      |                                                      |                                                      |                                                      |                                                      |
| ANY         | 160404            | 149455                      |                          | 253                       | 10.44                             | 0.46                              | 12.08                                                | 0.22                                                 | 3.64                                                 | 0.91                                                 | 0.40                                                 |
| LGA         | 7709              | 7490                        |                          | 131                       | 10.07                             | 0.39                              | 10.68                                                | 0.05                                                 | 3.12                                                 | 0.65                                                 | 0.35                                                 |
| LGH         | 20797             | 19407                       |                          | 275                       | 10.37                             | 0.50                              | 13.35                                                | 0.17                                                 | 3.98                                                 | 0.85                                                 | 0.41                                                 |
| LGT         | 2089              | 1949                        |                          | 268                       | 7.05                              | 0.36                              | 8.95                                                 | 0.08                                                 | 2.56                                                 | 1.02                                                 | 0.28                                                 |
| MRA         | 8494              | 7891                        |                          | 116                       | 10.46                             | 0.42                              | 10.82                                                | 0.07                                                 | 2.94                                                 | 1.20                                                 | 0.36                                                 |
| MRH         | 74296             | 69053                       |                          | 278                       | 10.97                             | 0.49                              | 12.71                                                | 0.26                                                 | 3.90                                                 | 0.87                                                 | 0.44                                                 |
| MRT         | 4550              | 4078                        |                          | 848                       | 7.12                              | 0.47                              | 10.17                                                | 0.27                                                 | 2.91                                                 | 1.98                                                 | 0.43                                                 |
| Other       | 36502             | 34059                       |                          | 153                       | 10.19                             | 0.42                              | 10.85                                                | 0.23                                                 | 3.25                                                 | 0.84                                                 | 0.35                                                 |
| URBAN       | 5968              | 5529                        |                          | 378                       | 9.59                              | 0.53                              | 13.33                                                | 0.29                                                 | 4.11                                                 | 1.07                                                 | 0.43                                                 |
| <b>MNA</b>  |                   |                             |                          |                           |                                   |                                   |                                                      |                                                      |                                                      |                                                      |                                                      |
| ANY         | 12151             | 7195                        |                          | 477                       | 23.82                             | 1.22                              | 30.47                                                | 0.45                                                 | 7.95                                                 | 3.72                                                 | 1.35                                                 |
| LGA         | 3423              | 2092                        |                          | 224                       | 23.80                             | 1.09                              | 30.78                                                | 0.13                                                 | 8.71                                                 | 1.85                                                 | 0.85                                                 |
| LGH         | 0                 | 0                           |                          | 332                       | 25.19                             | 1.22                              | 30.46                                                | 0.69                                                 | 8.63                                                 | 3.52                                                 | 1.02                                                 |
| LGT         | 69                | 42                          |                          | 282                       | 20.05                             | 1.32                              | 24.83                                                | 0.60                                                 | 7.40                                                 | 2.48                                                 | 1.03                                                 |
| MRA         | 5917              | 3427                        |                          | 605                       | 24.36                             | 1.31                              | 31.43                                                | 0.33                                                 | 8.03                                                 | 5.18                                                 | 1.12                                                 |
| MRH         | 187               | 98                          |                          | 659                       | 25.73                             | 1.47                              | 33.77                                                | 2.63                                                 | 9.02                                                 | 2.15                                                 | 3.83                                                 |
| MRT         | 588               | 360                         |                          | 608                       | 19.76                             | 1.40                              | 26.20                                                | 1.53                                                 | 7.26                                                 | 2.61                                                 | 3.07                                                 |
| Other       | 841               | 457                         |                          | 376                       | 24.11                             | 1.10                              | 27.94                                                | 0.99                                                 | 6.24                                                 | 2.92                                                 | 2.32                                                 |
| URBAN       | 1183              | 719                         |                          | 554                       | 23.17                             | 1.14                              | 28.71                                                | 0.70                                                 | 6.66                                                 | 3.60                                                 | 2.02                                                 |

|            | Number<br>(total) | Number<br>(no<br>followers) | Average<br>milk<br>yield | Weight<br>gain per<br>day | Manure                            | N<br>Excretion                    | Enteric<br>fermen-<br>tation<br>CH <sub>4</sub>      | Manure<br>mgmt<br>CH <sub>4</sub>                    | Manure<br>mgmt<br>N <sub>2</sub> O                   | Manure<br>cropland<br>N <sub>2</sub> O               | Manure<br>grassland<br>N <sub>2</sub> O              |
|------------|-------------------|-----------------------------|--------------------------|---------------------------|-----------------------------------|-----------------------------------|------------------------------------------------------|------------------------------------------------------|------------------------------------------------------|------------------------------------------------------|------------------------------------------------------|
|            | (1000)            | (1000)                      | (kg/d)                   | (g/d)                     | (kg/<br>kgBW <sup>0.75</sup> /yr) | (kg/<br>kgBW <sup>0.75</sup> /yr) | (kgCO <sub>2</sub> -eq/<br>kgBW <sup>0.75</sup> /yr) |
| <b>NAM</b> |                   |                             |                          |                           |                                   |                                   |                                                      |                                                      |                                                      |                                                      |                                                      |
| ANY        | 100215            | 93871                       |                          | 637                       | 12.35                             | 0.65                              | 17.19                                                | 0.42                                                 | 4.35                                                 | 2.17                                                 | 0.79                                                 |
| LGA        | 11870             | 11870                       |                          | 245                       | 13.37                             | 0.50                              | 14.42                                                | 0.06                                                 | 3.99                                                 | 0.83                                                 | 0.58                                                 |
| LGH        | 3064              | 3064                        |                          | 294                       | 13.10                             | 0.57                              | 14.84                                                | 0.24                                                 | 4.60                                                 | 0.35                                                 | 0.60                                                 |
| LGT        | 10634             | 10634                       |                          | 546                       | 9.21                              | 0.36                              | 11.69                                                | 0.13                                                 | 2.21                                                 | 1.40                                                 | 0.60                                                 |
| MRA        | 8167              | 6974                        |                          | 953                       | 13.36                             | 0.86                              | 20.83                                                | 0.17                                                 | 6.10                                                 | 2.44                                                 | 1.01                                                 |
| MRH        | 3494              | 3001                        |                          | 1010                      | 10.37                             | 0.78                              | 19.11                                                | 0.53                                                 | 6.22                                                 | 1.34                                                 | 0.98                                                 |
| MRT        | 28561             | 25925                       |                          | 1163                      | 10.72                             | 0.84                              | 20.36                                                | 0.73                                                 | 5.17                                                 | 3.33                                                 | 1.02                                                 |
| Other      | 27121             | 25563                       |                          | 375                       | 14.22                             | 0.61                              | 16.73                                                | 0.44                                                 | 3.95                                                 | 2.15                                                 | 0.69                                                 |
| URBAN      | 7303              | 6840                        |                          | 375                       | 14.20                             | 0.61                              | 16.70                                                | 0.44                                                 | 3.95                                                 | 2.15                                                 | 0.69                                                 |
| <b>OCE</b> |                   |                             |                          |                           |                                   |                                   |                                                      |                                                      |                                                      |                                                      |                                                      |
| ANY        | 27859             | 25320                       |                          | 333                       | 15.82                             | 0.96                              | 20.66                                                | 0.27                                                 | 7.50                                                 | 1.85                                                 | 0.93                                                 |
| LGA        | 11407             | 10891                       |                          | 359                       | 15.34                             | 1.05                              | 19.31                                                | 0.14                                                 | 8.42                                                 | 1.74                                                 | 0.65                                                 |
| LGH        | 2971              | 2622                        |                          | 306                       | 15.04                             | 0.80                              | 21.59                                                | 0.27                                                 | 6.41                                                 | 1.38                                                 | 1.04                                                 |
| LGT        | 193               | 155                         |                          | 510                       | 19.12                             | 1.46                              | 26.52                                                | 0.32                                                 | 10.33                                                | 4.11                                                 | 1.43                                                 |
| MRA        | 2997              | 2847                        |                          | 401                       | 14.53                             | 1.03                              | 19.95                                                | 0.18                                                 | 7.31                                                 | 2.98                                                 | 1.10                                                 |
| MRH        | 2787              | 2385                        |                          | 339                       | 16.60                             | 0.98                              | 22.48                                                | 0.54                                                 | 7.84                                                 | 1.74                                                 | 1.26                                                 |
| MRT        | 128               | 119                         |                          | 571                       | 15.19                             | 1.17                              | 23.63                                                | 0.67                                                 | 7.14                                                 | 4.82                                                 | 1.28                                                 |
| Other      | 5277              | 4749                        |                          | 264                       | 16.34                             | 0.76                              | 20.90                                                | 0.42                                                 | 5.91                                                 | 1.56                                                 | 1.10                                                 |
| URBAN      | 2100              | 1553                        |                          | 267                       | 19.77                             | 0.94                              | 25.40                                                | 0.51                                                 | 7.33                                                 | 1.90                                                 | 1.31                                                 |
| <b>SAS</b> |                   |                             |                          |                           |                                   |                                   |                                                      |                                                      |                                                      |                                                      |                                                      |
| ANY        | 140642            | 118678                      |                          | 54                        | 12.13                             | 0.51                              | 12.58                                                | 0.21                                                 | 3.22                                                 | 1.58                                                 | 0.61                                                 |
| LGA        | 3167              | 2310                        |                          | 4                         | 17.02                             | 0.55                              | 18.44                                                | 0.05                                                 | 4.45                                                 | 0.98                                                 | 0.52                                                 |
| LGH        | 73                | 62                          |                          | 31                        | 10.19                             | 0.36                              | 11.44                                                | 0.10                                                 | 2.89                                                 | 0.65                                                 | 0.33                                                 |
| LGT        | 73                | 63                          |                          | 289                       | 11.80                             | 0.63                              | 15.14                                                | 0.11                                                 | 4.43                                                 | 1.80                                                 | 0.47                                                 |
| MRA        | 85284             | 70934                       |                          | 30                        | 11.72                             | 0.48                              | 11.65                                                | 0.11                                                 | 2.95                                                 | 1.93                                                 | 0.37                                                 |
| MRH        | 21969             | 19557                       |                          | 80                        | 13.44                             | 0.62                              | 14.33                                                | 0.49                                                 | 4.35                                                 | 0.76                                                 | 1.24                                                 |
| MRT        | 1949              | 1692                        |                          | 226                       | 14.73                             | 0.86                              | 18.08                                                | 0.62                                                 | 4.46                                                 | 1.90                                                 | 1.54                                                 |
| Other      | 17830             | 15295                       |                          | 101                       | 11.48                             | 0.45                              | 12.81                                                | 0.27                                                 | 2.83                                                 | 1.25                                                 | 0.73                                                 |
| URBAN      | 10298             | 8764                        |                          | 101                       | 11.89                             | 0.47                              | 13.27                                                | 0.28                                                 | 2.93                                                 | 1.29                                                 | 0.75                                                 |
| <b>SEA</b> |                   |                             |                          |                           |                                   |                                   |                                                      |                                                      |                                                      |                                                      |                                                      |
| ANY        | 35338             | 34270                       |                          | 135                       | 10.01                             | 0.65                              | 12.65                                                | 0.45                                                 | 4.45                                                 | 1.12                                                 | 0.91                                                 |
| LGA        | 24                | 23                          |                          | 4                         | 10.62                             | 0.35                              | 11.50                                                | 0.03                                                 | 2.77                                                 | 0.61                                                 | 0.32                                                 |
| LGH        | 1839              | 1753                        |                          | 267                       | 12.52                             | 0.58                              | 16.09                                                | 0.16                                                 | 4.67                                                 | 1.05                                                 | 0.49                                                 |
| LGT        | 1371              | 1146                        |                          | 77                        | 14.41                             | 0.56                              | 14.93                                                | 0.10                                                 | 3.94                                                 | 1.60                                                 | 0.47                                                 |
| MRA        | 1010              | 950                         |                          | 132                       | 10.33                             | 0.64                              | 12.87                                                | 0.14                                                 | 3.93                                                 | 2.57                                                 | 0.42                                                 |
| MRH        | 19763             | 19445                       |                          | 153                       | 8.18                              | 0.76                              | 12.22                                                | 0.61                                                 | 5.34                                                 | 0.93                                                 | 1.06                                                 |
| MRT        | 735               | 680                         |                          | 143                       | 8.73                              | 0.76                              | 12.83                                                | 0.56                                                 | 3.96                                                 | 1.69                                                 | 1.09                                                 |
| Other      | 9645              | 9338                        |                          | 85                        | 12.59                             | 0.46                              | 12.62                                                | 0.28                                                 | 2.89                                                 | 1.27                                                 | 0.77                                                 |
| URBAN      | 951               | 935                         |                          | 85                        | 12.38                             | 0.46                              | 12.42                                                | 0.27                                                 | 2.84                                                 | 1.25                                                 | 0.76                                                 |
| <b>SSA</b> |                   |                             |                          |                           |                                   |                                   |                                                      |                                                      |                                                      |                                                      |                                                      |
| ANY        | 93499             | 82537                       |                          | 105                       | 14.49                             | 0.54                              | 15.39                                                | 0.21                                                 | 3.56                                                 | 1.54                                                 | 0.63                                                 |
| LGA        | 25741             | 22675                       |                          | 15                        | 16.02                             | 0.53                              | 16.54                                                | 0.06                                                 | 4.28                                                 | 0.91                                                 | 0.49                                                 |
| LGH        | 3929              | 3518                        |                          | 109                       | 16.56                             | 0.64                              | 18.46                                                | 0.36                                                 | 4.51                                                 | 1.84                                                 | 0.54                                                 |
| LGT        | 1843              | 1654                        |                          | 398                       | 11.62                             | 0.79                              | 14.84                                                | 0.19                                                 | 5.61                                                 | 2.22                                                 | 0.47                                                 |
| MRA        | 33112             | 29586                       |                          | 28                        | 16.75                             | 0.57                              | 16.55                                                | 0.13                                                 | 3.51                                                 | 2.30                                                 | 0.51                                                 |
| MRH        | 8845              | 7563                        |                          | 200                       | 12.11                             | 0.51                              | 14.37                                                | 0.72                                                 | 3.11                                                 | 0.84                                                 | 1.18                                                 |
| MRT        | 12896             | 11254                       |                          | 304                       | 7.45                              | 0.40                              | 9.69                                                 | 0.29                                                 | 2.06                                                 | 0.87                                                 | 0.79                                                 |
| Other      | 5936              | 5208                        |                          | 212                       | 13.00                             | 0.55                              | 15.29                                                | 0.28                                                 | 3.25                                                 | 1.84                                                 | 0.76                                                 |
| URBAN      | 1196              | 1079                        |                          | 359                       | 13.16                             | 0.66                              | 16.25                                                | 0.34                                                 | 3.91                                                 | 2.21                                                 | 0.83                                                 |



|            | Number<br>(total) | Number<br>(no<br>followers) | Average<br>milk<br>yield | Weight<br>gain per<br>day | Manure                            | N<br>Excretion                    | Enteric<br>fermen-<br>tation<br>CH <sub>4</sub>      | Manure<br>mgmt<br>CH <sub>4</sub>                    | Manure<br>mgmt<br>N <sub>2</sub> O                   | Manure<br>cropland<br>N <sub>2</sub> O               | Manure<br>grassland<br>N <sub>2</sub> O              |
|------------|-------------------|-----------------------------|--------------------------|---------------------------|-----------------------------------|-----------------------------------|------------------------------------------------------|------------------------------------------------------|------------------------------------------------------|------------------------------------------------------|------------------------------------------------------|
|            | (1000)            | (1000)                      | (kg/d)                   | (g/d)                     | (kg/<br>kgBW <sup>0.75</sup> /yr) | (kg/<br>kgBW <sup>0.75</sup> /yr) | (kgCO <sub>2</sub> -eq/<br>kgBW <sup>0.75</sup> /yr) |
| <b>WRD</b> |                   |                             |                          |                           |                                   |                                   |                                                      |                                                      |                                                      |                                                      |                                                      |
| ANY        | 667773            | 597741                      |                          | 273                       | 12.22                             | 0.57                              | 14.26                                                | 0.30                                                 | 3.81                                                 | 1.46                                                 | 0.70                                                 |
| LGA        | 64136             | 57947                       |                          | 145                       | 15.19                             | 0.60                              | 16.58                                                | 0.07                                                 | 4.85                                                 | 1.02                                                 | 0.52                                                 |
| LGH        | 32731             | 30458                       |                          | 259                       | 12.00                             | 0.55                              | 14.99                                                | 0.21                                                 | 4.31                                                 | 1.02                                                 | 0.49                                                 |
| LGT        | 22279             | 20304                       |                          | 305                       | 10.56                             | 0.54                              | 13.97                                                | 0.17                                                 | 3.42                                                 | 1.53                                                 | 0.67                                                 |
| MRA        | 147635            | 124849                      |                          | 120                       | 13.32                             | 0.54                              | 13.77                                                | 0.12                                                 | 3.38                                                 | 2.10                                                 | 0.46                                                 |
| MRH        | 145589            | 134695                      |                          | 228                       | 11.16                             | 0.55                              | 13.09                                                | 0.40                                                 | 4.10                                                 | 0.84                                                 | 0.75                                                 |
| MRT        | 93753             | 83702                       |                          | 715                       | 10.29                             | 0.71                              | 15.53                                                | 0.60                                                 | 3.87                                                 | 1.87                                                 | 1.24                                                 |
| Other      | 126110            | 114548                      |                          | 233                       | 12.12                             | 0.51                              | 13.89                                                | 0.33                                                 | 3.41                                                 | 1.37                                                 | 0.69                                                 |
| URBAN      | 35595             | 31238                       |                          | 290                       | 12.47                             | 0.56                              | 15.14                                                | 0.35                                                 | 3.70                                                 | 1.54                                                 | 0.76                                                 |

|             | Number<br>(productive) | Number<br>(herd) | Average<br>milk<br>yield | Weight<br>gain per<br>day | Manure                            | N<br>Excretion                    | Enteric<br>fermen-<br>tation<br>CH <sub>4</sub>      | Manure<br>mgmt<br>CH <sub>4</sub>                    | Manure<br>mgmt<br>N <sub>2</sub> O                   | Manure<br>cropland<br>N <sub>2</sub> O               | Manure<br>grassland<br>N <sub>2</sub> O              |
|-------------|------------------------|------------------|--------------------------|---------------------------|-----------------------------------|-----------------------------------|------------------------------------------------------|------------------------------------------------------|------------------------------------------------------|------------------------------------------------------|------------------------------------------------------|
|             | (1000)                 | (1000)           | (kg/d)                   | (g/d)                     | (kg/<br>kgBW <sup>0.75</sup> /yr) | (kg/<br>kgBW <sup>0.75</sup> /yr) | (kgCO <sub>2</sub> -eq/<br>kgBW <sup>0.75</sup> /yr) |
| <b>SGTD</b> |                        |                  |                          |                           |                                   |                                   |                                                      |                                                      |                                                      |                                                      |                                                      |
| <b>CIS</b>  |                        |                  |                          |                           |                                   |                                   |                                                      |                                                      |                                                      |                                                      |                                                      |
| ANY         | 481                    | 820              | 0.7                      |                           | 16.24                             | 0.50                              | 14.36                                                | 0.14                                                 | 1.81                                                 | 0.59                                                 | 0.49                                                 |
| LGA         | 10                     | 18               | 0.7                      |                           | 16.93                             | 0.50                              | 14.61                                                | 0.03                                                 | 2.24                                                 | 0.27                                                 | 0.51                                                 |
| LGT         | 116                    | 210              | 0.7                      |                           | 16.93                             | 0.50                              | 14.61                                                | 0.06                                                 | 2.11                                                 | 0.53                                                 | 0.51                                                 |
| MRA         | 34                     | 61               | 0.7                      |                           | 16.06                             | 0.48                              | 14.29                                                | 0.03                                                 | 2.19                                                 | 0.26                                                 | 0.49                                                 |
| MRH         | 1                      | 1                | 0.7                      |                           | 16.06                             | 0.48                              | 14.29                                                | 0.15                                                 | 2.18                                                 | 0.26                                                 | 0.49                                                 |
| MRT         | 254                    | 458              | 0.7                      |                           | 15.97                             | 0.51                              | 14.26                                                | 0.23                                                 | 2.06                                                 | 0.83                                                 | 0.49                                                 |
| Other       | 48                     | 86               | 0.7                      |                           | 16.06                             | 0.50                              | 14.29                                                |                                                      |                                                      |                                                      | 0.49                                                 |
| URBAN       | 19                     | 34               | 0.7                      |                           | 16.06                             | 0.50                              | 14.29                                                |                                                      |                                                      |                                                      | 0.49                                                 |
| <b>EAS</b>  |                        |                  |                          |                           |                                   |                                   |                                                      |                                                      |                                                      |                                                      |                                                      |
| ANY         | 3856                   | 6947             | 0.2                      |                           | 8.71                              | 0.21                              | 6.67                                                 | 0.06                                                 | 0.65                                                 | 0.26                                                 | 0.18                                                 |
| LGA         | 190                    | 343              | 0.2                      |                           | 8.30                              | 0.21                              | 6.48                                                 | 0.01                                                 | 0.93                                                 | 0.12                                                 | 0.18                                                 |
| LGH         | 0                      | 0                | 0.2                      |                           | 8.30                              | 0.21                              | 6.48                                                 | 0.02                                                 | 0.92                                                 | 0.12                                                 | 0.18                                                 |
| LGT         | 809                    | 1456             | 0.2                      |                           | 8.30                              | 0.20                              | 6.48                                                 | 0.03                                                 | 0.76                                                 | 0.46                                                 | 0.18                                                 |
| MRA         | 77                     | 139              | 0.2                      |                           | 9.05                              | 0.23                              | 6.78                                                 | 0.02                                                 | 0.93                                                 | 0.39                                                 | 0.19                                                 |
| MRH         | 136                    | 245              | 0.2                      |                           | 8.75                              | 0.22                              | 6.71                                                 | 0.12                                                 | 0.88                                                 | 0.39                                                 | 0.19                                                 |
| MRT         | 2013                   | 3626             | 0.2                      |                           | 8.84                              | 0.21                              | 6.73                                                 | 0.10                                                 | 0.76                                                 | 0.26                                                 | 0.19                                                 |
| Other       | 407                    | 735              | 0.2                      |                           | 8.95                              | 0.22                              | 6.75                                                 |                                                      |                                                      |                                                      | 0.19                                                 |
| URBAN       | 223                    | 402              | 0.2                      |                           | 8.83                              | 0.22                              | 6.73                                                 |                                                      |                                                      |                                                      | 0.19                                                 |
| <b>EUR</b>  |                        |                  |                          |                           |                                   |                                   |                                                      |                                                      |                                                      |                                                      |                                                      |
| ANY         | 413                    | 635              | 0.4                      |                           | 11.98                             | 0.28                              | 7.98                                                 | 0.05                                                 | 0.81                                                 | 0.20                                                 | 0.36                                                 |
| LGA         | 15                     | 27               | 0.2                      |                           | 12.58                             | 0.27                              | 7.47                                                 | 0.01                                                 | 1.20                                                 | 0.14                                                 | 0.38                                                 |
| LGH         | 16                     | 29               | 0.3                      |                           | 12.57                             | 0.26                              | 7.52                                                 | 0.12                                                 | 1.04                                                 | 0.42                                                 | 0.38                                                 |
| LGT         | 20                     | 39               | 0.5                      |                           | 12.40                             | 0.36                              | 9.03                                                 | 0.04                                                 | 1.54                                                 | 0.38                                                 | 0.37                                                 |
| MRA         | 62                     | 111              | 0.4                      |                           | 11.65                             | 0.26                              | 7.82                                                 | 0.01                                                 | 1.17                                                 | 0.14                                                 | 0.35                                                 |
| MRH         | 77                     | 139              | 0.4                      |                           | 11.65                             | 0.24                              | 7.82                                                 | 0.08                                                 | 1.08                                                 | 0.13                                                 | 0.35                                                 |
| MRT         | 104                    | 188              | 0.4                      |                           | 11.65                             | 0.27                              | 7.87                                                 | 0.12                                                 | 1.09                                                 | 0.44                                                 | 0.35                                                 |
| Other       | 92                     | 168              | 0.4                      |                           | 12.41                             | 0.30                              | 8.20                                                 |                                                      |                                                      |                                                      | 0.37                                                 |
| URBAN       | 27                     | 49               | 0.4                      |                           | 12.45                             | 0.30                              | 8.28                                                 |                                                      |                                                      |                                                      | 0.37                                                 |
| <b>LAM</b>  |                        |                  |                          |                           |                                   |                                   |                                                      |                                                      |                                                      |                                                      |                                                      |
| ANY         | 858                    | 2044             | 0.4                      |                           | 8.48                              | 0.23                              | 6.67                                                 | 0.02                                                 | 0.73                                                 | 0.18                                                 | 0.27                                                 |
| LGA         | 178                    | 436              | 0.1                      |                           | 8.71                              | 0.19                              | 6.31                                                 | 0.01                                                 | 0.86                                                 | 0.11                                                 | 0.28                                                 |
| LGH         | 74                     | 181              | 0.2                      |                           | 8.78                              | 0.17                              | 6.67                                                 | 0.02                                                 | 0.75                                                 | 0.09                                                 | 0.28                                                 |
| LGT         | 33                     | 80               | 0.5                      |                           | 7.09                              | 0.33                              | 6.73                                                 | 0.02                                                 | 1.49                                                 | 0.19                                                 | 0.23                                                 |
| MRA         | 143                    | 351              | 0.2                      |                           | 8.80                              | 0.21                              | 6.99                                                 | 0.02                                                 | 0.86                                                 | 0.37                                                 | 0.28                                                 |
| MRH         | 200                    | 491              | 0.5                      |                           | 8.16                              | 0.15                              | 5.98                                                 | 0.03                                                 | 0.66                                                 | 0.09                                                 | 0.26                                                 |
| MRT         | 26                     | 63               | 1.2                      |                           | 10.37                             | 1.09                              | 9.11                                                 | 0.30                                                 | 4.41                                                 | 1.96                                                 | 0.34                                                 |
| Other       | 174                    | 426              | 0.4                      |                           | 8.31                              | 0.25                              | 7.16                                                 |                                                      |                                                      |                                                      | 0.27                                                 |
| URBAN       | 31                     | 75               | 0.6                      |                           | 7.82                              | 0.25                              | 6.86                                                 |                                                      |                                                      |                                                      | 0.25                                                 |
| <b>MNA</b>  |                        |                  |                          |                           |                                   |                                   |                                                      |                                                      |                                                      |                                                      |                                                      |
| ANY         | 8999                   | 15018            | 0.3                      |                           | 10.87                             | 0.34                              | 8.54                                                 | 0.04                                                 | 1.26                                                 | 0.31                                                 | 0.32                                                 |
| LGA         | 3793                   | 6754             | 0.2                      |                           | 11.29                             | 0.29                              | 8.52                                                 | 0.01                                                 | 1.32                                                 | 0.17                                                 | 0.35                                                 |
| LGH         | 0                      | 1                | 0.4                      |                           | 9.98                              | 0.34                              | 10.33                                                | 0.04                                                 | 1.52                                                 | 0.19                                                 | 0.32                                                 |
| LGT         | 61                     | 92               | 0.4                      |                           | 9.37                              | 0.48                              | 9.07                                                 | 0.05                                                 | 2.08                                                 | 0.44                                                 | 0.23                                                 |
| MRA         | 3960                   | 6649             | 0.3                      |                           | 10.54                             | 0.26                              | 8.28                                                 | 0.02                                                 | 1.14                                                 | 0.26                                                 | 0.30                                                 |
| MRH         | 36                     | 60               | 0.7                      |                           | 10.56                             | 1.41                              | 10.73                                                | 0.85                                                 | 5.74                                                 | 2.32                                                 | 0.30                                                 |
| MRT         | 415                    | 629              | 0.7                      |                           | 9.97                              | 0.96                              | 9.71                                                 | 0.44                                                 | 3.57                                                 | 2.40                                                 | 0.25                                                 |
| Other       | 270                    | 428              | 0.4                      |                           | 10.83                             | 1.05                              | 9.58                                                 |                                                      |                                                      |                                                      | 0.28                                                 |
| URBAN       | 463                    | 800              | 0.3                      |                           | 11.21                             | 0.32                              | 9.11                                                 |                                                      |                                                      |                                                      | 0.34                                                 |

|            | Number<br>(productive) | Number<br>(herd) | Average<br>milk<br>yield | Weight<br>gain per<br>day | Manure                            | N<br>Excretion                    | Enteric<br>fermen-<br>tation<br>CH <sub>4</sub>      | Manure<br>mgmt<br>CH <sub>4</sub>                    | Manure<br>mgmt<br>N <sub>2</sub> O                   | Manure<br>cropland<br>N <sub>2</sub> O               | Manure<br>grassland<br>N <sub>2</sub> O              |
|------------|------------------------|------------------|--------------------------|---------------------------|-----------------------------------|-----------------------------------|------------------------------------------------------|------------------------------------------------------|------------------------------------------------------|------------------------------------------------------|------------------------------------------------------|
|            | (1000)                 | (1000)           | (kg/d)                   | (g/d)                     | (kg/<br>kgBW <sup>0.75</sup> /yr) | (kg/<br>kgBW <sup>0.75</sup> /yr) | (kgCO <sub>2</sub> -eq/<br>kgBW <sup>0.75</sup> /yr) |
| <b>OCE</b> |                        |                  |                          |                           |                                   |                                   |                                                      |                                                      |                                                      |                                                      |                                                      |
| ANY        | 0                      | 0                |                          |                           |                                   |                                   |                                                      |                                                      |                                                      |                                                      |                                                      |
| <b>SAS</b> |                        |                  |                          |                           |                                   |                                   |                                                      |                                                      |                                                      |                                                      |                                                      |
| ANY        | 5388                   | 9698             | 0.5                      |                           | 9.94                              | 0.45                              | 7.64                                                 | 0.10                                                 | 1.65                                                 | 0.69                                                 | 0.32                                                 |
| LGA        | 383                    | 690              | 0.3                      |                           | 9.70                              | 0.30                              | 7.43                                                 | 0.01                                                 | 1.35                                                 | 0.18                                                 | 0.31                                                 |
| LGH        | 2                      | 3                | 0.5                      |                           | 9.58                              | 0.43                              | 7.98                                                 | 0.04                                                 | 1.94                                                 | 0.26                                                 | 0.31                                                 |
| LGT        | 3                      | 5                | 0.7                      |                           | 8.83                              | 0.51                              | 8.81                                                 | 0.08                                                 | 1.92                                                 | 1.16                                                 | 0.28                                                 |
| MRA        | 2253                   | 4055             | 0.6                      |                           | 10.46                             | 0.59                              | 6.20                                                 | 0.06                                                 | 2.39                                                 | 1.02                                                 | 0.33                                                 |
| MRH        | 1853                   | 3335             | 0.5                      |                           | 9.69                              | 0.39                              | 9.22                                                 | 0.22                                                 | 1.58                                                 | 0.70                                                 | 0.31                                                 |
| MRT        | 63                     | 114              | 0.8                      |                           | 9.39                              | 0.34                              | 8.11                                                 | 0.15                                                 | 1.21                                                 | 0.42                                                 | 0.30                                                 |
| Other      | 472                    | 849              | 0.4                      |                           | 8.93                              | 0.29                              | 7.99                                                 |                                                      |                                                      |                                                      | 0.28                                                 |
| URBAN      | 359                    | 645              | 0.4                      |                           | 9.60                              | 0.30                              | 8.25                                                 |                                                      |                                                      |                                                      | 0.31                                                 |
| <b>SEA</b> |                        |                  |                          |                           |                                   |                                   |                                                      |                                                      |                                                      |                                                      |                                                      |
| ANY        | 1182                   | 2128             | 0.3                      |                           | 6.75                              | 0.18                              | 5.41                                                 | 0.07                                                 | 0.53                                                 | 0.24                                                 | 0.21                                                 |
| LGA        | 0                      | 0                | 0.2                      |                           | 8.81                              | 0.22                              | 6.65                                                 | 0.01                                                 | 1.01                                                 | 0.13                                                 | 0.28                                                 |
| LGH        | 10                     | 19               | 0.2                      |                           | 8.81                              | 0.22                              | 6.65                                                 | 0.02                                                 | 1.01                                                 | 0.13                                                 | 0.28                                                 |
| LGT        | 296                    | 533              | 0.4                      |                           | 2.00                              | 0.07                              | 1.94                                                 | 0.01                                                 | 0.27                                                 | 0.16                                                 | 0.06                                                 |
| MRA        | 6                      | 10               | 0.3                      |                           | 8.65                              | 0.22                              | 6.79                                                 | 0.02                                                 | 0.90                                                 | 0.39                                                 | 0.28                                                 |
| MRH        | 546                    | 983              | 0.3                      |                           | 8.65                              | 0.22                              | 6.79                                                 | 0.13                                                 | 0.90                                                 | 0.40                                                 | 0.28                                                 |
| MRT        | 58                     | 105              | 0.6                      |                           | 4.82                              | 0.22                              | 4.27                                                 | 0.10                                                 | 0.79                                                 | 0.27                                                 | 0.15                                                 |
| Other      | 201                    | 362              | 0.3                      |                           | 8.38                              | 0.21                              | 6.59                                                 |                                                      |                                                      |                                                      | 0.27                                                 |
| URBAN      | 65                     | 117              | 0.3                      |                           | 8.57                              | 0.22                              | 6.73                                                 |                                                      |                                                      |                                                      | 0.27                                                 |
| <b>SSA</b> |                        |                  |                          |                           |                                   |                                   |                                                      |                                                      |                                                      |                                                      |                                                      |
| ANY        | 8541                   | 15374            | 0.3                      |                           | 11.99                             | 0.39                              | 10.15                                                | 0.03                                                 | 1.61                                                 | 0.32                                                 | 0.38                                                 |
| LGA        | 4339                   | 7810             | 0.3                      |                           | 12.65                             | 0.41                              | 10.52                                                | 0.02                                                 | 1.84                                                 | 0.23                                                 | 0.40                                                 |
| LGH        | 281                    | 505              | 0.4                      |                           | 10.95                             | 0.40                              | 10.84                                                | 0.05                                                 | 1.80                                                 | 0.23                                                 | 0.35                                                 |
| LGT        | 37                     | 66               | 0.6                      |                           | 7.64                              | 0.47                              | 7.62                                                 | 0.02                                                 | 2.13                                                 | 0.26                                                 | 0.25                                                 |
| MRA        | 3179                   | 5721             | 0.3                      |                           | 11.82                             | 0.33                              | 9.78                                                 | 0.02                                                 | 1.43                                                 | 0.38                                                 | 0.38                                                 |
| MRH        | 149                    | 267              | 0.7                      |                           | 8.60                              | 0.44                              | 8.75                                                 | 0.28                                                 | 1.77                                                 | 0.78                                                 | 0.28                                                 |
| MRT        | 205                    | 369              | 0.9                      |                           | 7.26                              | 0.56                              | 8.34                                                 | 0.27                                                 | 2.00                                                 | 1.66                                                 | 0.24                                                 |
| Other      | 320                    | 576              | 0.6                      |                           | 10.90                             | 0.49                              | 10.23                                                |                                                      |                                                      |                                                      | 0.35                                                 |
| URBAN      | 33                     | 60               | 0.6                      |                           | 11.31                             | 0.49                              | 11.17                                                |                                                      |                                                      |                                                      | 0.36                                                 |
| <b>WRD</b> |                        |                  |                          |                           |                                   |                                   |                                                      |                                                      |                                                      |                                                      |                                                      |
| ANY        | 29719                  | 52664            | 0.4                      |                           | 10.61                             | 0.35                              | 8.51                                                 | 0.05                                                 | 1.31                                                 | 0.37                                                 | 0.32                                                 |
| LGA        | 8909                   | 16077            | 0.3                      |                           | 11.78                             | 0.34                              | 9.36                                                 | 0.01                                                 | 1.55                                                 | 0.20                                                 | 0.37                                                 |
| LGH        | 383                    | 738              | 0.4                      |                           | 10.53                             | 0.34                              | 9.77                                                 | 0.04                                                 | 1.54                                                 | 0.21                                                 | 0.34                                                 |
| LGT        | 1375                   | 2481             | 0.3                      |                           | 7.74                              | 0.22                              | 6.38                                                 | 0.03                                                 | 0.90                                                 | 0.39                                                 | 0.19                                                 |
| MRA        | 9714                   | 17098            | 0.4                      |                           | 10.93                             | 0.36                              | 8.28                                                 | 0.03                                                 | 1.52                                                 | 0.48                                                 | 0.33                                                 |
| MRH        | 2998                   | 5521             | 0.5                      |                           | 9.36                              | 0.35                              | 8.40                                                 | 0.19                                                 | 1.41                                                 | 0.60                                                 | 0.29                                                 |
| MRT        | 3139                   | 5552             | 0.4                      |                           | 9.50                              | 0.37                              | 7.88                                                 | 0.17                                                 | 1.37                                                 | 0.70                                                 | 0.23                                                 |
| Other      | 1984                   | 3631             | 0.4                      |                           | 9.73                              | 0.41                              | 8.26                                                 |                                                      |                                                      |                                                      | 0.28                                                 |
| URBAN      | 1219                   | 2182             | 0.3                      |                           | 10.18                             | 0.29                              | 8.36                                                 |                                                      |                                                      |                                                      | 0.30                                                 |

|             | Number<br>(total) | Number<br>(no<br>followers) | Average<br>milk<br>yield | Weight<br>gain per<br>day | Manure                            | N<br>Excretion                    | Enteric<br>fermen-<br>tation<br>CH <sub>4</sub>      | Manure<br>mgmt<br>CH <sub>4</sub>                    | Manure<br>mgmt<br>N <sub>2</sub> O                   | Manure<br>cropland<br>N <sub>2</sub> O               | Manure<br>grassland<br>N <sub>2</sub> O              |
|-------------|-------------------|-----------------------------|--------------------------|---------------------------|-----------------------------------|-----------------------------------|------------------------------------------------------|------------------------------------------------------|------------------------------------------------------|------------------------------------------------------|------------------------------------------------------|
|             | (1000)            | (1000)                      | (kg/d)                   | (g/d)                     | (kg/<br>kgBW <sup>0.75</sup> /yr) | (kg/<br>kgBW <sup>0.75</sup> /yr) | (kgCO <sub>2</sub> -eq/<br>kgBW <sup>0.75</sup> /yr) |
| <b>SGTO</b> |                   |                             |                          |                           |                                   |                                   |                                                      |                                                      |                                                      |                                                      |                                                      |
| <b>CIS</b>  |                   |                             |                          |                           |                                   |                                   |                                                      |                                                      |                                                      |                                                      |                                                      |
| ANY         | 5287              | 4948                        |                          | 95                        | 11.16                             | 0.62                              | 12.72                                                | 0.13                                                 | 2.30                                                 | 0.63                                                 | 0.52                                                 |
| LGA         | 448               | 440                         |                          | 73                        | 13.09                             | 0.56                              | 12.14                                                | 0.03                                                 | 2.52                                                 | 0.30                                                 | 0.52                                                 |
| LGT         | 1963              | 1870                        |                          | 77                        | 10.11                             | 0.55                              | 11.96                                                | 0.06                                                 | 2.34                                                 | 0.58                                                 | 0.46                                                 |
| MRA         | 587               | 560                         |                          | 109                       | 12.15                             | 0.65                              | 13.02                                                | 0.03                                                 | 2.93                                                 | 0.35                                                 | 0.56                                                 |
| MRH         | 1                 | 1                           |                          | 112                       | 14.42                             | 1.16                              | 16.29                                                | 0.36                                                 | 5.22                                                 | 0.61                                                 | 0.71                                                 |
| MRT         | 1695              | 1491                        |                          | 123                       | 10.24                             | 0.71                              | 13.53                                                | 0.31                                                 | 2.87                                                 | 1.16                                                 | 0.56                                                 |
| Other       | 434               | 396                         |                          | 76                        | 14.51                             | 0.61                              | 13.34                                                |                                                      |                                                      |                                                      | 0.57                                                 |
| URBAN       | 206               | 191                         |                          | 76                        | 14.28                             | 0.60                              | 13.12                                                |                                                      |                                                      |                                                      | 0.56                                                 |
| <b>EAS</b>  |                   |                             |                          |                           |                                   |                                   |                                                      |                                                      |                                                      |                                                      |                                                      |
| ANY         | 23806             | 20715                       |                          | 85                        | 9.99                              | 0.60                              | 11.67                                                | 0.18                                                 | 1.89                                                 | 0.76                                                 | 0.33                                                 |
| LGA         | 1176              | 1024                        |                          | 77                        | 9.83                              | 0.58                              | 11.63                                                | 0.02                                                 | 2.63                                                 | 0.34                                                 | 0.31                                                 |
| LGH         | 1                 | 1                           |                          | 77                        | 9.83                              | 0.58                              | 11.63                                                | 0.06                                                 | 2.62                                                 | 0.35                                                 | 0.31                                                 |
| LGT         | 4995              | 4348                        |                          | 89                        | 9.97                              | 0.62                              | 11.75                                                | 0.10                                                 | 2.34                                                 | 1.42                                                 | 0.33                                                 |
| MRA         | 478               | 416                         |                          | 65                        | 10.65                             | 0.52                              | 11.09                                                | 0.05                                                 | 2.10                                                 | 0.89                                                 | 0.32                                                 |
| MRH         | 841               | 732                         |                          | 67                        | 10.28                             | 0.51                              | 10.58                                                | 0.29                                                 | 2.07                                                 | 0.92                                                 | 0.31                                                 |
| MRT         | 12427             | 10814                       |                          | 89                        | 9.97                              | 0.62                              | 11.75                                                | 0.28                                                 | 2.20                                                 | 0.76                                                 | 0.33                                                 |
| Other       | 2513              | 2185                        |                          | 76                        | 9.99                              | 0.58                              | 11.60                                                |                                                      |                                                      |                                                      | 0.32                                                 |
| URBAN       | 1376              | 1197                        |                          | 76                        | 9.99                              | 0.58                              | 11.60                                                |                                                      |                                                      |                                                      | 0.32                                                 |
| <b>EUR</b>  |                   |                             |                          |                           |                                   |                                   |                                                      |                                                      |                                                      |                                                      |                                                      |
| ANY         | 610               | 388                         |                          | 119                       | 13.14                             | 0.94                              | 16.34                                                | 0.15                                                 | 2.43                                                 | 0.65                                                 | 0.66                                                 |
| LGA         | 12                | 0                           |                          | 72                        | 294.23                            | 12.93                             | 272.72                                               | 0.67                                                 | 58.40                                                | 6.91                                                 | 11.59                                                |
| LGH         | 14                | 1                           |                          | 74                        | 87.11                             | 6.45                              | 89.01                                                | 2.98                                                 | 25.99                                                | 10.54                                                | 3.65                                                 |
| LGT         | 126               | 108                         |                          | 113                       | 8.17                              | 0.72                              | 11.43                                                | 0.09                                                 | 3.08                                                 | 0.77                                                 | 0.42                                                 |
| MRA         | 54                | 5                           |                          | 109                       | 89.58                             | 4.93                              | 95.99                                                | 0.25                                                 | 22.26                                                | 2.63                                                 | 4.09                                                 |
| MRH         | 62                | 0                           |                          | 112                       | 978.48                            | 79.02                             | 1105.34                                              | 24.76                                                | 355.77                                               | 41.86                                                | 48.20                                                |
| MRT         | 172               | 88                          |                          | 131                       | 11.64                             | 0.88                              | 15.80                                                | 0.39                                                 | 3.54                                                 | 1.43                                                 | 0.65                                                 |
| Other       | 229               | 153                         |                          | 118                       | 11.43                             | 0.74                              | 13.80                                                |                                                      |                                                      |                                                      | 0.56                                                 |
| URBAN       | 56                | 33                          |                          | 132                       | 12.88                             | 0.88                              | 15.58                                                |                                                      |                                                      |                                                      | 0.65                                                 |
| <b>LAM</b>  |                   |                             |                          |                           |                                   |                                   |                                                      |                                                      |                                                      |                                                      |                                                      |
| ANY         | 6843              | 5657                        |                          | 63                        | 16.80                             | 0.90                              | 15.89                                                | 0.08                                                 | 2.76                                                 | 0.60                                                 | 0.73                                                 |
| LGA         | 1104              | 846                         |                          | 39                        | 22.37                             | 0.90                              | 17.23                                                | 0.04                                                 | 4.08                                                 | 0.50                                                 | 0.87                                                 |
| LGH         | 379               | 272                         |                          | 59                        | 21.10                             | 1.36                              | 19.58                                                | 0.16                                                 | 6.11                                                 | 0.78                                                 | 0.90                                                 |
| LGT         | 627               | 579                         |                          | 54                        | 11.51                             | 0.58                              | 10.96                                                | 0.03                                                 | 2.63                                                 | 0.33                                                 | 0.48                                                 |
| MRA         | 827               | 620                         |                          | 42                        | 23.91                             | 1.02                              | 18.71                                                | 0.11                                                 | 4.10                                                 | 1.76                                                 | 0.94                                                 |
| MRH         | 1143              | 853                         |                          | 66                        | 18.59                             | 1.16                              | 19.40                                                | 0.21                                                 | 5.22                                                 | 0.69                                                 | 0.84                                                 |
| MRT         | 578               | 541                         |                          | 101                       | 11.18                             | 0.90                              | 12.93                                                | 0.25                                                 | 3.65                                                 | 1.62                                                 | 0.58                                                 |
| Other       | 2005              | 1753                        |                          | 75                        | 13.47                             | 0.75                              | 14.25                                                |                                                      |                                                      |                                                      | 0.62                                                 |
| URBAN       | 238               | 194                         |                          | 72                        | 17.54                             | 0.96                              | 18.22                                                |                                                      |                                                      |                                                      | 0.80                                                 |
| <b>MNA</b>  |                   |                             |                          |                           |                                   |                                   |                                                      |                                                      |                                                      |                                                      |                                                      |
| ANY         | 14396             | 8377                        |                          | 78                        | 21.70                             | 1.11                              | 22.68                                                | 0.08                                                 | 4.48                                                 | 0.92                                                 | 0.95                                                 |
| LGA         | 6393              | 3433                        |                          | 55                        | 24.15                             | 1.13                              | 25.01                                                | 0.05                                                 | 5.10                                                 | 0.64                                                 | 1.00                                                 |
| LGH         | 0                 |                             |                          | 54                        |                                   |                                   |                                                      |                                                      |                                                      |                                                      |                                                      |
| LGT         | 69                | 38                          |                          | 67                        | 17.88                             | 1.13                              | 18.43                                                | 0.09                                                 | 4.96                                                 | 0.89                                                 | 0.67                                                 |
| MRA         | 6497              | 3808                        |                          | 99                        | 20.41                             | 1.12                              | 22.01                                                | 0.08                                                 | 4.81                                                 | 1.18                                                 | 0.94                                                 |
| MRH         | 60                | 37                          |                          | 97                        | 18.52                             | 1.03                              | 19.15                                                | 0.60                                                 | 4.24                                                 | 1.60                                                 | 0.86                                                 |
| MRT         | 542               | 328                         |                          | 102                       | 16.33                             | 1.11                              | 17.20                                                | 0.51                                                 | 4.16                                                 | 2.69                                                 | 0.71                                                 |
| Other       | 450               | 292                         |                          | 82                        | 17.26                             | 0.86                              | 16.30                                                |                                                      |                                                      |                                                      | 0.75                                                 |
| URBAN       | 779               | 442                         |                          | 81                        | 21.31                             | 1.01                              | 19.21                                                |                                                      |                                                      |                                                      | 0.96                                                 |

|            | Number<br>(total) | Number<br>(no<br>followers) | Average<br>milk<br>yield | Weight<br>gain per<br>day | Manure                            | N<br>Excretion                    | Enteric<br>fermen-<br>tation<br>CH <sub>4</sub>      | Manure<br>mgmt<br>CH <sub>4</sub>                    | Manure<br>mgmt<br>N <sub>2</sub> O                   | Manure<br>cropland<br>N <sub>2</sub> O               | Manure<br>grassland<br>N <sub>2</sub> O              |
|------------|-------------------|-----------------------------|--------------------------|---------------------------|-----------------------------------|-----------------------------------|------------------------------------------------------|------------------------------------------------------|------------------------------------------------------|------------------------------------------------------|------------------------------------------------------|
|            | (1000)            | (1000)                      | (kg/d)                   | (g/d)                     | (kg/<br>kgBW <sup>0.75</sup> /yr) | (kg/<br>kgBW <sup>0.75</sup> /yr) | (kgCO <sub>2</sub> -eq/<br>kgBW <sup>0.75</sup> /yr) |
| <b>NAM</b> |                   |                             |                          |                           |                                   |                                   |                                                      |                                                      |                                                      |                                                      |                                                      |
| ANY        | 1380              | 1380                        |                          | 94                        | 18.08                             | 0.85                              | 18.82                                                | 0.06                                                 | 2.59                                                 | 0.44                                                 | 0.79                                                 |
| LGA        | 475               | 475                         |                          | 73                        | 21.27                             | 0.87                              | 19.73                                                | 0.04                                                 | 3.95                                                 | 0.49                                                 | 0.84                                                 |
| LGH        | 14                | 14                          |                          | 79                        | 20.84                             | 0.95                              | 20.18                                                | 0.13                                                 | 4.26                                                 | 0.52                                                 | 0.84                                                 |
| LGT        | 173               | 173                         |                          | 70                        | 12.78                             | 0.53                              | 14.79                                                | 0.05                                                 | 2.27                                                 | 0.59                                                 | 0.61                                                 |
| MRA        | 92                | 92                          |                          | 129                       | 18.20                             | 1.09                              | 21.04                                                | 0.04                                                 | 4.93                                                 | 0.62                                                 | 0.90                                                 |
| MRH        | 9                 | 9                           |                          | 144                       | 13.07                             | 0.88                              | 18.96                                                | 0.21                                                 | 3.96                                                 | 0.50                                                 | 0.79                                                 |
| MRT        | 198               | 198                         |                          | 172                       | 12.32                             | 0.92                              | 19.20                                                | 0.24                                                 | 3.95                                                 | 1.04                                                 | 0.78                                                 |
| Other      | 339               | 339                         |                          | 84                        | 19.53                             | 0.86                              | 18.76                                                |                                                      |                                                      |                                                      | 0.79                                                 |
| URBAN      | 80                | 80                          |                          | 84                        | 19.48                             | 0.86                              | 18.71                                                |                                                      |                                                      |                                                      | 0.79                                                 |
| <b>OCE</b> |                   |                             |                          |                           |                                   |                                   |                                                      |                                                      |                                                      |                                                      |                                                      |
| ANY        | 15970             | 15970                       |                          | 66                        | 16.09                             | 0.92                              | 16.51                                                | 0.08                                                 | 3.54                                                 | 0.83                                                 | 1.02                                                 |
| LGA        | 4335              | 4335                        |                          | 66                        | 16.00                             | 0.98                              | 15.91                                                | 0.04                                                 | 4.41                                                 | 0.54                                                 | 1.02                                                 |
| LGH        | 1318              | 1318                        |                          | 66                        | 16.66                             | 0.79                              | 17.32                                                | 0.09                                                 | 3.56                                                 | 0.45                                                 | 1.04                                                 |
| LGT        | 410               | 410                         |                          | 81                        | 18.18                             | 1.25                              | 17.99                                                | 0.06                                                 | 5.62                                                 | 0.70                                                 | 1.17                                                 |
| MRA        | 5046              | 5046                        |                          | 68                        | 15.47                             | 0.98                              | 16.10                                                | 0.11                                                 | 3.94                                                 | 1.69                                                 | 1.00                                                 |
| MRH        | 2605              | 2605                        |                          | 72                        | 15.97                             | 0.84                              | 17.66                                                | 0.15                                                 | 3.79                                                 | 0.50                                                 | 1.04                                                 |
| MRT        | 125               | 125                         |                          | 89                        | 16.63                             | 1.19                              | 18.64                                                | 0.32                                                 | 4.79                                                 | 2.12                                                 | 1.11                                                 |
| Other      | 1904              | 1904                        |                          | 54                        | 17.12                             | 0.73                              | 16.39                                                |                                                      |                                                      |                                                      | 1.02                                                 |
| URBAN      | 228               | 228                         |                          | 54                        | 17.12                             | 0.73                              | 16.39                                                |                                                      |                                                      |                                                      | 1.02                                                 |
| <b>SAS</b> |                   |                             |                          |                           |                                   |                                   |                                                      |                                                      |                                                      |                                                      |                                                      |
| ANY        | 24363             | 20053                       |                          | 39                        | 20.55                             | 0.81                              | 17.80                                                | 0.13                                                 | 2.75                                                 | 1.06                                                 | 0.82                                                 |
| LGA        | 3035              | 2729                        |                          | 34                        | 20.87                             | 0.62                              | 17.05                                                | 0.02                                                 | 2.80                                                 | 0.36                                                 | 0.81                                                 |
| LGH        | 5                 | 3                           |                          | 54                        | 24.78                             | 1.07                              | 23.72                                                | 0.10                                                 | 4.82                                                 | 0.64                                                 | 1.04                                                 |
| LGT        | 15                | 13                          |                          | 74                        | 20.48                             | 1.37                              | 20.92                                                | 0.22                                                 | 5.18                                                 | 3.13                                                 | 0.91                                                 |
| MRA        | 13511             | 11709                       |                          | 37                        | 18.56                             | 0.76                              | 16.18                                                | 0.08                                                 | 3.09                                                 | 1.31                                                 | 0.74                                                 |
| MRH        | 3361              | 1878                        |                          | 40                        | 30.35                             | 1.29                              | 27.32                                                | 0.73                                                 | 5.21                                                 | 2.32                                                 | 1.24                                                 |
| MRT        | 370               | 319                         |                          | 62                        | 20.44                             | 1.23                              | 20.04                                                | 0.56                                                 | 4.39                                                 | 1.51                                                 | 0.89                                                 |
| Other      | 2588              | 2210                        |                          | 44                        | 21.22                             | 0.82                              | 18.09                                                |                                                      |                                                      |                                                      | 0.86                                                 |
| URBAN      | 1478              | 1191                        |                          | 44                        | 22.65                             | 0.87                              | 19.30                                                |                                                      |                                                      |                                                      | 0.91                                                 |
| <b>SEA</b> |                   |                             |                          |                           |                                   |                                   |                                                      |                                                      |                                                      |                                                      |                                                      |
| ANY        | 4530              | 3584                        |                          | 72                        | 12.40                             | 0.83                              | 14.43                                                | 0.22                                                 | 2.71                                                 | 1.42                                                 | 0.59                                                 |
| LGA        | 0                 | 0                           |                          | 77                        | 11.65                             | 0.72                              | 13.77                                                | 0.02                                                 | 3.24                                                 | 0.42                                                 | 0.56                                                 |
| LGH        | 31                | 23                          |                          | 77                        | 11.24                             | 0.69                              | 13.29                                                | 0.07                                                 | 3.13                                                 | 0.41                                                 | 0.54                                                 |
| LGT        | 1921              | 1684                        |                          | 77                        | 13.82                             | 0.87                              | 16.34                                                | 0.14                                                 | 3.31                                                 | 2.00                                                 | 0.66                                                 |
| MRA        | 16                | 11                          |                          | 63                        | 10.22                             | 0.71                              | 11.14                                                | 0.07                                                 | 2.87                                                 | 1.22                                                 | 0.49                                                 |
| MRH        | 1409              | 972                         |                          | 65                        | 10.27                             | 0.78                              | 11.59                                                | 0.44                                                 | 3.16                                                 | 1.41                                                 | 0.49                                                 |
| MRT        | 347               | 300                         |                          | 54                        | 11.72                             | 0.90                              | 13.01                                                | 0.40                                                 | 3.19                                                 | 1.10                                                 | 0.56                                                 |
| Other      | 679               | 518                         |                          | 80                        | 12.11                             | 0.75                              | 14.30                                                |                                                      |                                                      |                                                      | 0.58                                                 |
| URBAN      | 127               | 75                          |                          | 80                        | 13.40                             | 0.83                              | 15.83                                                |                                                      |                                                      |                                                      | 0.65                                                 |
| <b>SSA</b> |                   |                             |                          |                           |                                   |                                   |                                                      |                                                      |                                                      |                                                      |                                                      |
| ANY        | 33131             | 26298                       |                          | 50                        | 17.26                             | 0.80                              | 15.30                                                | 0.14                                                 | 3.17                                                 | 0.85                                                 | 0.71                                                 |
| LGA        | 10141             | 6670                        |                          | 50                        | 20.47                             | 1.00                              | 18.16                                                | 0.04                                                 | 4.53                                                 | 0.57                                                 | 0.85                                                 |
| LGH        | 1036              | 811                         |                          | 56                        | 18.20                             | 0.92                              | 17.73                                                | 0.11                                                 | 4.16                                                 | 0.53                                                 | 0.77                                                 |
| LGT        | 644               | 614                         |                          | 71                        | 10.79                             | 0.62                              | 11.84                                                | 0.03                                                 | 2.81                                                 | 0.35                                                 | 0.49                                                 |
| MRA        | 11610             | 9067                        |                          | 41                        | 18.66                             | 0.76                              | 15.37                                                | 0.06                                                 | 3.25                                                 | 0.87                                                 | 0.74                                                 |
| MRH        | 4684              | 4565                        |                          | 62                        | 14.05                             | 0.76                              | 13.25                                                | 0.49                                                 | 3.08                                                 | 1.35                                                 | 0.61                                                 |
| MRT        | 2244              | 2080                        |                          | 62                        | 12.35                             | 0.61                              | 12.40                                                | 0.29                                                 | 2.16                                                 | 1.80                                                 | 0.54                                                 |
| Other      | 2142              | 1886                        |                          | 49                        | 15.19                             | 0.63                              | 13.99                                                |                                                      |                                                      |                                                      | 0.62                                                 |
| URBAN      | 630               | 603                         |                          | 50                        | 13.82                             | 0.54                              | 12.42                                                |                                                      |                                                      |                                                      | 0.57                                                 |

|            | Number<br>(total) | Number<br>(no<br>followers) | Average<br>milk<br>yield | Weight<br>gain per<br>day | Manure                            | N<br>Excretion                    | Enteric<br>fermen-<br>tation<br>CH <sub>4</sub>      | Manure<br>mgmt<br>CH <sub>4</sub>                    | Manure<br>mgmt<br>N <sub>2</sub> O                   | Manure<br>cropland<br>N <sub>2</sub> O               | Manure<br>grassland<br>N <sub>2</sub> O              |
|------------|-------------------|-----------------------------|--------------------------|---------------------------|-----------------------------------|-----------------------------------|------------------------------------------------------|------------------------------------------------------|------------------------------------------------------|------------------------------------------------------|------------------------------------------------------|
|            | (1000)            | (1000)                      | (kg/d)                   | (g/d)                     | (kg/<br>kgBW <sup>0.75</sup> /yr) | (kg/<br>kgBW <sup>0.75</sup> /yr) | (kgCO <sub>2</sub> -eq/<br>kgBW <sup>0.75</sup> /yr) |
| <b>WRD</b> |                   |                             |                          |                           |                                   |                                   |                                                      |                                                      |                                                      |                                                      |                                                      |
| ANY        | 130316            | 107371                      |                          | 64                        | 16.17                             | 0.80                              | 15.74                                                | 0.13                                                 | 2.91                                                 | 0.87                                                 | 0.71                                                 |
| LGA        | 27120             | 19951                       |                          | 54                        | 19.57                             | 0.93                              | 18.22                                                | 0.04                                                 | 4.19                                                 | 0.53                                                 | 0.87                                                 |
| LGH        | 2799              | 2444                        |                          | 61                        | 17.68                             | 0.90                              | 17.73                                                | 0.11                                                 | 4.05                                                 | 0.52                                                 | 0.93                                                 |
| LGT        | 10942             | 9836                        |                          | 81                        | 11.21                             | 0.68                              | 12.88                                                | 0.09                                                 | 2.71                                                 | 1.18                                                 | 0.47                                                 |
| MRA        | 38718             | 31334                       |                          | 54                        | 18.21                             | 0.84                              | 16.59                                                | 0.08                                                 | 3.49                                                 | 1.21                                                 | 0.80                                                 |
| MRH        | 14175             | 11652                       |                          | 60                        | 16.93                             | 0.89                              | 16.71                                                | 0.42                                                 | 3.70                                                 | 1.25                                                 | 0.80                                                 |
| MRT        | 18698             | 16285                       |                          | 90                        | 10.79                             | 0.67                              | 12.48                                                | 0.30                                                 | 2.45                                                 | 1.04                                                 | 0.42                                                 |
| Other      | 13282             | 11635                       |                          | 63                        | 15.35                             | 0.71                              | 14.91                                                |                                                      |                                                      |                                                      | 0.68                                                 |
| URBAN      | 5197              | 4233                        |                          | 64                        | 16.45                             | 0.74                              | 15.53                                                |                                                      |                                                      |                                                      | 0.68                                                 |



### c. Concentrate composition for different species

Table S 12 to Table S 14 present the ranges needed for allowing the model to harmonise the baseline grain with the FAO commodity balance sheets.

Table S 12. Minimum and maximum percentage inclusion of feed ingredients in grain concentrates for dairy and beef cattle

|                | Europe<br>min | Europe<br>Max | US<br>Min | US<br>max | Brazil<br>min | Brazil<br>max | China<br>min | China<br>max | LAC<br>min | LAC<br>max | Other | Other |
|----------------|---------------|---------------|-----------|-----------|---------------|---------------|--------------|--------------|------------|------------|-------|-------|
| Maize          | 30            | 50            | 50        | 65        | 65            | 70            | 55           | 65           | 60         | 70         | 50    | 60    |
| Wheat          | 20            | 55            | 10        | 20        | 5             | 10            | 5            | 10           | 5          | 10         | 10    | 30    |
| Barley         | 10            | 15            | 0         | 0         | 0             | 0             | 0            | 0            | 0          | 0          | 0     | 0     |
| sorghum/millet | 0             | 0             | 0         | 0         | 0             | 5             | 0            | 0            | 0          | 20         | 0     | 20    |
| Rice           | 0             | 10            | 0         | 0         | 0             | 0             | 0            | 0            | 0          | 0          | 0     | 15    |
| Rye            | 5             | 20            | 0         | 0         | 0             | 0             | 0            | 0            | 0          | 0          | 0     | 0     |
| Soymeal        | 35            | 45            | 35        | 45        | 30            | 40            | 20           | 30           | 30         | 40         | 20    | 35    |
| Rapeseed       | 4             | 8             | 0         | 0         | 0             | 0             | 0            | 0            | 0          | 0          | 0     | 0     |
| Peas           | 0             | 5             | 0         | 0         | 0             | 0             | 0            | 0            | 0          | 0          | 0     | 0     |
| fish meal      | 0             | 5             | 0         | 0         | 0             | 0             | 0            | 3            | 0          | 5          | 0     | 5     |
| Other          | 5             | 15            | 5         | 20        | 5             | 15            | 5            | 30           | 5          | 15         | 5     | 15    |

Table S 13. Minimum and maximum percentage inclusion of feed ingredients in grain concentrates for pigs

|                | Europe<br>min | Europe<br>Max | US<br>Min | US<br>max | Brazil<br>min | Brazil<br>max | China<br>min | China<br>max | LAC<br>min | LAC<br>max | Other<br>min | Other<br>max |
|----------------|---------------|---------------|-----------|-----------|---------------|---------------|--------------|--------------|------------|------------|--------------|--------------|
| maize          | 10            | 25            | 60        | 65        | 65            | 70            | 55           | 65           | 60         | 70         | 50           | 70           |
| wheat          | 20            | 45            | 8         | 12        | 5             | 10            | 4            | 8            | 5          | 10         | 0            | 15           |
| barley         | 8             | 15            | 0         | 0         | 0             | 0             | 0            | 0            | 0          | 0          | 0            | 0            |
| sorghum/millet | 0             | 0             | 0         | 0         | 0             | 5             | 0            | 0            | 0          | 20         | 0            | 20           |
| rice           | 0             | 0             | 0         | 0         | 0             | 0             | 0            | 0            | 0          | 0          | 0            | 15           |
| rye            | 10            | 20            | 0         | 0         | 0             | 0             | 0            | 0            | 0          | 0          | 0            | 0            |
| soymeal        | 10            | 20            | 10        | 15        | 15            | 22            | 15           | 20           | 15         | 20         | 15           | 25           |
| rapeseed       | 4             | 8             | 0         | 0         | 0             | 0             | 0            | 0            | 0          | 0          | 0            | 0            |
| peas           | 3             | 15            | 0         | 0         | 0             | 0             | 0            | 0            | 0          | 0          | 0            | 0            |
| fish meal      | 0             | 5             | 0         | 0         | 0             | 0             | 0            | 3            | 0          | 5          | 0            | 5            |
| other          | 5             | 15            | 5         | 20        | 5             | 15            | 20           | 30           | 5          | 15         | 5            | 15           |

Notes:

Southern cone of LAC can use wheat up to 30% and maize down to a max of 55% (Argentina, Chile and Uruguay).

Sorghum can be used 30-45% in Africa, which can substitute maize partially

Middle East countries can use wheat from 20 to 45% as in Europe

Table S 14. Minimum and maximum percentage inclusion of feed ingredients in grain concentrates for poultry

|                | Europe<br>min | Europe<br>Max | US<br>Min | US<br>max | Brazil<br>min | Brazil<br>max | China<br>min | China<br>max | LAC<br>min | LAC<br>max | Other<br>min | Other<br>max |
|----------------|---------------|---------------|-----------|-----------|---------------|---------------|--------------|--------------|------------|------------|--------------|--------------|
| Maize          | 20            | 30            | 55        | 65        | 62            | 70            | 60           | 70           | 65         | 70         | 30           | 70           |
| Wheat          | 25            | 45            | 5         | 8         | 0             | 5             | 0            | 0            | 0          | 10         | 0            | 10           |
| Barley         | 5             | 10            | 0         | 0         | 0             | 0             | 0            | 0            | 0          | 0          | 0            | 0            |
| sorghum/millet | 0             | 10            | 0         | 0         | 0             | 5             | 0            | 0            | 0          | 20         | 0            | 20           |
| Rice           | 0             | 0             | 0         | 0         | 0             | 0             | 0            | 0            | 0          | 0          | 0            | 15           |
| Rye            | 0             | 0             | 0         | 0         | 0             | 0             | 0            | 0            | 0          | 0          | 0            | 0            |
| Soymeal        | 10            | 20            | 20        | 25        | 20            | 25            | 10           | 20           | 20         | 25         | 15           | 25           |
| Rapeseed       | 0             | 0             | 0         | 0         | 0             | 0             | 0            | 0            | 0          | 0          | 0            | 0            |
| Peas           | 0             | 5             | 0         | 0         | 0             | 0             | 0            | 0            | 0          | 0          | 0            | 0            |
| fish meal      | 0             | 5             | 0         | 0         | 0             | 0             | 0            | 0            | 0          | 5          | 0            | 5            |
| Other          | 5             | 10            | 2         | 20        | 5             | 15            | 10           | 30           | 5          | 15         | 5            | 15           |

Notes:

Southern cone of LAC can use wheat up to 30% and maize down to a max of 55% (Argentina, Chile and Uruguay).

Sorghum can be used 30-45% in Africa, which can substitute maize partially

Middle East countries can use wheat from 20 to 45% as in Europe

## **7. Estimation of N<sub>2</sub>O emissions from manure management**

### **a. Introduction**

We explain the main assumptions used to estimate N<sub>2</sub>O-N emissions from manure management for each of the livestock systems, indicating continental and regional differences. The estimations of direct and indirect emissions from manure management follow the guidelines of IPCC (123). Emission factors for N<sub>2</sub>O-N, losses through volatilisation, leaching and total losses were estimated from experimental and expert data for the different livestock production systems defined by Sere and Seinfeld (1), modified to include monogastric livestock. Fraction of manure managed for different system was estimated from livestock management data: time spent grazing, and sort of housing facilities. Manure allocated to other uses than agriculture was that used for biogas production and directly used as fuel.

### **b. Feeding and manure management**

Manure management is closely associated to livestock feeding management. Livestock in permanent confinement, such as dairy and fattening systems, are typical of areas densely populated and with good access to markets. In these systems most manure could be recycled. Urinary-N direct losses are relatively large and their magnitude depends on diets, the use of bedding and frequency of removal of the manure from the housing facilities. Ideally, up to 90-95% of manure could be recycled, with inevitable losses of NH<sub>3</sub>-N during excretion, for livestock fed N-rich diets (124). Common recovery from livestock housing would be around 60-80%, with extremes of 30-95%.

Semi-confined livestock systems are typical of intensified livestock systems, which make use of seasonal grazing. About 50-60% of manure is commonly managed because livestock are usually confined during the night and during the cool season. Management of urine varies across systems and the magnitude of the N losses depends on use of and type of bedding, and housing facilities. In cases of poor quality of housing, and no use of bedding recycling of manure could be as low as 20-30%.

Free-grazing with night stalling is probably the most wide-spread feeding management in extensive livestock systems. Livestock graze in rangeland and cropland and is kept overnight in stalls or pens, where it may receive supplementary feeds. At best 40-50% of manure can be recycled, when bedding is used. Otherwise, manure recycled would be 20-40% of the manure excreted provided that there is frequent removal. An additional fraction is left in cropland and directly recycled, exposed to nutrient losses.

Free-grazing using night corralling is a system in which livestock overnight in relatively small areas of cropland to manure the land. Manuring contracts are often used in the West African savannas (Niger, Mali, Burkina Faso, Chad, Mauritania, Northern Nigeria, Northern Cameroon), where large amounts of manure are excreted in relatively small areas, leading to relatively large nutrient losses though volatilization and leaching (125). System wise, land manured through manuring contracts does not represent a large area.

Free-grazing is typical of pastoral systems, where manure is practically not recycled in cropland, though partly used as fuel and building material. These systems are observed in large parts of Africa and Central Asia, and in the South American Antiplano and the Patagonia.

### **c. Manure management**

Emissions from manure depend on collection and storage management before application to arable land. Across continents, the fate of manure excreted in housing facilities differ: In Europe, strong regulations lead to full recycling of manures, partly in grasslands and croplands, and partly for biogas production (126). In Africa, most manure is not returned to grasslands. In intensive livestock systems, composted manure may be applied to fodder crops, but the large majority is applied to food and cash crops (e.g. coffee, tea, tobacco). In highly populated areas of Asia, most manure is destined to different and competing uses such as organic fertiliser, feed for fish ponds, biogas production, and biofuel (i.e. burnt for cooking). In North America, manure is not fully recycled. There are livestock systems in which manure is indirectly discharged into waterbodies (127). Use of manure for biogas production is increasingly gaining attention but it is not yet widespread (128).

### **d. Emission factors for manure management**

We used equation 10.25 to 10.29 from IPCC (123) to estimate emissions from manure management. For that purpose we gathered estimates of: fraction of manure managed ( $MS$ ), fraction of manure allocated to other uses, direct emission factor for excreted manure ( $EF_3$ ), fraction lost through volatilisation ( $Frac_{GasMS}$ ), emission factor from volatilised N ( $EF_4$ ), fraction leached ( $Frac_{leachMS}$ ), emission factor for leached N, and total N loss during management ( $Frac_{LossMS}$ ).

To select values for emission factors, we considered the most typical manure management for each livestock system. For example in mixed highland systems in Africa manure can be: i) directly applied to cropland, ii) piled in heaps or placed in pits mixed with bedding material, iii) left to accumulate during the dry season in the livestock facilities and then applied to cropland, iv) left to accumulate in the corral, and removed periodically for composting.

The values of the emission factors proposed by IPCC (123) were compared with measurements by (129-133).

N excreted by ruminants (cattle, sheep and goats) for different livestock system has been calculated using the RUMINANT model. That includes the  $N_{(T)}$  and  $N_{ex(T)}$  of equation 10.25 in IPCC (123). For pigs and poultry excretion rates have been extracted from the literature and are presented in Table S 15 and Table S 16. Fraction managed ( $MS_{(T,S)}$ ), is the manure available for recycling in agricultural land. Fraction managed is considered the amount of excreta that may be recycled because it accumulates in corrals, stalls, pens, sheepfolds, and other livestock housing. Other uses of manure include burning, material for building, and

biogas. Thus, it excludes manure that is used as fuel, or as construction material. The fraction managed depends largely on the feeding system.

#### **e. Indirect N<sub>2</sub>O emissions from manure management**

After excretion, manure is exposed to losses through volatilisation and leaching. The value of the fraction lost through volatilisation ( $\text{Frac}_{\text{GasMS}}$ ), and of the fraction leached during storage ( $\text{Frac}_{\text{leachMS}}$ ) depends on manure management methods and duration of the storage. The default emission factors for volatilised losses ( $\text{EF}_4$ ) and for leached losses ( $\text{EF}_5$ ) were compared to those reported in the literature (129, 134-138).

We indicate ranges for coefficients for each of the 4 methods of manure management:

- i. Manure directly applied:  $\text{Frac}_{\text{GasMS}}$  3-10% depending on the management of the urine,  $\text{Frac}_{\text{leachMS}} < 5\%$  because of the short exposure to water throughput.
- ii. Manure stored solid in heaps, pits or stock piled:  $\text{Frac}_{\text{GasMS}}$  15-50% depending on the length of the storage, the use of cover, and type of floor (e.g. heaps volatilise more N than pits),  $\text{Frac}_{\text{leachMS}} < 5-30\%$ , pits lose considerably more than heaps if they are unsealed. Leaching can be minimised with a solid floor and cover to prevent rain throughput.
- iii. Manure stored solid in livestock housing (e.g. deep litter or corrals), and then applied to cropland:  $\text{Frac}_{\text{GasMS}}$  15-50% depending on the length of the storage,  $\text{Frac}_{\text{leachMS}} < 20-30\%$  depending on rain throughput.
- iv. Manure stored in corrals and collected for composting: similar to previous, losses smaller ( $\text{Frac}_{\text{GasMS}}$  30-50%) depending on the length of the storage,  $\text{Frac}_{\text{leachMS}} < 10-20\%$  depending on rain throughput.
- v. Manure stored in lagoons: gaseous losses will depend on whether lagoons form a crust or not, ( $\text{Frac}_{\text{GasMS}}$  20-30%), leaching will depend on type of lagoon ( $\text{Frac}_{\text{leachMS}}$  0-20%)

#### **f. Livestock systems assumptions**

##### ***Livestock Grazing Temperate/tropical highlands (LGT)***

In Africa, the livestock feeding management of LGT is characterised by free-grazing and free-grazing with night corralling. Most excreta from grazing small ruminants is left in grazing land (139, 140). Small amounts of manure may be collected from cattle sheds and applied without composting to croplands: about 30-40% for dairy cows, and substantially less for other cattle and small ruminants, which spent more time in the range (141). A small fraction of that manure is used as fuel for cooking (less than 20%). Manures contain relatively small amount of mineral N, which is mostly lost soon after excretion. Emission factors of N<sub>2</sub>O-N during manure management will correspond to those of dry lots. Volatilisation and leaching are limited by low availability of mineral N and slow decomposition rates.

The highlands of Latin America (i.e. the Andean region) represent LGT. Small ruminants and camelids are the main livestock species. Manure is mainly recycled in small-scale farms of

the Antiplano and in the highlands of Colombia, Ecuador, Peru and Bolivia. Because livestock graze in paddocks or open grasslands during the day and overnight in pens or sheds, we assumed that only up to 30-40% of the manure may be recycled for dairy system, while considerably less for other cattle and small ruminants (142, 143). A substantial amount of the collected manure (10-20%) is directly used as fuel, or to produce biogas in the Antiplano (144, 145).

In Asia, LGT are represented by the vast rangelands of central Asia. Manure that accumulates in livestock facilities (e.g. sheepfolds) is recycled and used as fuel (146, 147). Emission factors correspond to those of dry lots.

In Europe, LGT is represented in northern UK, and Scandinavia, with ruminant systems based on grazing. Manure is left in grasslands and what accumulates (30-40%) in livestock facilities is stored solid or as slurry and applied to grasslands (148). A small proportion (less than 10%) is used to produce biogas (149).

For North America, similar figures to those of Europe were assumed: most manure is left in rangelands (50-60%), and from the proportion accumulates in housing facilities; a small part (0-5%) is destined to biogas production (128, 150, 151). Emission factors are those for dry lots and solid storage. N losses from manure management can be between 20-40% (152).

### ***Livestock Grazing Humid-Subhumid Tropics and Subtropics (LGH)***

In Africa, LGH is represented by cattle ranching systems, with little recycling of manure to agricultural land. Small ruminants are kept for local consumption but their manure is usually not recycled. Manure accumulates in livestock facilities exposed to losses and removed with a low frequency (e.g. once a year) to be sold to crop farmers, to be applied to arable land or to be used as fuel (less than 20%) (153, 154). The total fraction recycled for dairy cattle is about 30-40%. Manure management is considered waste management from animal production, and often left unused (155). Emissions of N<sub>2</sub>O-N during manure management will correspond to those of solid and pit storages. Nutrient losses through volatilisation (30-40%) and leaching (10-20%) are relatively larger than in LGT due to richer diets, higher temperatures and moisture regimes than LGT.

In Latin America, LGH is represented by typical ranches in the lowlands, and in the Amazonian region. Small proportion of the manure is managed (20-30%), which accumulate in the livestock facilities. Total N losses can be high (50-70%) due to poor management, prolonged storage periods, and the hot and humid climate(156).

In Asia, LGH is represented by small areas in SE Asia, e.g. Thailand, Indonesia, Myanmar, Laos and Papua New Guinea. Because of the high mobility of livestock and the free grazing, small amounts of manure are recycled into cropland (157, 158).

In Europe, LGH is only represented in small areas of Ireland and France. This system is similar to LGT with 50-60% of the manure that accumulates in livestock facilities being recycled, and slightly larger losses due to volatilisation (20-30%) (159).

In North America, LGH is represented by relatively small areas in Texas, Florida and Oklahoma. It was assumed that only 20-30% of the manure is recycled because livestock remains longer outdoors than in the European LGH system. The rest of the emission factors were assumed to be similar to those of the European LGH.

### ***Livestock Grazing Arid/semiarid (LGA)***

In LGA in Africa, pastoralist systems dominate, with farmers keeping cattle, small ruminants and camels. There is much mobility in these systems (155, 160), determining that little manure is recycled (i.e. 10-20%). Cropping is not very important in these systems, and therefore only manure that accumulates in temporary corrals (kraals) may be collected to be used in crop production (161-163). Losses through leaching are smaller than in LGT (125, 164). Emission factor for direct losses during manure storage is that of corresponding to dry lots.

In Latin America, LGA is presented by the Grand Chaco, the Patagonia, and the Mexican matorrales and Venezuela double purpose systems. Recycling of manure in agriculture varies according to the management of the different livestock species. While in sheep-dominated systems cycling could be little of the excreted N (165, 166), in systems with dairy cattle cycling may rise to about 40%. We assumed an average of 10-20% for cattle systems in Latin America to account for the inherent heterogeneity. In the extensive sheep systems of the Patagonia there is almost no recycling of manure into cropping land, whereas in the more intensive cattle and goat systems of the Grand Chaco and the matorrales, manure is often used in agriculture (166).

In Asia, LGA occurs in Central and Western China, Tibet, Afghanistan, Iran, Pakistan and in the Arabian Peninsula. Because of the mobility of livestock in search of good grazes in inherently poor environments, manure recycling in agriculture is limited. We assumed that only 20-30% of excreted manure can be recycled; this is the manure that accumulates in stalls and is used for cultivation during the summer months (167, 168).

In Europe, LGA occupies relatively small areas in Greece and Cyprus. It was assumed that in this system a combination of small ruminants and cattle coexist, 30-40% of manure is managed mainly as solid storage.

In North America, LGA occupies vast areas in the US (i.e. Arizona, Nevada, New Mexico, Texas, Utah, Colorado and California). In this system there is a combination of small and large ruminants, with intensive and extensive management. Recyclable manure is assumed to be between 30-40% to account for the extensive small ruminant systems (169-171). Manure is managed mainly as dry lots.

### ***Mixed Farming Rainfed Temperate /tropical highlands (MRT)***

In African mixed systems of highly populated areas, manure is intensively recycled in agricultural land. Depending on feeding methods, from 50 to 70% of manure N excreted can be recovered and utilised (172). Nitrogen losses through volatilisation of  $\text{NH}_3\text{-N}$  and  $\text{NO}_x\text{-N}$



can be large (30-40%), as well as losses through leaching with poor management (173-175). Collected manure is stored in heaps or pits usually mixed with plant residues, and therefore NO<sub>2</sub> emission factors are relatively smaller than for other systems. Small proportion of the collected manure is used to produce biogas (176).

In Europe, dairy and beef cattle are mostly kept confined with seasonal grazing. Pigs and poultry are fully managed in confinement. Between 60-70% of the manure is collected in housing systems whereas the rest is left unmanaged in grazing land (126). More than half of the manure is managed as slurry or liquid (in northern Europe) and the rest solid (mainly in Eastern Europe, UK and France). Manure use for biogas production is only important in Germany, Austria and Denmark (177). Ammonia losses from dairy and beef production systems were taken from (178, 179).

### ***Mixed Farming Rainfed Humid-Subhumid Tropics and Subtropics (MRH)***

These systems differ from MRT basically in the smaller fraction of manure managed (i.e. 50-60%) and relatively larger losses due to poor management between collection and relatively little application of manure to soils (154). Losses through volatilisation may be smaller than for the highland system, because diets are poorer in N, but losses through leaching are larger due to more rainfall and poorer management (180). Little manure is used for other purposes (i.e. 10-20%) than organic fertilizer (176).

For North America and Europe, we assumed N<sub>2</sub>O emissions during composting to be 1-6% of total losses (181). The use of manure as fertiliser for rice and vegetables is widespread throughout SE Asia (182). In India the use of manure as fuel is widespread especially in the central states. It is estimated that between 50-60% of total ruminant manure is recycled and 40% of that is used a biofuel (183, 184).

### ***Mixed Farming Rainfed Arid/semiarid (MRA)***

MRA comprises mostly free-grazing systems with night stalling or corralling which limits the amounts of manure that can be recycled to 40-50% (125, 163). Manure management is usually poor, left to accumulate in livestock facilities with or without bedding and not composted or composted for short periods (185) and applied to crops (162). Emission factors for nitrous oxides will be those of dry lots. Losses due to volatilisation are relatively larger than losses due to leaching because storage usually takes place in the dry season.

In India and Bangladesh between 70-80% of the households use cow manure for as fuel for cooking (186-188). From the manure available for recycling, farmers use about 50% as fuel (189), use increasing from South to North. However the use of manure as biofuel in China is minimal (188).

Temperate/tropical highlands (MIT), Humid/subhumid (MIH), Arid/semiarid (MIA): similar to the non-irrigated MRT, MRH and MRA. Irrigated systems are usually more intensively managed, so recycling of manure would be relatively larger as well as losses due to volatilisation and leaching.

### *Pigs smallholder (PIsm)*

Excretion rates for pigs vary between 10-20 kg N per year (190-192). For the traditional systems rates vary between 11-16 kg N per year, while the industrial rates systems rates are higher. Annual excretion rates are reported in (193) to be for pigs of 4.9-8.4 kg N per head, and for poultry about 0.17-0.43 kg N per bird per year.

Free range is mostly practiced by pig smallholder farmers in Africa, Latin America and SE Asia. Smallholder pig farms are not common in Europe and North America, although they are observed in Eastern Europe.

In Africa, the traditional system represents between 60-80% of the pigs population (12). Pigs usually roam around during the day and are kept in a pen during the night, or are tethered at the house compounds. In West Africa, (i.e. Burkina Faso, Senegal, Cameroon, Ghana, Nigeria) pigs are tethered during the cropping season to avoid damage to crops, and in some others they are fully confined (194-198). For example, in western Kenya, most pig farms do not use housing, but most pigs are tethered. Most pig shelters have mud floors which are hardly cleaned. Few farmers (<2%) keep their pigs indoors (26). In southern Africa (i.e. Zambia, Mozambique, Botswana) pigs are mostly managed under free-ranging, with few farmers using a combination of free ranging and confinement with penning during the night; few farmers clean their pigs' pens (199-201). Recyclable manure is around 40-50% during free ranging and 60-80% during confinement. Small amounts of manure are recycled and applied to crops (i.e. 0-25%), the fraction that accumulates in the pens after relatively large N losses (202). Emissions from the pens can be large, although smallholders usually keep few animals (one to five). Direct emissions from manure are assumed to be that of solid storage. In Africa pig manure is not used to produce biogas (176).

In Latin America, smallholders keep their pigs free-ranging in some places, and are confined only during the cropping season, with no or little recycling of the manure (203). The north of Brazil has a large concentration of smallholder pig farms, commonly known as backyard production (204).

In Asia, smallholder farm pigs are mostly managed in confinement (205). Vietnam has the largest pig population in SE Asia, with more than 70% households keeping pigs (206). Manure that accumulates in pens is used mainly as fertiliser for crops, for fish ponds, and in a small extent to produce biogas, in general less efficiently used than in industrial farms. About 50-60% of the manure can be managed. Estimates of (207) for Vietnam indicate that almost half of the manure is used for biogas production, and the other half is more or less equally partitioned between crops, fish ponds, for sale and discharged.

In northern Laos, most pigs are kept in smallholder farms and are managed using a free and semi-scavenging feeding system. Pig manure is usually collected and used as fertiliser on rice and other crops. There are not many biodigesters in Laos but if people have it they will certainly use pig manure to feed into the biodigester. In Cambodia, biodigesters are gaining popularity and pig manure is used to produce biogas (208).

Pig production in NE India consists of small farms keeping their pigs fully confined (209) and stall-fed with locally available feeds. About sixty percent of the farmers use the manure for composting and application to crops, or to feed fish ponds. The rest leaves the manure unused (210). When compost is prepared, manure is mixed with the bedding materials.

### ***Pigs industrial (PIin)***

Industrial or commercial pig farms in Africa are characterized by confined animals, of better breeds and feeds than the traditional system (12).

In Latin America, Brazil is the larger pig producer (4<sup>th</sup> largest in the world). The Santa Catarina state in South Brazil has traditionally had the largest concentration of industrial pig farms in Latin America (204). In the last decade, pig production has intensified and expanded into the Central and West region (211). In these intensive systems, pigs are mostly kept in confinement, and manure managed as slurry in lagoons and applied to the soil afterwards. A fraction of the manure is used to produce biogas, or alternatively composted to reduce transport cost and increase fertiliser value.

In Asia, most pigs are concentrated in China (212). Industrial pig farms are concentrated around urban areas such as Hanoi, Bangkok, Manila, Guangzhou, and in highly populated areas such as the SE Chinese coast or the area between Shanghai and Beijing, and in India in the Ganges basin (193). These farms keep their animals confined, so most of the manure is managed (70-80%). Little manure is applied to cropland due to fears of contamination and nutrient overdoses, instead manure is preferentially used to feed fish ponds or for biogas production (213). Manure is managed mostly as slurry or solid manure. Slurry is used for biogas or directly fed to fish ponds. Solid manure can be composted in heaps and applied to crops. N losses before application are estimated to be 20-30% for covered containers and between 60-80% for uncovered containers (214). Large-scale farms often sell manure to crop farmers, or to be used as cattle feed. In Vietnam, most farmers house their pigs, and almost half of the pig farms use manure for biogas production, and few applied it to the land (207). Sheds are usually cleaned daily. A large proportion of the pig manure (ca. 20%) is discharged into the sewage system. Emission factors for manure management are assumed to be those for solid storage and anaerobic lagoons.

European pig production is most developed in eight countries/regions: Denmark, Belgium, Netherlands, northern Germany, Brittany (France), Catalonia and Aragon (Spain) and Po valley (Italy). In the United States, the case of North Carolina is another example of concentrated area where the use of anaerobic lagoons dominates (215).

In Europe, the pig industry uses to handle manure mainly tanks, anaerobic lagoons, and in smaller scale aerobic processing and anaerobic digestion (215). Losses of N have been estimated from (216, 217). Manure is increasingly being used for biogas production, with estimates for Belgium, The Netherlands, UK, and Italy of 30-40% (126). Emission factors are those for anaerobic lagoons. Emission of ammonia from housing ranges between 40-55%, and between 3-23% for storage, leaching represents a small amount of the total losses (130, 218).

In the intensive pig production systems of North America, manure is mostly managed as slurry and stored in lagoons, and to a smaller extent as solid manure, both applied to the land (219). The pig industry in the US is concentrated in the Mid-West and has been shifting towards the southeast (169, 170). In Canada, most pig farms are concentrated in the Eastern Coast especially the St. Lawrence Lowlands and Manitoulin Lake Simcoe-Frontenac Axis. Most manure is managed N (70-80%), although with relatively large ammonia volatilisation losses (i.e. 30-50%) (220).

### ***Poultry smallholder (POsm)***

Most poultry production takes place in E and SE Asia (China, Thailand, Vietnam, Malaysia, Philippines, South Korea, Cambodia, Laos, and Myanmar), followed by the Americas (212). Excretion rates vary between 0.3-0.6 kg N per year per bird (190-192). The low end of the range corresponds to the traditional system, and the high end to the industrial ones.

Most egg and broiler production in India comes from the states of Andhra Pradesh, Maharashtra, Tamil Nadu, Punjab, Haryana and Karnataka (221). Smallholder poultry production in Africa is based on free scavenging systems dominated by indigenous chicken. The small proportion of manure that is recycled is subjected to large losses as it is exposed to weather and air dried for conservation. Total N losses are of the order of 70-80% (222). In Latin America, most poultry systems produce solid manure, with or without litter. In smallholder systems poultry manure accumulates where the birds overnight. In some places, people build containment structures, which are not so often cleaned. Manure mixed with litter is usually composted and applied in vegetable production.

### ***Poultry industrial (POin)***

Modern large-scale layer and broiler operations belong to the group of concentrated animal feeding operations (CAFO). Manure recycling depends on the management system: in deep litter houses, manure is collected only once a year for laying hens and after each batch for broilers. In battery cage units, manure is removed, once a month, it depends on the fly problems. Poultry manure from battery cages is sometimes used to feed cattle. Poultry manure managed by water flushing can be used to produce biogas through anaerobic digestion, although it is not widely applied.

In Africa, industrial poultry production is still incipient, mostly due to the difficulties to compete with international markets. There is some development around African cities where manure is mostly managed with litter (223).

In North America, most pig and poultry production takes place in small to medium AFOs (Animal Feeding Operations) (224). Majority of poultry farmers lease the birds from integrators who are responsible for hatcheries, feed mills and processing plants (225). Broiler growers working with integrators usually do not treat waste because of the added costs (226). It is estimated that about 20-35% of poultry litter is fed to cattle in the US (227). In Canada, broilers are raised in single floor barns on a bed of straw or wood chip litter (228). Barns are fully cleaned once per cycle, when new litter is added. In the US, new litter is added after each cycle but barns are usually cleaned once a year (229).

High-rise and manure-belt houses are the two most common housing types used by layer operations in the US and in Canada. In the high rise houses, solid manure is stored for about a year before removal. Manure in manure-belt houses drops onto a belt beneath cages and is frequently removed from the house, e.g. two to seven times a week (228, 230). Manure can be either stored as slurry in tanks or removed from barns frequently. The majority of poultry farmers in Canada store the manure uncovered and spread it directly to the land (228).

In the UK, about 70% of the poultry operations use litter to manage manure, while for the rest droppings are collected without litter (231). About 25% of layers hens are kept in free-range systems. Most broiler farmers (63%) store the manure during the production cycle in uncovered piles or heaps. The rest applies it directly to the field. About 60% of the farmers use belt and scrapper systems, and the rest deep litter (231).

## 8. Estimation of CH<sub>4</sub> emissions from manure management

We follow Tier 2 from IPCC (123) (Eq. 10.22). To estimate  $ET_{(T)}$ , we provide estimates of  $VS_{(T)}$ ,  $Bo_{(T)}$ ,  $MCF_{S,k}$ . Fraction of manure managed (MS) is extracted from the tables to estimate nitrous oxides emissions.

$VS_{(T)}$  has been estimated using Eq. 10.24 and qualities of the diets of animals (section 6). To estimate MCFs, we use average annual temperature per pixel and the dominant manure management system for each species group: dairy, other cattle, small ruminants, and poultry and pigs (Table S 22 - Table S 25). We have chosen a dominant manure management system for most regions except for Europe and North America cattle where combinations of solid storage and slurry dominate. When that is the case, we indicate the proportion of total manure (e.g. 1/3) that is allocated to one management system. See Table S 22-Table S 23.  $MCF_{S,k}$  can be extracted from Tables 10A-4, 10A-5, 10A-7 from IPCC (123). There are no coefficients for small ruminants, so we used those of other cattle (Table 10A-5). We choose the coefficients of emissions due to other uses assuming that in Europe, North America all manure for other uses goes to biogas production (digester in the Tables). In Latin America manure from pigs and dairy destined to other uses would be used for biogas production, and the rest to feed other livestock. In Asia and Africa, manure destined to other uses is assumed to be burnt for fuel.

To calculate the methane emission factor  $ET_{(T)}$ , we use Eq. 10.23 from (123). The values for  $Bo_{(T)}$ , are also reported in tables 10A-4, 10A-5, 10A-7, with some differences across regions.

### *Acknowledgements*

We are grateful for the advice received for the characterisation of manure management from Henk Udo (S and SE Asia), Dai Peters (SE Asia and Africa), Gerome Sambou (West Africa), Jean-Michel Medoc (Vietnam), Carlos Leon-Velarde (Latin America), Werner Stur (Cambodia), Ben Lukuyu (East Africa), and general comments from Lex Bouwman and Bert Janssen.

Table S 15. Excretion rates for pigs for smallholder and industrial systems across continents

| Livestock system                  | Pigs                                                                 |                                             | Industrial                                            |                                             | References |
|-----------------------------------|----------------------------------------------------------------------|---------------------------------------------|-------------------------------------------------------|---------------------------------------------|------------|
|                                   | Smallholder<br>Dry matter<br>(kg pig <sup>-1</sup> d <sup>-1</sup> ) | N<br>(g pig <sup>-1</sup> d <sup>-1</sup> ) | Dry matter<br>(kg pig <sup>-1</sup> d <sup>-1</sup> ) | N<br>(g pig <sup>-1</sup> d <sup>-1</sup> ) |            |
| Africa –growing (28 kg)           | 0.17-0.21                                                            | 15.5-16.5                                   |                                                       |                                             | (232)      |
| Africa –piglets (15 kg)           |                                                                      |                                             | 0.07-0.12                                             | 6.5-9.1                                     | (233)      |
| Latin America – piglets (20 kg)   | 0.12-0.14                                                            | 8.8-9.8                                     | -                                                     | 5.6-7.0                                     | (234, 235) |
| Latin America – growing (40 kg)   | 0.25-0.32                                                            | 21.8-45.4                                   | 0.32-0.44                                             | 27.0-27.6                                   | (236, 237) |
| Europe                            |                                                                      |                                             |                                                       |                                             |            |
| Northern – growing (50-80 kg)     |                                                                      |                                             | 0.20-0.30                                             | 21.1-34.3                                   | (238, 239) |
| Southern – heavy pigs (80-160 kg) |                                                                      |                                             | -                                                     | 26.9-37.8                                   | (240, 241) |
| Southern – growing (20-40 kg)     |                                                                      |                                             | -                                                     | 14.5-26.1                                   | (242)      |
| North America                     |                                                                      |                                             |                                                       |                                             |            |
| US – growing (50 kg)              |                                                                      |                                             | 0.14-0.27                                             | 7.0-18.9                                    | (243)      |
| Canada – growing (20-32 kg)       |                                                                      |                                             | -                                                     | 9.4-26.2                                    | (244, 245) |
| Asia – growing (50 kg)            | 0.20-0.38                                                            | 13.5-25.9                                   | 0.20-0.30                                             | 12.1-18.7                                   | (246, 247) |
| Asia – piglets (10 kg)            | 0.20-0.25                                                            | 3.0-4.0                                     |                                                       |                                             | (248)      |
| China – pigs average              |                                                                      |                                             | 0.20-0.50                                             | 12.3                                        | (249)      |
| Korea - finishing                 |                                                                      |                                             | 0.26-0.27                                             | 8-29                                        | (250)      |



Table S 16. Excretion rates for poultry for smallholder and industrial systems across continents

| Livestock system            | Poultry Smallholder                                    |                                              | Industrial                                             |                                              | References |
|-----------------------------|--------------------------------------------------------|----------------------------------------------|--------------------------------------------------------|----------------------------------------------|------------|
|                             | Dry matter<br>(kg bird <sup>-1</sup> d <sup>-1</sup> ) | N<br>(g bird <sup>-1</sup> d <sup>-1</sup> ) | Dry matter<br>(kg bird <sup>-1</sup> d <sup>-1</sup> ) | N<br>(g bird <sup>-1</sup> d <sup>-1</sup> ) |            |
| Africa - broilers           | 0.013-0.017                                            | -                                            | 0.044-0.054                                            | 0.3-0.7                                      | (251, 252) |
| Africa – finishing broilers | 0.064-0.073                                            | 1.6-1.7                                      |                                                        |                                              | (253)      |
| Latin America               |                                                        |                                              |                                                        |                                              |            |
| Broilers                    |                                                        |                                              |                                                        | 0.7-1.3                                      | (254)      |
| Hens                        |                                                        |                                              | 0.027-0.029                                            | 1.2-1.3                                      | (255)      |
| Europe                      |                                                        |                                              |                                                        |                                              |            |
| Northern - hens             |                                                        |                                              | 0.034                                                  | 1.8                                          | (256)      |
| Northern - broilers         |                                                        |                                              | 0.036                                                  | 1.4                                          | (256)      |
| Southern                    |                                                        |                                              |                                                        |                                              |            |
| Eastern - broilers          |                                                        |                                              |                                                        | 1.2-1.4                                      | (257)      |
| North America               |                                                        |                                              |                                                        |                                              |            |
| Canada - hens               |                                                        |                                              | 0.027-0.028                                            | 1.3-2.0                                      | (228, 258) |
| Canada – broilers           |                                                        |                                              |                                                        |                                              |            |
| US - hens                   |                                                        |                                              | 0.026                                                  | 1.0-1.5                                      | (259, 260) |
| US - broilers               |                                                        |                                              |                                                        | 1.1-2.3                                      | (261, 262) |
| Asia                        |                                                        |                                              |                                                        |                                              |            |
| China average poultry       |                                                        |                                              | 0.021-0.048                                            | 0.8-1.0                                      | (249)      |
| Korea - Broilers            |                                                        | 0.5-1.9                                      |                                                        | 1.2-1.5                                      | (263, 264) |
| India - Broilers            |                                                        |                                              | 0.019-0.038                                            | 0.5-1.3                                      | (265)      |

Table S 17. N<sub>2</sub>O emissions from manure management for livestock production systems in sub-Saharan Africa

|                                              | Livestock system   | Fraction*<br>manure N<br>managed<br>(%)<br>MS <sub>(T,S)</sub> | Fraction<br>manure to<br>other uses<br>(%) | N <sub>2</sub> O<br>emission factor<br>(kg kg <sup>-1</sup> manure N<br>excreted)<br>EF <sub>3(S)</sub> | NH <sub>3</sub> +NO <sub>x</sub><br>volatilisation<br>(fraction)<br>Frac <sub>GasMS</sub> | N <sub>2</sub> O<br>emission factor<br>(kg kg <sup>-1</sup> NH <sub>3</sub> +NO <sub>x</sub><br>volatilised)<br>EF <sub>4</sub> | N leached<br>from manure<br>(fraction)<br>Frac <sub>leachMS</sub> | Total N loss<br>from MMS<br>Frac <sub>LossMS</sub> | N <sub>2</sub> O<br>emission factor<br>(kg kg <sup>-1</sup> N<br>leached)<br>EF <sub>5</sub> | Examples of systems                                                                                                                                    |
|----------------------------------------------|--------------------|----------------------------------------------------------------|--------------------------------------------|---------------------------------------------------------------------------------------------------------|-------------------------------------------------------------------------------------------|---------------------------------------------------------------------------------------------------------------------------------|-------------------------------------------------------------------|----------------------------------------------------|----------------------------------------------------------------------------------------------|--------------------------------------------------------------------------------------------------------------------------------------------------------|
| <u>Rangeland-based systems</u>               | LGT – dairy        | 30-40                                                          | 10-20                                      | 0.02                                                                                                    | 20-30                                                                                     | 0.01                                                                                                                            | <5                                                                | 50-60                                              | 0.0075                                                                                       | Ethiopia, South Africa                                                                                                                                 |
|                                              | Other cattle       | 20-30                                                          | 0-10                                       | 0.02                                                                                                    |                                                                                           |                                                                                                                                 |                                                                   |                                                    |                                                                                              |                                                                                                                                                        |
|                                              | Small ruminants    | 0-10                                                           | 0                                          | 0.02                                                                                                    |                                                                                           |                                                                                                                                 |                                                                   |                                                    |                                                                                              |                                                                                                                                                        |
|                                              | LGH – dairy        | 30-40                                                          | 10-20                                      | 0.02                                                                                                    | 30-40                                                                                     | 0.005-0.01                                                                                                                      | 10-20                                                             | 50-70                                              | 0.0075                                                                                       | Angola, Benin, Cameroon,<br>Central African Republic,<br>Congo, Cote d' Ivoire,<br>Guinea, Nigeria, Sudan                                              |
|                                              | Other cattle       | 20-30                                                          | 0-10                                       | 0.02                                                                                                    |                                                                                           |                                                                                                                                 |                                                                   |                                                    |                                                                                              |                                                                                                                                                        |
|                                              | Small ruminants    | 0-10                                                           | 0                                          | 0.02                                                                                                    |                                                                                           |                                                                                                                                 |                                                                   |                                                    |                                                                                              |                                                                                                                                                        |
|                                              | LGA– dairy         | 20-30                                                          | 5-10                                       | 0.02                                                                                                    | 20-30                                                                                     | 0.01                                                                                                                            | <5                                                                | 50-60                                              | 0.0005                                                                                       | Angola, Botswana, Chad,<br>Ethiopia, Kenya,<br>Madagascar, Mali,<br>Mauritania, Mozambique,<br>Namibia, Niger, Somalia,<br>South Africa, Sudan, Zambia |
|                                              | Other cattle       | 10-20                                                          | 0-10                                       | 0.02                                                                                                    |                                                                                           |                                                                                                                                 |                                                                   |                                                    |                                                                                              |                                                                                                                                                        |
|                                              | Small ruminants    | 0-10                                                           | 0                                          | 0.02                                                                                                    |                                                                                           |                                                                                                                                 |                                                                   |                                                    |                                                                                              |                                                                                                                                                        |
| <u>Mixed farming systems<br/>(Rainfed)</u>   | MRT – dairy        | 60-70                                                          | 10-20                                      | 0.005                                                                                                   | 30-40                                                                                     | 0-0.005                                                                                                                         | 20-30                                                             | 40-70                                              | 0.0075                                                                                       | Highlands of East and<br>Central Africa                                                                                                                |
|                                              | Other cattle       | 40-50                                                          | 10-20                                      | 0.005                                                                                                   |                                                                                           |                                                                                                                                 |                                                                   |                                                    |                                                                                              |                                                                                                                                                        |
|                                              | Small ruminants    | 20-30                                                          | 0                                          | 0.02                                                                                                    |                                                                                           |                                                                                                                                 |                                                                   |                                                    |                                                                                              |                                                                                                                                                        |
|                                              | MRH – dairy        | 50-60                                                          | 10-20                                      | 0.005                                                                                                   | 30-40                                                                                     | 0.005-0.01                                                                                                                      | 10-20                                                             | 50-70                                              | 0.0075                                                                                       | Cameroon, Congo, Cote<br>d'Ivoire, Ghana, Nigeria                                                                                                      |
|                                              | Other cattle       | 30-40                                                          | 0-10                                       | 0.005                                                                                                   |                                                                                           |                                                                                                                                 |                                                                   |                                                    |                                                                                              |                                                                                                                                                        |
|                                              | Small ruminants    | 10-20                                                          | 0                                          | 0.02                                                                                                    |                                                                                           |                                                                                                                                 |                                                                   |                                                    |                                                                                              |                                                                                                                                                        |
|                                              | MRA – dairy        | 40-50                                                          | 10-20                                      | 0.02                                                                                                    | 30-40                                                                                     | 0.01                                                                                                                            | <5                                                                | 50-60                                              | 0.0075                                                                                       | Botswana, Burkina Faso,<br>Chad, Kenya, Mali,<br>Mozambique, Niger, Nigeria,<br>South Africa, Sudan,<br>Tanzania, Zambia,<br>Zimbabwe                  |
|                                              | Other cattle       | 30-40                                                          | 10-20                                      | 0.02                                                                                                    |                                                                                           |                                                                                                                                 |                                                                   |                                                    |                                                                                              |                                                                                                                                                        |
|                                              | Small ruminants    | 0-20                                                           | 0                                          | 0.02                                                                                                    |                                                                                           |                                                                                                                                 |                                                                   |                                                    |                                                                                              |                                                                                                                                                        |
| <u>Mixed farming systems<br/>(Irrigated)</u> | MIT – dairy        | 60-70                                                          | 10-20                                      | 0.005                                                                                                   | 30-50                                                                                     | 0-0.005                                                                                                                         | 20-30                                                             | 50-70                                              | 0.0075                                                                                       | Ethiopia, South Africa                                                                                                                                 |
|                                              | Other cattle       | 40-50                                                          | 10-20                                      | 0.005                                                                                                   |                                                                                           |                                                                                                                                 |                                                                   |                                                    |                                                                                              |                                                                                                                                                        |
|                                              | Small ruminants    | 20-30                                                          | 0                                          | 0.02                                                                                                    |                                                                                           |                                                                                                                                 |                                                                   |                                                    |                                                                                              |                                                                                                                                                        |
|                                              | MIH – dairy        | 50-60                                                          | 10-20                                      | 0.005                                                                                                   | 30-40                                                                                     | 0.005-0.01                                                                                                                      | 10-20                                                             | 50-70                                              | 0.0075                                                                                       | Ethiopia                                                                                                                                               |
|                                              | Other cattle       | 30-40                                                          | 0-10                                       | 0.005                                                                                                   |                                                                                           |                                                                                                                                 |                                                                   |                                                    |                                                                                              |                                                                                                                                                        |
|                                              | Small ruminants    | 10-20                                                          | 0                                          | 0.02                                                                                                    |                                                                                           |                                                                                                                                 |                                                                   |                                                    |                                                                                              |                                                                                                                                                        |
|                                              | MIA – dairy        | 40-50                                                          | 10-20                                      | 0.02                                                                                                    | 40-50                                                                                     | 0.01                                                                                                                            | 10-20                                                             | 50-60                                              | 0.0075                                                                                       | South Africa, Sudan                                                                                                                                    |
|                                              | Other cattle       | 30-40                                                          | 10-20                                      | 0.02                                                                                                    |                                                                                           |                                                                                                                                 |                                                                   |                                                    |                                                                                              |                                                                                                                                                        |
|                                              | Small ruminants    | 0-20                                                           | 0                                          | 0.02                                                                                                    |                                                                                           |                                                                                                                                 |                                                                   |                                                    |                                                                                              |                                                                                                                                                        |
| <u>Poultry</u>                               | Smallholder (POsm) | 10-30                                                          | 0-20                                       | 0.001                                                                                                   | 50-60                                                                                     | 0.01                                                                                                                            | 10-20                                                             | 50-70                                              | 0.0075                                                                                       | Spread                                                                                                                                                 |
|                                              | Industrial (POin)  | 100                                                            | 40-50                                      | 0.001                                                                                                   | 30-40                                                                                     | 0.01                                                                                                                            | 0-20                                                              | 50-60                                              | 0.0075                                                                                       | Peri-urban and urban areas                                                                                                                             |
| <u>Pigs</u>                                  | Smallholder (PIsm) | 0-25                                                           | 0-10                                       | 0.005                                                                                                   | 30-40                                                                                     | 0.01                                                                                                                            | 10-20                                                             | 50-70                                              | 0.0075                                                                                       | Spread                                                                                                                                                 |
|                                              | Industrial (PIsm)  | 100                                                            | 30-40                                      | 0.005                                                                                                   | 40-50                                                                                     | 0.01                                                                                                                            | 0-20                                                              | 60-80                                              | 0.0075                                                                                       | Peri-urban and urban areas                                                                                                                             |

Table S 18. N<sub>2</sub>O emissions from manure management for livestock production systems in Latin America

|                                          | Stocking rates (TLU km <sup>2</sup> ) | Livestock system   | Fraction manure N managed (%) MS <sub>(T,S)</sub> | Fraction manure to other uses (%) | N <sub>2</sub> O emission factor (kg kg <sup>-1</sup> manure N excreted) EF <sub>3(S)</sub> | NH <sub>3</sub> +NO <sub>x</sub> volatilisation (fraction) Frac <sub>GasMS</sub> | N <sub>2</sub> O emission factor (kg kg <sup>-1</sup> NH <sub>3</sub> +NO <sub>x</sub> volatilised) EF <sub>4</sub> | N leached from manure (fraction) Frac <sub>leachMS</sub> | Total N loss from MMS Frac <sub>LossMS</sub> | N <sub>2</sub> O emission factor (kg kg <sup>-1</sup> N leached) EF <sub>5</sub> | Examples of systems                                                                                         |
|------------------------------------------|---------------------------------------|--------------------|---------------------------------------------------|-----------------------------------|---------------------------------------------------------------------------------------------|----------------------------------------------------------------------------------|---------------------------------------------------------------------------------------------------------------------|----------------------------------------------------------|----------------------------------------------|----------------------------------------------------------------------------------|-------------------------------------------------------------------------------------------------------------|
| <u>Rangeland-based systems</u>           |                                       | LGT – dairy        | 30-40                                             | 10-20                             | 0.02                                                                                        | 30-40                                                                            | 0.01                                                                                                                | 10-20                                                    | 40-70                                        | 0.0075                                                                           | Dairy Bogota, Colombia, Peru, Bolivia Altiplano camelid and sheep systems South Patagonia, and NW Argentina |
|                                          |                                       | Other cattle       | 20-30                                             | 0-10                              | 0.02                                                                                        |                                                                                  |                                                                                                                     |                                                          |                                              |                                                                                  |                                                                                                             |
|                                          |                                       | Small ruminants    | 0-10                                              | 0                                 | 0.02                                                                                        |                                                                                  |                                                                                                                     |                                                          |                                              |                                                                                  |                                                                                                             |
|                                          |                                       | LGH – dairy        | 20-30                                             | 10-15                             | 0.02                                                                                        | 30-40                                                                            | 0.01-0.02                                                                                                           | 10-30                                                    | 50-70                                        | 0.0075                                                                           |                                                                                                             |
|                                          |                                       | Other cattle       | 10-20                                             | 0-10                              | 0.02                                                                                        |                                                                                  |                                                                                                                     |                                                          |                                              |                                                                                  |                                                                                                             |
|                                          |                                       | Small ruminants    | 0-10                                              | 0                                 | 0.02                                                                                        |                                                                                  |                                                                                                                     |                                                          |                                              |                                                                                  |                                                                                                             |
|                                          |                                       | LGA – dairy        | 20-30                                             | 0-10                              | 0.02                                                                                        | 20-30                                                                            | 0.01                                                                                                                | <5                                                       | 50-70                                        | 0.0005                                                                           |                                                                                                             |
|                                          |                                       | Other cattle       | 10-20                                             | 0-5                               | 0.02                                                                                        |                                                                                  |                                                                                                                     |                                                          |                                              |                                                                                  |                                                                                                             |
|                                          |                                       | Small ruminants    | 0-10                                              | 0                                 | 0.02                                                                                        |                                                                                  |                                                                                                                     |                                                          |                                              |                                                                                  |                                                                                                             |
| <u>Mixed farming systems (Rainfed)</u>   |                                       | MRT – dairy        | 40-50                                             | 20-30                             | 0.005                                                                                       | 30-40                                                                            | 0-0.005                                                                                                             | 10-30                                                    | 50-70                                        | 0.0075                                                                           | Pampas, South Brazil and Uruguay                                                                            |
|                                          |                                       | Other cattle       | 30-40                                             | 10-20                             | 0.02                                                                                        |                                                                                  |                                                                                                                     |                                                          |                                              |                                                                                  |                                                                                                             |
|                                          |                                       | Small ruminants    | 10-20                                             | 0-10                              | 0.02                                                                                        |                                                                                  |                                                                                                                     |                                                          |                                              |                                                                                  |                                                                                                             |
|                                          |                                       | MRH – dairy        | 20-30                                             | 10-15                             | 0.005                                                                                       | 30-40                                                                            | 0.01-0.02                                                                                                           | 10-30                                                    | 60-70                                        | 0.0075                                                                           |                                                                                                             |
|                                          |                                       | Other cattle       | 10-20                                             | 0-10                              | 0.02                                                                                        |                                                                                  |                                                                                                                     |                                                          |                                              |                                                                                  |                                                                                                             |
|                                          |                                       | Small ruminants    | 0-10                                              | 0-10                              | 0.02                                                                                        |                                                                                  |                                                                                                                     |                                                          |                                              |                                                                                  |                                                                                                             |
|                                          |                                       | MRA – dairy        | 30-40                                             | 10-20                             | 0.02                                                                                        | 30-40                                                                            | 0.01                                                                                                                | 5-10                                                     | 50-70                                        | 0.0005                                                                           |                                                                                                             |
|                                          |                                       | Other cattle       | 20-30                                             | 0-10                              | 0.02                                                                                        |                                                                                  |                                                                                                                     |                                                          |                                              |                                                                                  |                                                                                                             |
|                                          |                                       | Small ruminants    | 10-20                                             | 0                                 | 0.02                                                                                        |                                                                                  |                                                                                                                     |                                                          |                                              |                                                                                  |                                                                                                             |
| <u>Mixed farming systems (Irrigated)</u> |                                       | MIT – dairy        | 40-50                                             | 20-30                             | 0.005                                                                                       | 40-50                                                                            | 0-0.005                                                                                                             | 20-30                                                    | 50-70                                        | 0.0075                                                                           | Central highlands in Chile and Mexico                                                                       |
|                                          |                                       | Other cattle       | 30-40                                             | 10-20                             | 0.02                                                                                        |                                                                                  |                                                                                                                     |                                                          |                                              |                                                                                  |                                                                                                             |
|                                          |                                       | Small ruminants    | 10-20                                             | 0-10                              | 0.02                                                                                        |                                                                                  |                                                                                                                     |                                                          |                                              |                                                                                  |                                                                                                             |
|                                          |                                       | MIH – dairy        | 20-30                                             | 10-15                             | 0.005                                                                                       | 30-40                                                                            | 0.01-0.02                                                                                                           | 20-30                                                    | 50-70                                        | 0.0075                                                                           |                                                                                                             |
|                                          |                                       | Other cattle       | 10-20                                             | 0-10                              | 0.02                                                                                        |                                                                                  |                                                                                                                     |                                                          |                                              |                                                                                  |                                                                                                             |
|                                          |                                       | Small ruminants    | 0-10                                              | 0-10                              | 0.02                                                                                        |                                                                                  |                                                                                                                     |                                                          |                                              |                                                                                  |                                                                                                             |
|                                          |                                       | MIA – dairy        | 30-40                                             | 10-20                             | 0.02                                                                                        | 40-50                                                                            | 0.01                                                                                                                | 10-20                                                    | 50-60                                        | 0.0005                                                                           |                                                                                                             |
|                                          |                                       | Other cattle       | 20-30                                             | 0-10                              | 0.02                                                                                        |                                                                                  |                                                                                                                     |                                                          |                                              |                                                                                  |                                                                                                             |
|                                          |                                       | Small ruminants    | 10-20                                             | 0                                 | 0.02                                                                                        |                                                                                  |                                                                                                                     |                                                          |                                              |                                                                                  |                                                                                                             |
| <u>Poultry</u>                           |                                       | Smallholder (POsm) | 0-20                                              | 20-30                             | 0.001                                                                                       | 50-60                                                                            | 0.01                                                                                                                | 10-20                                                    | 50-70                                        | 0.0005                                                                           | Spread                                                                                                      |
|                                          |                                       | Industrial (POin)  | 100                                               | 40-50                             | 0.001                                                                                       | 30-40                                                                            | 0.01                                                                                                                | 10-30                                                    | 50-60                                        | 0.0005                                                                           | Peri-urban and urban areas                                                                                  |
| <u>Pigs</u>                              |                                       | Smallholder (PIsm) | 0-25                                              | 10-20                             | 0.005                                                                                       | 30-50                                                                            | 0.01                                                                                                                | 10-20                                                    | 50-70                                        | 0.0005                                                                           | Spread                                                                                                      |
|                                          |                                       | Industrial (PIsm)  | 100                                               | 20-30                             | 0-0.005                                                                                     | 20-40                                                                            | 0.01                                                                                                                | 0-10                                                     | 60-80                                        | 0.0005                                                                           | Santa Catarina State in Brazil, central Chile, Jalisco and Michoacan in Mexico                              |

Table S 19. N<sub>2</sub>O emissions from manure management for livestock production systems in Asia

|                                          | Stocking rates (TLU km <sup>2</sup> ) | Livestock system   | Fraction manure N managed (%)<br>MS <sub>(T,S)</sub> | Fraction manure to other uses (%) | N <sub>2</sub> O emission factor (kg kg <sup>-1</sup> manure N excreted)<br>EF <sub>3(S)</sub> | NH <sub>3</sub> +NO <sub>x</sub> volatilisation (fraction)<br>Frac <sub>GasMS</sub> | N <sub>2</sub> O emission factor (kg kg <sup>-1</sup> NH <sub>3</sub> +NO <sub>x</sub> volatilised)<br>EF <sub>4</sub> | N leached from manure (fraction)<br>Frac <sub>leachMS</sub> | Total N loss from MMS<br>Frac <sub>LossMS</sub> | N <sub>2</sub> O emission factor (kg kg <sup>-1</sup> N leached)<br>EF <sub>5</sub> | Examples of systems                                                                            |
|------------------------------------------|---------------------------------------|--------------------|------------------------------------------------------|-----------------------------------|------------------------------------------------------------------------------------------------|-------------------------------------------------------------------------------------|------------------------------------------------------------------------------------------------------------------------|-------------------------------------------------------------|-------------------------------------------------|-------------------------------------------------------------------------------------|------------------------------------------------------------------------------------------------|
| <u>Rangeland-based systems</u>           |                                       | LGT – dairy        | 30-40                                                | 20-30                             | 0.02                                                                                           | 20-30                                                                               | 0.01 (0.002-0.05)                                                                                                      | 10-20                                                       | 50-70                                           | 0.0075 (0.0005-0.025)                                                               | Mongolia steppe, Kazakhstan, Uzbekistan, Turkmenistan, and large areas of central and NE China |
|                                          |                                       | Other cattle       | 20-30                                                | 10-20                             | 0.02                                                                                           |                                                                                     |                                                                                                                        |                                                             |                                                 |                                                                                     |                                                                                                |
|                                          |                                       | Small ruminants    | 10-30                                                | 0-10                              | 0.02                                                                                           |                                                                                     |                                                                                                                        |                                                             |                                                 |                                                                                     |                                                                                                |
|                                          |                                       | LGH – dairy        | 20-30                                                | 15-20                             | 0.005                                                                                          | 30-40                                                                               | 0.01                                                                                                                   | 10-30                                                       | 50-70                                           | 0.0075                                                                              | Small areas in SE Asia: Indonesia, Papua New Guinea, Myanmar, Laos                             |
|                                          |                                       | Other cattle       | 10-20                                                | 0-10                              | 0.02                                                                                           |                                                                                     |                                                                                                                        |                                                             |                                                 |                                                                                     |                                                                                                |
|                                          |                                       | Small ruminants    | 0-10                                                 | 0                                 | 0.02                                                                                           |                                                                                     |                                                                                                                        |                                                             |                                                 |                                                                                     |                                                                                                |
|                                          |                                       | LGA – dairy        | 10-20                                                | 10-20                             | 0.02                                                                                           | 20-30                                                                               | 0.01                                                                                                                   | <5                                                          | 50-70                                           | 0.0075                                                                              | Central W China, Afghanistan, Iran, Pakistan, Saudi Arabia, Yemen                              |
|                                          |                                       | Other cattle       | 10-20                                                | 0-10                              | 0.02                                                                                           |                                                                                     |                                                                                                                        |                                                             |                                                 |                                                                                     |                                                                                                |
|                                          |                                       | Small ruminants    | 0-10                                                 | 0                                 | 0.02                                                                                           |                                                                                     |                                                                                                                        |                                                             |                                                 |                                                                                     |                                                                                                |
| <u>Mixed farming systems (Rainfed)</u>   |                                       | MRT – dairy        | 60-70                                                | 20-30                             | 0.005                                                                                          | 30-40                                                                               | 0.01                                                                                                                   | 10-30                                                       | 40-70                                           | 0.0075                                                                              | N Kazakhstan, north and central E China, Turkey                                                |
|                                          |                                       | Other cattle       | 40-50                                                | 10-20                             | 0.005                                                                                          |                                                                                     |                                                                                                                        |                                                             |                                                 |                                                                                     |                                                                                                |
|                                          |                                       | Small ruminants    | 20-30                                                | 0-10                              | 0.005                                                                                          |                                                                                     |                                                                                                                        |                                                             |                                                 |                                                                                     |                                                                                                |
|                                          |                                       | MRH – dairy        | 30-40                                                | 20-40                             | 0.005                                                                                          | 30-40                                                                               | 0.01-0.02                                                                                                              | 10-20                                                       | 50-70                                           | 0.0075                                                                              | SE China, SE Asia (Indonesia, Thailand, Philippines, Myanmar, Vietnam)                         |
|                                          |                                       | Other cattle       | 20-30                                                | 10-20                             | 0.005                                                                                          |                                                                                     |                                                                                                                        |                                                             |                                                 |                                                                                     |                                                                                                |
|                                          |                                       | Small ruminants    | 10-20                                                | 0                                 | 0.02                                                                                           |                                                                                     |                                                                                                                        |                                                             |                                                 |                                                                                     |                                                                                                |
|                                          |                                       | MRA – dairy        | 50-60                                                | 20-40                             | 0.02                                                                                           | 20-30                                                                               | 0.01                                                                                                                   | 5-10                                                        | 50-70                                           | 0.0075                                                                              | India and Pakistan, Afghanistan, Iran, and most Turkey                                         |
|                                          |                                       | Other cattle       | 30-40                                                | 10-20                             | 0.02                                                                                           |                                                                                     |                                                                                                                        |                                                             |                                                 |                                                                                     |                                                                                                |
|                                          |                                       | Small ruminants    | 10-20                                                | 0-10                              | 0.02                                                                                           |                                                                                     |                                                                                                                        |                                                             |                                                 |                                                                                     |                                                                                                |
| <u>Mixed farming systems (Irrigated)</u> |                                       | MIT – dairy        | 60-70                                                | 20-30                             | 0.005                                                                                          | 30-40                                                                               | 0.01                                                                                                                   | 20-30                                                       | 40-70                                           | 0.0075                                                                              | East China, Far East Asia irrigated rice/dairy systems                                         |
|                                          |                                       | Other cattle       | 40-50                                                | 10-20                             | 0.005                                                                                          |                                                                                     |                                                                                                                        |                                                             |                                                 |                                                                                     |                                                                                                |
|                                          |                                       | Small ruminants    | 20-30                                                | 0-10                              | 0.005                                                                                          |                                                                                     |                                                                                                                        |                                                             |                                                 |                                                                                     |                                                                                                |
|                                          |                                       | MIH – dairy        | 30-40                                                | 20-40                             | 0.005                                                                                          | 30-40                                                                               | 0.01-0.02                                                                                                              | 10-20                                                       | 40-60                                           | 0.0075                                                                              | Rice-buffalo systems Philippines, Vietnam and India                                            |
|                                          |                                       | Other cattle       | 20-30                                                | 10-20                             | 0.005                                                                                          |                                                                                     |                                                                                                                        |                                                             |                                                 |                                                                                     |                                                                                                |
|                                          |                                       | Small ruminants    | 10-20                                                | 0                                 | 0.02                                                                                           |                                                                                     |                                                                                                                        |                                                             |                                                 |                                                                                     |                                                                                                |
|                                          |                                       | MIA – dairy        | 50-60                                                | 20-40                             | 0.02                                                                                           | 20-30                                                                               | 0.01                                                                                                                   | 10-20                                                       | 50-70                                           | 0.0075                                                                              | Mainly buffalo production systems from India and Pakistan,                                     |
|                                          |                                       | Other cattle       | 30-40                                                | 10-20                             | 0.02                                                                                           |                                                                                     |                                                                                                                        |                                                             |                                                 |                                                                                     |                                                                                                |
|                                          |                                       | Small ruminants    | 10-20                                                | 0-10                              | 0.02                                                                                           |                                                                                     |                                                                                                                        |                                                             |                                                 |                                                                                     |                                                                                                |
| <u>Poultry</u>                           |                                       | Smallholder (POsm) | 30-40                                                | 20-30                             | 0.001                                                                                          | 50-60                                                                               | 0.01                                                                                                                   | 10-20                                                       | 50-70                                           | 0.0075                                                                              |                                                                                                |
|                                          |                                       | Industrial (POin)  | 100                                                  | 40-50                             | 0.001                                                                                          | 30-40                                                                               | 0.01-0.02                                                                                                              | 0-10                                                        | 50-60                                           | 0.0075                                                                              |                                                                                                |
| <u>Pigs</u>                              |                                       | Smallholder (PIsm) | 50-60                                                | 30-40                             | 0.005                                                                                          | 20-30                                                                               | 0.01                                                                                                                   | 10-20                                                       | 50-60                                           | 0.0075                                                                              |                                                                                                |
|                                          |                                       | Industrial (PIsm)  | 100                                                  | 50-60                             | 0-0.005                                                                                        | 30-40                                                                               | 0.01-0.02                                                                                                              | 0-10                                                        | 40-70                                           | 0.0075                                                                              |                                                                                                |

Table S 20. N<sub>2</sub>O emissions from manure management for livestock production systems in Europe

|                                                                                                                                                                                                                              | Stocking rates (TLU km <sup>2</sup> ) | Livestock system   | Fraction manure N managed (%) | Fraction manure to other uses (%) | N <sub>2</sub> O emission factor (kg kg <sup>-1</sup> manure N excreted) | NH <sub>3</sub> +NO <sub>x</sub> volatilisation (fraction) | N <sub>2</sub> O emission factor (kg kg <sup>-1</sup> NH <sub>3</sub> +NO <sub>x</sub> volatilised) | N leached from manure (fraction) | Total N loss from MMS  | N <sub>2</sub> O emission factor (kg kg <sup>-1</sup> N leached) | Examples of systems                                                                      |
|------------------------------------------------------------------------------------------------------------------------------------------------------------------------------------------------------------------------------|---------------------------------------|--------------------|-------------------------------|-----------------------------------|--------------------------------------------------------------------------|------------------------------------------------------------|-----------------------------------------------------------------------------------------------------|----------------------------------|------------------------|------------------------------------------------------------------|------------------------------------------------------------------------------------------|
|                                                                                                                                                                                                                              |                                       |                    | MS <sub>(T,S)</sub>           |                                   | EF <sub>3(S)</sub>                                                       | Frac <sub>GasMS</sub>                                      | EF <sub>4</sub>                                                                                     | Frac <sub>leachMS</sub>          | Frac <sub>LossMS</sub> | EF <sub>5</sub>                                                  |                                                                                          |
| <u>Rangeland-based systems</u><br>Livestock only: More than 90% of the feed comes from rangelands, pastures, annual forages and purchased feeds and less than 10% from crops.                                                |                                       | LGT – dairy        | 50-60                         | 0-10                              | 0.005                                                                    | 15-20                                                      | 0.01 (0.002-0.05)                                                                                   | 10-15                            | 30-40                  | 0.0075 (0.0005-0.025)                                            | Northern UK, Ireland, Scandinavia                                                        |
|                                                                                                                                                                                                                              |                                       | Other cattle       | 40-50                         | 0-10                              | 0.005                                                                    |                                                            |                                                                                                     |                                  |                        |                                                                  |                                                                                          |
|                                                                                                                                                                                                                              |                                       | Small ruminants    | 0-20                          | 0                                 | 0.02                                                                     |                                                            |                                                                                                     |                                  |                        |                                                                  |                                                                                          |
|                                                                                                                                                                                                                              |                                       | LGH – dairy        | 50-60                         | 0-10                              | 0.005                                                                    | 20-30                                                      | 0.01                                                                                                | 10                               | 30-40                  | 0.0075                                                           | Small areas in Ireland and France                                                        |
|                                                                                                                                                                                                                              |                                       | Other cattle       | 40-50                         | 0-10                              | 0.005                                                                    |                                                            |                                                                                                     |                                  |                        |                                                                  |                                                                                          |
|                                                                                                                                                                                                                              |                                       | Small ruminants    | 10-20                         | 0                                 | 0.02                                                                     |                                                            |                                                                                                     |                                  |                        |                                                                  |                                                                                          |
|                                                                                                                                                                                                                              |                                       | LGA – dairy        | 20-30                         | 0-5                               | 0.02                                                                     | 15-20                                                      | 0.01                                                                                                | 0-5                              | 40-50                  | 0.0075                                                           | Small areas Greece and Cyprus                                                            |
|                                                                                                                                                                                                                              |                                       | Other cattle       | 10-20                         | 0-5                               | 0.02                                                                     |                                                            |                                                                                                     |                                  |                        |                                                                  |                                                                                          |
|                                                                                                                                                                                                                              |                                       | Small ruminants    | 0-10                          | 0                                 | 0.02                                                                     |                                                            |                                                                                                     |                                  |                        |                                                                  |                                                                                          |
| <u>Mixed farming systems</u><br>(Rainfed)<br>More than 10% of feed comes from crop by-products or more than 10% percent of the total value of production comes from non-livestock farming activities.                        |                                       | MRT – dairy        | 60-70                         | 10-20                             | 0.005                                                                    | 20-25                                                      | 0.01                                                                                                | 10-15                            | 40-50                  | 0.0075                                                           | Spread all over East and northern Europe                                                 |
|                                                                                                                                                                                                                              |                                       | Other cattle       | 40-50                         | 0-20                              | 0.005                                                                    |                                                            |                                                                                                     |                                  |                        |                                                                  |                                                                                          |
|                                                                                                                                                                                                                              |                                       | Small ruminants    | 10-20                         | 0-10                              | 0.02                                                                     |                                                            |                                                                                                     |                                  |                        |                                                                  |                                                                                          |
|                                                                                                                                                                                                                              |                                       | MRH – dairy        | 50-60                         | 5-10                              | 0.005                                                                    | 15-20                                                      | 0.01-0.02                                                                                           | 10                               | 30-40                  | 0.0075                                                           | Small areas in NW France, and in Central Italy                                           |
|                                                                                                                                                                                                                              |                                       | Other cattle       | 30-40                         | 0-10                              | 0.005                                                                    |                                                            |                                                                                                     |                                  |                        |                                                                  |                                                                                          |
|                                                                                                                                                                                                                              |                                       | Small ruminants    | 0-10                          | 0-10                              | 0.02                                                                     |                                                            |                                                                                                     |                                  |                        |                                                                  |                                                                                          |
|                                                                                                                                                                                                                              | MRA – dairy                           | 40-50              | 0-5                           | 0.005                             | 15-20                                                                    | 0.01                                                       | 0-5                                                                                                 | 40-50                            | 0.0075                 | Spain, Italy, Portugal, Greece                                   |                                                                                          |
|                                                                                                                                                                                                                              | Other cattle                          | 30-40              | 0-5                           | 0.02                              |                                                                          |                                                            |                                                                                                     |                                  |                        |                                                                  |                                                                                          |
|                                                                                                                                                                                                                              | Small ruminants                       | 0-10               | 0                             | 0.02                              |                                                                          |                                                            |                                                                                                     |                                  |                        |                                                                  |                                                                                          |
| <u>Mixed farming systems</u><br>(Irrigated)<br>These are similar to the previous systems, but more than 10% of the value of non-livestock farm produce comes from irrigated land use. These systems are very rare in Africa. |                                       | MIT – dairy        | 60-70                         | 10-20                             | 0.005                                                                    | 25-30                                                      | 0.01                                                                                                | 10-15                            | 40-50                  | 0.0075                                                           | Mainly in the Netherlands and Denmark but also some areas in Italy, Hungary and Bulgaria |
|                                                                                                                                                                                                                              |                                       | Other cattle       | 40-50                         | 0-20                              | 0.005                                                                    |                                                            |                                                                                                     |                                  |                        |                                                                  |                                                                                          |
|                                                                                                                                                                                                                              |                                       | Small ruminants    | 10-20                         | 0-10                              | 0.02                                                                     |                                                            |                                                                                                     |                                  |                        |                                                                  |                                                                                          |
|                                                                                                                                                                                                                              |                                       | MIH – dairy        | 50-60                         | 5-10                              | 0.005                                                                    | 20-25                                                      | 0.01-0.02                                                                                           | 10                               | 30-40                  | 0.0075                                                           | Small areas in Portugal, Spain and France                                                |
|                                                                                                                                                                                                                              |                                       | Other cattle       | 30-40                         | 0-10                              | 0.005                                                                    |                                                            |                                                                                                     |                                  |                        |                                                                  |                                                                                          |
|                                                                                                                                                                                                                              |                                       | Small ruminants    | 0-10                          | 0-10                              | 0.02                                                                     |                                                            |                                                                                                     |                                  |                        |                                                                  |                                                                                          |
|                                                                                                                                                                                                                              |                                       | MIA – dairy        | 40-50                         | 0-5                               | 0.005                                                                    | 15-20                                                      | 0.01                                                                                                | 5-10                             | 40-50                  | 0.0075                                                           | Small areas in Spain, Italy, Portugal, Greece, Cyprus,                                   |
|                                                                                                                                                                                                                              |                                       | Other cattle       | 30-40                         | 0-5                               | 0.02                                                                     |                                                            |                                                                                                     |                                  |                        |                                                                  |                                                                                          |
|                                                                                                                                                                                                                              |                                       | Small ruminants    | 0-10                          | 0                                 | 0.02                                                                     |                                                            |                                                                                                     |                                  |                        |                                                                  |                                                                                          |
| <u>Poultry</u>                                                                                                                                                                                                               |                                       | Smallholder (POsm) | 60-70                         | 20-30                             | 0.001                                                                    | 40-50                                                      | 0.01                                                                                                | 0-20                             | 40-50                  | 0.0075                                                           |                                                                                          |
|                                                                                                                                                                                                                              |                                       | Industrial (POin)  | 100                           | 30-40                             | 0.001                                                                    | 20-30                                                      | 0.01                                                                                                | 0-10                             | 30-40                  | 0.0075                                                           |                                                                                          |
| <u>Pigs</u>                                                                                                                                                                                                                  |                                       | Smallholder (PIsm) | 60-70                         | 30-40                             | 0.005                                                                    | 40-50                                                      | 0.01                                                                                                | 10-20                            | 40-50                  | 0.0075                                                           |                                                                                          |
|                                                                                                                                                                                                                              |                                       | Industrial (PIsm)  | 100                           | 30-40                             | 0-0.001                                                                  | 15-30                                                      | 0.01                                                                                                | 0-10                             | 30-40                  | 0.0075                                                           |                                                                                          |

Table S 21. N<sub>2</sub>O emissions from manure management for livestock production systems in North America

|                                          | Liv population (%) | Area (%) | Livestock system   | Fraction manure N managed (%) | Fraction manure to other uses (%) | N <sub>2</sub> O emission factor (kg kg <sup>-1</sup> manure N excreted) | NH <sub>3</sub> +NO <sub>x</sub> volatilisation (fraction) | N <sub>2</sub> O emission factor (kg kg <sup>-1</sup> NH <sub>3</sub> +NO <sub>x</sub> volatilised) | N leached from manure (fraction) | Total N loss from MMS  | N <sub>2</sub> O emission factor (kg kg <sup>-1</sup> N leached) | Examples of systems                                                                                                                           |
|------------------------------------------|--------------------|----------|--------------------|-------------------------------|-----------------------------------|--------------------------------------------------------------------------|------------------------------------------------------------|-----------------------------------------------------------------------------------------------------|----------------------------------|------------------------|------------------------------------------------------------------|-----------------------------------------------------------------------------------------------------------------------------------------------|
|                                          |                    |          |                    | MS <sub>(T,S)</sub>           |                                   | EF <sub>3(S)</sub>                                                       | Frac <sub>GasMS</sub>                                      | EF <sub>4</sub>                                                                                     | Frac <sub>leachMS</sub>          | Frac <sub>LossMS</sub> | EF <sub>5</sub>                                                  |                                                                                                                                               |
| <u>Rangeland-based systems</u>           | 9.5                | 17.9     | LGT – dairy        | 40-50                         | 0-10                              | 0.005                                                                    | 15-20                                                      | 0.01 (0.002-0.05)                                                                                   | 10-15                            | 40-50                  | 0.0075 (0.0005-0.025)                                            | Most of Alaska, Montana, Kansas, Nebraska and South Dakota. In Canada: Nunavut, NW territories and Yukon territory, British Columbia, Alberta |
|                                          |                    |          | Other cattle       | 30-40                         | 0-5                               | 0.02                                                                     |                                                            |                                                                                                     |                                  |                        |                                                                  |                                                                                                                                               |
|                                          |                    |          | Small ruminants    | 0-20                          | 0                                 | 0.02                                                                     |                                                            |                                                                                                     |                                  |                        |                                                                  |                                                                                                                                               |
|                                          | 3.4                | 1.5      | LGH – dairy        | 30-40                         | 0-5                               | 0.005                                                                    | 20-30                                                      | 0.01-0.02                                                                                           | 10                               | 30-40                  | 0.0075                                                           | Small areas in Texas, Florida and Oklahoma                                                                                                    |
|                                          |                    |          | Other cattle       | 10-20                         | 0-5                               | 0.005                                                                    |                                                            |                                                                                                     |                                  |                        |                                                                  |                                                                                                                                               |
|                                          |                    |          | Small ruminants    | 0-10                          | 0                                 | 0.02                                                                     |                                                            |                                                                                                     |                                  |                        |                                                                  |                                                                                                                                               |
|                                          | 12.6               | 17.7     | LGA – dairy        | 20-30                         | 0-5                               | 0.02                                                                     | 15-20                                                      | 0.01                                                                                                | 0-5                              | 50-60                  | 0.0075                                                           | Arizona, Nevada, New Mexico, Texas, Utah, Colorado and California                                                                             |
|                                          |                    |          | Other cattle       | 10-20                         | 0-5                               | 0.02                                                                     |                                                            |                                                                                                     |                                  |                        |                                                                  |                                                                                                                                               |
|                                          |                    |          | Small ruminants    | 0-10                          | 0                                 | 0.02                                                                     |                                                            |                                                                                                     |                                  |                        |                                                                  |                                                                                                                                               |
| <u>Mixed farming systems (Rainfed)</u>   | 18.1               | 10.7     | MRT – dairy        | 40-50                         | 10-20                             | 0.005                                                                    | 20-25                                                      | 0.01                                                                                                | 10-15                            | 40-50                  | 0.0075                                                           | Illinois, Iowa, Minnesota, North Dakota<br>In Canada: Saskatchewan, Prince Edward Island, Alberta, Manitoba                                   |
|                                          |                    |          | Other cattle       | 30-40                         | 0-10                              | 0.02                                                                     |                                                            |                                                                                                     |                                  |                        |                                                                  |                                                                                                                                               |
|                                          |                    |          | Small ruminants    | 0-20                          | 0-5                               | 0.02                                                                     |                                                            |                                                                                                     |                                  |                        |                                                                  |                                                                                                                                               |
|                                          | 2.5                | 1.7      | MRH – dairy        | 30-40                         | 5-10                              | 0.005                                                                    | 15-20                                                      | 0.01-0.02                                                                                           | 10                               | 40-60                  | 0.0075                                                           | North Carolina, South Carolina, Alabama, Florida and Georgia                                                                                  |
|                                          |                    |          | Other cattle       | 10-20                         | 0-5                               | 0.02                                                                     |                                                            |                                                                                                     |                                  |                        |                                                                  |                                                                                                                                               |
|                                          |                    |          | Small ruminants    | 0-10                          | 0                                 | 0.02                                                                     |                                                            |                                                                                                     |                                  |                        |                                                                  |                                                                                                                                               |
|                                          | <0.1               | <0.1     | MRA – dairy        | 30-40                         | 0-10                              | 0.02                                                                     | 15-20                                                      | 0.01                                                                                                | 0-5                              | 50-60                  | 0.0075                                                           | Small areas in Colorado, Oklahoma, Montana                                                                                                    |
|                                          |                    |          | Other cattle       | 20-30                         | 0-10                              | 0.02                                                                     |                                                            |                                                                                                     |                                  |                        |                                                                  |                                                                                                                                               |
|                                          |                    |          | Small ruminants    | 0-10                          | 0                                 | 0.02                                                                     |                                                            |                                                                                                     |                                  |                        |                                                                  |                                                                                                                                               |
| <u>Mixed farming systems (Irrigated)</u> | 5.6                | 2.9      | MIT – dairy        | 40-50                         | 10-20                             | 0.005                                                                    | 25-30                                                      | 0.01                                                                                                | 10-15                            | 40-50                  | 0.0075                                                           | Nebraska, Arkansas, Idaho                                                                                                                     |
|                                          |                    |          | Other cattle       | 30-40                         | 0-10                              | 0.02                                                                     |                                                            |                                                                                                     |                                  |                        |                                                                  |                                                                                                                                               |
|                                          |                    |          | Small ruminants    | 0-20                          | 0-5                               | 0.02                                                                     |                                                            |                                                                                                     |                                  |                        |                                                                  |                                                                                                                                               |
|                                          | 1                  | 0.9      | MIH – dairy        | 30-40                         | 5-10                              | 0.005                                                                    | 20-25                                                      | 0.01-0.02                                                                                           | 10                               | 40-60                  | 0.0075                                                           | Small areas in Florida, Georgia, Louisiana, and Mississippi                                                                                   |
|                                          |                    |          | Other cattle       | 10-20                         | 0-5                               | 0.02                                                                     |                                                            |                                                                                                     |                                  |                        |                                                                  |                                                                                                                                               |
|                                          |                    |          | Small ruminants    | 0-10                          | 0                                 | 0.02                                                                     |                                                            |                                                                                                     |                                  |                        |                                                                  |                                                                                                                                               |
|                                          | 7.4                | 2.9      | MIA – dairy        | 30-40                         | 0-10                              | 0.02                                                                     | 15-20                                                      | 0.01                                                                                                | 0-5                              | 50-60                  | 0.0075                                                           | Texas, California, Colorado                                                                                                                   |
|                                          |                    |          | Other cattle       | 20-30                         | 0-10                              | 0.02                                                                     |                                                            |                                                                                                     |                                  |                        |                                                                  |                                                                                                                                               |
|                                          |                    |          | Small ruminants    | 0-10                          | 0                                 | 0.02                                                                     |                                                            |                                                                                                     |                                  |                        |                                                                  |                                                                                                                                               |
| <u>Poultry</u>                           |                    |          | Smallholder (POsm) | 40-50                         | 20-30                             | 0.001                                                                    | 40-50                                                      | 0.01                                                                                                | 10-20                            | 40-50                  | 0.0075                                                           | Rhode Island, New Jersey, Massachusetts, Connecticut, Delaware                                                                                |
|                                          |                    |          | Industrial (POin)  | 100                           | 30-40                             | 0.001                                                                    | 20-30                                                      | 0.01                                                                                                | 10-20                            | 30-40                  | 0.0075                                                           |                                                                                                                                               |
| <u>Pigs</u>                              |                    |          | Smallholder (PIsm) | 30-40                         | 20-30                             | 0.005                                                                    | 40-50                                                      | 0.01                                                                                                | 10-20                            | 40-50                  | 0.0075                                                           |                                                                                                                                               |
|                                          |                    |          | Industrial (PIsm)  | 100                           | 20-30                             | 0.005-0.01                                                               | 20-40                                                      | 0.01                                                                                                | 0-10                             | 30-40                  | 0.0075                                                           | Spread across states in the NE and E of US.<br>Most Canada (59%) largely classified as 'other'                                                |

Table S 22. Manure management for dairy systems across livestock systems and regions

|                                          |     | Africa                      | Latin America               | Asia                        | Europe                                              | North America                                      |
|------------------------------------------|-----|-----------------------------|-----------------------------|-----------------------------|-----------------------------------------------------|----------------------------------------------------|
| <u>Rangeland-based systems</u>           | LGT | Range/dry lot               | Range/dry lot               | Range/dry lot               | Semi-confined/solid storage (2/3) and slurry (1/3)  | Semi-confined/solid storage                        |
|                                          | LGH | Range/dry lot               | Range/dry lot               | Range/solid storage         | Semi-confined/solid storage (2/3) and slurry (1/3)  | Semi-confined/solid storage                        |
|                                          | LGA | Range/dry lot               | Range/dry lot               | Range/dry lot               | Range/dry lot                                       | Range/dry lot                                      |
| <u>Mixed farming systems (Rainfed)</u>   | MRT | Semi-confined/solid storage | Semi-confined/solid storage | Semi-confined/solid storage | Semi-confined/ slurry (2/3) and solid storage (1/3) | Semi-confined/solid storage (2/3) and slurry (1/3) |
|                                          | MRH | Semi-confined/solid storage | Semi-confined/solid storage | Semi-confined/solid storage | Semi-confined/slurry (2/3) and solid storage (1/3)  | Semi-confined/solid storage (2/3) and slurry (1/3) |
|                                          | MRA | Range/dry lot               | Semi-confined/dry lot       | Semi-confined/dry lot       | Semi-confined/solid storage                         | Semi-confined/dry lot                              |
| <u>Mixed farming systems (Irrigated)</u> | MIT | Semi-confined/solid storage | Semi-confined/dry lot       | Semi-confined/solid storage | Semi-confined/ slurry (2/3) and solid storage (1/3) | Semi-confined/solid storage (2/3) and slurry (1/3) |
|                                          | MIH | Semi-confined/solid storage | Semi-confined/dry lot       | Semi-confined/solid storage | Semi-confined/slurry (2/3) and solid storage (1/3)  | Semi-confined/solid storage (2/3) and slurry (1/3) |
|                                          | MIA | Range/dry lot               | Semi-confined/dry lot       | Semi-confined/dry lot       | Semi-confined/ solid storage                        | Semi-confined/dry lot                              |

Table S 23. Manure management for other cattle across livestock systems and regions

|                                          |     | Africa                      | Latin America         | Asia                        | Europe                                            | North America         |
|------------------------------------------|-----|-----------------------------|-----------------------|-----------------------------|---------------------------------------------------|-----------------------|
| <u>Rangeland-based systems</u>           | LGT | Range/dry lot               | Range/dry lot         | Range/dry lot               | Semi-confined/solid storage                       | Semi-confined/dry lot |
|                                          | LGH | Range/dry lot               | Range/dry lot         | Range/dry lot               | Semi-confined/solid storage                       | Range/dry lot         |
|                                          | LGA | Range/dry lot               | Range/dry lot         | Range/dry lot               | Range/dry lot                                     | Range/dry lot         |
| <u>Mixed farming systems (Rainfed)</u>   | MRT | Range/solid storage         | Range/dry lot         | Semi-confined/solid storage | Semi-confined/slurry (1/3) and solid storage(2/3) | Semi-confined/dry lot |
|                                          | MRH | Semi-confined/solid storage | Semi-confined/dry lot | Semi-confined/solid storage | Semi-confined/slurry (1/3) and solid storage(2/3) | Range/dry lot         |
|                                          | MRA | Range/dry lot               | Semi-confined/dry lot | Semi-confined/dry lot       | Range/dry lot                                     | Range/dry lot         |
| <u>Mixed farming systems (Irrigated)</u> | MIT | Semi-confined/solid storage | Semi-confined/dry lot | Semi-confined/solid storage | Semi-confined/slurry (1/3) and solid storage(2/3) | Semi-confined/dry lot |
|                                          | MIH | Semi-confined/solid storage | Semi-confined/dry lot | Semi-confined/solid storage | Semi-confined/slurry (1/3) and solid storage(2/3) | Range/dry lot         |
|                                          | MIA | Range/dry lot               | Semi-confined/dry lot | Semi-confined/dry lot       | Range/dry lot                                     | Range/dry lot         |



Table S 24. Manure management for small ruminants across livestock systems and regions

|                                          |     | Africa        | Latin America | Asia                  | Europe                | North America |
|------------------------------------------|-----|---------------|---------------|-----------------------|-----------------------|---------------|
| <u>Rangeland-based systems</u>           | LGT | Range/dry lot | Range/dry lot | Range/dry lot         | Range/dry lot         | Range/dry lot |
|                                          | LGH | Range/dry lot | Range/dry lot | Range/dry lot         | Range/dry lot         | Range/dry lot |
|                                          | LGA | Range         | Range         | Range                 | Range                 | Range         |
| <u>Mixed farming systems (Rainfed)</u>   | MRT | Range/dry lot | Range/dry lot | Semi-confined/dry lot | Semi-confined/dry lot | Range/dry lot |
|                                          | MRH | Range/dry lot | Range/dry lot | Semi-confined/dry lot | Range/dry lot         | Range/dry lot |
|                                          | MRA | Range/dry lot | Range/dry lot | Range/dry lot         | Range/dry lot         | Range/dry lot |
| <u>Mixed farming systems (Irrigated)</u> | MIT | Range/dry lot | Range/dry lot | Range/dry lot         | Range/dry lot         | Range/dry lot |
|                                          | MIH | Range/dry lot | Range/dry lot | Range/dry lot         | Range/dry lot         | Range/dry lot |
|                                          | MIA | Range/dry lot | Range/dry lot | Range/dry lot         | Range/dry lot         | Range/dry lot |

Table S 25. Manure management for pigs and poultry across livestock systems and regions

|                |                  | Africa                    | Latin America                      | Asia                               | Europe                 | North America          |
|----------------|------------------|---------------------------|------------------------------------|------------------------------------|------------------------|------------------------|
| <u>Poultry</u> | PoS <sub>m</sub> | Free range/without litter | Free range/without litter          | Free range/without litter          | Free range/with litter | Free range/with litter |
|                | Pol <sub>n</sub> | Confined/with litter      | Confined/with litter               | Confined/with litter               | Confined/with litter   | Confined/with litter   |
| <u>Pigs</u>    | PiS <sub>m</sub> | Scavenging/solid storage  | Free range/solid storage           | Scavenging/solid storage           | Confined/deep bedding  | Confined/deep bedding  |
|                | PiI <sub>n</sub> | Confined/solid storage    | Confined/lagoons and solid storage | Confined/lagoons and solid storage | Confined/lagoons       | Confined/lagoons       |

## **9. Estimation of N<sub>2</sub>O direct emissions from managed soils**

### **a. Direct N<sub>2</sub>O emissions from managed soils**

We followed the method of IPCC (123) to estimate the direct emissions N<sub>2</sub>O from managed soils, for each livestock system. We estimated direct emissions using equation 11.1, and literature to select emission coefficients. Addition of manures to soil ( $F_{AM}$ ) was calculated using the fraction of manure managed (MS), manure destined to other uses (MSO), and subtracting total manure N losses ( $Frac_{LossMS}$ ). IPCC (123) recommends the use of one emission factor for N inputs ( $EF_1$ ) for direct emissions, and two emission factors for direct deposition of manure on grazing land ( $EF_{3PRP}$ ), one for cattle pigs and poultry and one for sheep and other livestock. The selection of  $EF_1$  across systems was based on main characteristics of the dominant soils at each of the systems, and supported on the work of (266-268). The emission coefficients for direct depositions ( $EF_{3PRP}$ ) were taken from (269).

### **b. Indirect N<sub>2</sub>O emissions from managed soils**

Calculating N<sub>2</sub>O losses from atmospheric deposition (equation 11.9) requires defining  $Frac_{GASF}$  and  $Frac_{GASM}$ , the fractions of applied fertiliser and applied manure which is lost through volatilisation, and a emission factor ( $EF_4$ ), which is applied to the total N lost through volatilization. We used default IPCC values for both  $Frac_{GASF}$  and  $Frac_{GASM}$ , following (270). For  $EF_4$ , we took the recommended values by (271).

## References

1. Sere C, Steinfeld H, & Groenewold J (1995) World livestock production systems: Current status, issues and trends. *Consultation on Global Agenda for Livestock Research, Nairobi (Kenya), 18-20 Jan 1995*, (ILRI).
2. Robinson T, *et al.* (2011) *Global livestock production systems* (Food and Agriculture Organization of the United Nations (FAO)).
3. JRC (2005) GLC 2000 (Global Land Cover) data layer. ed Joint Research Centre I, Italy.
4. CIESIN (2005) Gridded Population of the World (GPW) v3, Beta-release. (Center for International Earth Science Information Network (CIESIN), Earth Institute, Columbia University).
5. Siebert S, Döll P, Feick S, Hoogeveen J, & Frenken K (2007) Global map of irrigated areas Version 4.0.1. (Johann Wolfgang Goethe University, Frankfurt am Main, and Food and Agriculture Organization of the United Nations).
6. Hijmans RJ, Cameron SE, Parra JL, Jones PG, & Jarvis A (2005) Very high resolution interpolated climate surfaces for global land areas. *International Journal of Climatology* 25(15):1965-1978.
7. Jones P & Thornton P (2010) Global high-resolution LGP dataset. (International Livestock Research Institute, Nairobi, Kenya).
8. Wint W & Robinson T (2007) *Gridded livestock of the world 2007* (FAO).
9. Rosset P (2000) The multiple functions and benefits of small farm agriculture in the context of global trade negotiations. *Development* 43(2):77-82.
10. Nagayets O (2005) Small farms: current status and key trends. in *The future of small farms*, pp 355-367.
11. Grace D, Jost C, Macgregor-Skinner G, & Mariner J (2009) Participation of small farmers in animal health programmes. *76th General Session of the OIE International Committee, Paris, France, 25-30 May, 2008.*, (OIE (World Organisation for Animal Health)), pp 1-70.
12. Lekule FP & Kyvsgaard NC (2003) Improving pig husbandry in tropical resource-poor communities and its potential to reduce risk of porcine cysticercosis. *Acta Tropica* 87(1):111-117.
13. Thorpe W & Jemaneh T (2008) *Pig systems in Asia and the Pacific: how can research and development enhance benefits to the poor?* (ILRI (aka ILCA and ILRAD)).
14. Schneider M (2011) Feeding China's pigs: Implications for the environment, China's smallholder farmers and food security. *Institute for Agriculture and Trade Policy (IATP), May*.
15. La V, Le T, Do V, & Nguyen V (2002) Pig Production in Southeast Asia & the Pacific to 2002. (Canberra: Australian Centre for International Agricultural Research), pp 57-70.
16. Huynh T, Aarnink A, Drucker A, & Verstegen M (2007) Pig production in Cambodia, Laos, Philippines, and Vietnam: a review. *Asian Journal of Agriculture and Development* 4(1):69-90.
17. Thorne P (2005) Pig raising in northern Lao PDR. (Working paper).
18. Epprecht M (2005) Geographic Dimensions of Livestock Holdings in Vietnam-Spatial Relationships among Poverty, Infrastructure and the Environment. (Food and Agriculture Organization of the United Nations, Pro-Poor Livestock Policy Initiative).
19. Tisdell CA (2009) Trends in Vietnam's pork supply and structural features of its pig sector. *The Open Area Studies Journal* 2:52-71.
20. Deka R, Grace D, Lapar L, & Mehta-Bhatt P (2012) Sharing Lessons between Pig System of South Asia and Southeast Asia: A Review. in *Managing Risks in Emerging Pork Markets: An International South-South Symposium* (Hanoi, Vietnam).

21. Cameron R (2000) A Review of the industrialization of pig production worldwide with particular reference to the Asian region. *Animal Health and Area-wide Integration*. FAO, Brisbane, Australia.
22. FAO (1998) Farm Animal Genetic Resources: Biodiversity for food and agriculture. (Food and Agriculture Organisation of the United Nations (FAO)).
23. FAO (1998) Local animal breeds still threatened by extinction. (Food and Agriculture Organisation of the United Nations (FAO)).
24. ILRI (2013) Value chain assessment and best interventions identification - Workshop report. in *Smallholder Pig Value Chains Development in Uganda (SPVCD) Project* (International Livestock Research Institute (ILRI)).
25. FAO (2012) Pig sector reviews at national level. Kenya, Burkina Faso and DR Congo. in *Pig sector reviews at national level* (Food and Agricultural Organisation of the United Nations (FAO)).
26. Kagira JM, Kanyari PW, Maingi N, Githigia SM, & Karuga JW (2010) Characteristics of the smallholder free-range pig production system in western Kenya. *Tropical animal health and production* 42(5):865-873.
27. NaRanong V (2007) Structural changes in Thailand's poultry sector and its social implications. (Thailand Development Research Institute. Bangkok, Thailand).
28. Burgos S, Hong Hanh PT, Roland-Holst D, & Burgos SA (2007) Characterization of poultry production systems in Vietnam. *International Journal of Poultry Science* 6(10):709-712.
29. Bingsheng K (2002) Perspectives and strategies for the livestock sector in China over the next three decades. (Livestock Policy Discussion Paper).
30. Poapongsakorn N (2012) Asian Livestock: Challenges, opportunities and the response. *International Policy Forum* (Animal Production and Health Commission for Asia and the Pacific, International Livestock Research Institute and Food and Agriculture Organization of the United Nations).
31. Guèye EHF (1998) Village egg and fowl meat production in Africa. *World's Poultry Science Journal* 54(1):82-86.
32. Msami H (2007) Tanzania: Poultry sector country review. (Food and Agriculture Organization of the United Nations (FAO)).
33. Moges F, Tegegne A, & Dessie T (2010) *Indigenous chicken production and marketing systems in Ethiopia: Characteristics and opportunities for market-oriented development* (ILRI (aka ILCA and ILRAD)).
34. Delgado CL (1999) *Livestock to 2020: The next food revolution* (International Food Policy Research Institute).
35. Bruinsma J (2003) *World agriculture: towards 2015/2030: an FAO perspective* (Earthscan).
36. Maltoglou I & Rapsomanikis G (2005) The Contribution of Livestock to Household Income in Viet Nam: A Household Typology Based Analysis. *Pro-Poor Livestock Policy Initiative (PPLPI) Working Paper* 21.
37. FAO-OIE-WHO (2005) A Global strategy for the progressive control of highly pathogenic avian influenza (HPAI). (Food and Agriculture Organization of the United Nations (FAO)).
38. Rodríguez LC, Herrero M, & Baltenweck I (2011) Community-based interventions for the use and conservation of animal genetic resources: The case of indigenous scavenger chicken production in Benin. *Tropical Animal Health and Production* 43(5):961-966.
39. Herrero M, Fawcett R, & Jessop N (2002) Predicting Intake and Nutrient Supply of Tropical and Temperate Diets for Ruminants Using a Simple Dynamic Model of Digestion. (Institute of Ecology and Resource Management, University of Edinburgh, UK).

40. Herrero M, Fawcett RH, & Dent JB (1999) Bio-economic evaluation of dairy farm management scenarios using integrated simulation and multiple-criteria models. *Agricultural Systems* 62(3):169-188.
41. Illius AW & Gordon IJ (1991) Prediction of intake and digestion in ruminants by a model of rumen kinetics integrating animal size and plant characteristics. *The Journal of Agricultural Science* 116(01):145-157.
42. Sniffen CJ, O'Connor JD, Van Soest PJ, Fox DG, & Russell JB (1992) A net carbohydrate and protein system for evaluating cattle diets: II. Carbohydrate and protein availability. *Journal of animal science* 70(11):3562-3577.
43. Alderman G & Cottrill B (1993) *Energy and protein requirements of ruminants: an advisory manual prepared by the AFRC Technical Committee on Responses to Nutrients* (Cab International, Wallingford, UK).
44. Waldo DR, Smith LW, & Cox EL (1972) Model of Cellulose Disappearance from the Rumen. *Journal of Dairy Science* 55(1):125 - 129.
45. Mertens DR & Ely LO (1979) A Dynamic Model of Fiber Digestion and Passage in the Ruminant for Evaluating Forage Quality. *Journal of Animal Science* 49(4):1085-1095.
46. Ørskov ER & McDonald I (1979) The estimation of protein degradability in the rumen from incubation measurements weighted according to rate of passage. *The Journal of Agricultural Science* 92:499-503.
47. Illius AW & Allen MS (1994) Forage Quality, Evaluation and Utilization. eds Fahey G & et al. (American Society of Agronomy, Madison, US), pp 869-890.
48. INRA (1989) *Ruminant Nutrition. Recommended Allowances and Feed Tables* (INRA Editions, Paris, France) p 389.
49. NRC (1996) *Nutrient requirements of beef cattle. Seventh Revised Edition* (National Academy Press, Washington D.C., US).
50. NRC (2001) *Nutrient requirements of dairy cattle. Sixth Revised Edition* (National Academy Press, Washington D.C., US).
51. SCA (1990) *Feeding systems for Australian livestock: Ruminants* (CSIRO Publications, Melbourne, Australia).
52. Minson DJ (1990) *Forage in Ruminant Nutrition* (Academic Press: San Diego, California).
53. Istasse L, Smart RI, & Ørskov ER (1986) Comparison between two methods of feeding concentrate to sheep given a diet high or low in concentrate with or without buffering substances. *Animal Feed Science and Technology* 16(1-2):37 - 49.
54. Ørskov ER (1992) *Protein Nutrition in Ruminants. Second Edition* (Academic Press, London, UK).
55. Russell J, O'connor J, Fox D, Van Soest P, & Sniffen C (1992) A net carbohydrate and protein system for evaluating cattle diets: I. Ruminal fermentation. *Journal of Animal Science* 70(11):3551-3561.
56. Murphy MR, Baldwin RL, & Koong LJ (1982) Estimation of Stoichiometric Parameters for Rumen Fermentation of Roughage and Concentrate Diets. *Journal of Animal Science* 55(2):411-421.
57. Gill M, Beever D, & France J (1989) Biochemical bases needed for the mathematical representation of whole animal metabolism. *Nutrition Research Reviews* 2:181-200.
58. Argyle JL & Baldwin RL (1988) Modeling of Rumen Water Kinetics and Effects of Rumen pH Changes. *Journal of Dairy Science* 71(5):1178-1188.
59. Czerkawski JW (1986) *An Introduction to Rumen Studies* (Pergamon Press, Oxford, UK).
60. Fox DG, Barry MC, Pitt RE, Roseler DK, & Stone WC (1995) Application of the Cornell Net Carbohydrate and Protein model for cattle consuming forages. *Journal of Animal Science* 73(1):267-277.

61. O'Connor JD, Sniffen CJ, Fox DG, & Chalupa W (1993) A net carbohydrate and protein system for evaluating cattle diets: IV. Predicting amino acid adequacy. *Journal of Animal Science* 71(5):1298-1311.
62. McDonald I (1981) A revised model for the estimation of protein degradability in the rumen. *The Journal of Agricultural Science* 96:251-252.
63. Pell AN & Schofield P (1993) Computerized Monitoring of Gas Production to Measure Forage Digestion In Vitro. *Journal of Dairy Science* 76(4):1063 - 1073.
64. Ørskov ER (1994) Livestock Production in the 21st Century - Priorities and Research Needs. ed Thacker PA (University of Saskatchewan, Saskatchewan, Canada), pp 1-10.
65. Baldwin RL, Koong LJ, & Ulyatt MJ (1977) A dynamic model of ruminant digestion for evaluation of factors affecting nutritive value. *Agricultural Systems* 2(4):255 - 288.
66. Baldwin RL, Thornley JHM, & Beever DE (1987) Metabolism of the lactating cow: II. Digestive elements of a mechanistic model. *Journal of Dairy Research* 54:107-131.
67. Kennedy P & Murphy M (1988) The nutritional implications of differential passage of particles through the ruminant alimentary tract. *Nutrition Research Reviews* 1:189-208.
68. Elimam ME & Ørskov ER (1984) Factors affecting the outflow of protein supplements from the rumen. 2. The composition and particle size of the basal diet. *Animal Science* 39:201-206.
69. Black JL, Beever DE, Faichney GJ, Howarth BR, & Graham NM (1981) Simulation of the effects of rumen function on the flow of nutrients from the stomach of sheep: Part 1—Description of a computer program. *Agricultural Systems* 6(3):195-219.
70. Blaxter KL (1989) *Energy Metabolism in Animals and Man* (Cambridge University Press, Cambridge).
71. Kaitho RJ, *et al.* (1997) Relationships between preference, rumen degradability, gas production and chemical composition of browses. *Agroforestry Systems* 39(2):129-144.
72. Kariuki JN, *et al.* (1998) Effect of feeding napier grass, lucerne and sweet potato vines as sole diets to dairy heifers on nutrient intake, weight gain and rumen degradation. *Livestock Production Science* 55(1):13-20.
73. Shem MN, Ørskov ER, & Kimambo AE (1995) Prediction of voluntary dry-matter intake, digestible dry-matter intake and growth rate of cattle from the degradation characteristics of tropical foods. *Animal Science* 60:65-74.
74. Tolera A & Sundstøl F (2000) Supplementation of graded levels of *Desmodium intortum* hay to sheep feeding on maize stover harvested at three stages of maturity: 1. Feed intake, digestibility and body weight change. *Animal Feed Science and Technology* 85(3-4):239-257.
75. Euclides BPB, Zimmer HA, & Oliveira PM (1993) Evaluation of *Brachiaria decumbens* and *Brachiaria brizantha* under grazing. *Proceedings 17th International Grassland Congress*.
76. Joaquin N & Herrero M (2001) Intake of lactating and dry dual-purpose cows grazing two species of *Brachiaria* pastures in Santa Cruz, Bolivia. . *Proceedings of the British Society of Animal Science* 103.
77. Soto Krebs L, Laredo Covarrubias M, & Alarcon Millan E (1979) Digestibilidad y consumo voluntario del pasto kikuyo, *Pennisetum clandestinum* Hochst, en ovinos bajo fertilizacion nitrogenada. *Revista ICA* 15(2):79-90.
78. Herrero M, Thornton PK, Kruska R, & Reid RS (2008) Systems dynamics and the spatial distribution of methane emissions from African domestic ruminants to 2030. *Agriculture, Ecosystems and Environment* 126(1-2):122-137.
79. FAO (2010) Greenhouse Gas Emissions from the Dairy Sector: A Life Cycle Assessment. (Food and Agriculture Organization of the United Nations).

80. Thornton PK & Herrero M (2010) Potential for reduced methane and carbon dioxide emissions from livestock and pasture management in the tropics. *Proceedings of the National Academy of Sciences* 107(46):19667-19672.
81. Abate A, Dzowela B, & Kategile J (1993) Intensive animal feeding practices for optimum feed utilisation. *Future of Livestock Industries in Eastern and Southern Africa: Workshop Proceedings*, (ILRI (aka ILCA and ILRAD)), p 9.
82. Alfonso-Ávila ÁR, Wattiaux MA, Espinoza-Ortega A, Sánchez-Vera E, & Arriaga-Jordán CM (2012) Local feeding strategies and milk composition in small-scale dairy production systems during the rainy season in the highlands of Mexico. *Tropical Animal Health and Production* 44(3):637-644.
83. Anandan S, Khan AA, Ravi D, Reddy J, & Blümme M (2010) A comparison of sorghum stover based complete feed blocks with a conventional feeding practice in a peri urban dairy. *Animal Nutrition and Feed Technology* 10(SUPPL. 1):23-28.
84. Anandan S, *et al.* (2013) Identification of a superior dual purpose maize hybrid among widely grown hybrids in South Asia and value addition to its stover through feed supplementation and feed processing. *Field Crops Research* (In press).
85. Ayantunde AA (1998) Influence of grazing regimes on cattle nutrition and performance and vegetation dynamics in Sahelian rangelands. (Wageningen Agricultural University.).
86. Bebe BO (2003) *Herd dynamics of smallholder dairy in the Kenya highlands* (Wageningen Universiteit).
87. Blummel M & Rao PP (2006) Economic value of sorghum stover traded as fodder for urban and peri-urban dairy production in Hyderabad, India. *International Sorghum and Millets Newsletter* 47:97-100.
88. Chalupa W, Boston R, & Square K (2003) Development of the CNCPS and CPM models: the Sniffen affect. *Proceedings of Cornell Nutrition Conference for Feed Manufacturers*, pp 15-24.
89. Chaudhary U & Tripathi M (2011) Feeding of Small Ruminants. *Animal Nutrition - Advancements in Feeds and Feeding of Livestock* (Agrobios (India)), pp 81-102.
90. De Leeuw P (1997) Crop residues in tropical Africa: trends in supply, demand and use. *Crop residues in sustainable mixed crop/livestock farming systems. Proceedings of an international workshop*, pp 41-77.
91. Duku S, van der Zijpp AJ, & Howard P (2010) Small ruminant feed systems: Perceptions and practices in the transitional zone of Ghana. *Journal of Ethnobiology and Ethnomedicine* 6.
92. Fernández-Rivera S, *et al.* (2005) Nutritional constraints to grazing ruminants in the millet-cowpea-livestock farming system of the Sahel. *Coping with feed scarcity in smallholder livestock systems in developing countries*:157-182.
93. Galyean ML, Ponce C, & Schutz J (2011) The future of beef production in North America. *Animal Frontiers* 1(2):29-36.
94. Gowda N, Pal D, Gupta R, Prasad C, & Sampath K (2009) *Feed Resources and Feeding Practices in Different Agro-Eco Zones of India* (National Institute of Animal Nutrition and Physiology, Bangalore, India ).
95. Kebreab E, Smith T, Tanner J, & Osuji P (2005) Review of undernutrition in smallholder ruminant production systems in the tropics. (International Livestock Research Institute (ILRI)).
96. Lassey KR, Ulyatt MJ, Martin RJ, Walker CF, & Shelton ID (1997) Methane emissions measured directly from grazing livestock in New Zealand. *Atmospheric Environment* 31(18):2905-2914.
97. Little S ed (2010) *Feeding practices on Australian dairy farms 2008-2009 (Grains2Milk Programme)* (Dairy Australia).

98. Millen DD, Pacheco RDL, Arrigoni MDB, Galyean ML, & Vasconcelos JT (2009) A snapshot of management practices and nutritional recommendations used by feedlot nutritionists in Brazil. *Journal of Animal Science* 87(10):3427-3439.
99. Millen DD, Pacheco RDL, Meyer PM, Rodrigues PHM, & Arrigoni MDB (2011) Current outlook and future perspectives of beef production in Brazil. *Animal Frontiers* 1(2):46-52.
100. Reddy PB, Reddy TJ, & Reddy YR (2012) Growth and nutrient utilization in kids fed expander-extruded complete feed pellets containing red gram (*Cajanus cajan*) straw. *Asian-Australasian Journal of Animal Sciences* 25(12):1721-1725.
101. Salem HB, Makkar H, & Nefzaoui A (2004) Towards better utilisation of non-conventional feed sources by sheep and goats in some African and Asian countries. *Options Méditerranéennes: Série A* 59:177-187.
102. Kumari NN, *et al.* (2012) Growth performance and carcass characteristics of growing ram lambs fed sweet sorghum bagasse-based complete rations varying in roughage-to-concentrate ratios. *Tropical Animal Health and Production* 45(1):649-655.
103. Ndikumana J & de Leuw P (1993) Sustainable Feed Production and Utilisation for Smallholder Livestock Enterprises in Sub-Saharan Africa. *Second African Feed Resources Network (AFRNET) Workshop*.
104. Nordblom T, Goodchild A, Shomo F, Gintzburger G, & Renard C (1997) Dynamics of feed resources in mixed farming systems of West/Central Asia-North Africa. *Crop residues in sustainable mixed crop/livestock farming systems*:131-148.
105. Olesen JE, *et al.* (2006) Modelling greenhouse gas emissions from European conventional and organic dairy farms. *Agriculture, Ecosystems and Environment* 112(2-3):207-220.
106. Pelletier N, Pirog R, & Rasmussen R (2010) Comparative life cycle environmental impacts of three beef production strategies in the Upper Midwestern United States. *Agricultural Systems* 103(6):380-389.
107. Powell JM, Li Y, Wu Z, Broderick GA, & Holmes BJ (2008) Rapid assessment of feed and manure nutrient management on confinement dairy farms. *Nutrient Cycling in Agroecosystems* 82(2):107-115.
108. Powell JM, *et al.* (2013) Feed-milk-manure nitrogen relationships in global dairy production systems. *Livestock Science* 152(2-3):261-272.
109. Quiroz RA, Pezo DA, Rearte DH, & San Martín F (1997) Dynamics of feed resources in mixed farming systems of Latin America. in *Crop residues in sustainable mixed crop/livestock systems*. (CAB International, Wallingford, UK), pp 149-180.
110. Reddy BV, Ashok Kumar A, Ravinder Reddy C, Rao P, & Patil J (2013) Sweet sorghum bagasse – An alternative feed resource for livestock. *Developing a Sweet Sorghum Ethanol Value Chain*, (International Crops Research Institute for the Semi-Arid Tropics), pp 141-154.
111. Romney D, Thorne P, Lukuyu B, & Thornton P (2003) Maize as food and feed in intensive smallholder systems: management options for improved integration in mixed farming systems of east and southern Africa. *Field Crops Research* 84(1):159-168.
112. Roxas DB, Wanapat M, & Winugroho M (1997) Dynamics of feed resources in mixed farming systems in Southeast Asia. in *Crop Residues in Sustainable Mixed Crop/Livestock Farming Systems* (CAB International, Wallingford, UK).
113. Sahoo A (2010) Exploitation of local feed resources for efficient small ruminant production: limitations and prospects. *Animal Nutrition Strategies for Environment Protection and Poverty Alleviation, Proceedings 7th Biennial Conference of Animal Nutrition Association*.



114. Singh K, Habib G, Siddiqui M, & Ibrahim M (1997) Dynamics of feed resources in mixed farming systems of South Asia. in *Crop residues in sustainable mixed crop/livestock farming systems* (CAB International, Wallingford, UK), pp 113-130.
115. Tedeschi LO, *et al.* (2008) Evaluation and application of the CPM Dairy Nutrition model. *Journal of Agricultural Science* 146(2):171-182.
116. Zemelink G & Romney D (1999) Dairy farming in Kenya: resource utilization and N-flows. in *Tropical Animal Health and Production, Symposium on Outcome and perspectives of collaborative research* (Faculty of Veterinary Medicine, De Uithof, Utrecht, The Netherlands).
117. Valbuena DF, *et al.* (2012) Conservation Agriculture in mixed crop–livestock systems: Scoping crop residue trade-offs in Sub-Saharan Africa and South Asia. *Field Crop Research* (132):175-184.
118. Nordblom T & Shomo F (1995) *Food and feed prospects to 2020 in the West Asia/North Africa region* (ICARDA).
119. Fox DG, *et al.* (2004) The Cornell Net Carbohydrate and Protein System model for evaluating herd nutrition and nutrient excretion. *Animal Feed Science and Technology* 112(1-4):29-78.
120. Tedeschi LO, Cannas A, & Fox DG (2010) A nutrition mathematical model to account for dietary supply and requirements of energy and other nutrients for domesticated small ruminants: The development and evaluation of the Small Ruminant Nutrition System. *Small Ruminant Research* 89(2-3):174-184.
121. Herrero M, *et al.* (2004) DYNAFEED: A database of dynamic nutritional characteristics of tropical feeds for ruminants. Version 2.0. (International Livestock Research Institute, Nairobi, Kenya, CD-ROM).
122. Blummel M, *et al.* (2006) ILRI strategy on feed resources. (International Livestock Research Institute Nairobi).
123. IPCC (2006) *IPCC guidelines for national greenhouse gas inventories* (Institute for Global Environmental Strategies, Hayama, Japan).
124. Safley L, Westerman P, & Barker J (1986) Fresh dairy manure characteristics and barnlot nutrient losses. *Agricultural Wastes* 17(3):203-215.
125. Brouwer J & Powell JM (1998) Increasing nutrient use efficiency in West-African agriculture: the impact of micro-topography on nutrient leaching from cattle and sheep manure. *Agriculture, ecosystems & environment* 71(1):229-239.
126. Oenema O, Oudendag D, & Velthof GL (2007) Nutrient losses from manure management in the European Union. *Livestock Science* 112(3):261-272.
127. Centner TJ (2011) Addressing water contamination from concentrated animal feeding operations. *Land Use Policy* 28(4):706-711.
128. Cuéllar AD & Webber ME (2008) Cow power: the energy and emissions benefits of converting manure to biogas. *Environmental Research Letters* 3(3):034002.
129. Predotova M, Gebauer J, Diogo RV, Schlecht E, & Buerkert A (2010) Emissions of ammonia, nitrous oxide and carbon dioxide from urban gardens in Niamey, Niger. *Field Crops Research* 115(1):1-8.
130. Petersen SO, Lind A-M, & Sommer SG (1998) Nitrogen and organic matter losses during storage of cattle and pig manure. *The Journal of Agricultural Science* 130(1):69-79.
131. Chadwick DR (2005) Emissions of ammonia, nitrous oxide and methane from cattle manure heaps: effect of compaction and covering. *Atmospheric Environment* 39(4):787 - 799.

132. Külling D, *et al.* (2001) Emissions of ammonia, nitrous oxide and methane from different types of dairy manure during storage as affected by dietary protein content. *The Journal of Agricultural Science* 137:235-250.
133. Wolf B, *et al.* (2010) Grazing-induced reduction of natural nitrous oxide release from continental steppe. *Nature* 464(7290):881-884.
134. Paillat J-M, Robin P, Hassouna M, & Leterme P (2005) Predicting ammonia and carbon dioxide emissions from carbon and nitrogen biodegradability during animal waste composting. *Atmospheric Environment* 39(36):6833-6842.
135. Dick J, *et al.* (2008) The contribution of agricultural practices to nitrous oxide emissions in semi-arid Mali. *Soil Use and Management* 24(3):292-301.
136. Predotova M, Schlecht E, & Buerkert A (2010) Nitrogen and carbon losses from dung storage in urban gardens of Niamey, Niger. *Nutrient Cycling in Agroecosystems* 87(1):103-114.
137. Martins O & Dewes T (1992) Loss of nitrogenous compounds during composting of animal wastes. *Bioresource Technology* 42(2):103 - 111.
138. Kebreab E, Clark K, Wagner-Riddle C, & France J (2006) Methane and nitrous oxide emissions from Canadian animal agriculture: A review. *Canadian Journal of Animal Science* 86(2):135-157.
139. Hailelassie A, Priess J, Veldkamp E, Teketay D, & Lesschen JP (2005) Assessment of soil nutrient depletion and its spatial variability on smallholders' mixed farming systems in Ethiopia using partial versus full nutrient balances. *Agriculture, ecosystems & environment* 108(1):1-16.
140. Hailelassie A, Priess JA, Veldkamp E, & Lesschen JP (2007) Nutrient flows and balances at the field and farm scale: Exploring effects of land-use strategies and access to resources. *Agricultural Systems* 94(2):459-470.
141. Nyamukanza C, Scogings P, Mbatha K, & Kunene N (2010) Forage–sheep relationships in communally managed moist thornveld in Zululand, KwaZulu-Natal, South Africa. *African Journal of Range & Forage Science* 27(1):11-19.
142. Preston D, *et al.* (2003) Grazing and environmental change on the Tarija Altiplano, Bolivia. *Mountain Research and Development* 23(2):141-148.
143. Adler PB & Morales JM (1999) Influence of environmental factors and sheep grazing on an Andean grassland. *Journal of Range Management* 52(5):471-481.
144. Alvarez R, Villca S, & Lidén G (2006) Biogas production from llama and cow manure at high altitude. *Biomass and Bioenergy* 30(1):66-75.
145. Sillar B (2000) Dung by preference: The choice of fuel as an example of how Andean pottery production is embedded within wider technical, social, and economic practices. *Archaeometry* 42(1):43-60.
146. Holst J, *et al.* (2007) Importance of point sources on regional nitrous oxide fluxes in semi-arid steppe of Inner Mongolia, China. *Plant and soil* 296(1-2):209-226.
147. Chen W, Wolf B, Brüggemann N, Butterbach-Bahl K, & Zheng X (2011) Annual emissions of greenhouse gases from sheepfolds in Inner Mongolia. *Plant and soil* 340(1-2):291-301.
148. Wang J, Cardenas LM, Misselbrook TH, & Gilhespy S (2011) Development and application of a detailed inventory framework for estimating nitrous oxide and methane emissions from agriculture. *Atmospheric Environment* 45(7):1454-1463.
149. Kaparaju P & Rintala J (2011) Mitigation of greenhouse gas emissions by adopting anaerobic digestion technology on dairy, sow and pig farms in Finland. *Renewable Energy* 36(1):31-41.

150. Lazarus WF & Rudstrom M (2007) The economics of anaerobic digester operation on a Minnesota dairy farm. *Review of Agricultural Economics* 29(2):349-364.
151. White AJ, Kirk DW, & Graydon JW (2011) Analysis of small-scale biogas utilization systems on Ontario cattle farms. *Renewable Energy* 36(3):1019-1025.
152. Eghball B, Power JF, Gilley JE, & Doran JW (1997) Nutrient, carbon, and mass loss during composting of beef cattle feedlot manure. *Journal of Environmental Quality* 26(1):189-193.
153. Omotayo AM (2003) Ecological implications of Fulbe pastoralism in southwestern Nigeria. *Land Degradation & Development* 14(5):445-457.
154. Kanmegne J, Smaling EMA, Brussaard L, Gansop-Kouomegne A, & Boukong A (2006) Nutrient flows in smallholder production systems in the humid forest zone of southern Cameroon. *Nutrient Cycling in Agroecosystems* 76(2-3):233-248.
155. Bassett TJ & Turner MD (2007) Sudden shift or migratory drift? Fulbe herd movements to the Sudano-Guinean region of West Africa. *Human Ecology* 35(1):33-49.
156. Cerri CC, *et al.* (2009) Brazilian greenhouse gas emissions: the importance of agriculture and livestock. *Scientia Agricola* 66:831 - 843.
157. Tamang N & Perkins J (2005) Cattle management systems in humid subtropical areas of Western Bhutan. *Journal of Bhutan Studies* 13:105-118.
158. Simaraks S, Subhadhira S, & Srila S (2003) The shifting role of large livestock in Northeast Thailand. *Southeast Asian Studies* 41(3):316-329.
159. Hyde B, Carton O, O'toole P, & Misselbrook T (2003) A new inventory of ammonia emissions from Irish agriculture. *Atmospheric Environment* 37(1):55-62.
160. Turner MD, Hiernaux P, & Schlecht E (2005) The distribution of grazing pressure in relation to vegetation resources in semi-arid West Africa: the role of herding. *Ecosystems* 8(6):668-681.
161. Kizza S, Totolo O, Perkins J, & Areola O (2010) Analysis of persistence soil nutrient status in abandoned cattle kraals in a semi arid area in Botswana. *Scientific Research and Essays* 5(23):3613-3622.
162. Moritz M (2010) Crop–livestock interactions in agricultural and pastoral systems in West Africa. *Agriculture and human values* 27(2):119-128.
163. Okike I, Jabbar M, Manyong V, & Smith J (2005) Ecological and Socio-Economic Factors Affecting Agricultural Intensification in the West African Savannas: Evidence from Northern Nigeria. *Journal of Sustainable Agriculture* 27(2):5-37.
164. Materechera SA (2010) Utilization and management practices of animal manure for replenishing soil fertility among smallscale crop farmers in semi-arid farming districts of the North West Province, South Africa. *Nutrient Cycling in Agroecosystems* 87(3):415-428.
165. Golluscio RA, *et al.* (2009) Sheep grazing decreases organic carbon and nitrogen pools in the Patagonian Steppe: combination of direct and indirect effects. *Ecosystems* 12(4):686-697.
166. Guevara J, *et al.* (2009) Range and livestock production in the Monte Desert, Argentina. *Journal of Arid Environments* 73(2):228-237.
167. Bauer K & Magri A (2011) The herder's environment: a GIS case study of resource use patterns among pastoralists in Central Tibet. *Journal of Land Use Science* 6(1):1-12.
168. Omer R, Hester A, Gordon I, Swaine M, & Raffique S (2006) Seasonal changes in pasture biomass, production and offtake under the transhumance system in northern Pakistan. *Journal of arid environments* 67(4):641-660.

169. Kellogg RL, Lander CH, Moffitt DC, & Gollehon N (2000) Manure nutrients relative to the capacity of cropland and pastureland to assimilate nutrients: Spatial and temporal trends for the United States. in *Proceedings of the Water Environment Federation*, pp 18-157.
170. EPA (2010) Inventory of US GHG 1990-2008. ed Agency USEP.
171. NASS ed (2010) *Statistics on agricultural production in the USA* (Agricultural Statistics Board, National Agricultural Statistics Service (NASS), U.S. Department of Agriculture).
172. Rufino MC, Rowe EC, Delve RJ, & Giller KE (2006) Nitrogen cycling efficiencies through resource-poor African crop–livestock systems. *Agriculture, ecosystems & environment* 112(4):261-282.
173. Rufino MC, *et al.* (2007) Manure as a key resource within smallholder farming systems: analysing farm-scale nutrient cycling efficiencies with the NUANCES framework. *Livestock Science* 112(3):273-287.
174. Lekasi J, Tanner J, Kimani S, & Harris P (2003) Cattle manure quality in Maragua District, Central Kenya: effect of management practices and development of simple methods of assessment. *Agriculture, ecosystems & environment* 94(3):289-298.
175. Tittonell P, Rufino M, Janssen B, & Giller K (2010) Carbon and nutrient losses during manure storage under traditional and improved practices in smallholder crop-livestock systems—evidence from Kenya. *Plant and Soil* 328(1-2):253-269.
176. Parawira W (2009) Biogas technology in sub-Saharan Africa: status, prospects and constraints. *Reviews in Environmental Science and Bio/Technology* 8(2):187-200.
177. Poeschl M, Ward S, & Owende P (2010) Prospects for expanded utilization of biogas in Germany. *Renewable and sustainable energy reviews* 14(7):1782-1797.
178. Oenema O (2006) Nitrogen budgets and losses in livestock systems. in *International Congress Series* (Elsevier), pp 262-271.
179. Weiske A, *et al.* (2006) Mitigation of greenhouse gas emissions in European conventional and organic dairy farming. *Agriculture, Ecosystems & Environment* 112(2–3):221-232.
180. Büttner U & Hauser S (2003) Farmers’ nutrient management practices in indigenous cropping systems in southern Cameroon. *Agriculture, Ecosystems & Environment* 100(2):103-110.
181. Hao X, Chang C, & Larney FJ (2004) Carbon, nitrogen balances and greenhouse gas emission during cattle feedlot manure composting. *Journal of Environmental Quality* 33(1):37-44.
182. Devendra C & Thomas D (2002) Crop–animal interactions in mixed farming systems in Asia. *Agricultural Systems* 71(1):27-40.
183. Ravindranath N, *et al.* (2005) Assessment of sustainable non-plantation biomass resources potential for energy in India. *Biomass and Bioenergy* 29(3):178-190.
184. Agoramoorthy G & Hsu MJ (2008) Biogas plants ease ecological stress in India's remote villages. *Human Ecology* 36(3):435-441.
185. Ramisch JJ (2005) Inequality, agro-pastoral exchanges, and soil fertility gradients in southern Mali. *Agriculture, ecosystems & environment* 105(1):353-372.
186. Mishra VK, Retherford RD, & Smith KR (1999) Biomass cooking fuels and prevalence of tuberculosis in India. *International Journal of infectious diseases* 3(3):119-129.
187. Viswanathan B & Kavi Kumar K (2005) Cooking fuel use patterns in India: 1983–2000. *Energy Policy* 33(8):1021-1036.
188. Yevich R & Logan JA (2003) An assessment of biofuel use and burning of agricultural waste in the developing world. *Global Biogeochemical Cycles* 17(4):1-41.

189. Reddy KS, Kumar N, Sharma AK, Acharya CL, & Dalal RC (2005) Biophysical and sociological impacts of farmyard manure and its potential role in meeting crop nutrient needs: A farmers' survey in Madhya Pradesh, India. *Australian Journal of Experimental Agriculture* 45(4):357-367.
190. Bouwman AF, *et al.* (1997) A global high-resolution emission inventory for ammonia. *Global Biogeochemical Cycles* 11(4):561-587.
191. Smil V (1999) Nitrogen in crop production: An account of global flows. *Global Biogeochemical Cycles* 13(2):647-662.
192. Mosier A, *et al.* (1998) Closing the global N<sub>2</sub>O budget: nitrous oxide emissions through the agricultural nitrogen cycle. *Nutrient Cycling in Agroecosystems* 52(2-3):225-248.
193. Gerber P, Chilonda P, Franceschini G, & Menzi H (2005) Geographical determinants and environmental implications of livestock production intensification in Asia. *Bioresource Technology* 96(2):263-276.
194. Missohou A, Niang M, Foucher H, & Dieye PN (2002) Les systèmes d'élevage porcin en Basse Casamance (Sénégal). *Cahiers Agricultures* 10(6):405-408.
195. Ganaba R, *et al.* (2011) Factors associated with the prevalence of circulating antigens to porcine cysticercosis in three villages of Burkina Faso. *PLoS neglected tropical diseases* 5(1):e927.
196. Ajala M, Adeshinwa A, & Mohammed A (2007) Characteristics of smallholder pig production in Southern Kaduna area of Kaduna state, Nigeria. *American–Eurasian Journal of Agriculture and Environmental Science* 2:182-187.
197. Permin A, *et al.* (1999) Parasites in cross-bred pigs in the Upper East Region of Ghana. *Veterinary Parasitology* 87(1):63-71.
198. Pouedet M, *et al.* (2002) Epidemiological survey of swine cysticercosis in two rural communities of West-Cameroon. *Veterinary Parasitology* 106(1):45-54.
199. Pondja A, *et al.* (2010) Prevalence and risk factors of porcine cysticercosis in Angonia District, Mozambique. *PLoS neglected tropical diseases* 4(2):e594.
200. Nsoso S, Mannathoko G, & Modise K (2006) Monitoring production, health and marketing of indigenous Tswana pigs in Ramotswa village of Botswana. *Livest Res Rural Dev* 18:125.
201. Sikasunge C, *et al.* (2007) Risk factors associated with porcine cysticercosis in selected districts of Eastern and Southern provinces of Zambia. *Veterinary Parasitology* 143(1):59-66.
202. Sambou G (2010) Les éleveurs de porcs recycleurs de déchets organiques à Mbeubeuss : entre désespoir et quête d'une vie meilleure. in *PIGTrop* (CIRAD).
203. Ocampo L, Leterme P, & Buldgen A (2005) A survey of pig production systems in the rain forest of the Pacific coast of Colombia. *Tropical animal health and production* 37(4):315-326.
204. Belli Filho P, Castilhos Jr ABd, Costa RHd, Soares SR, & Perdomo CC (2001) Technology for swine waste treatment. *Revista Brasileira de Engenharia Agrícola e Ambiental* 5(1):166-170.
205. Peters D, Tinh NT, Hoan MT, Thach PN, & Fuglie K (2005) Rural income generation through improving crop-based pig production systems in Vietnam: Diagnostics, interventions, and dissemination. *Agriculture and Human Values* 22(1):73-85.
206. Lemke U, Kaufmann B, Thuy L, Emrich K, & Valle Zárate A (2006) Evaluation of smallholder pig production systems in North Vietnam: Pig production management and pig performances. *Livestock science* 105(1):229-243.
207. Vu T, Tran M, & Dang T (2007) A survey of manure management on pig farms in Northern Vietnam. *Livestock Science* 112(3):288-297.

208. Phengsavanh P, Ogle B, Stür W, Frankow-Lindberg BE, & Lindberg JE (2010) Feeding and performance of pigs in smallholder production systems in Northern Lao PDR. *Tropical animal health and production* 42(8):1627-1633.
209. Kumaresan A, *et al.* (2007) Performance of pigs reared under traditional tribal low input production system and chemical composition of non-conventional tropical plants used as pig feed. *Livestock Science* 107(2):294-298.
210. Kumaresan A, Bujarbaruah K, Pathak K, Das A, & Bardoloi R (2009) Integrated resource-driven pig production systems in a mountainous area of Northeast India: production practices and pig performance. *Tropical animal health and production* 41(7):1187-1196.
211. Kunz A, Miele M, & Steinmetz R (2009) Advanced swine manure treatment and utilization in Brazil. *Bioresource Technology* 100(22):5485-5489.
212. Menzi H, *et al.* (2010) Impacts of intensive livestock production and manure management on the environment. in *Livestock in a Changing Landscape, Volume 1: Drivers, Consequences, and Responses*, pp 139-163.
213. Burton C & Martinez J (2008) Contrasting the management of livestock manures in Europe with the practice in Asia: What lessons can be learnt? *Outlook on Agriculture* 37(3):195-201.
214. Tran M, Vu T, Sommer SG, & Jensen LS (2011) Nitrogen turnover and loss during storage of slurry and composting of solid manure under typical Vietnamese farming conditions. *Journal of Agricultural Science-London* 149(3):285.
215. Bernet N & Béline F (2009) Challenges and innovations on biological treatment of livestock effluents. *Bioresource technology* 100(22):5431-5436.
216. Senez L, Couton Y, Devroe C, Théobald O, & Germon J (1997) Bilan de fonctionnement d'une filiere de traitement du lisier a la ferme integrant un dispositif pilote d'elimination de l'azote. *Journées de la recherche porcine en France* 29:327-334.
217. Flotats X, Bonmatí A, Fernández B, & Magrí A (2009) Manure treatment technologies: on-farm versus centralized strategies. NE Spain as case study. *Bioresource Technology* 100(22):5519-5526.
218. Misselbrook T, *et al.* (2006) Inventory of ammonia emissions from UK agriculture 2004. (DEFRA).
219. Wing S, Freedman S, & Band L (2002) The potential impact of flooding on confined animal feeding operations in eastern North Carolina. *Environmental Health Perspectives* 110(4):387.
220. Sheppard S, Bittman S, Swift M-L, & Tait J (2010) Farm practices survey and modelling to estimate monthly NH<sub>3</sub> emissions from swine production in 12 Ecoregions of Canada. *Canadian Journal of Animal Science* 90(2):145-158.
221. Rao PV, Baral SS, Dey R, & Mutnuri S (2010) Biogas generation potential by anaerobic digestion for sustainable energy development in India. *Renewable and sustainable energy reviews* 14(7):2086-2094.
222. Lanyasanya T, *et al.* (2006) Factors limiting use of poultry manure as protein supplement for dairy cattle on smallholder farms in Kenya. *International Journal of Poultry Sciences* 5(1):75-80.
223. Guèye EF (2000) The role of family poultry in poverty alleviation, food security and the promotion of gender equality in rural Africa. *Outlook on Agriculture* 29(2):129-136.
224. Gollehon NR, *et al.* (2001) Confined animal production and manure nutrients. (United States Department of Agriculture, Economic Research Service).
225. Graham J & Nachman K (2010) Managing waste from confined animal feeding operations in the United States: the need for sanitary reform. *Journal of water and health* 8(4):646-670.
226. Boyd W (2001) Making meat: Science, technology, and American poultry production. *Technology and Culture* 42(4):631-664.

227. Sapkota AR, Lefferts LY, McKenzie S, & Walker P (2007) What do we feed to food-production animals? A review of animal feed ingredients and their potential impacts on human health. *Environmental Health Perspectives* 115(5):663.
228. Sheppard S, Bittman S, Beaulieu M, & Sheppard M (2009) Ecoregion and farm size differences in feed and manure nitrogen management: 1. Survey methods and results for poultry. *Canadian Journal of Animal Science* 89(1):1-19.
229. Coufal C, Chavez C, Niemeyer P, & Carey J (2006) Effects of top-dressing recycled broiler litter on litter production, litter characteristics, and nitrogen mass balance. *Poultry science* 85(3):392-397.
230. Liang Y, *et al.* (2005) Ammonia emissions from U.S. laying hen houses in Iowa and Pennsylvania. *Transactions of the American Society of Agricultural Engineers* 48(5):1927-1941.
231. Smith K, Brewer A, Crabb J, & Dauven A (2001) A survey of the production and use of animal manures in England and Wales. *Soil use and management* 17(1):48-56.
232. Brand TS & Van Der Merwe JP (1997) The use of whole-grain mixtures in diets of growing-finishing pigs. *South African Journal of Animal Sciences* 27(2):47-49.
233. Amaefule KU, Okechukwu SO, Ukachukwu SN, Okoye FC, & Onwudike OC (2006) Digestibility and nutrient utilization of pigs fed graded levels of brewers' dried grain based diets. *Livestock Research for Rural Development* 18(1).
234. Rodríguez L, Preston T, & Peters K (2009) Studies on the nutritive value for pigs of New Cocoyam (*Xanthosoma sagittifolium*); digestibility and nitrogen balance with different levels of ensiled leaves in a basal diet of sugar cane juice. *Livestock Research for Rural Development* 21(2).
235. Moreira I, *et al.* (2004) Nitrogen balance of starting barrow pigs fed on increasing lysine levels. *Brazilian Archives of Biology and Technology* 47(1):85-91.
236. Lizama WT (2005) Strategies to improve the use of limited nutrient resources in pig production in the tropics. *Journal of Agriculture and Rural Development in the Tropics and Subtropics, Supplement* (85):1-108.
237. Rodrigues VV, *et al.* (2011) Nutrient reduction in rations with phytase for growing pigs. *Revista Brasileira de Zootecnia* 40(2):370-376.
238. Jarret G, Martinez J, & Dourmad JY (2011) Effect of biofuel co-products in pig diets on the excretory patterns of N and C and on the subsequent ammonia and methane emissions from pig effluent. *Animal* 5(4):622-631.
239. McDonnell P, O'Shea C, Figat S, & O'Doherty JV (2010) Influence of incrementally substituting dietary soya bean meal for rapeseed meal on nutrient digestibility, nitrogen excretion, growth performance and ammonia emissions from growing-finishing pigs. *Archives of Animal Nutrition* 64(5):412-424.
240. Xiccato G, Schiavon S, Gallo L, Bailoni L, & Bittante G (2005) Nitrogen excretion in dairy cow, beef and veal cattle, pig, and rabbit farms in Northern Italy. *Italian Journal of Animal Science* 4(3):103-111.
241. Galassi G, Colombini S, Malagutti L, Crovetto GM, & Rapetti L (2010) Effects of high fibre and low protein diets on performance, digestibility, nitrogen excretion and ammonia emission in the heavy pig. *Animal Feed Science and Technology* 161(3-4):140 - 148.
242. Torrallardona D (1999) Reduction of nitrogen excretion in pigs. Improvement of precision in nutrient requirements. *Cahiers Options Méditerranéennes* 37.
243. Otto E, Yokoyama M, Ku P, Ames N, & Trottier N (2003) Nitrogen balance and ileal amino acid digestibility in growing pigs fed diets reduced in protein concentration. *Journal of animal Science* 81(7):1743-1753.

244. Zervas S & Zijlstra R (2002) Effects of dietary protein and oat hull fiber on nitrogen excretion patterns and postprandial plasma urea profiles in grower pigs. *Journal of animal science* 80(12):3238-3246.
245. Htoo J, *et al.* (2007) The effect of feeding low-phytate hullless barley-soyabean meal diets differing in protein content to growing pigs on phosphorus and nitrogen excretion. *Journal of Animal and Feed Sciences* 16(1):53.
246. Deng D, *et al.* (2007) Nitrogen balance in barrows fed low-protein diets supplemented with essential amino acids. *Livestock Science* 109(1):220-223.
247. Vu T, Sommer G, Vu C, & Jørgensen H (2010) Assessing nitrogen and phosphorus in excreta from grower-finisher pigs fed prevalent rations in Vietnam. *Asian-Australasian Journal of Animal Sciences* 23:279-286.
248. Giang NT & Preston T (2011) Taro (*Colocacia esculenta*) silage and water spinach as supplements to rice bran for growing pigs. *Livestock Research for Rural Development*. 23(3).
249. Gu P, Shen RF, & Chen YD (2008) Diffusion pollution from livestock and poultry rearing in the Yangtze Delta, China. *Environmental Science and Pollution Research* 15(3):273-277.
250. Han IK, Lee J, Piao X, & Li D (2001) Feeding and management system to reduce environmental pollution in swine production-Review. *Asian-Australasian Journal of Animal Sciences* 14(3):432-444.
251. Ayssiwede SB, *et al.* (2010) Digestibility and metabolic utilization and nutritional value of *Leucaena leucocephala* (Lam.) leaves meal incorporated in the diets of indigenous Senegal chickens. *International Journal of Poultry Sciences* 9:767.
252. Ngambi J, Nakalebe P, Norris D, Malatje M, & Mbajjorgu C (2009) Effects of dietary energy level and tanniferous *Acacia karroo* leaf meal level of supplementation at finisher stage on performance and carcass characteristics of ross 308 Broiler chickens in South Africa. *International Journal of Poultry Sciences* 8(1):40-46.
253. Mohlapo TD, Ng'ambi J, Norris D, & Malatje M (2009) Effect of *Hoodia gordonii* meal supplementation at finisher stage on productivity and carcass characteristics of Ross 308 broiler chickens. *Tropical animal health and production* 41(7):1591-1596.
254. Da Silva YL, Rodrigues PB, De Freitas RTF, Zangeronimo MG, & Fialho ET (2008) Protein and phosphorus levels in diets with phytase for broilers chicken from 14 to 21 days-old: Energy values and nutrient digestibility. *Revista Brasileira de Zootecnia* 37(3):469-477.
255. Viana MTdS, *et al.* (2009) Efeito da suplementação de enzima fitase sobre o metabolismo de nutrientes eo desempenho de poedeiras. *Revista Brasileira de Zootecnia* 38.
256. Smith K & Frost J (2000) Nitrogen excretion by farm livestock with respect to land spreading requirements and controlling nitrogen losses to ground and surface waters. Part 1: cattle and sheep. *Bioresource Technology* 71(2):173-181.
257. Szczurek W (2010) Performance and nitrogen output in young broilers fed diets containing different plant by-products and formulated with predetermined ileal digestible amino acid values. *Annals of Animal Science* 10(3):285-298.
258. Neijat M, House J, Guenter W, & Kebreab E (2011) Production performance and nitrogen flow of Shaver White layers housed in enriched or conventional cage systems. *Poultry Science* 90(3):543-554.
259. Latshaw JD & Zhao L (2011) Dietary protein effects on hen performance and nitrogen excretion. *Poultry Science* 90(1):99-106.
260. Wu-Haan W, Powers W, Angel C, Hale C, & Applegate T (2007) Nutrient digestibility and mass balance in laying hens fed a commercial or acidifying diet. *Poultry Science* 86(4):684-690.



261. Gutierrez O, Surbakti N, Haq A, Carey J, & Bailey C (2008) Effect of continuous multiphase feeding schedules on nitrogen excretion and broiler performance. *The Journal of Applied Poultry Research* 17(4):463-470.
262. Mitran L, Harter-Dennis J, & Meisinger J (2008) Determining the nitrogen budget and total ammoniacal nitrogen emissions from commercial broilers grown in environmental chambers. *The Journal of Applied Poultry Research* 17(1):34-46.
263. Kamran Z, Sarwar M, Nisa M, Nadeem MA, & Mahmood S (2010) Effect of low levels of dietary crude protein with constant metabolizable energy on nitrogen excretion, litter composition and blood parameters of broilers. *International Journal of Agriculture and Biology* 12:401-405.
264. Paik I (2001) Management of excretion of phosphorus, nitrogen and pharmacological level minerals to reduce environmental pollution from animal production. *Asian Australasian Journal of Animal Sciences* 14(3):384-394.
265. Das T, Mondal M, Biswas P, Bairagi B, & Samanta C (2010) Influence of level of dietary inorganic and organic copper and energy level on the performance and nutrient utilization of broiler chickens. *Asian Aust J Anim* 23:82-89.
266. Bouwman AF, Boumans LJM, & Batjes NH (2002) Emissions of N<sub>2</sub>O and NO from fertilized fields: Summary of available measurement data. *Global Biogeochemical Cycles* 16(4):6-1-6-13.
267. Bouwman AF, Boumans LJM, & Batjes NH (2002) Modeling global annual N<sub>2</sub>O and NO emissions from fertilized fields. *Global Biogeochemical Cycles* 16(4):28-21-28-29.
268. Stehfest E & Bouwman L (2006) N<sub>2</sub>O and NO emission from agricultural fields and soils under natural vegetation: summarizing available measurement data and modeling of global annual emissions. *Nutrient Cycling in Agroecosystems* 74(3):207-228.
269. De Klein C, Eckard R, & der Weerden TV (2010) N<sub>2</sub>O Emissions from the nitrogen cycle in livestock agriculture: Estimation and mitigation. *Nitrous Oxide and Climate Change*, ed Smith K (Earthscan), pp 107-144.
270. Bouwman A, E Stehfest C van Kessel (2010) N<sub>2</sub>O emissions from the N cycle in arable agriculture: estimation and mitigation. *Nitrous Oxide and Climate Change*, ed Smith K (Earthscan), pp 85-106.
271. Well R & Butterblach-Bahl K (2010) Indirect emissions of N<sub>2</sub>O from nitrogen deposition and leaching of agricultural nitrogen. *Nitrous Oxide and Climate Change*, ed Smith K (Earthscan), pp 162-189.
